# Supplementary material for: Plasma Oxylipins and Their Precursors Are Strongly Associated with COVID-19 Severity and with Immune Response Markers
Source: MDPI journal article supplement (doi:10.3390/metabo12070619), 2022-07-04
Supplement: s1 [file s1]

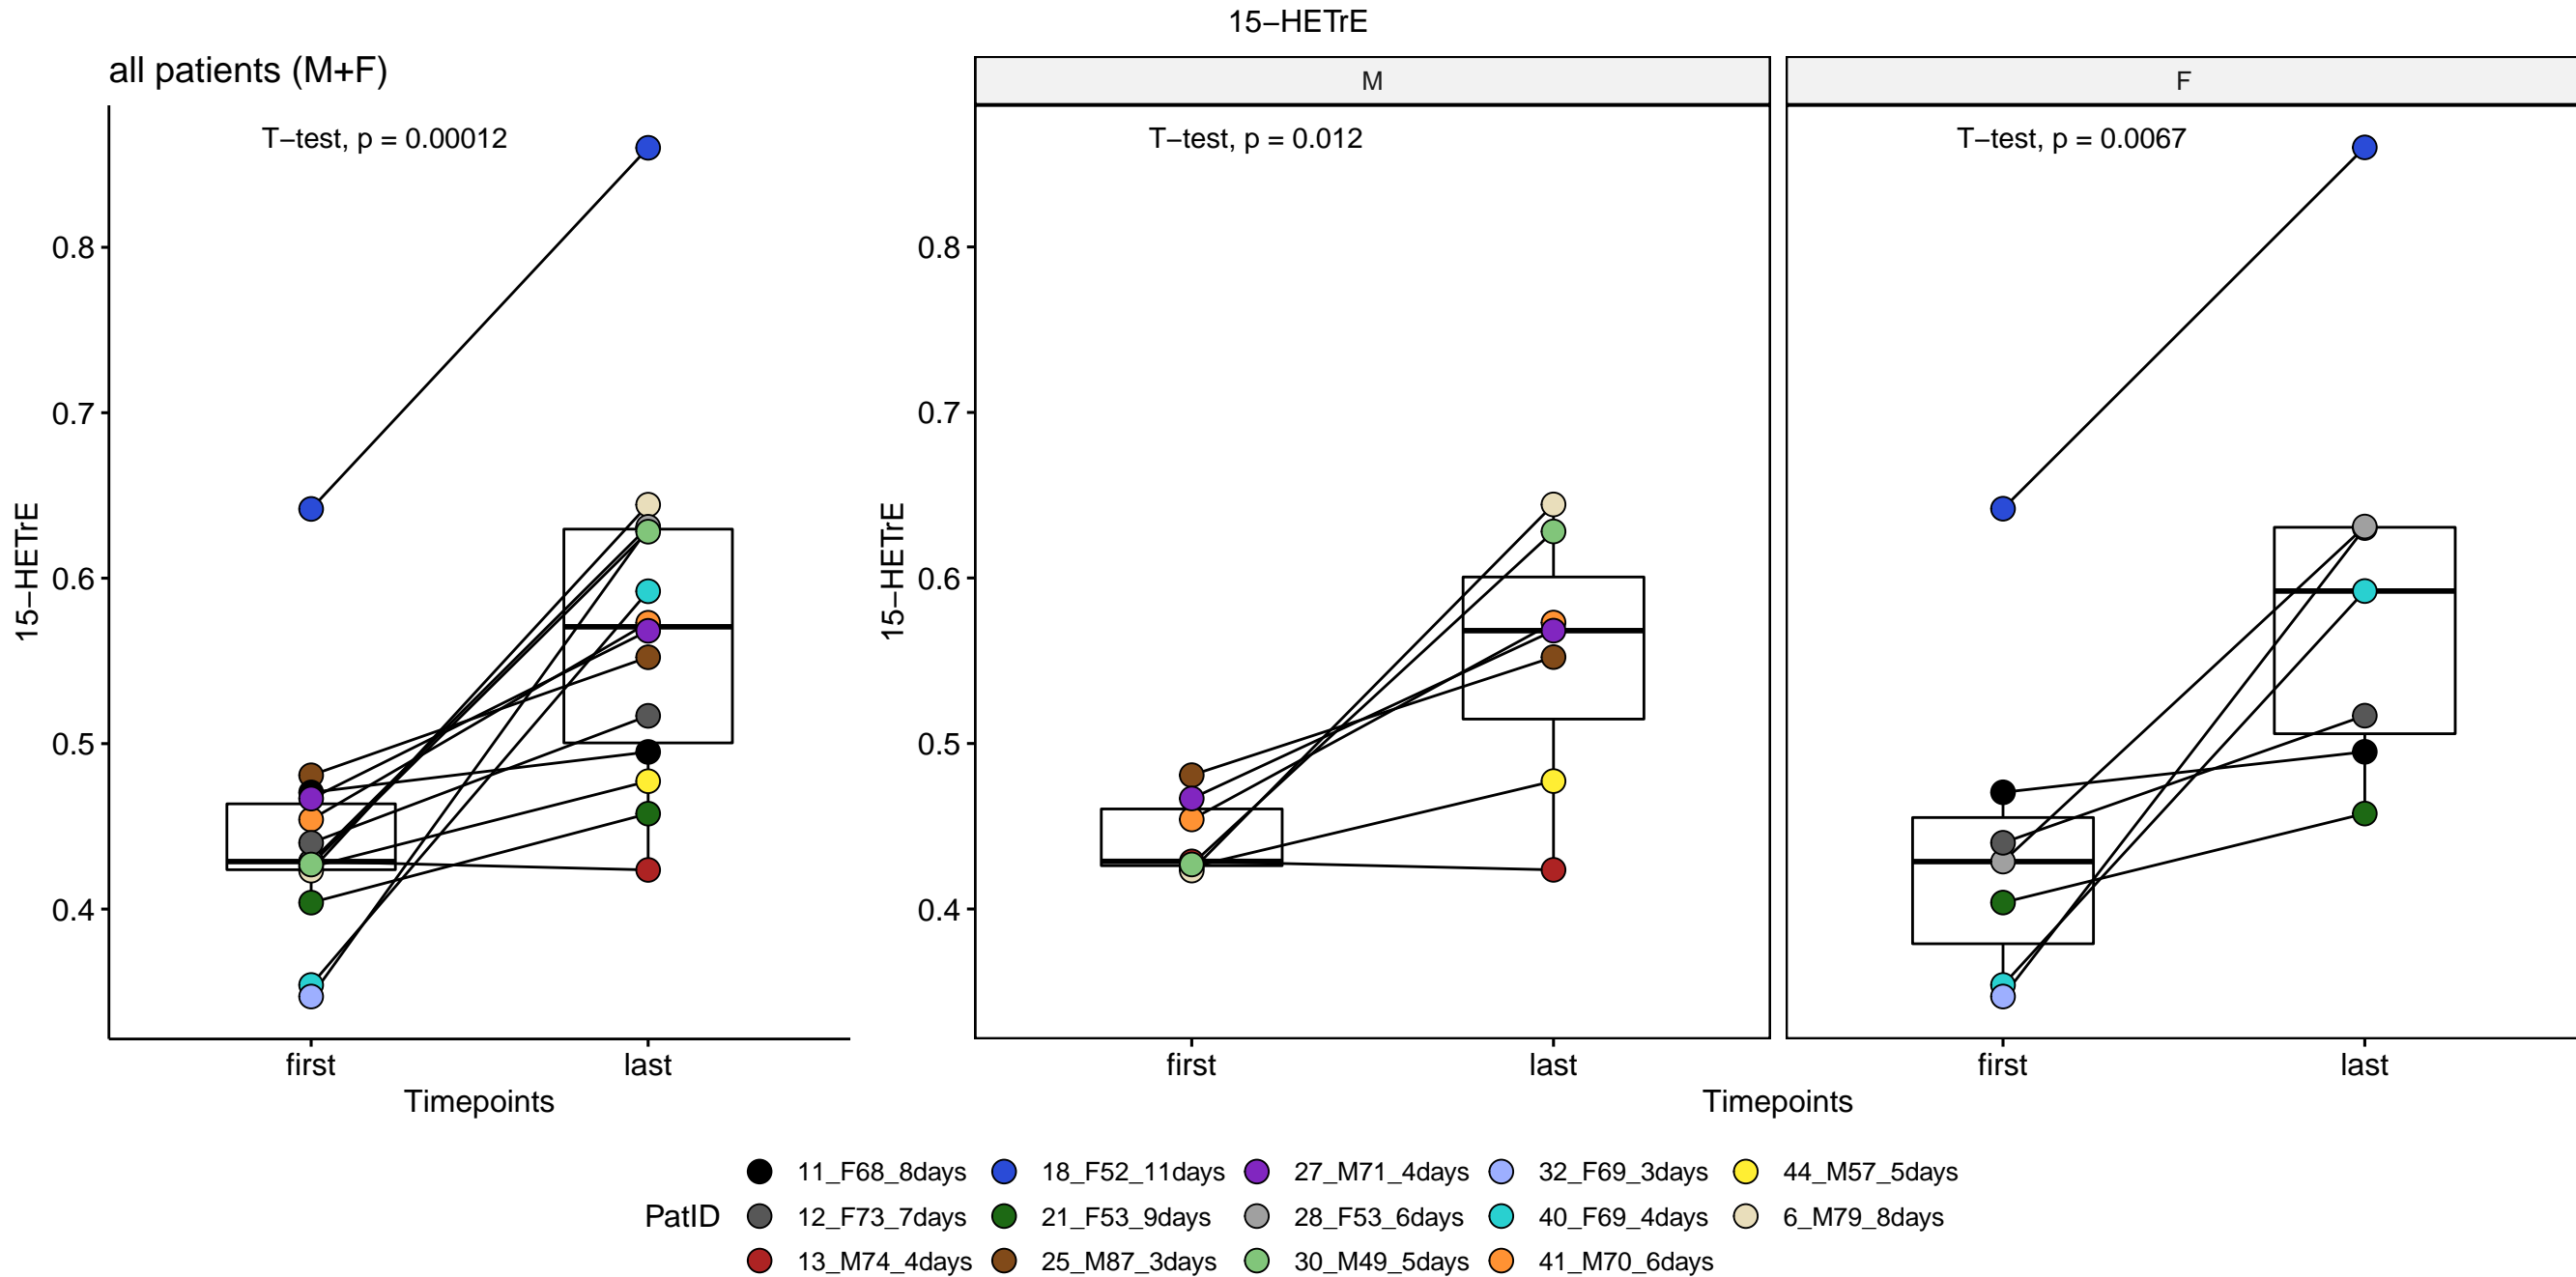

all patients (M+F)

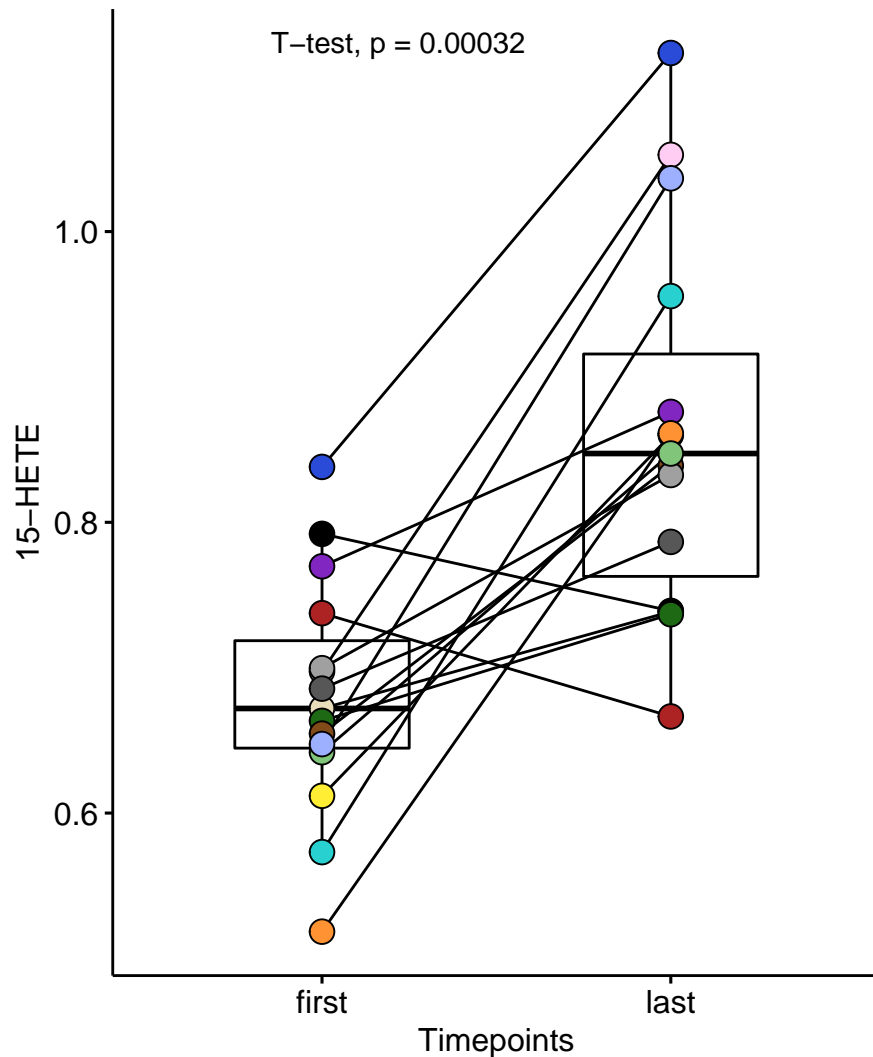

15-HETE

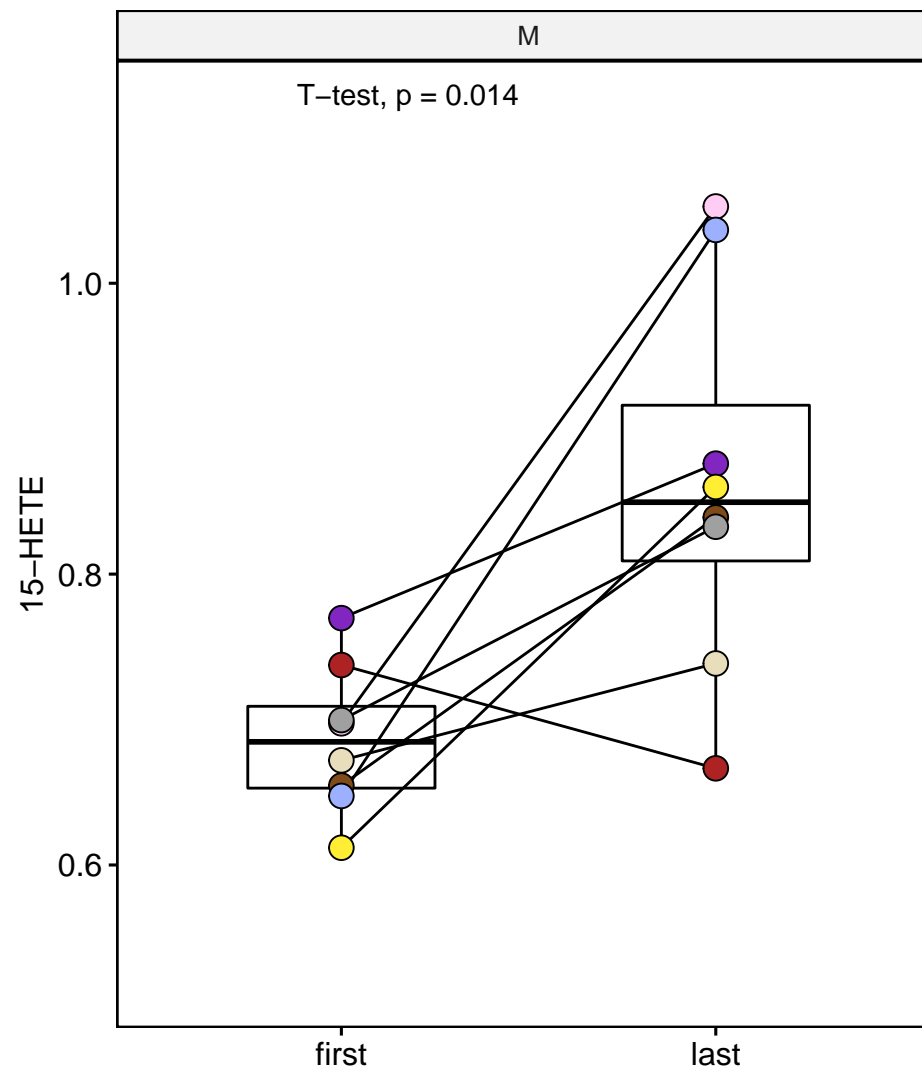

F

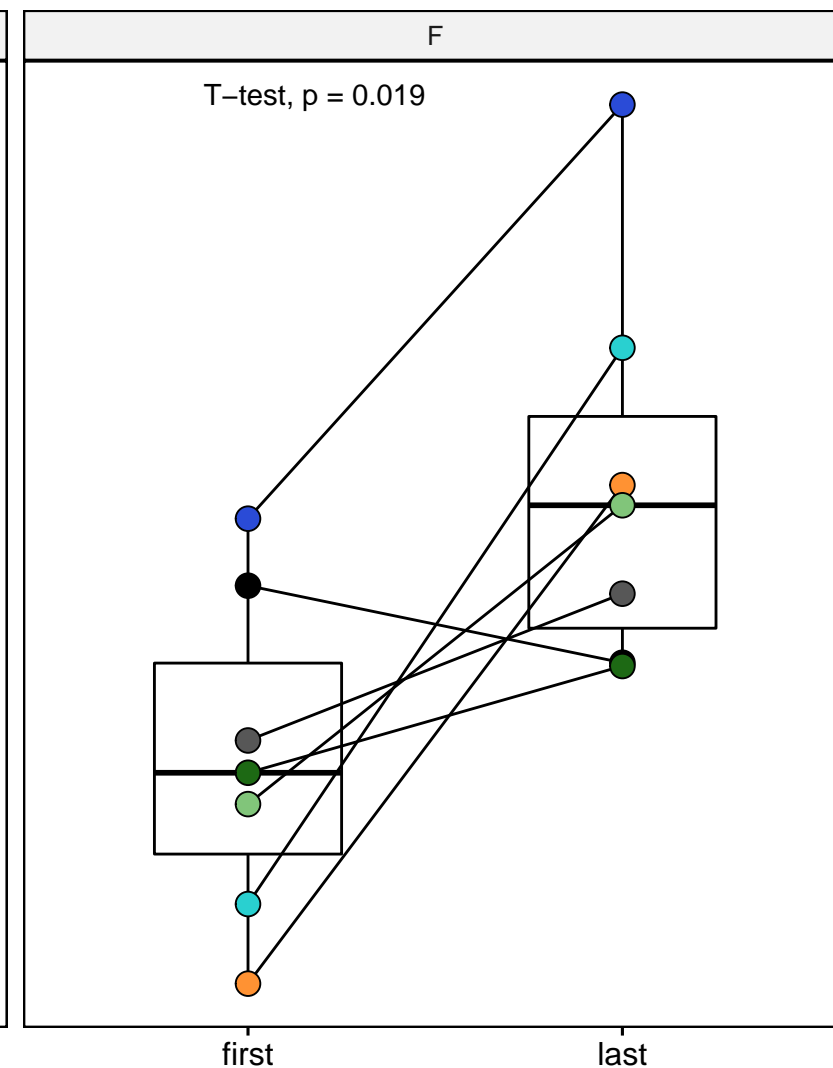

PatID

|                |                 |                |                |                |
|----------------|-----------------|----------------|----------------|----------------|
| ● 11_F68_8days | ● 18_F52_11days | ● 25_M87_3days | ● 30_M49_5days | ● 41_M70_6days |
| ● 12_F73_7days | ● 21_F53_9days  | ● 27_M71_4days | ● 32_F69_3days | ● 44_M57_5days |
| ● 13_M74_4days | ● 22_M65_3days  | ● 28_F53_6days | ● 40_F69_4days | ● 6_M79_8days  |

all patients (M+F)

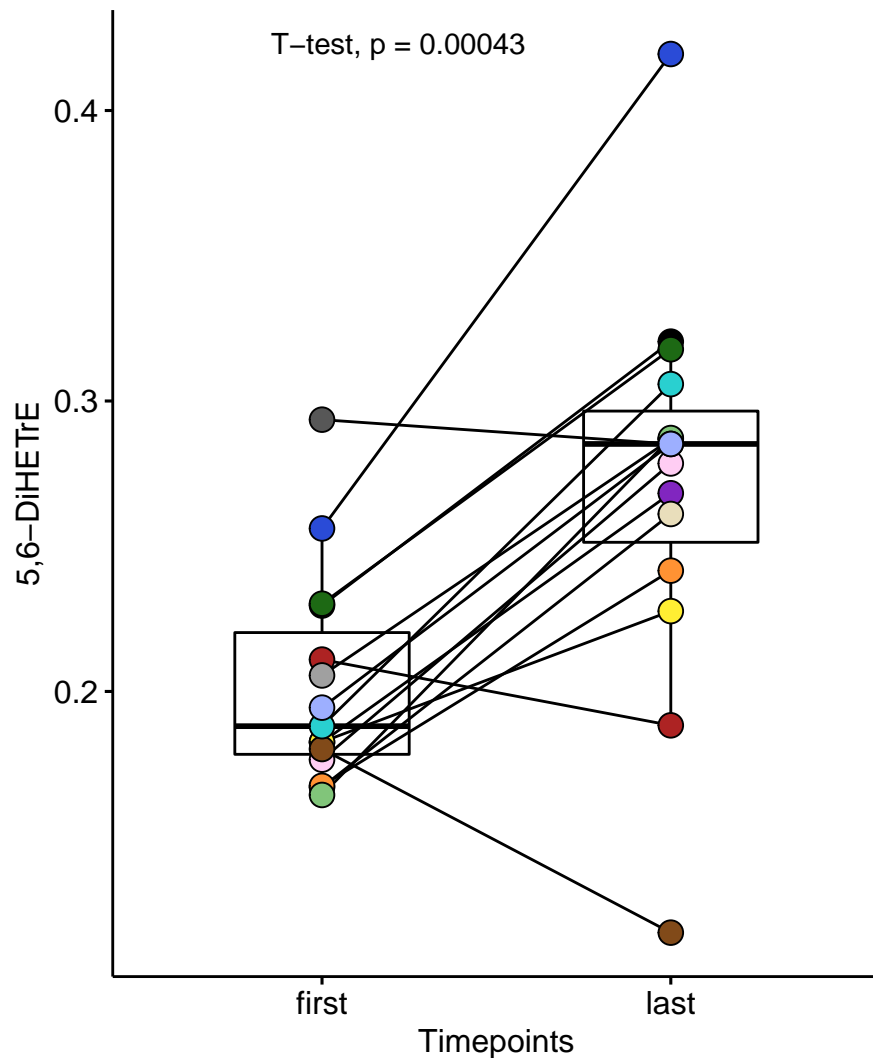

5,6-DiHETrE

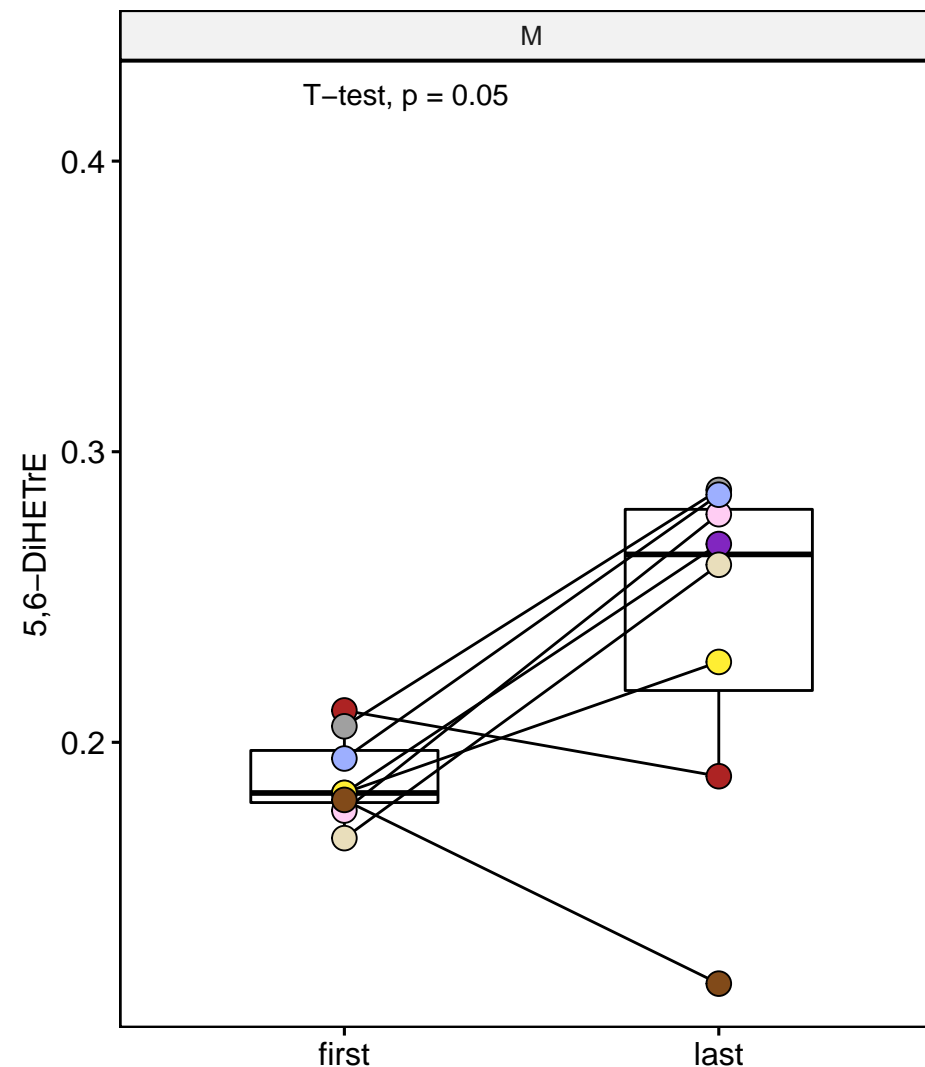

F

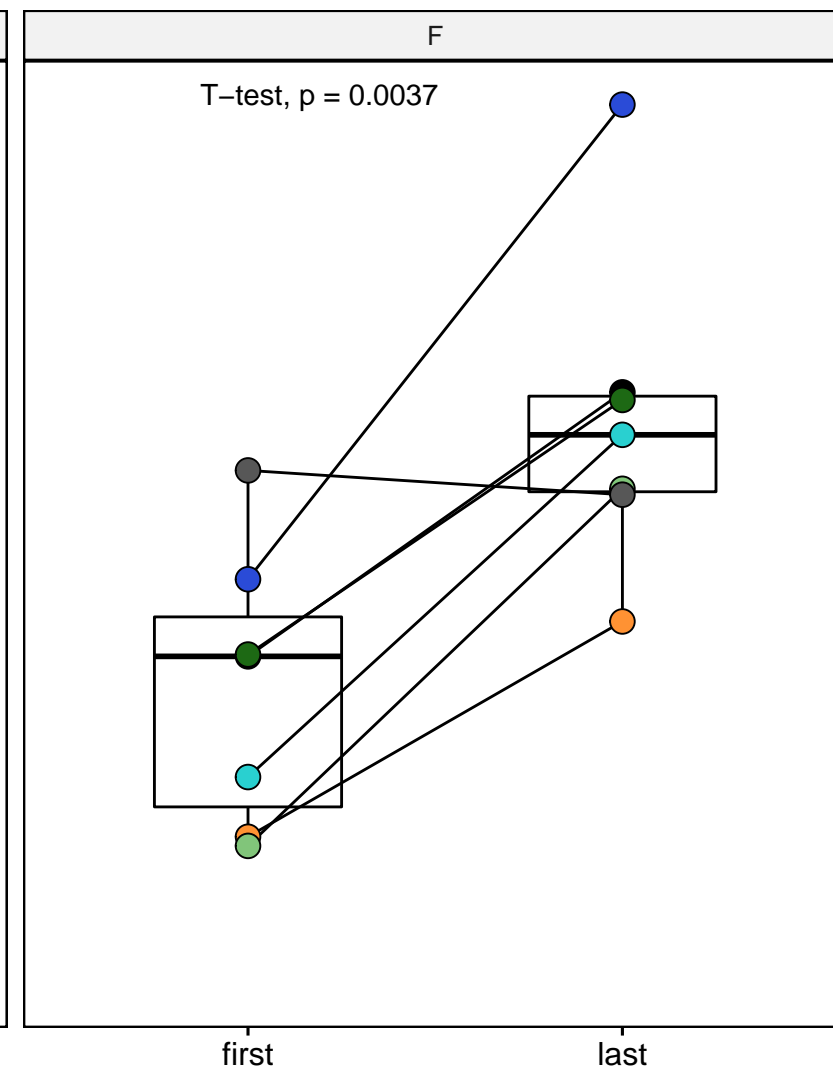

PatID

|                |                 |                |                |                |
|----------------|-----------------|----------------|----------------|----------------|
| ● 11_F68_8days | ● 18_F52_11days | ● 25_M87_3days | ● 30_M49_5days | ● 41_M70_6days |
| ● 12_F73_7days | ● 21_F53_9days  | ● 27_M71_4days | ● 32_F69_3days | ● 44_M57_5days |
| ● 13_M74_4days | ● 22_M65_3days  | ● 28_F53_6days | ● 40_F69_4days | ● 6_M79_8days  |

# 9-HEPE

all patients (M+F)

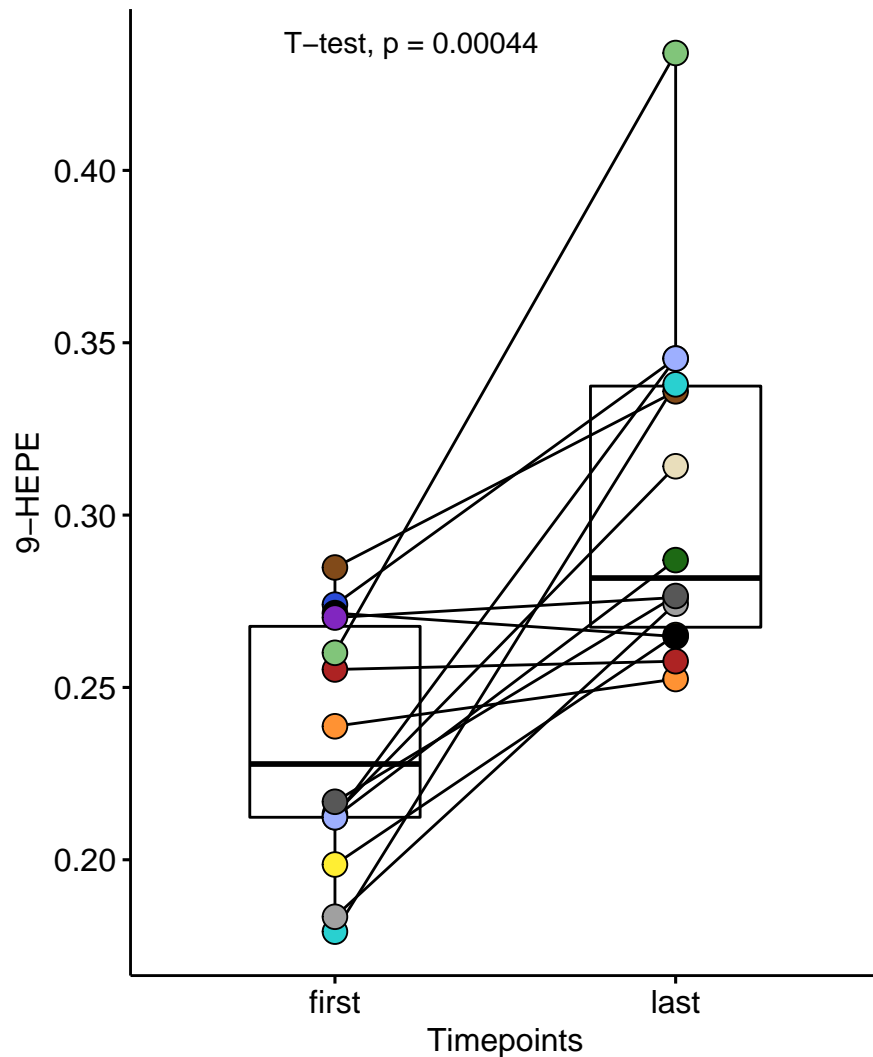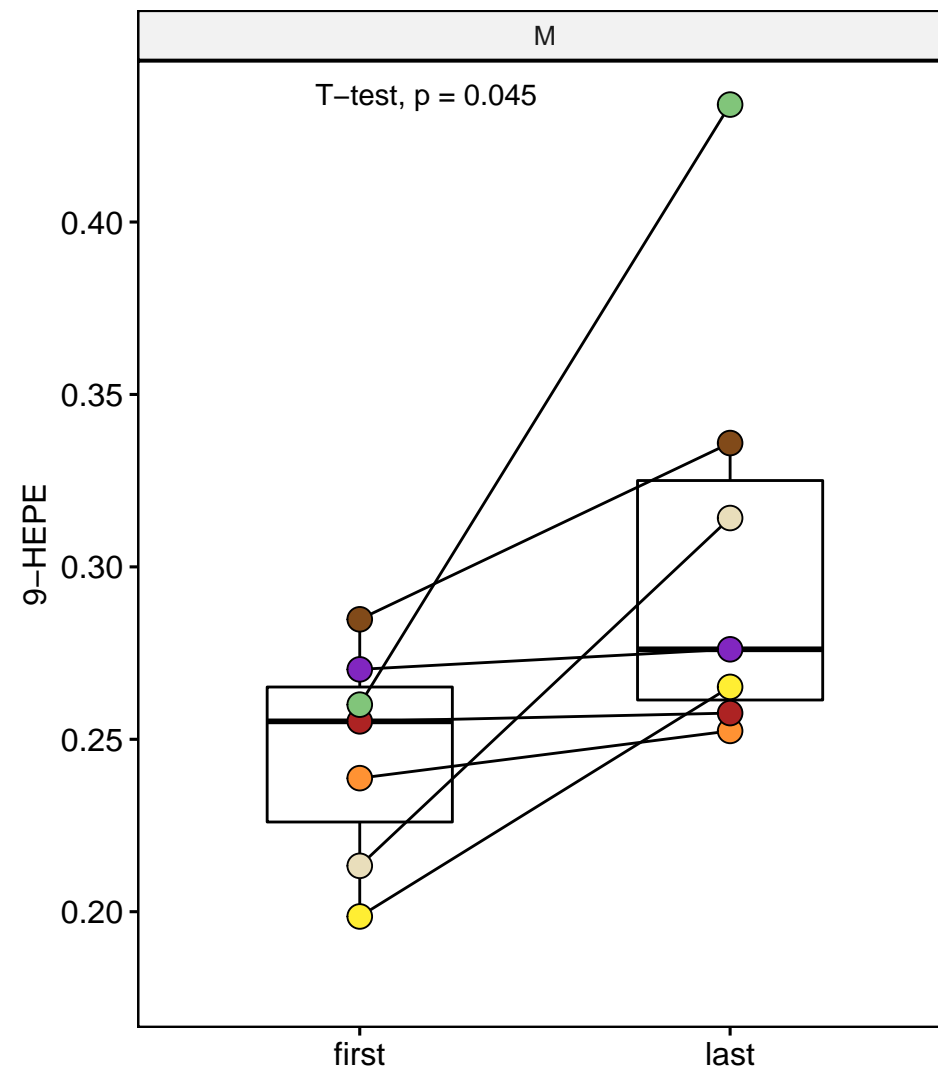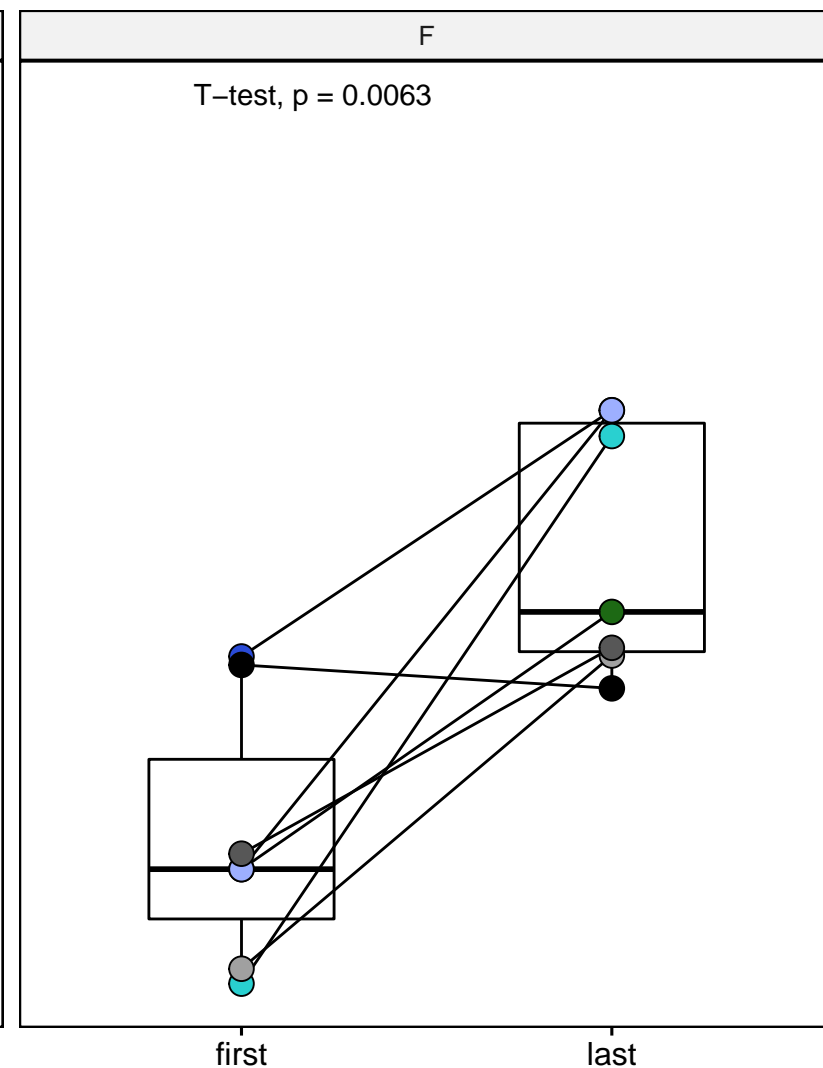

PatID

|                |                 |                |                |                |
|----------------|-----------------|----------------|----------------|----------------|
| ● 11_F68_8days | ● 18_F52_11days | ● 27_M71_4days | ● 32_F69_3days | ● 44_M57_5days |
| ● 12_F73_7days | ● 21_F53_9days  | ● 28_F53_6days | ● 40_F69_4days | ● 6_M79_8days  |
| ● 13_M74_4days | ● 25_M87_3days  | ● 30_M49_5days | ● 41_M70_6days |                |

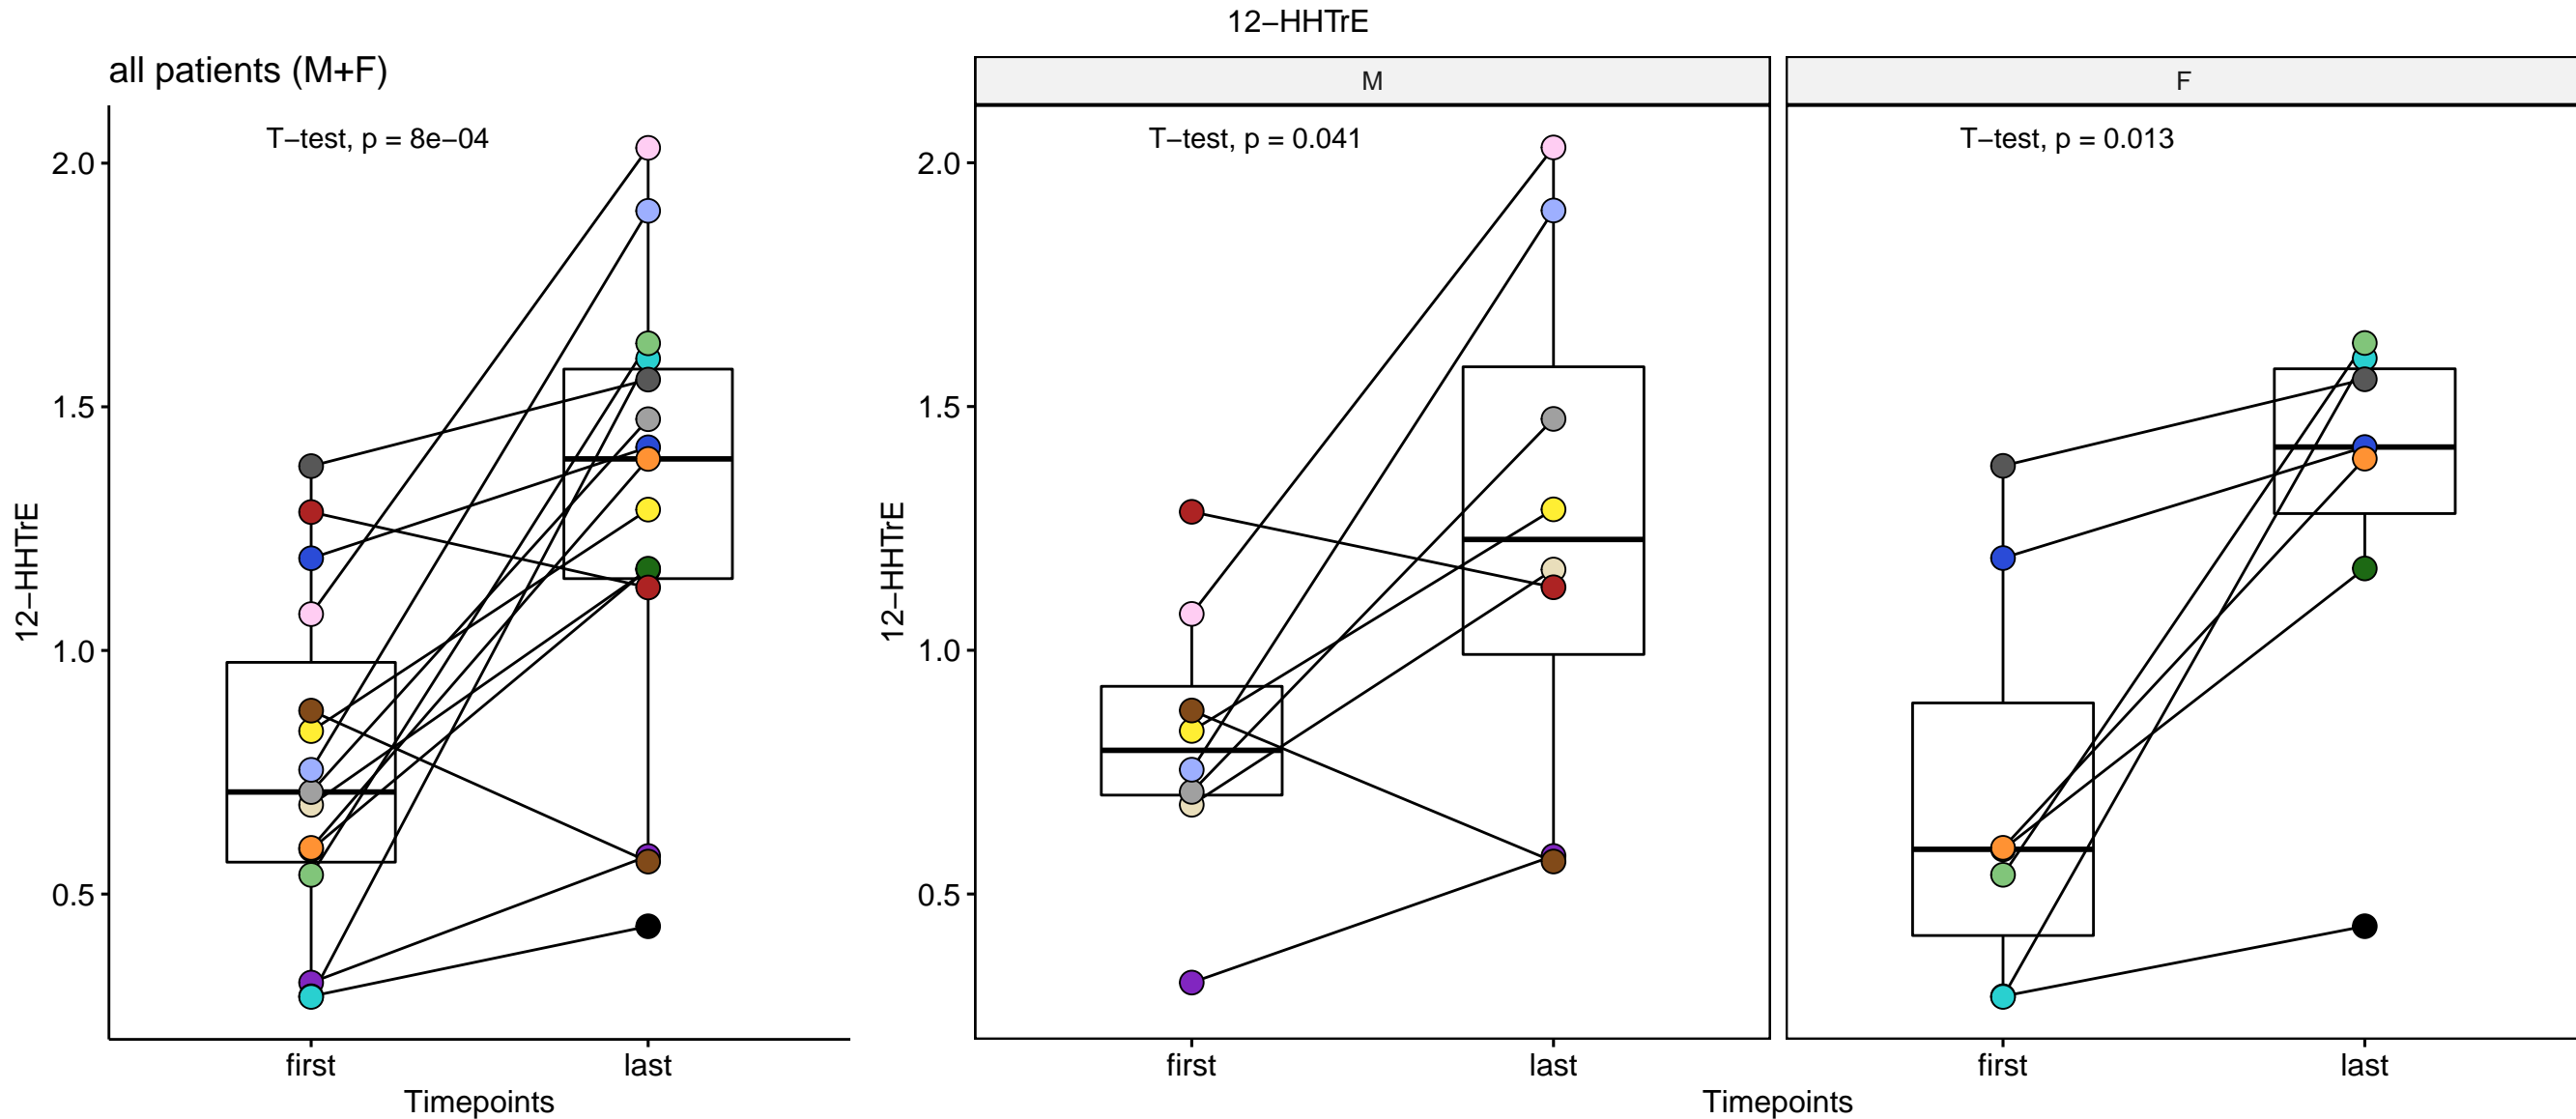

PatID

|              |               |              |              |              |
|--------------|---------------|--------------|--------------|--------------|
| 11_F68_8days | 18_F52_11days | 25_M87_3days | 30_M49_5days | 41_M70_6days |
| 12_F73_7days | 21_F53_9days  | 27_M71_4days | 32_F69_3days | 44_M57_5days |
| 13_M74_4days | 22_M65_3days  | 28_F53_6days | 40_F69_4days | 6_M79_8days  |

all patients (M+F)

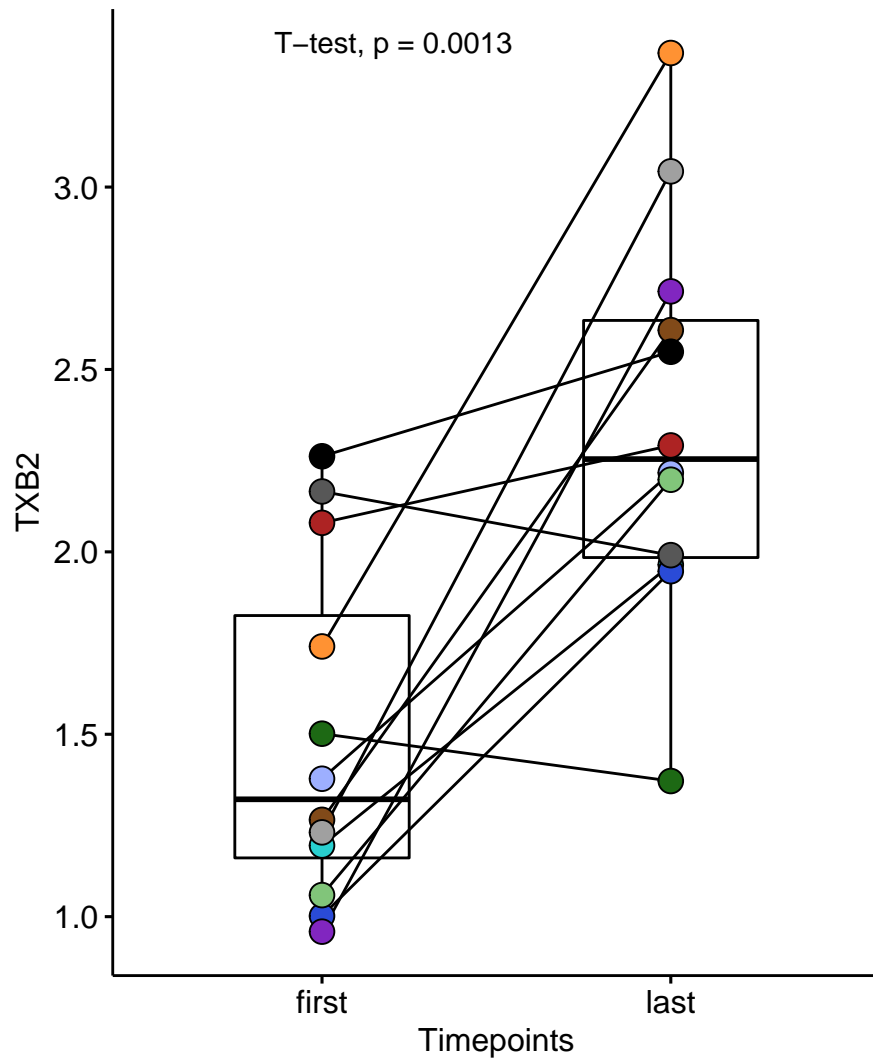

TXB2

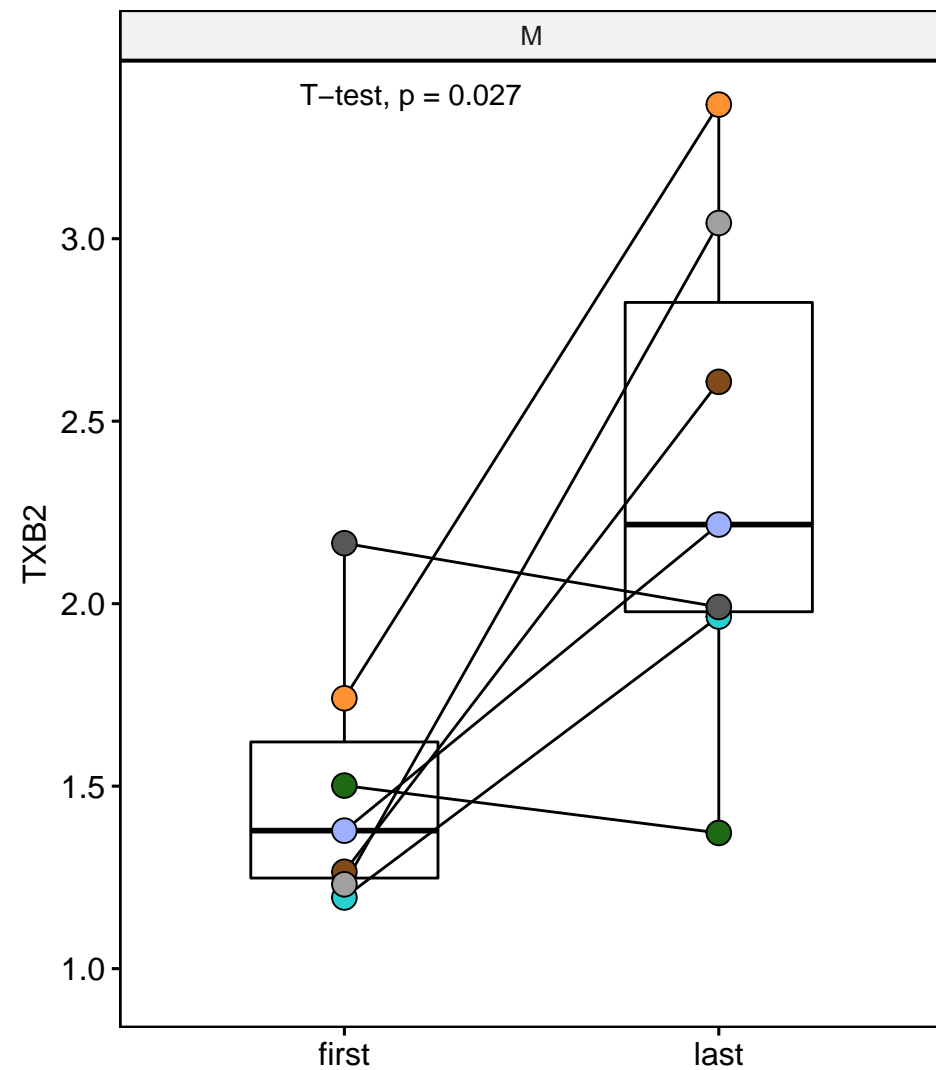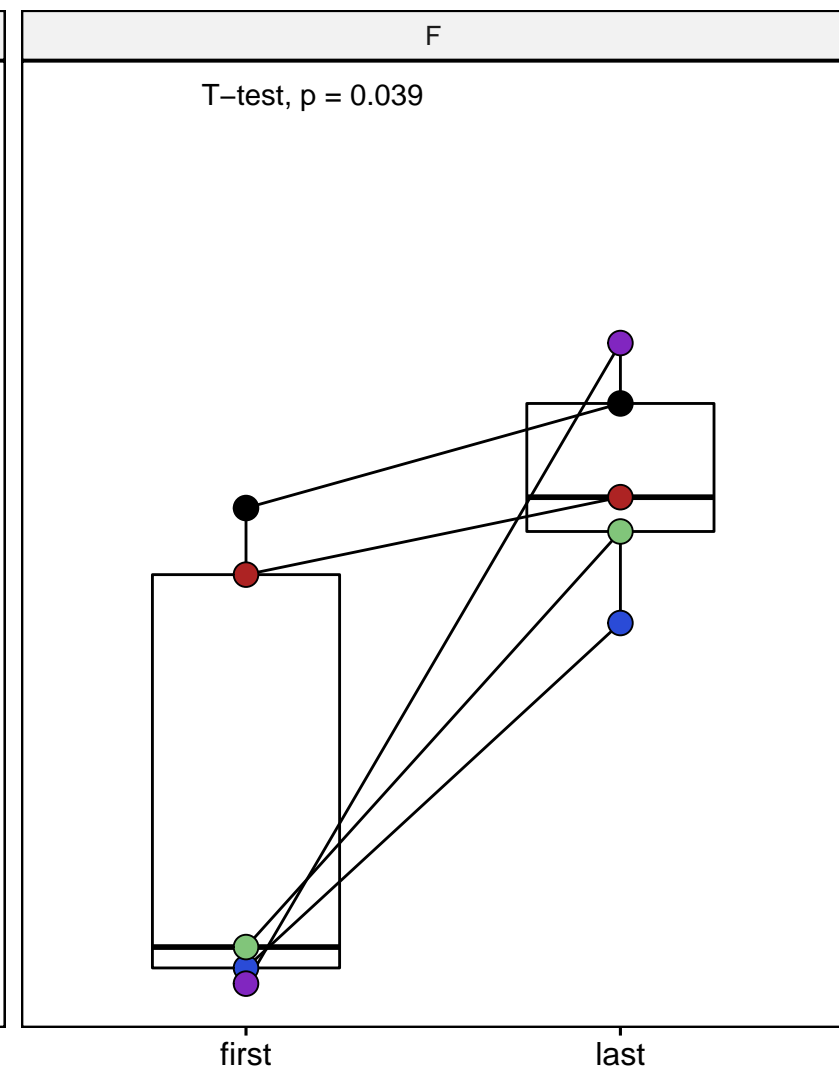

PatID

|               |              |              |              |
|---------------|--------------|--------------|--------------|
| 12_F73_7days  | 21_F53_9days | 28_F53_6days | 41_M70_6days |
| 13_M74_4days  | 22_M65_3days | 30_M49_5days | 44_M57_5days |
| 18_F52_11days | 27_M71_4days | 40_F69_4days | 6_M79_8days  |

# 8,9-DiHETrE

all patients (M+F)

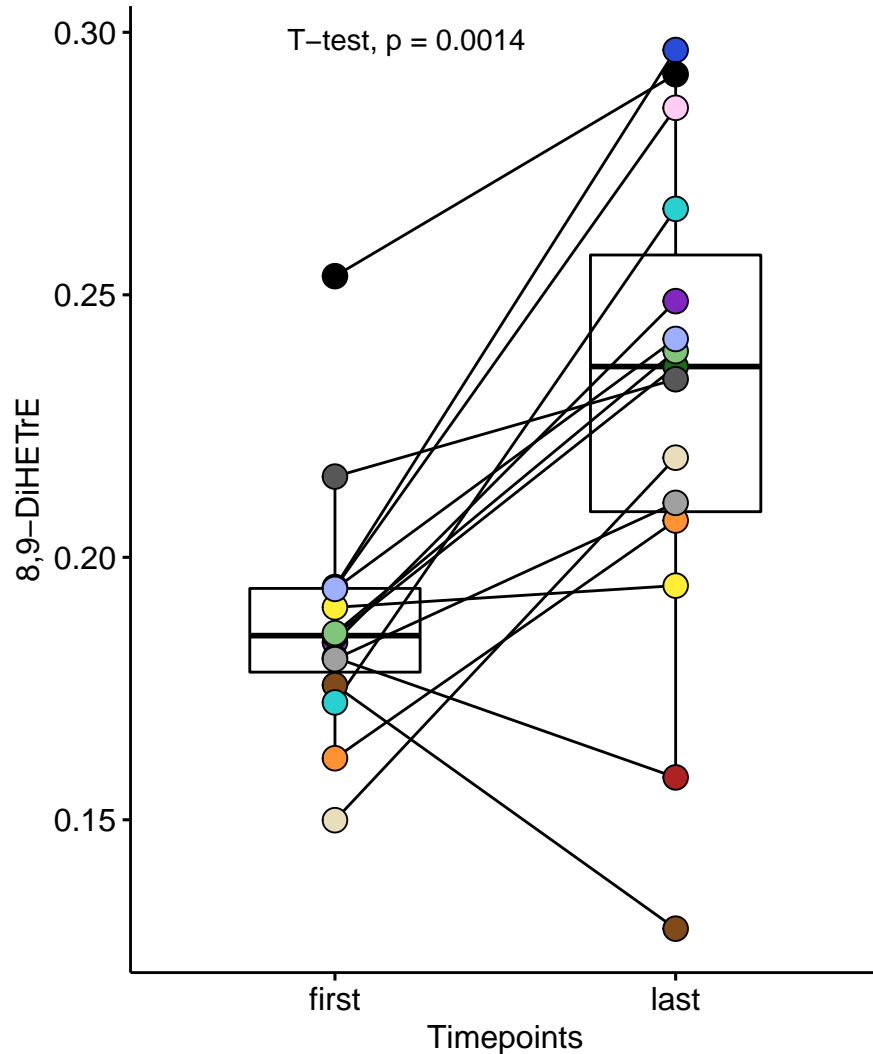

M

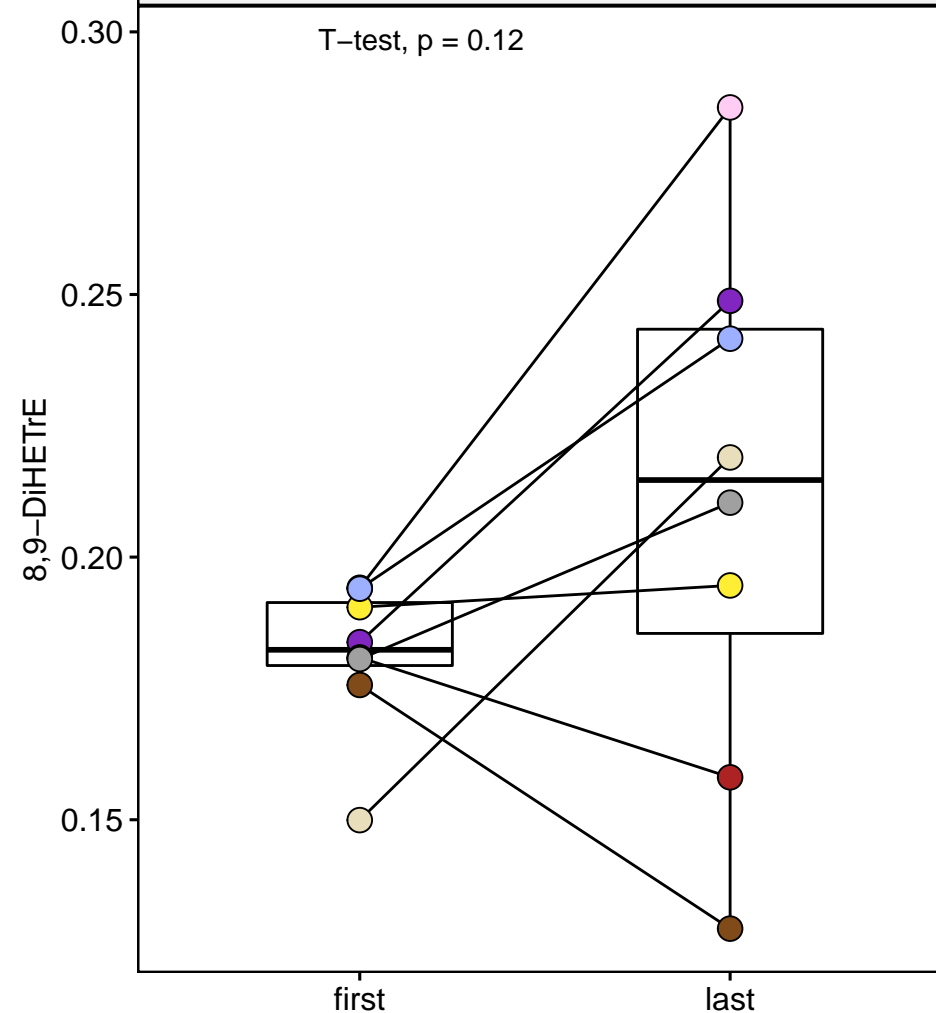

F

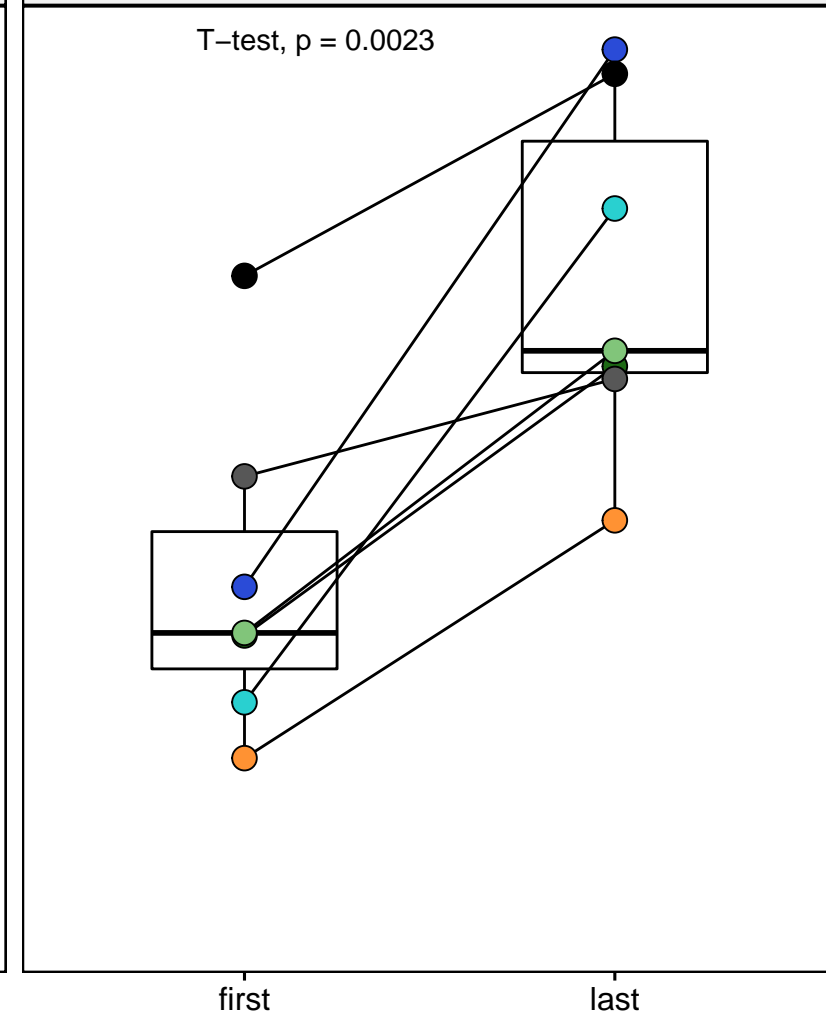

PatID

|                |                 |                |                |                |
|----------------|-----------------|----------------|----------------|----------------|
| ● 11_F68_8days | ● 18_F52_11days | ● 25_M87_3days | ● 30_M49_5days | ● 41_M70_6days |
| ● 12_F73_7days | ● 21_F53_9days  | ● 27_M71_4days | ● 32_F69_3days | ● 44_M57_5days |
| ● 13_M74_4days | ● 22_M65_3days  | ● 28_F53_6days | ● 40_F69_4days | ● 6_M79_8days  |

all patients (M+F)

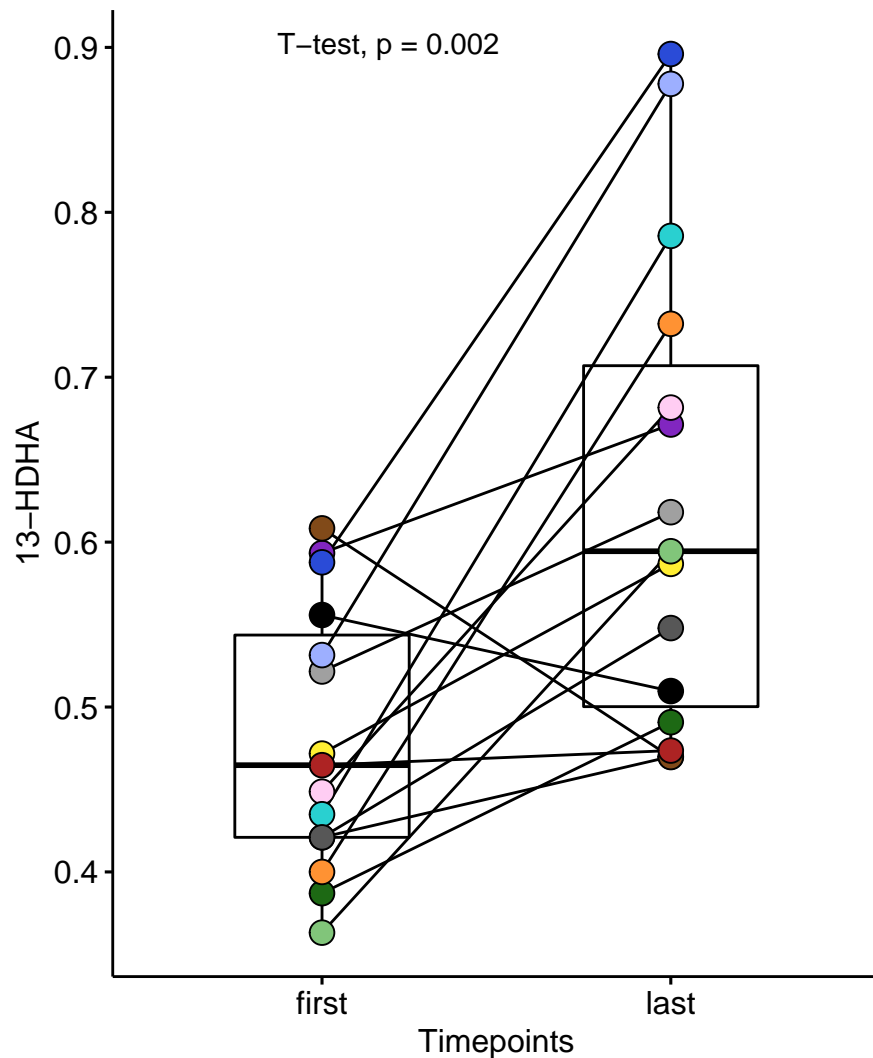

13-HDHA

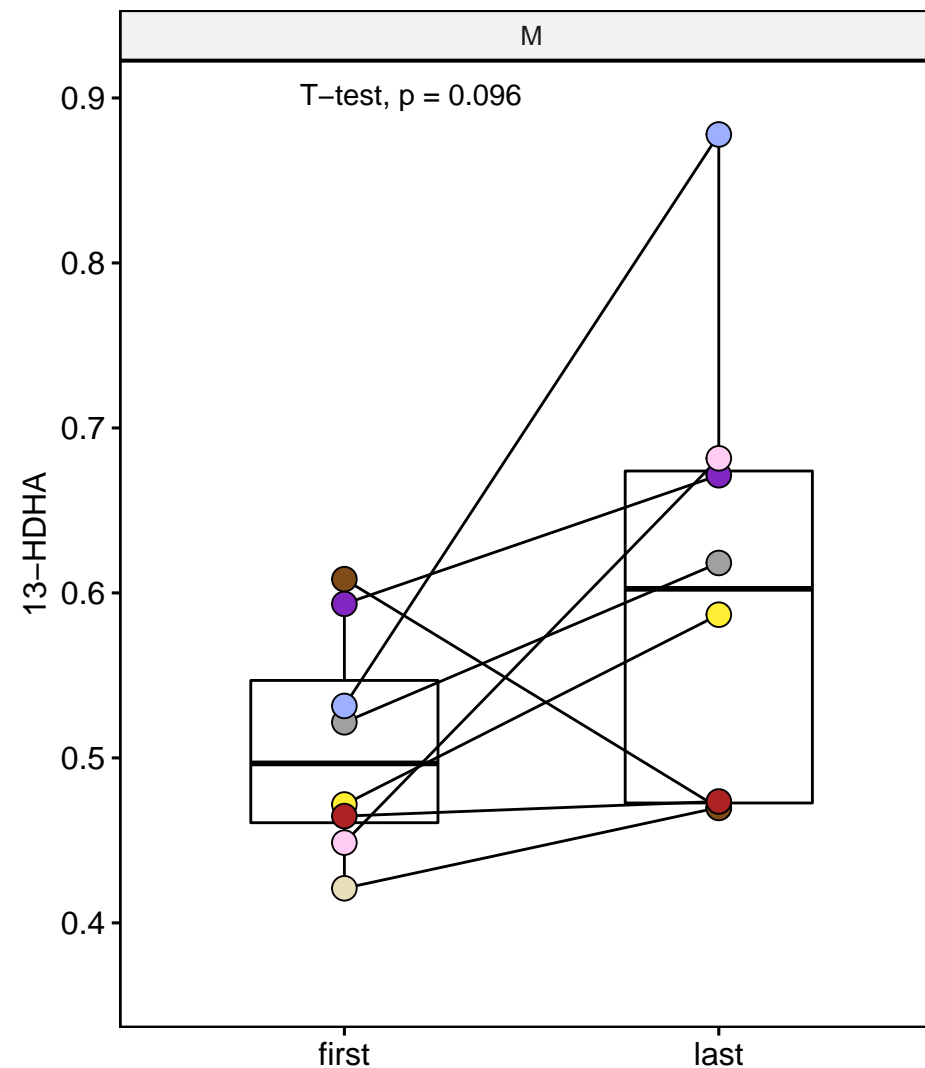

F

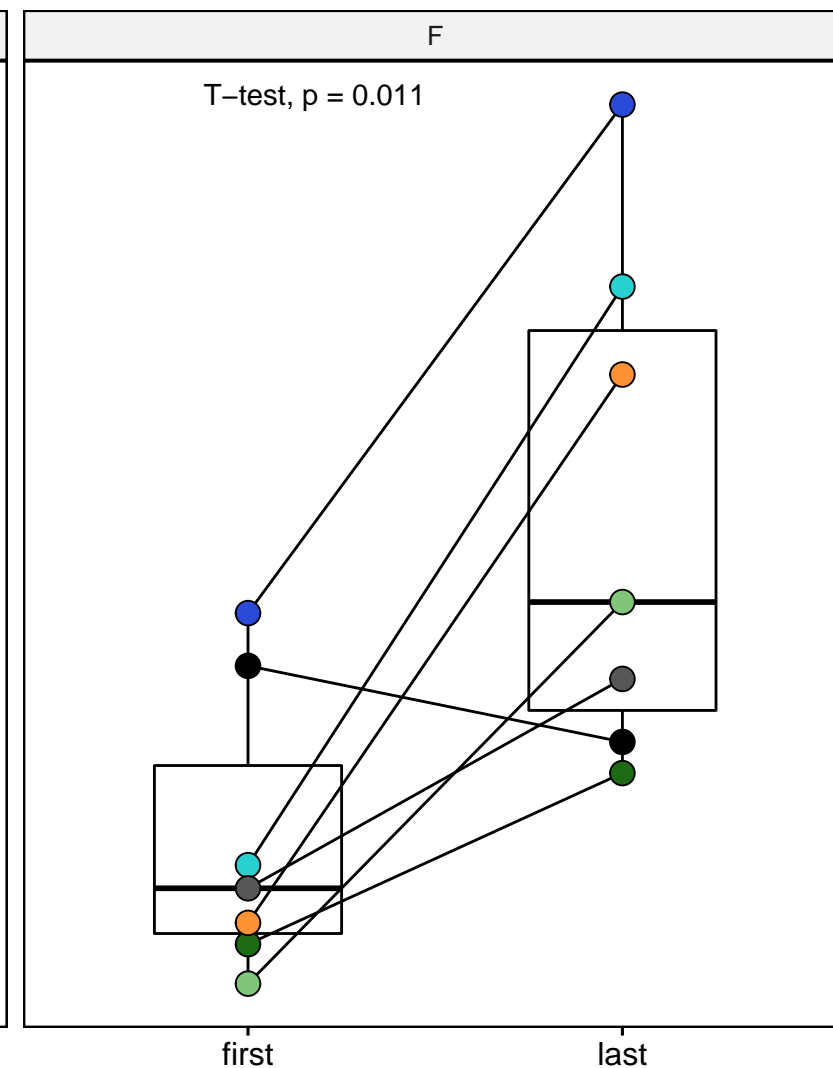

PatID

|                |                 |                |                |                |
|----------------|-----------------|----------------|----------------|----------------|
| ● 11_F68_8days | ● 18_F52_11days | ● 25_M87_3days | ● 30_M49_5days | ● 41_M70_6days |
| ● 12_F73_7days | ● 21_F53_9days  | ● 27_M71_4days | ● 32_F69_3days | ● 44_M57_5days |
| ● 13_M74_4days | ● 22_M65_3days  | ● 28_F53_6days | ● 40_F69_4days | ● 6_M79_8days  |



# 14-HDHA

all patients (M+F)

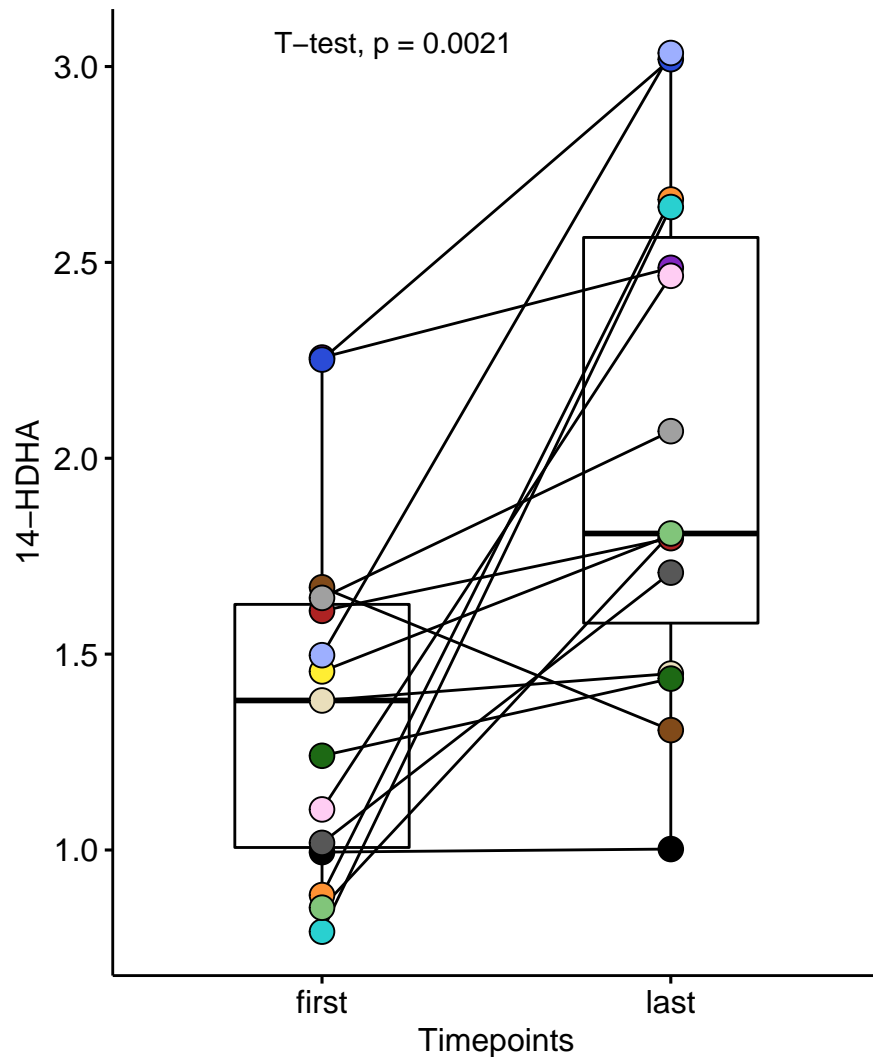

M

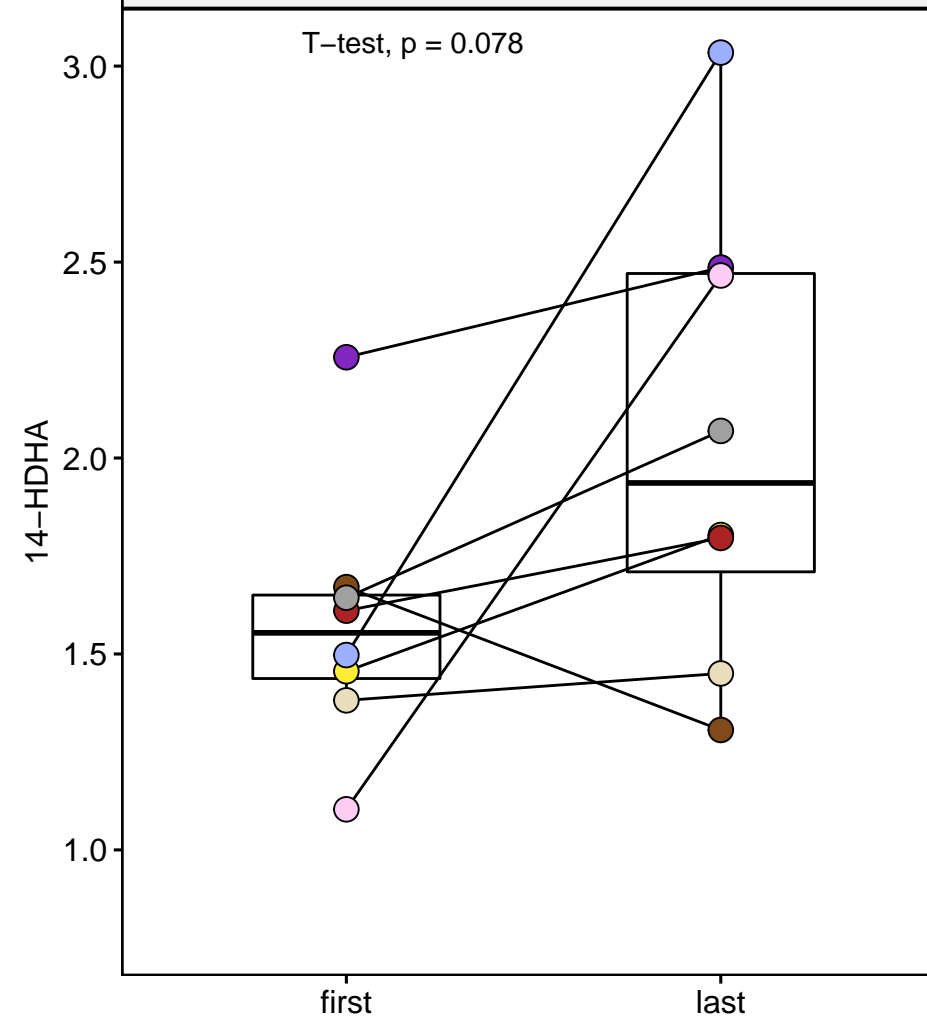

F

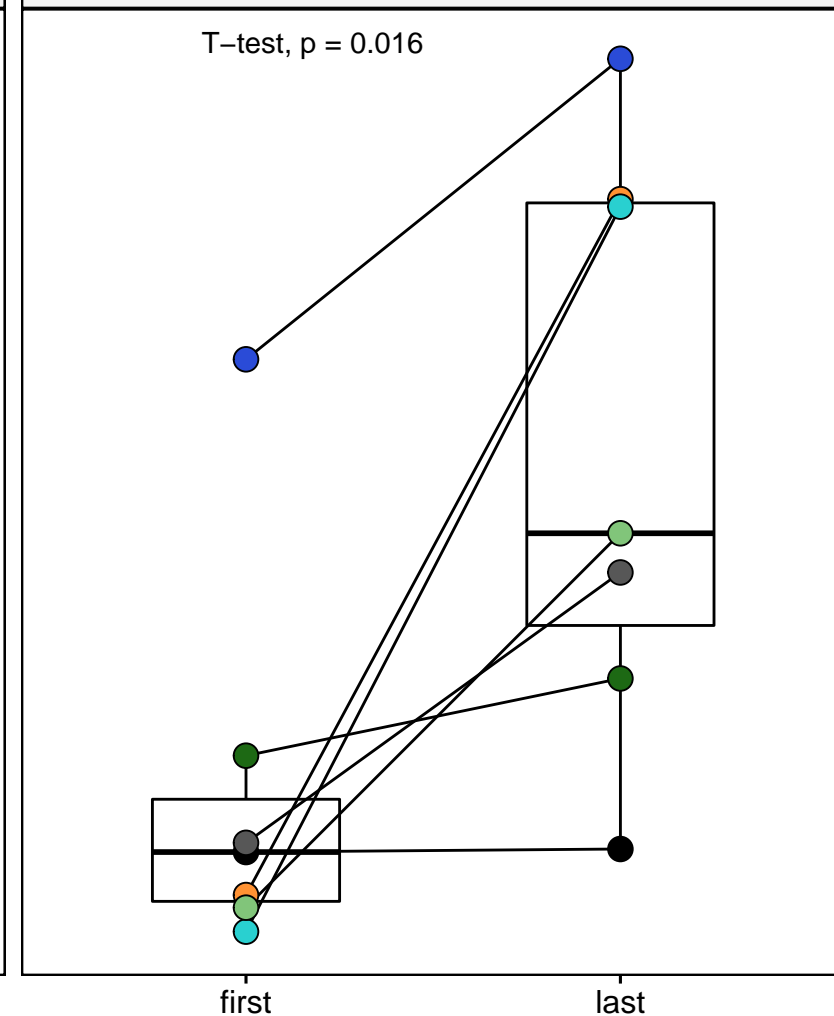

PatID

|                |                 |                |                |                |
|----------------|-----------------|----------------|----------------|----------------|
| ● 11_F68_8days | ● 18_F52_11days | ● 25_M87_3days | ● 30_M49_5days | ● 41_M70_6days |
| ● 12_F73_7days | ● 21_F53_9days  | ● 27_M71_4days | ● 32_F69_3days | ● 44_M57_5days |
| ● 13_M74_4days | ● 22_M65_3days  | ● 28_F53_6days | ● 40_F69_4days | ● 6_M79_8days  |

# 13-HODE

all patients (M+F)

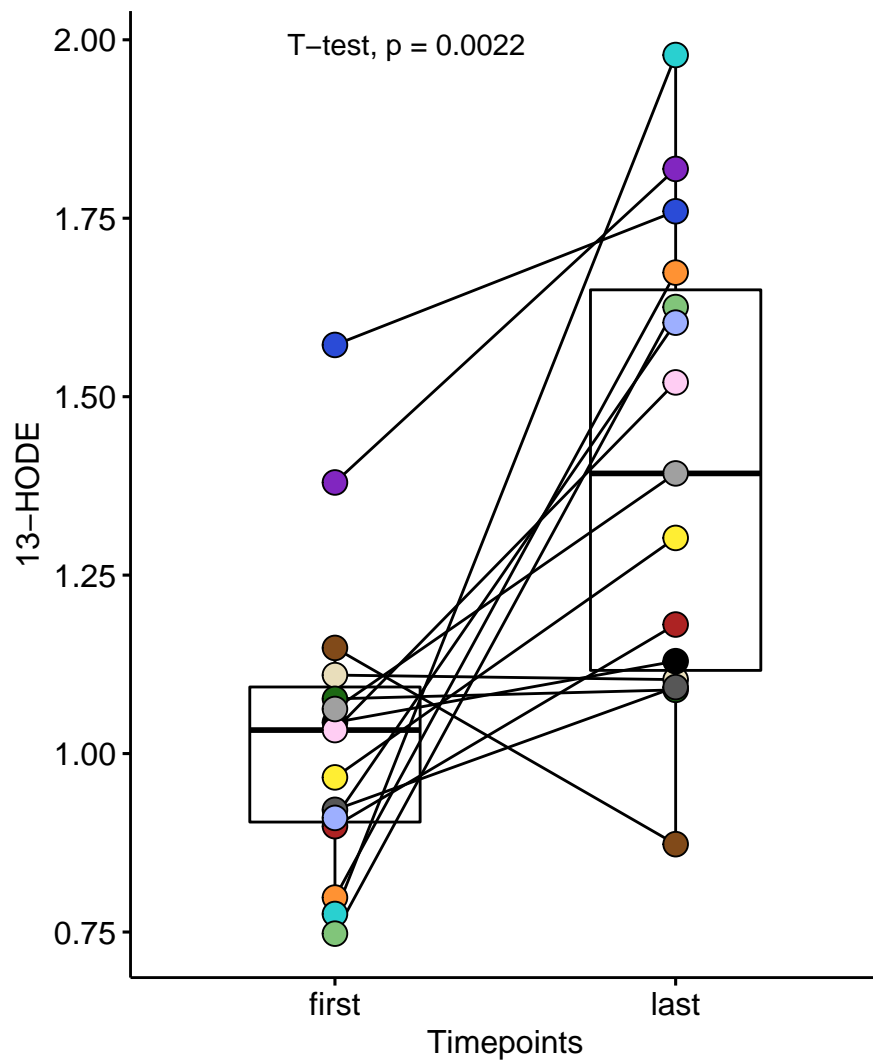

M

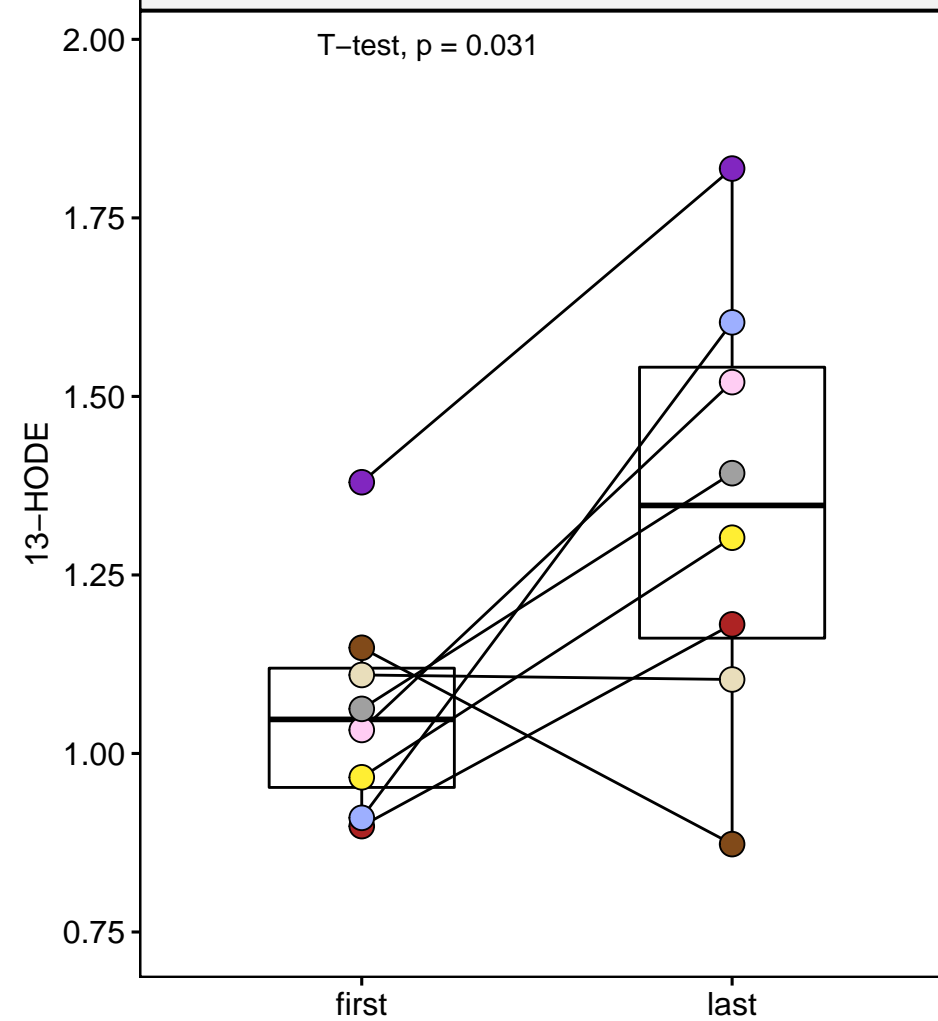

F

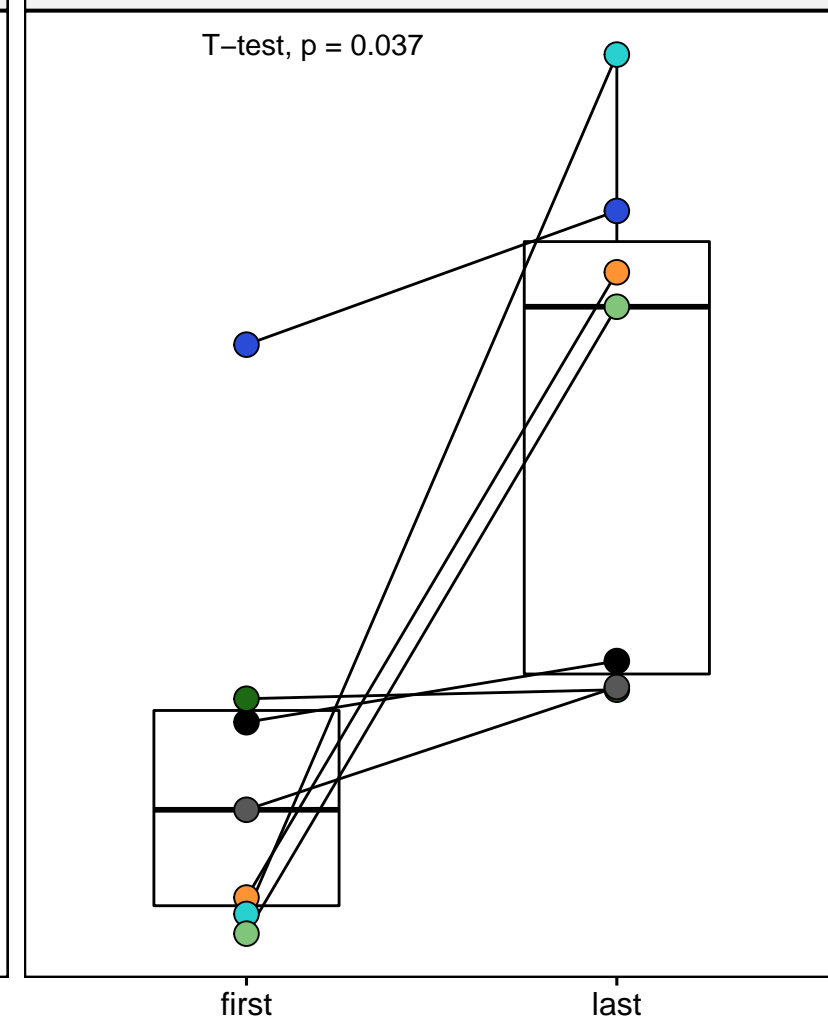

PatID

|                |                 |                |                |                |
|----------------|-----------------|----------------|----------------|----------------|
| ● 11_F68_8days | ● 18_F52_11days | ● 25_M87_3days | ● 30_M49_5days | ● 41_M70_6days |
| ● 12_F73_7days | ● 21_F53_9days  | ● 27_M71_4days | ● 32_F69_3days | ● 44_M57_5days |
| ● 13_M74_4days | ● 22_M65_3days  | ● 28_F53_6days | ● 40_F69_4days | ● 6_M79_8days  |

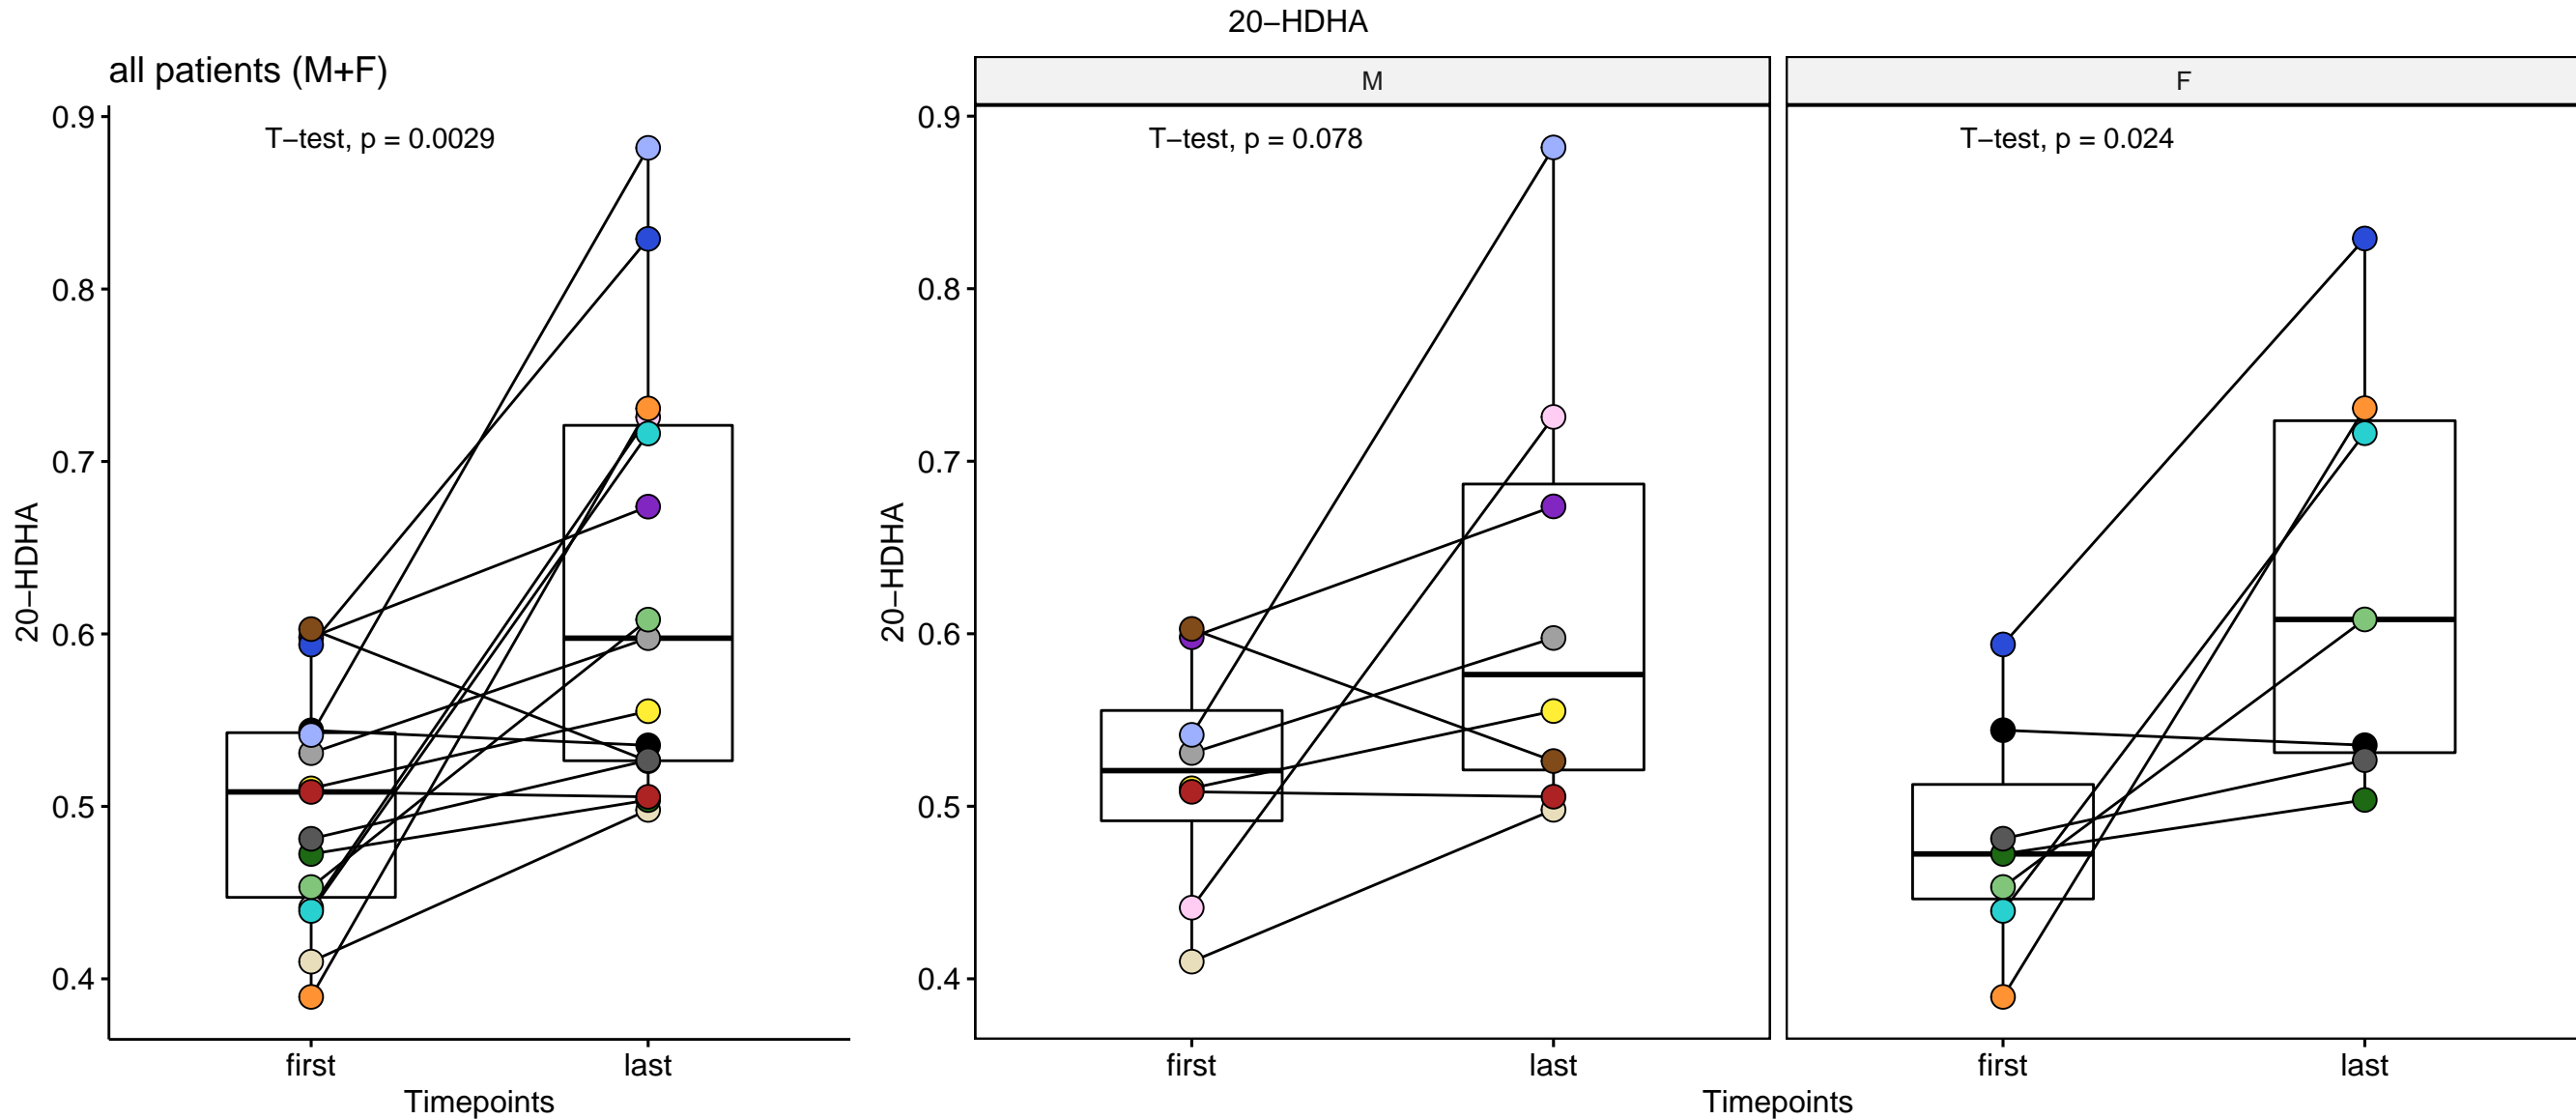

PatID

|              |               |              |              |              |
|--------------|---------------|--------------|--------------|--------------|
| 11_F68_8days | 18_F52_11days | 25_M87_3days | 30_M49_5days | 41_M70_6days |
| 12_F73_7days | 21_F53_9days  | 27_M71_4days | 32_F69_3days | 44_M57_5days |
| 13_M74_4days | 22_M65_3days  | 28_F53_6days | 40_F69_4days | 6_M79_8days  |

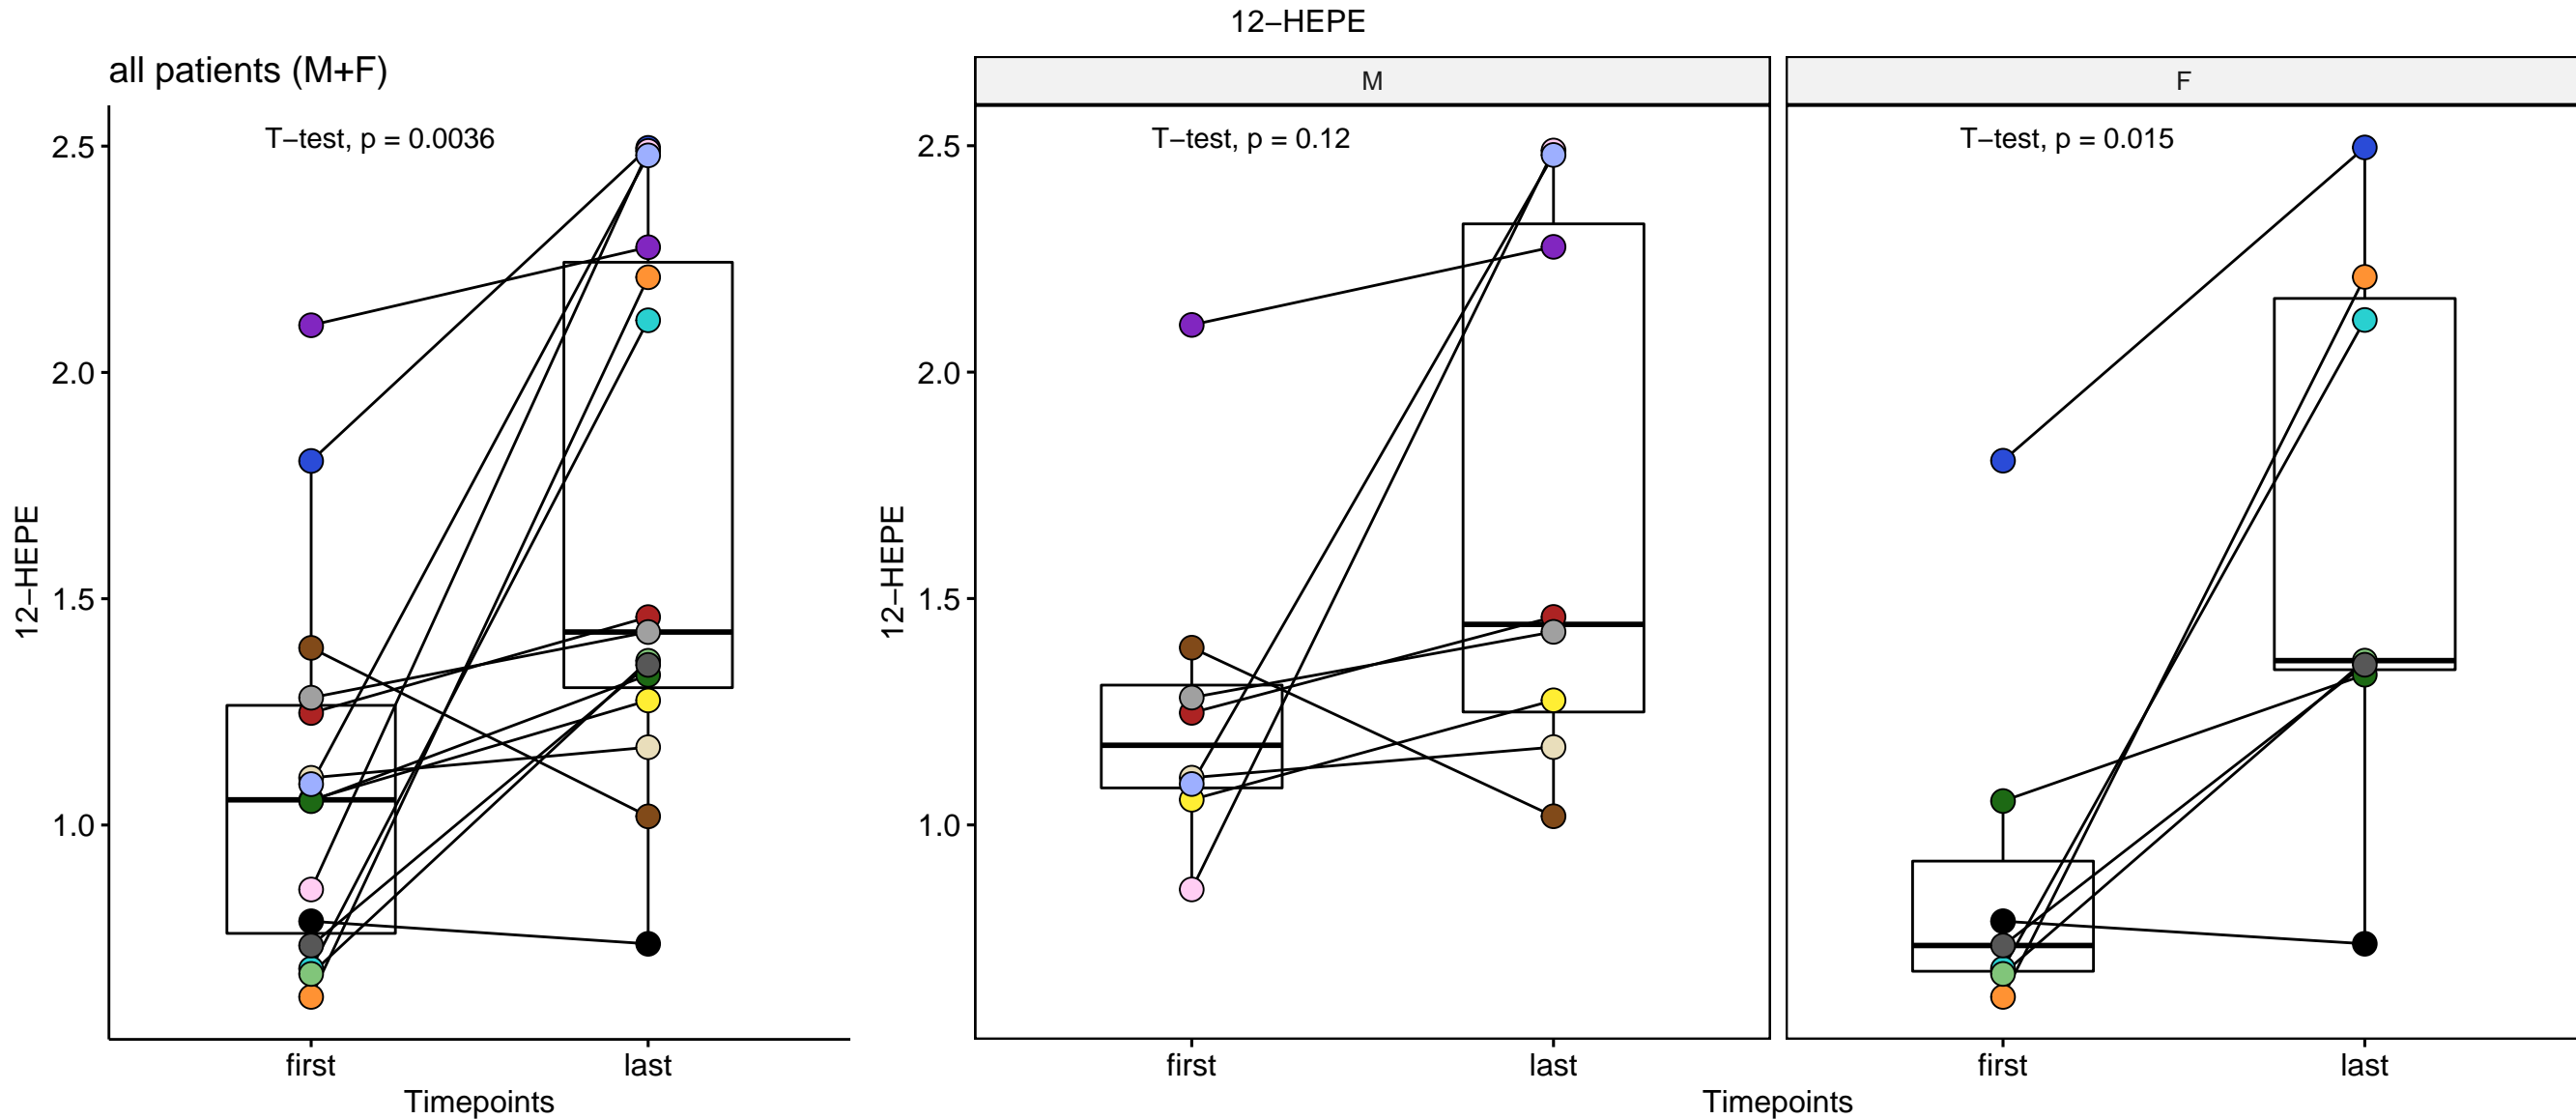

PatID

|              |               |              |              |              |
|--------------|---------------|--------------|--------------|--------------|
| 11_F68_8days | 18_F52_11days | 25_M87_3days | 30_M49_5days | 41_M70_6days |
| 12_F73_7days | 21_F53_9days  | 27_M71_4days | 32_F69_3days | 44_M57_5days |
| 13_M74_4days | 22_M65_3days  | 28_F53_6days | 40_F69_4days | 6_M79_8days  |

all patients (M+F)

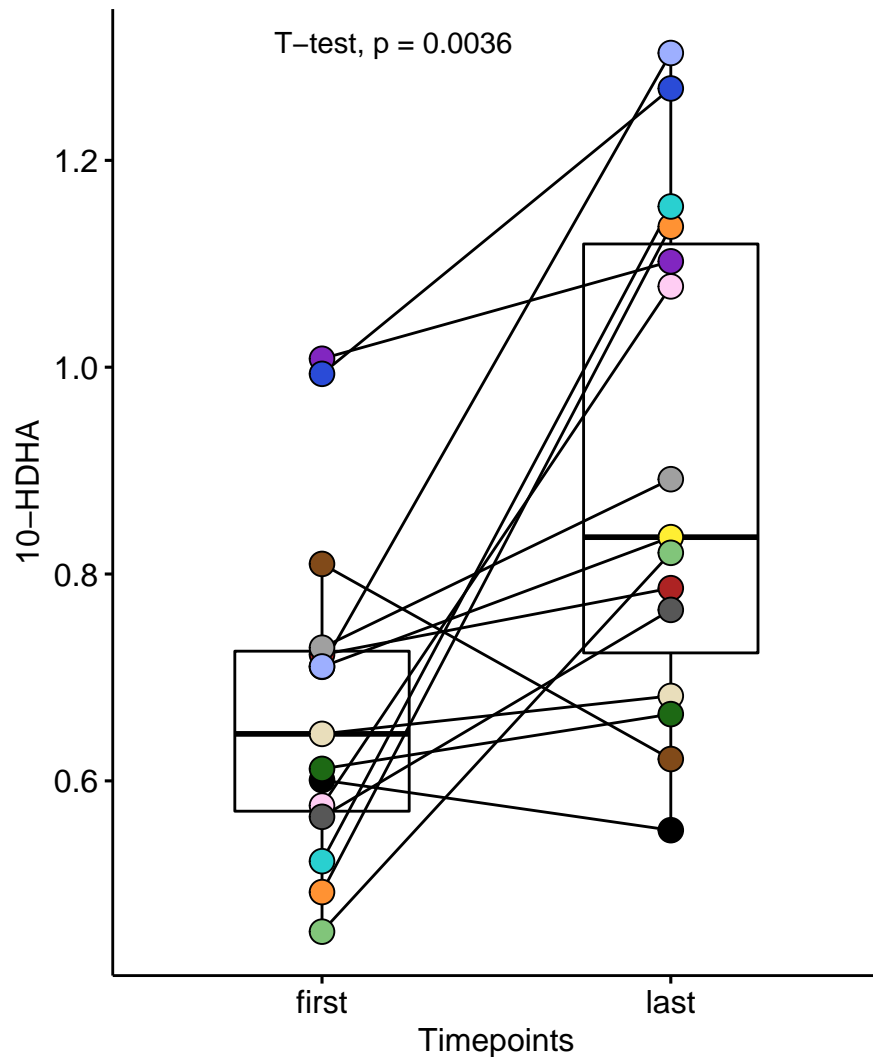

10-HDHA

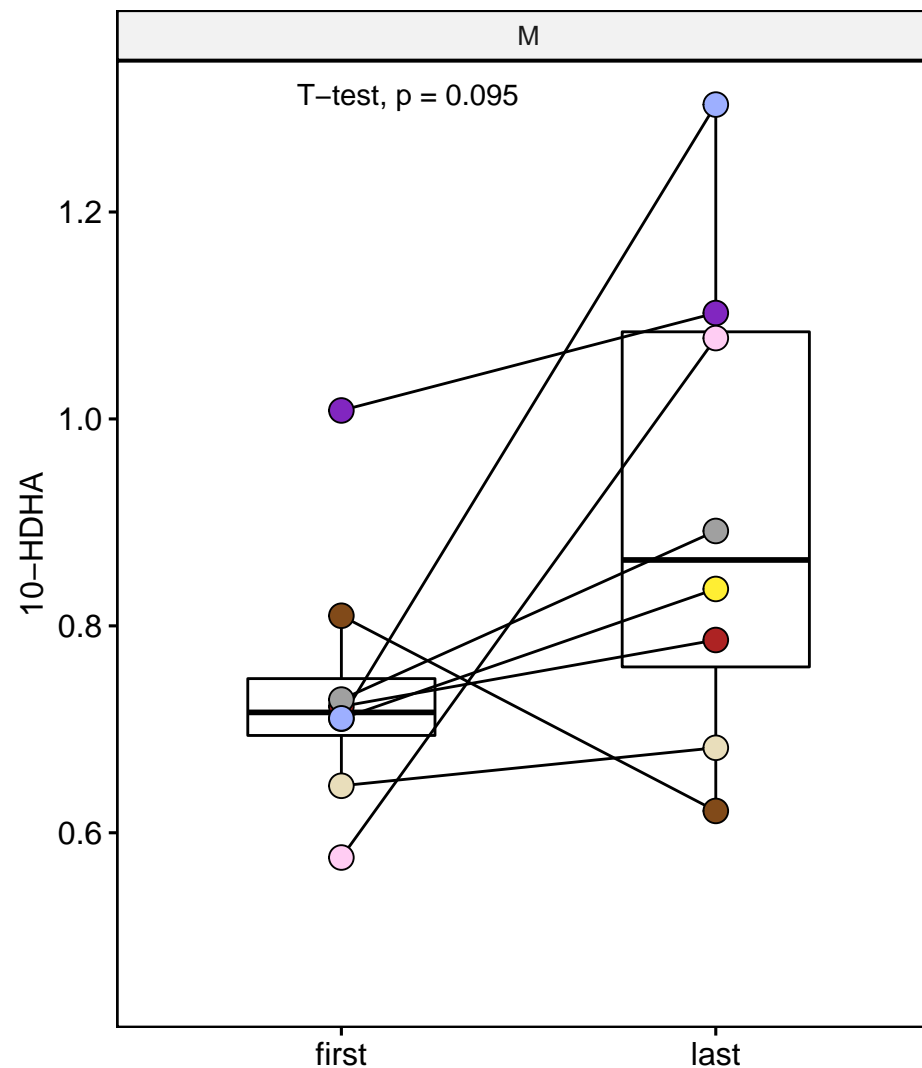

F

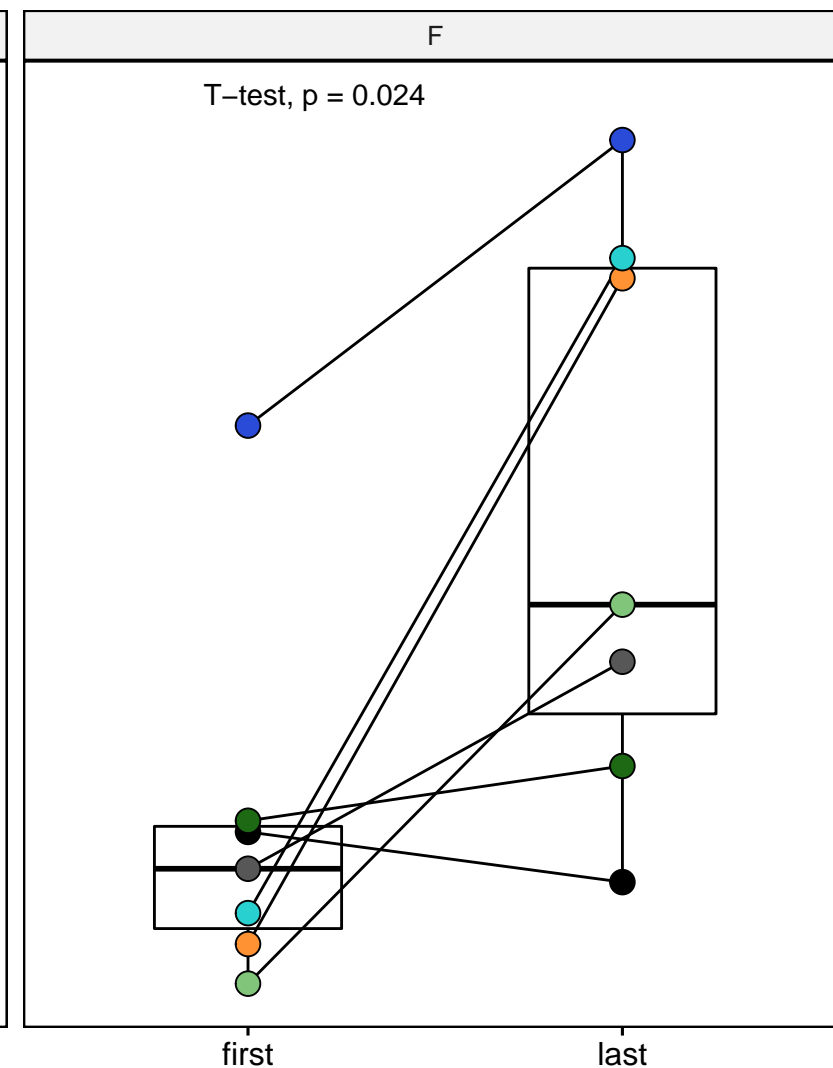

PatID

|                |                 |                |                |                |
|----------------|-----------------|----------------|----------------|----------------|
| ● 11_F68_8days | ● 18_F52_11days | ● 25_M87_3days | ● 30_M49_5days | ● 41_M70_6days |
| ● 12_F73_7days | ● 21_F53_9days  | ● 27_M71_4days | ● 32_F69_3days | ● 44_M57_5days |
| ● 13_M74_4days | ● 22_M65_3days  | ● 28_F53_6days | ● 40_F69_4days | ● 6_M79_8days  |

all patients (M+F)

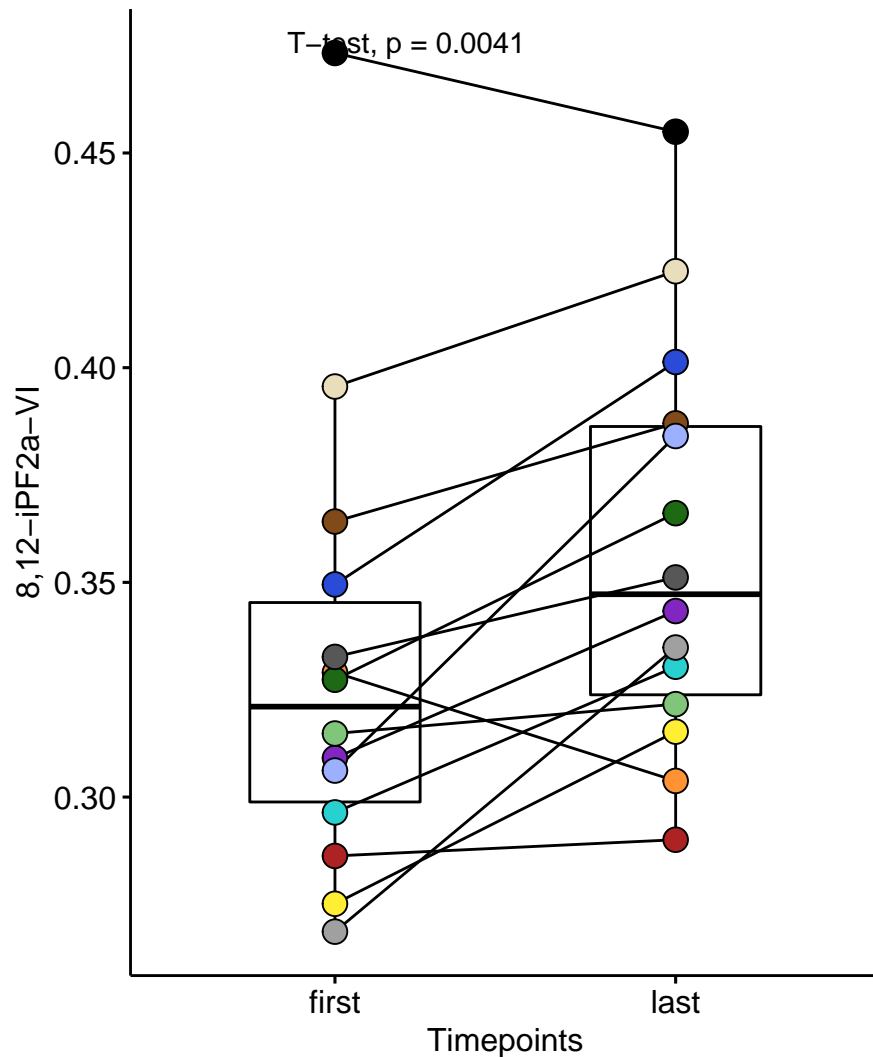

8,12-iPF2a-VI

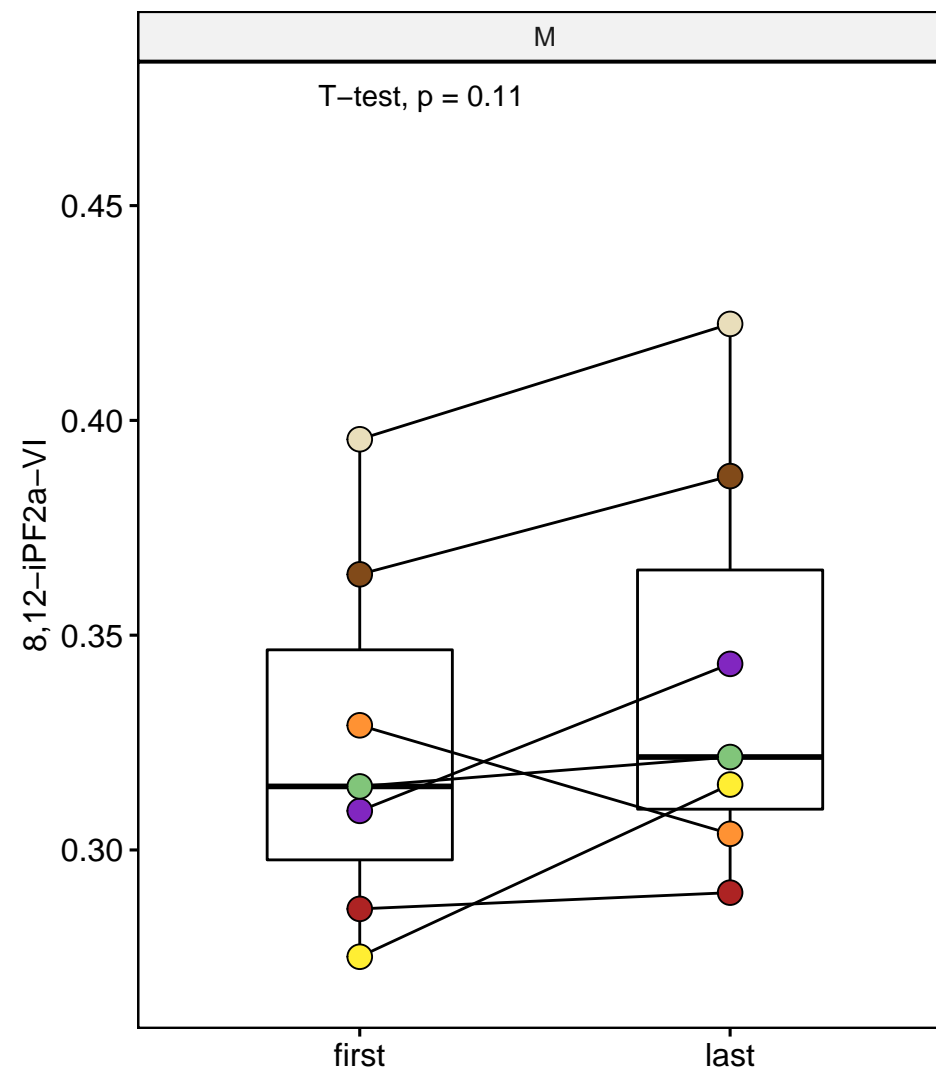

F

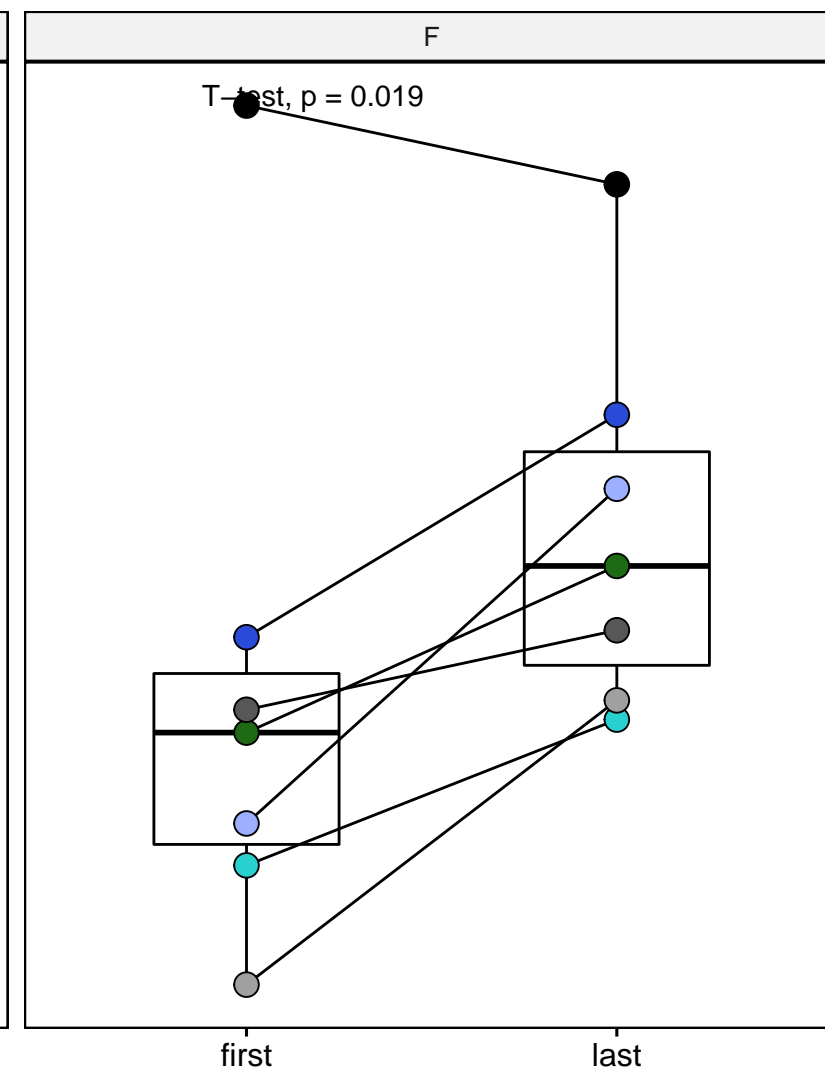

PatID

|                |                 |                |                |                |
|----------------|-----------------|----------------|----------------|----------------|
| ● 11_F68_8days | ● 18_F52_11days | ● 27_M71_4days | ● 32_F69_3days | ● 44_M57_5days |
| ● 12_F73_7days | ● 21_F53_9days  | ● 28_F53_6days | ● 40_F69_4days | ● 6_M79_8days  |
| ● 13_M74_4days | ● 25_M87_3days  | ● 30_M49_5days | ● 41_M70_6days |                |

all patients (M+F)

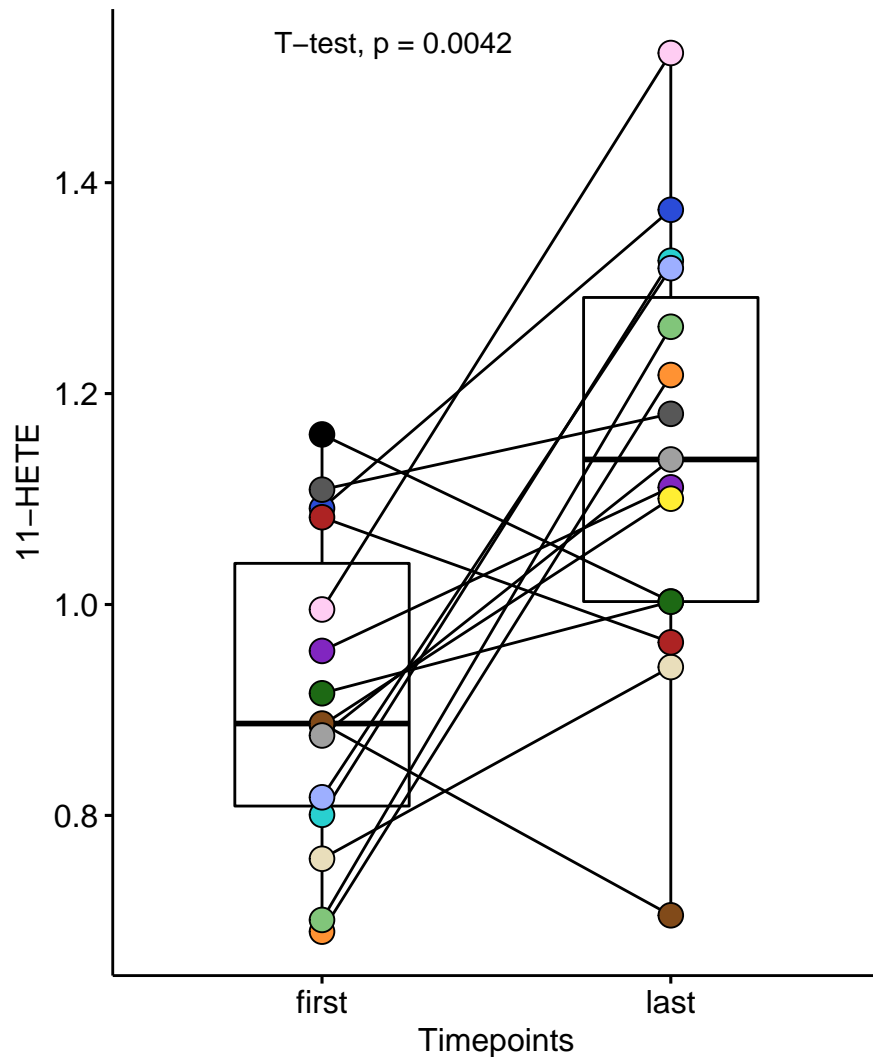

11-HETE

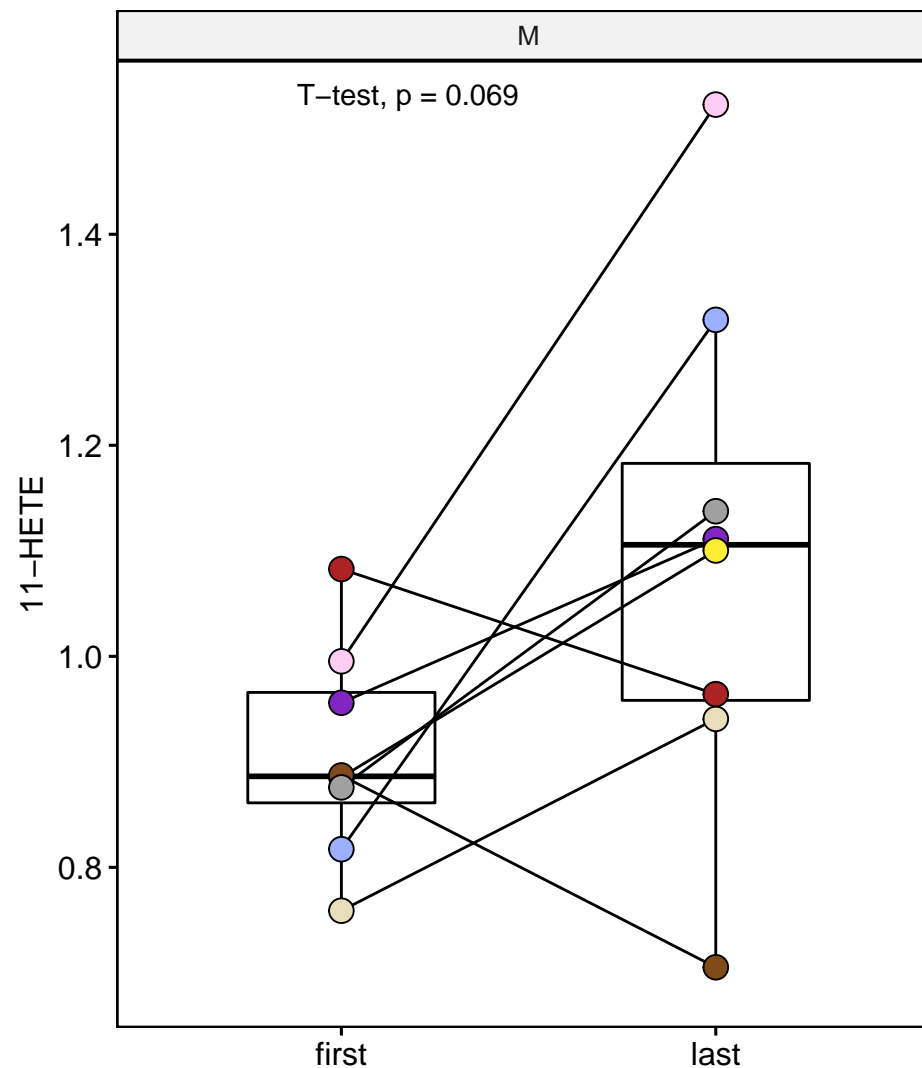

F

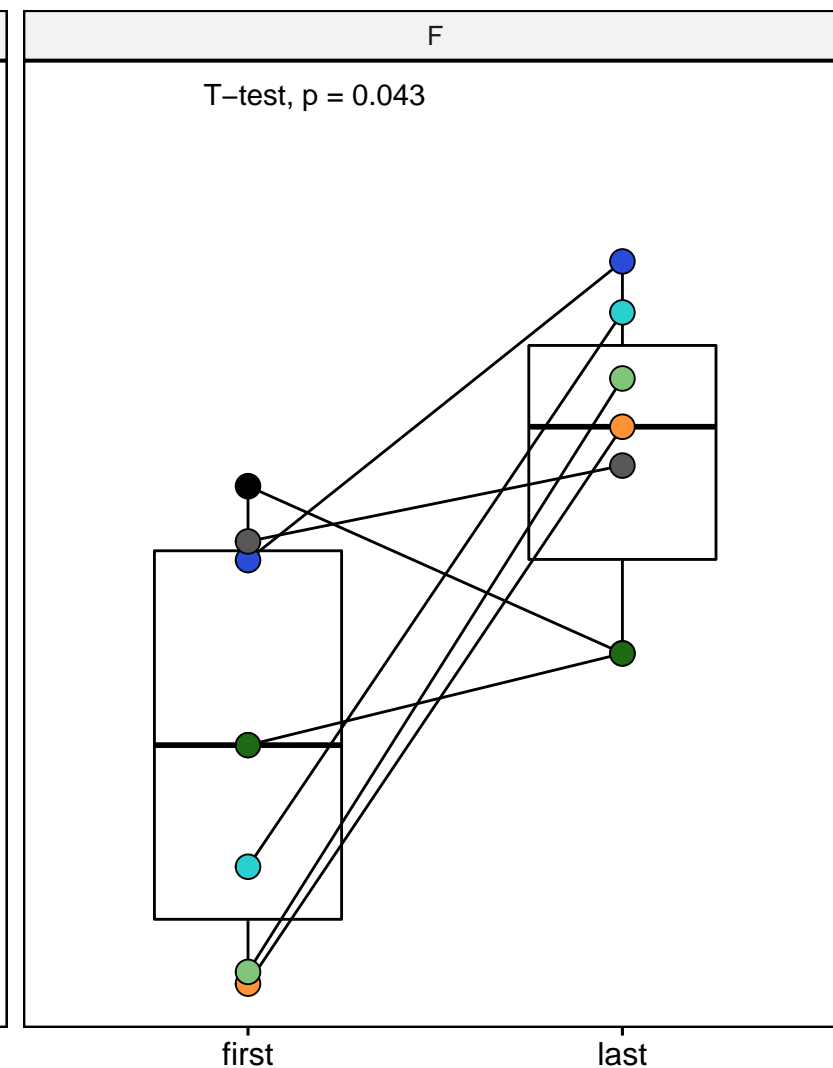

PatID

|                |                 |                |                |                |
|----------------|-----------------|----------------|----------------|----------------|
| ● 11_F68_8days | ● 18_F52_11days | ● 25_M87_3days | ● 30_M49_5days | ● 41_M70_6days |
| ● 12_F73_7days | ● 21_F53_9days  | ● 27_M71_4days | ● 32_F69_3days | ● 44_M57_5days |
| ● 13_M74_4days | ● 22_M65_3days  | ● 28_F53_6days | ● 40_F69_4days | ● 6_M79_8days  |

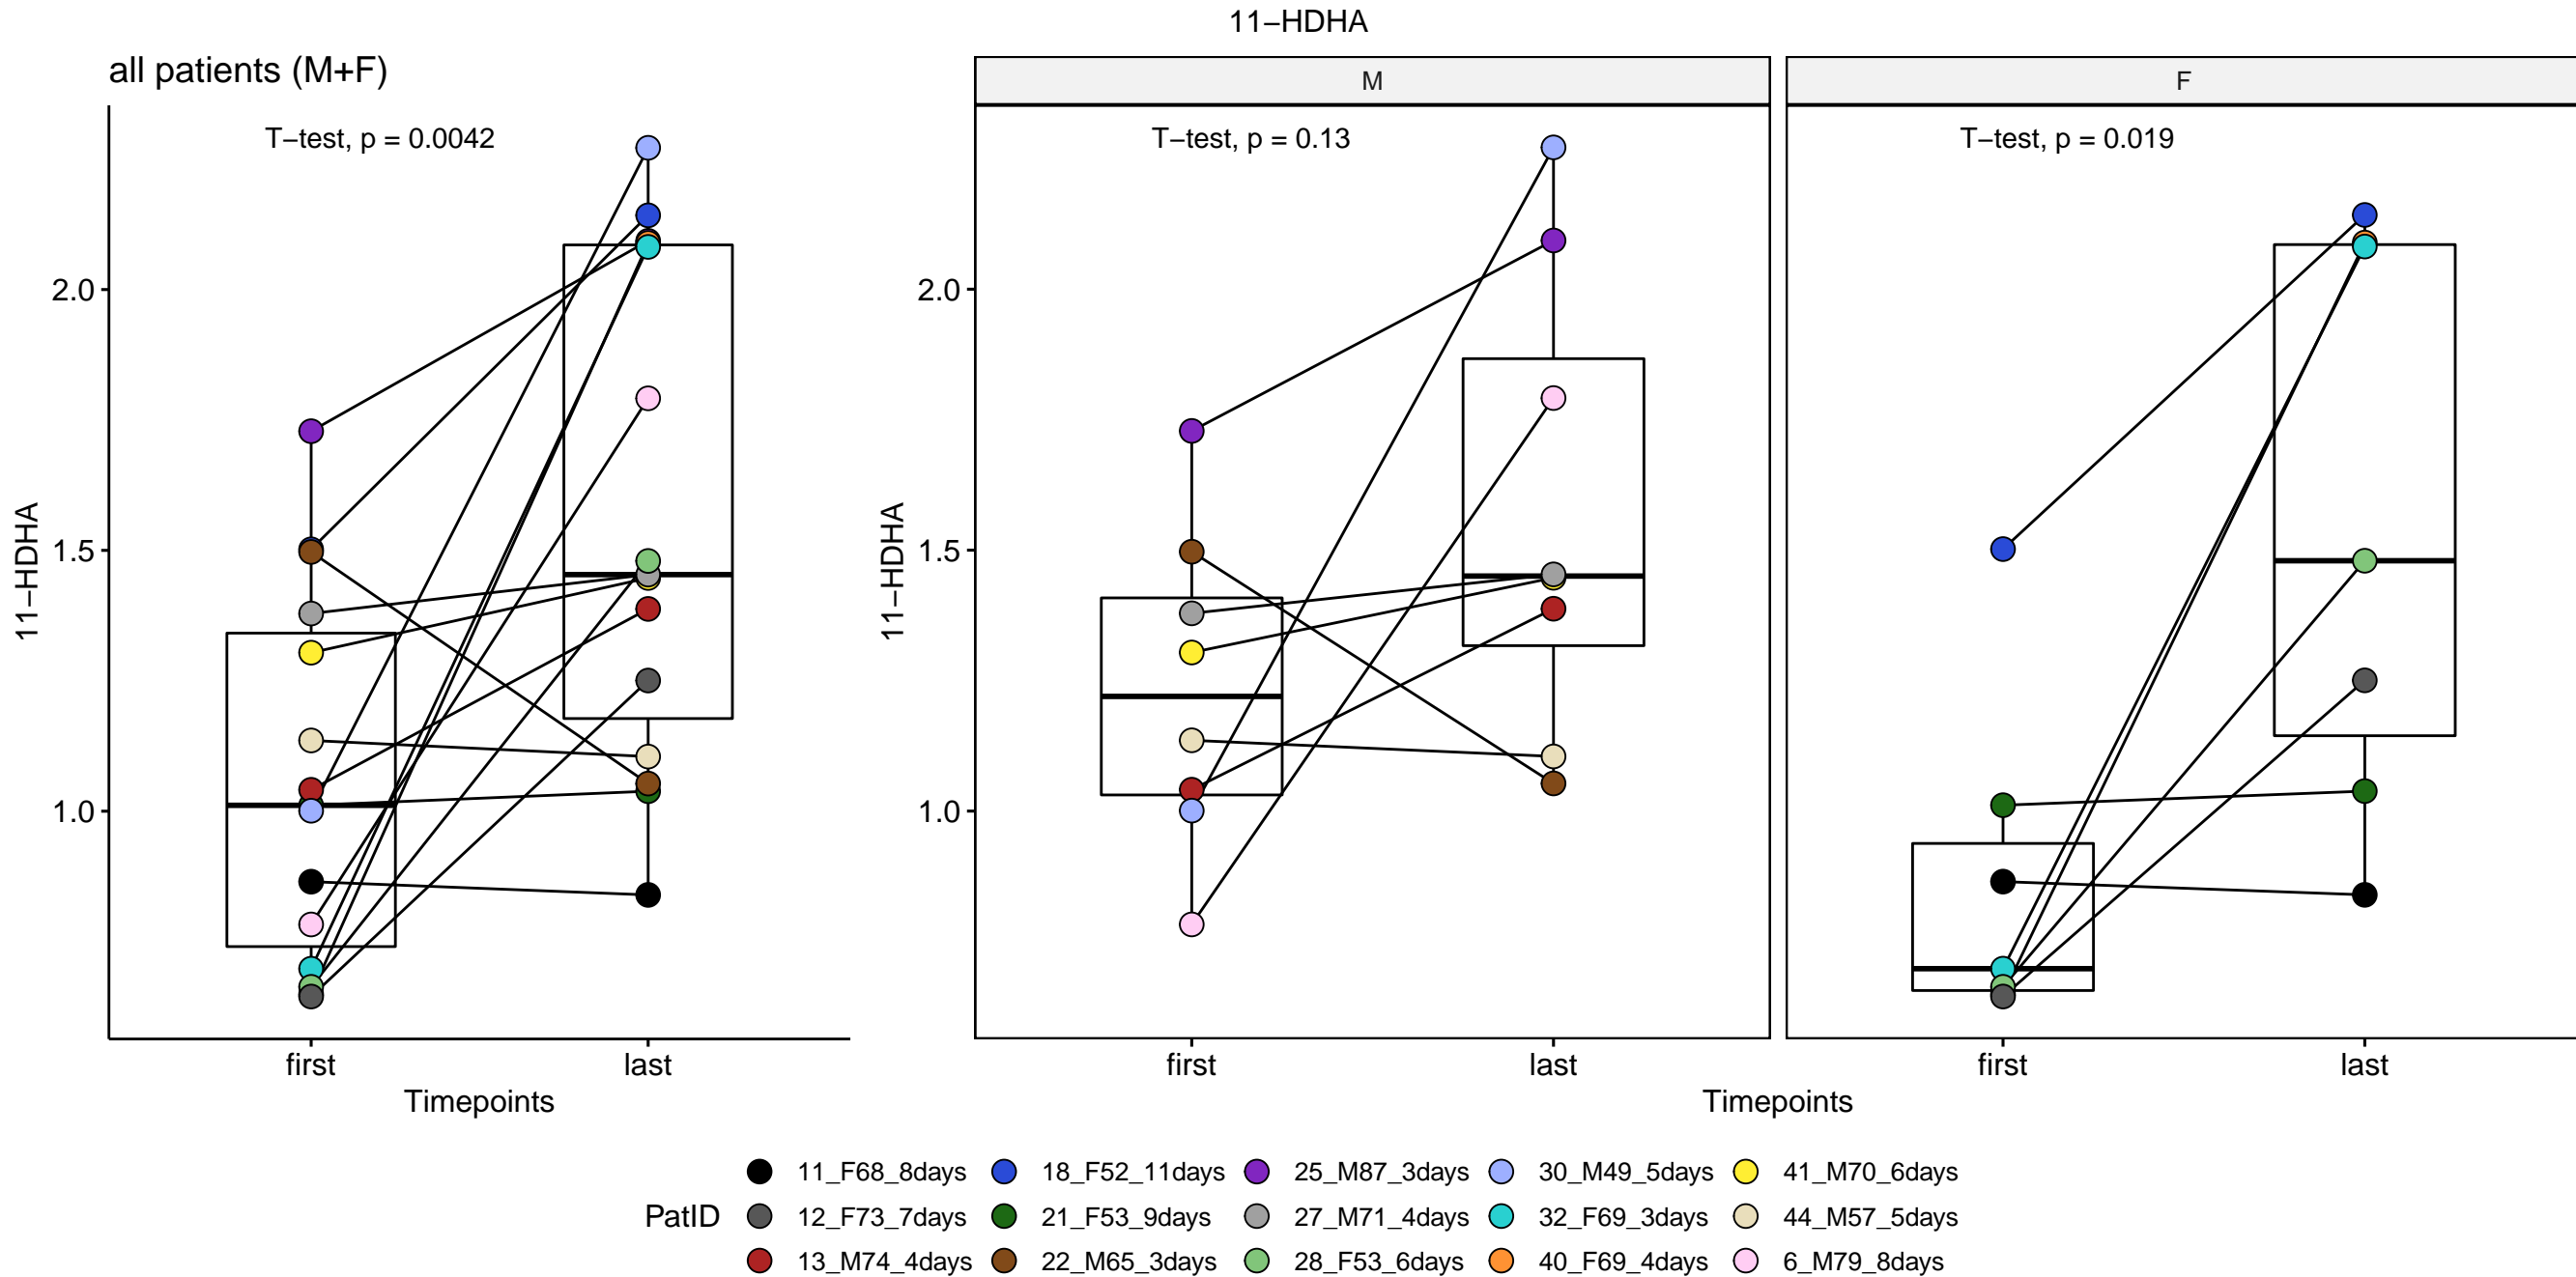



all patients (M+F)

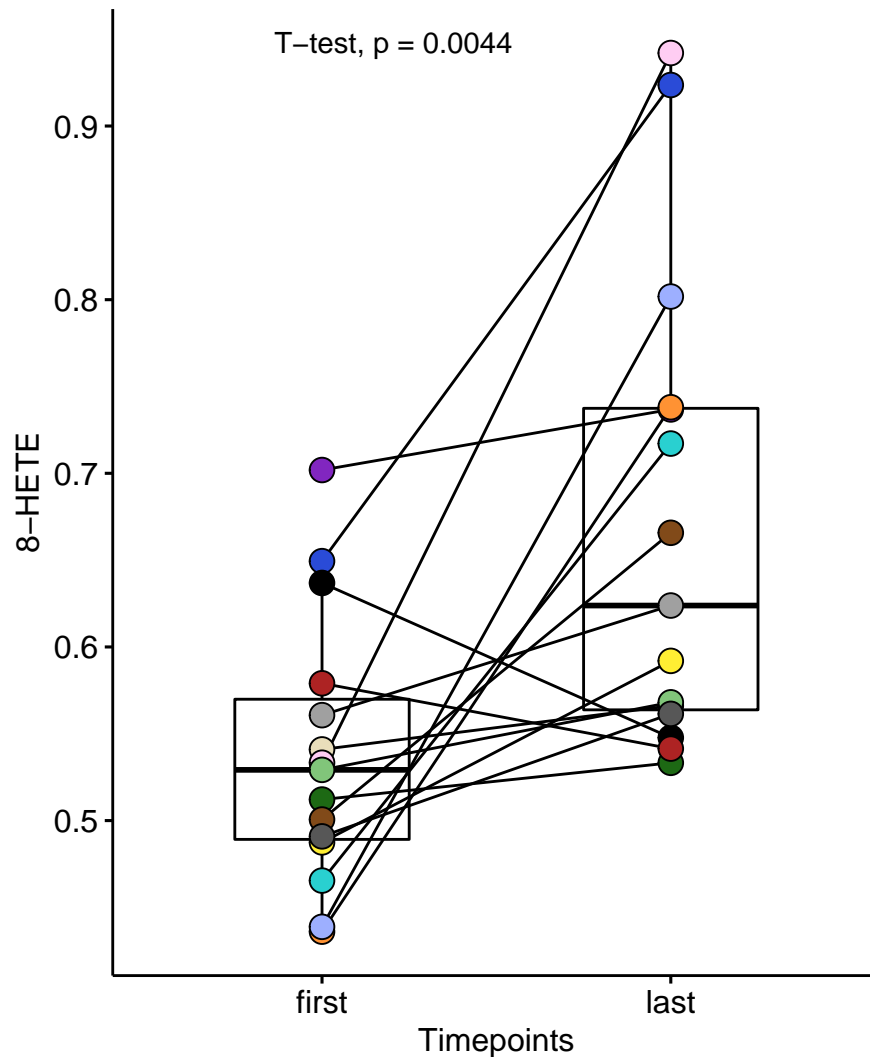

8-HETE

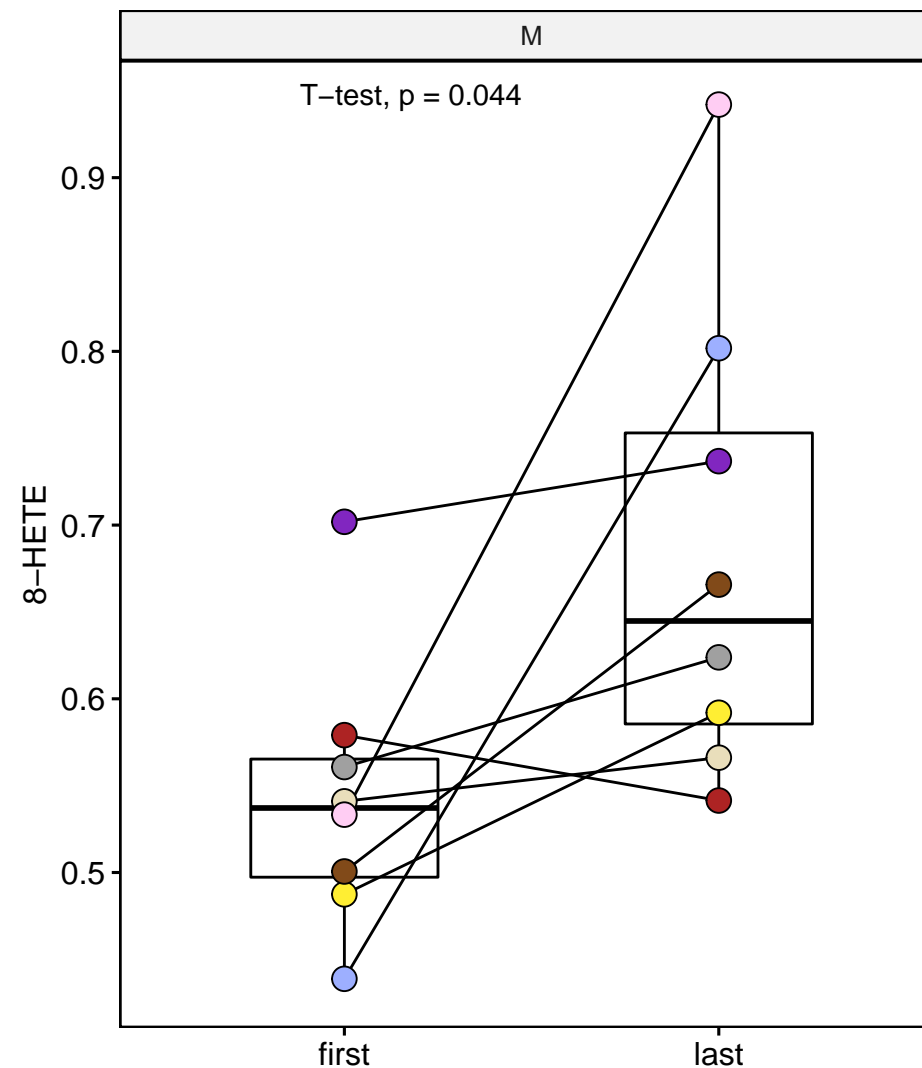

F

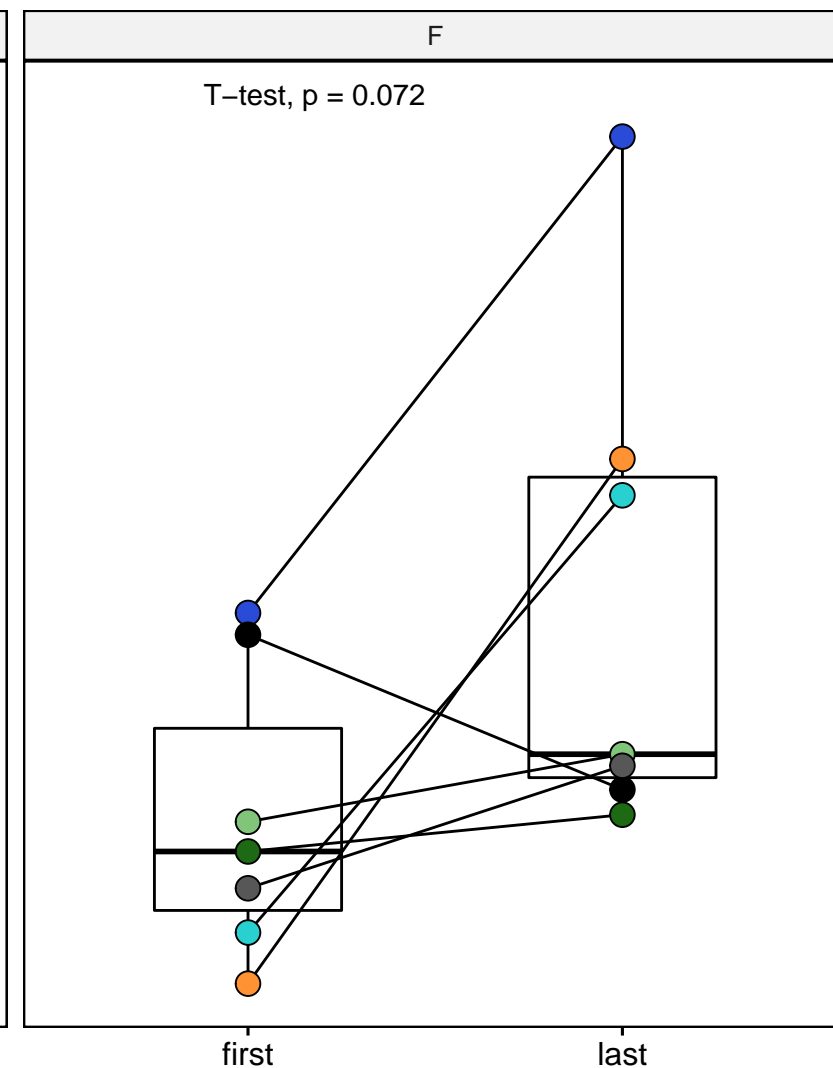

PatID

|                |                 |                |                |                |
|----------------|-----------------|----------------|----------------|----------------|
| ● 11_F68_8days | ● 18_F52_11days | ● 25_M87_3days | ● 30_M49_5days | ● 41_M70_6days |
| ● 12_F73_7days | ● 21_F53_9days  | ● 27_M71_4days | ● 32_F69_3days | ● 44_M57_5days |
| ● 13_M74_4days | ● 22_M65_3days  | ● 28_F53_6days | ● 40_F69_4days | ● 6_M79_8days  |

all patients (M+F)

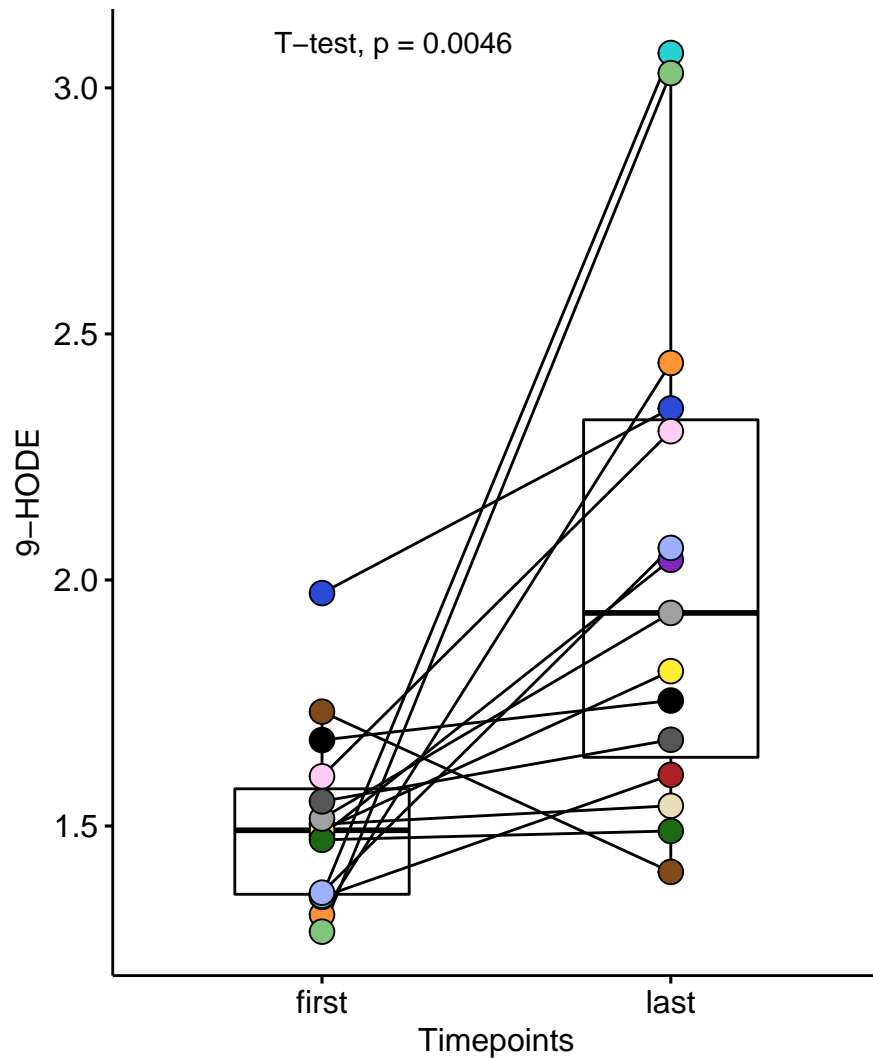

9-HODE

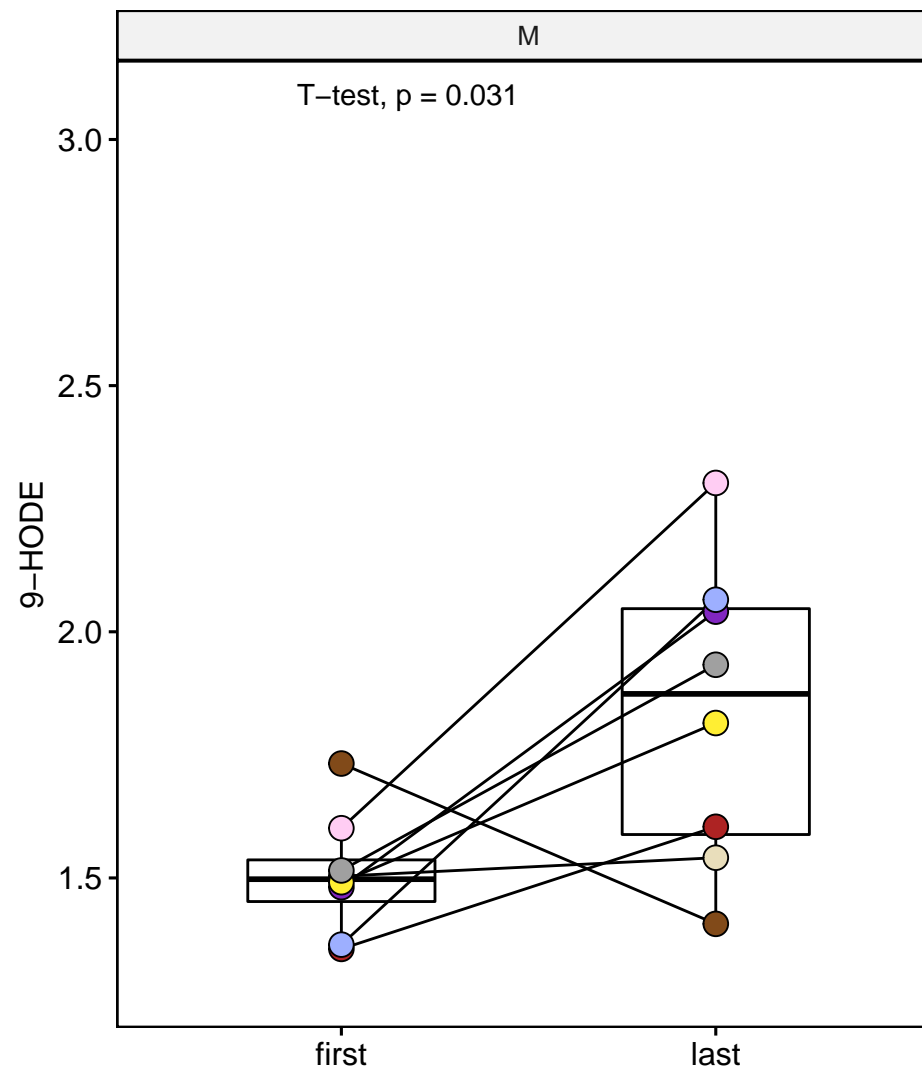

F

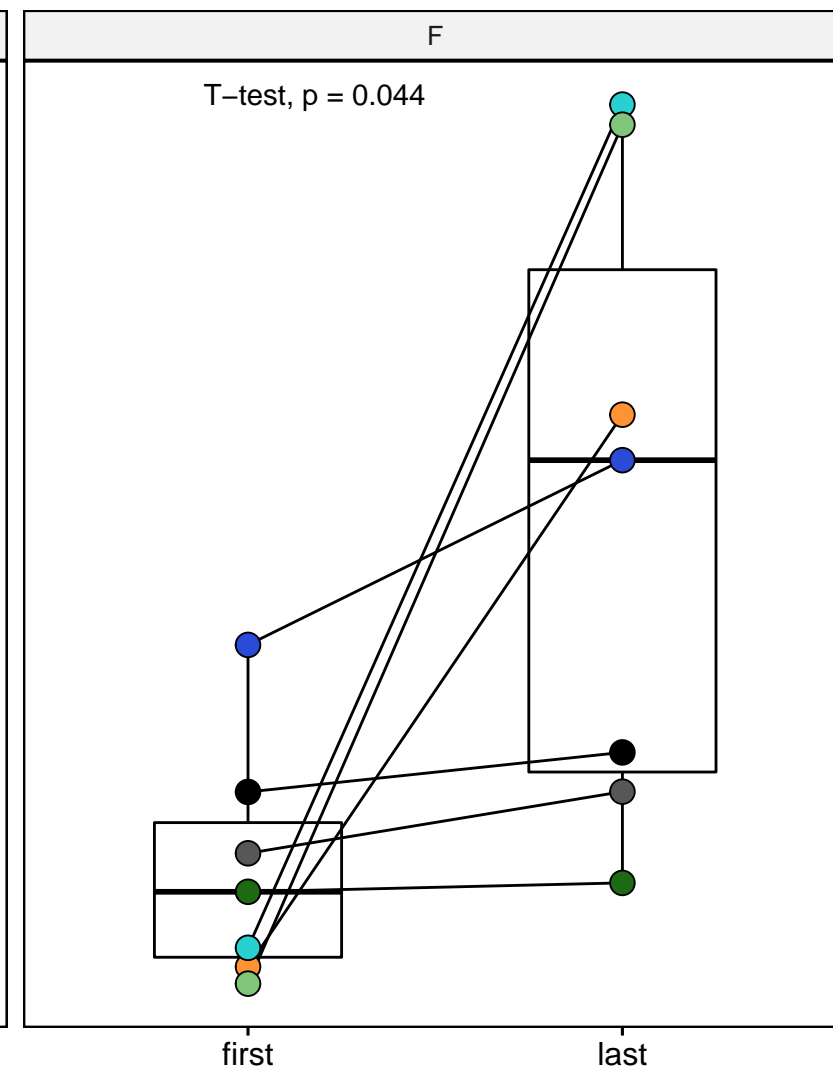

PatID

|                |                 |                |                |                |
|----------------|-----------------|----------------|----------------|----------------|
| ● 11_F68_8days | ● 18_F52_11days | ● 25_M87_3days | ● 30_M49_5days | ● 41_M70_6days |
| ● 12_F73_7days | ● 21_F53_9days  | ● 27_M71_4days | ● 32_F69_3days | ● 44_M57_5days |
| ● 13_M74_4days | ● 22_M65_3days  | ● 28_F53_6days | ● 40_F69_4days | ● 6_M79_8days  |

all patients (M+F)

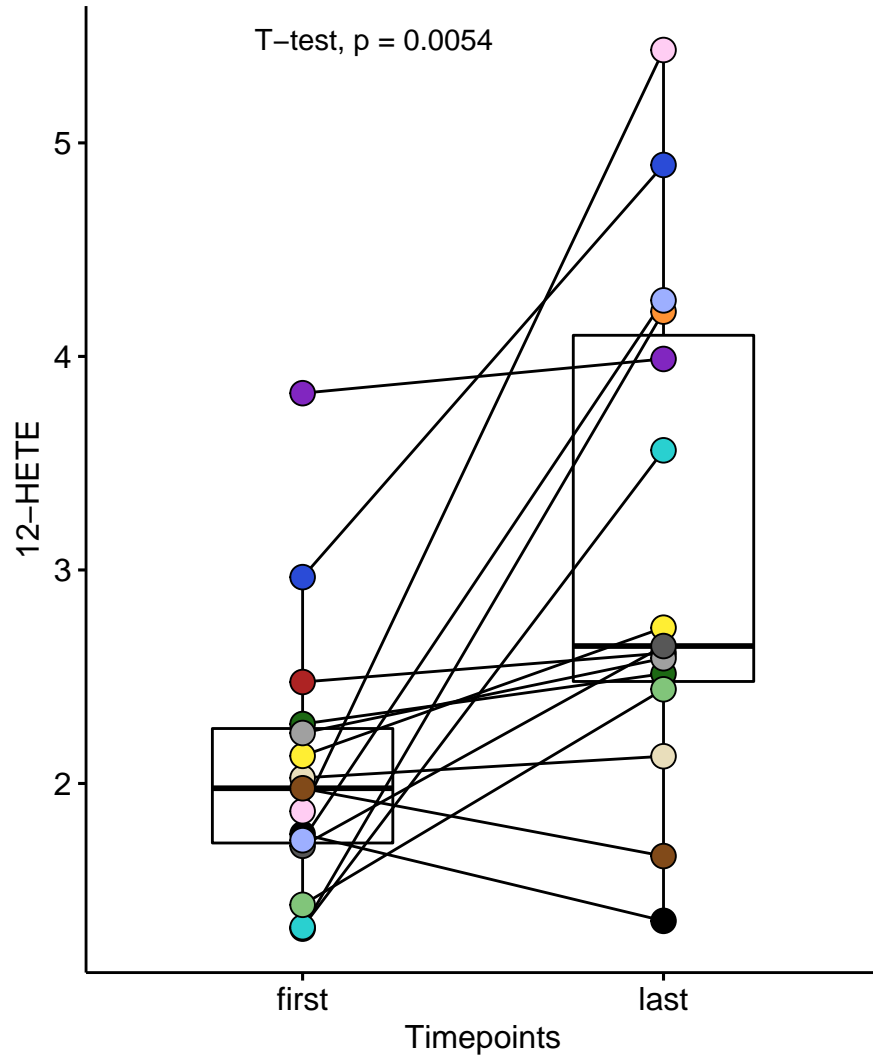

12-HETE

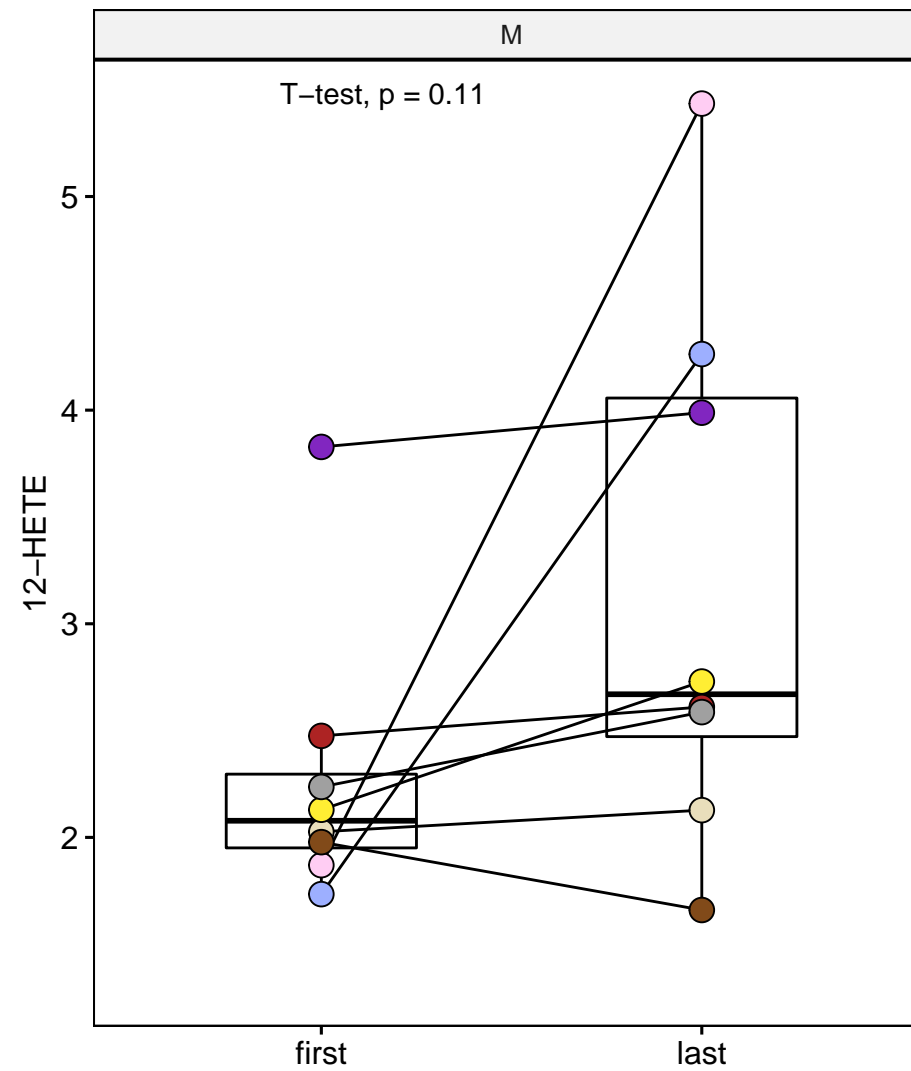

F

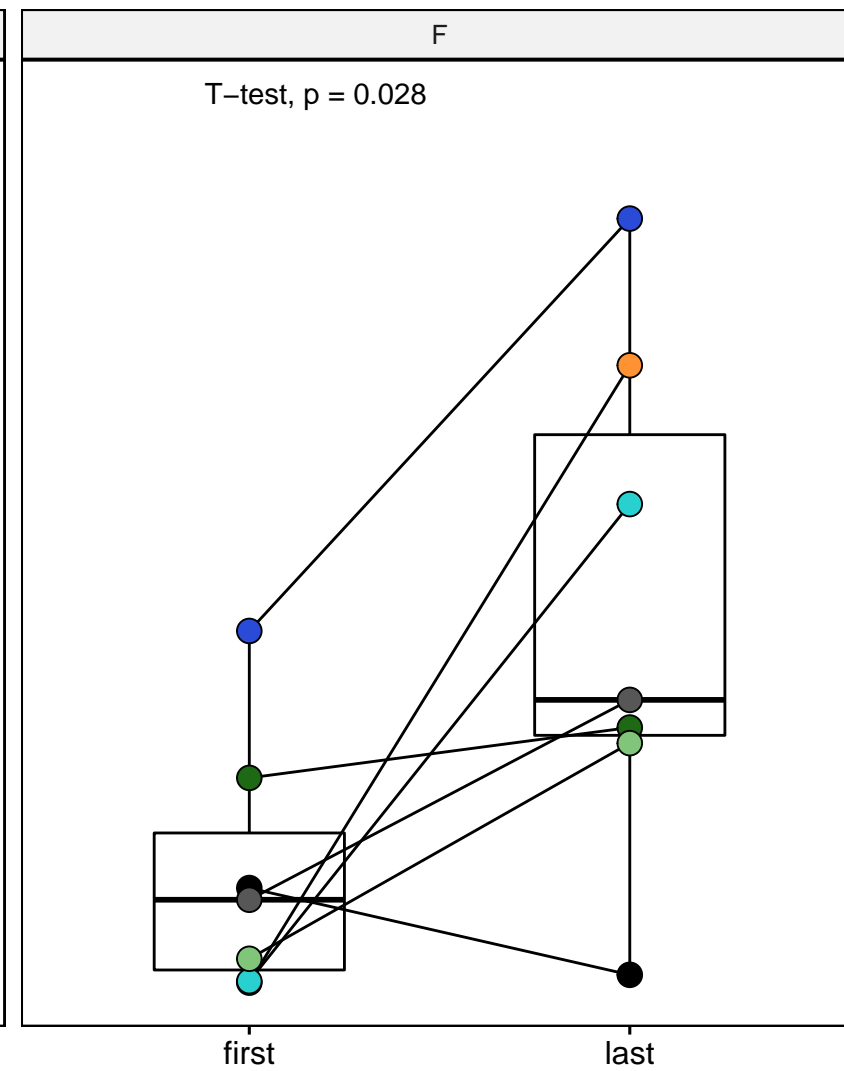

PatID

|                |                 |                |                |                |
|----------------|-----------------|----------------|----------------|----------------|
| ● 11_F68_8days | ● 18_F52_11days | ● 25_M87_3days | ● 30_M49_5days | ● 41_M70_6days |
| ● 12_F73_7days | ● 21_F53_9days  | ● 27_M71_4days | ● 32_F69_3days | ● 44_M57_5days |
| ● 13_M74_4days | ● 22_M65_3days  | ● 28_F53_6days | ● 40_F69_4days | ● 6_M79_8days  |

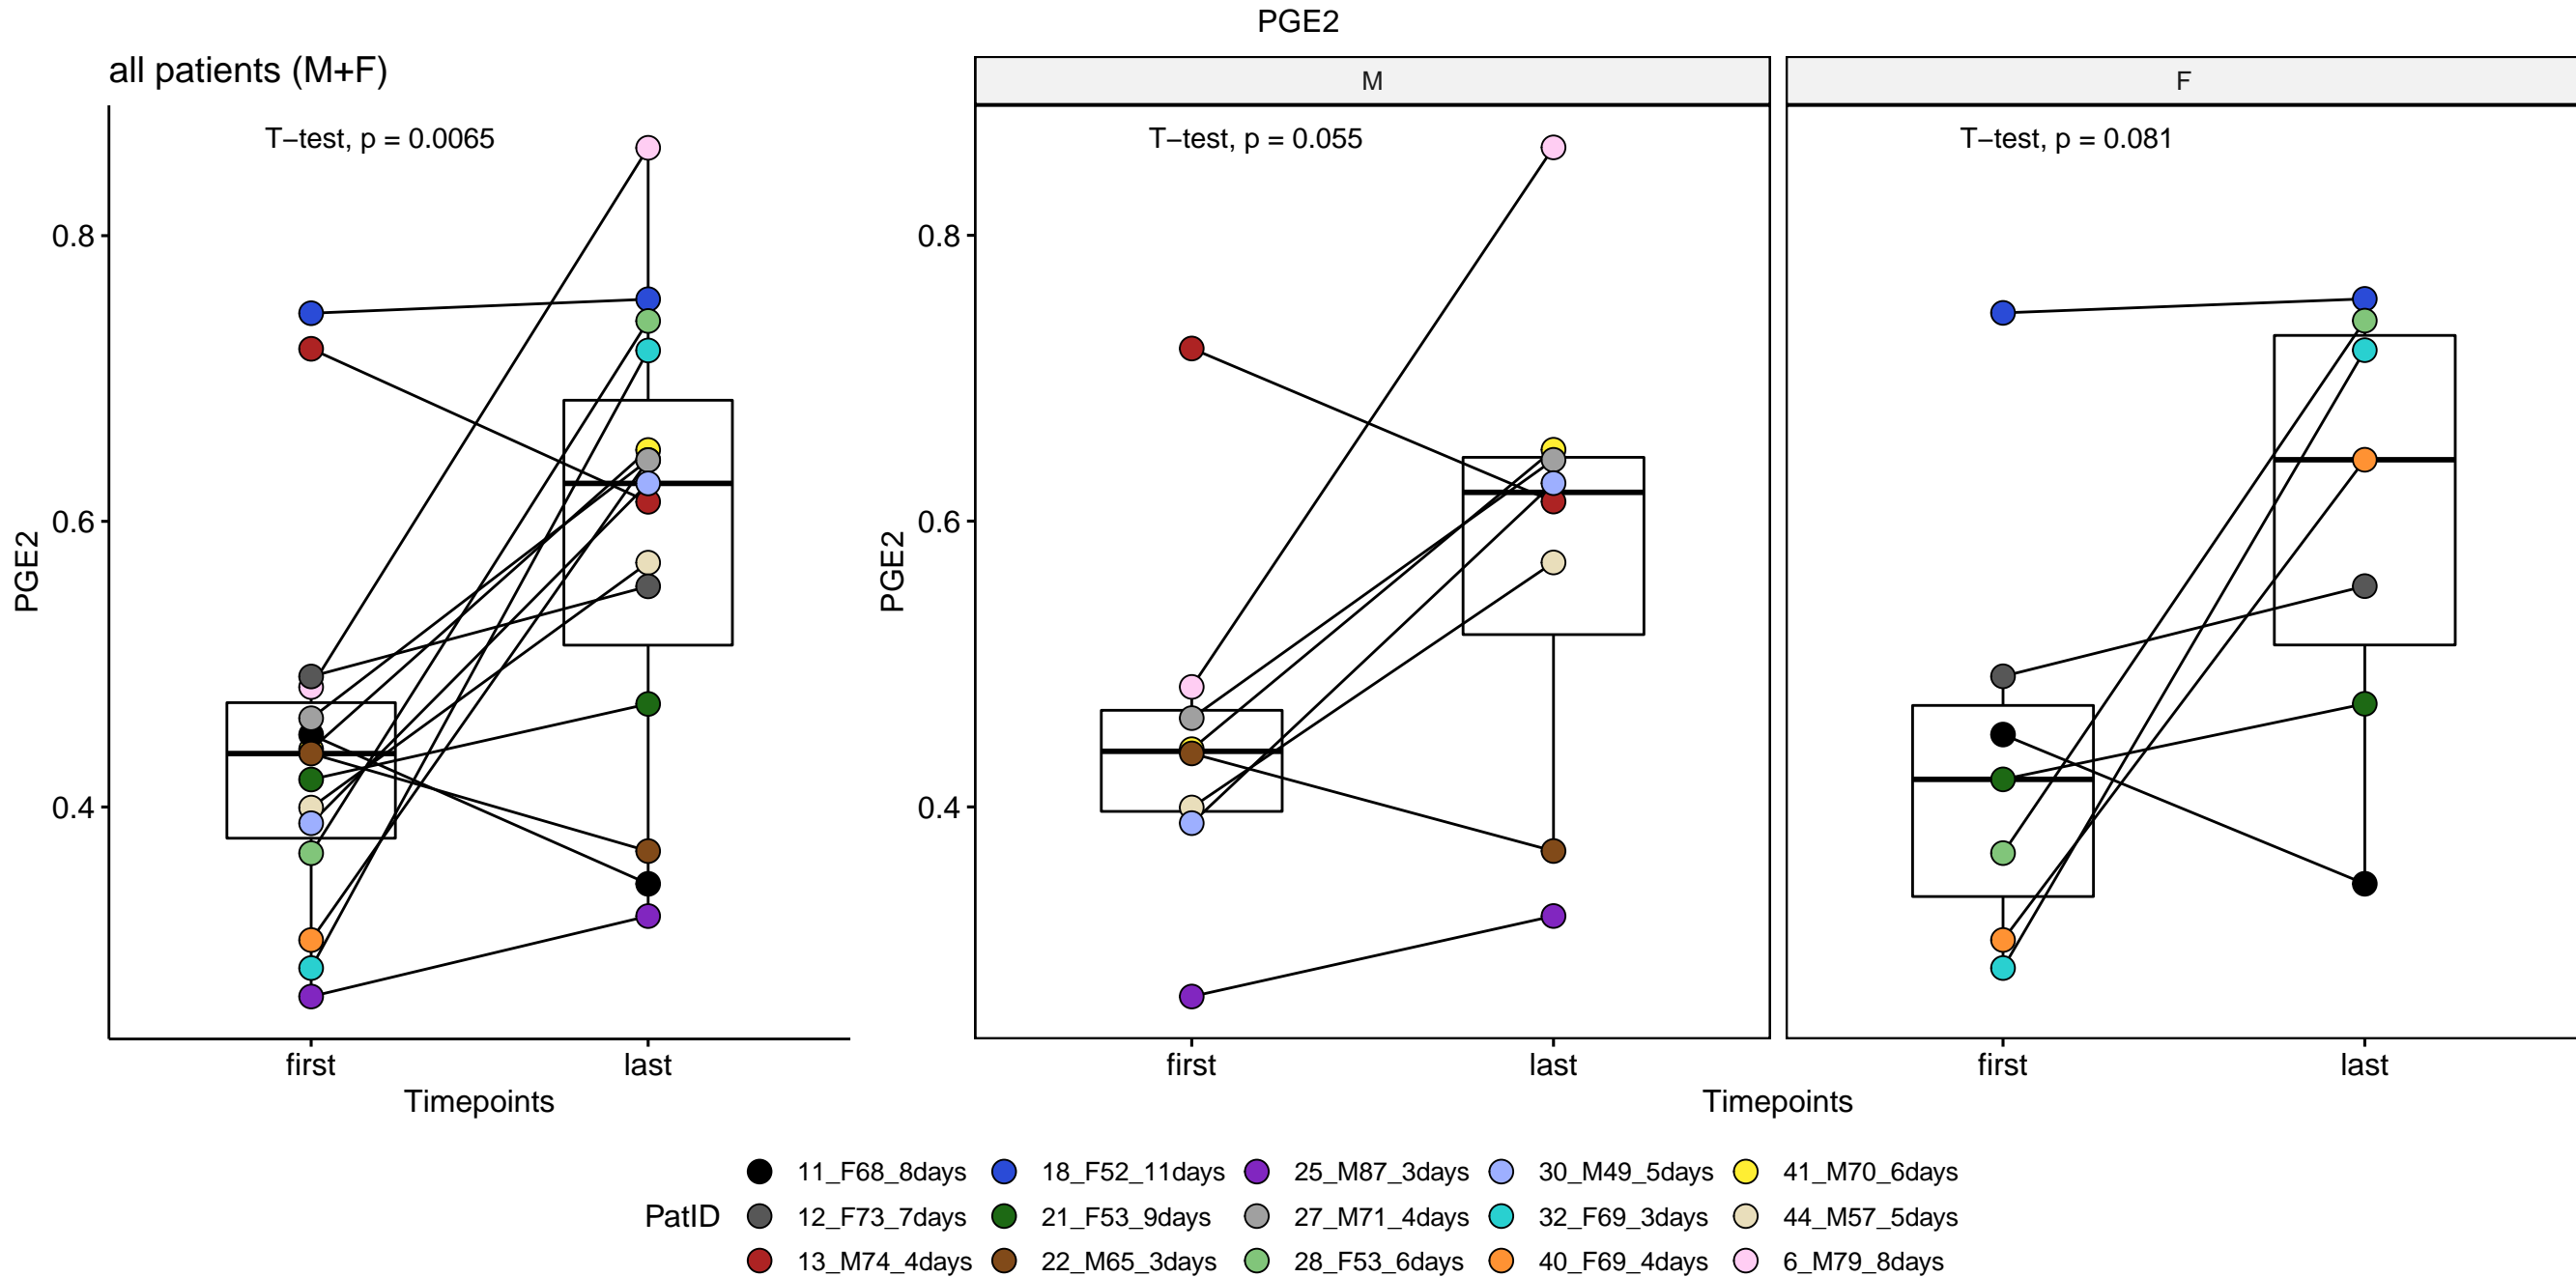

# 9-HOTrE

all patients (M+F)

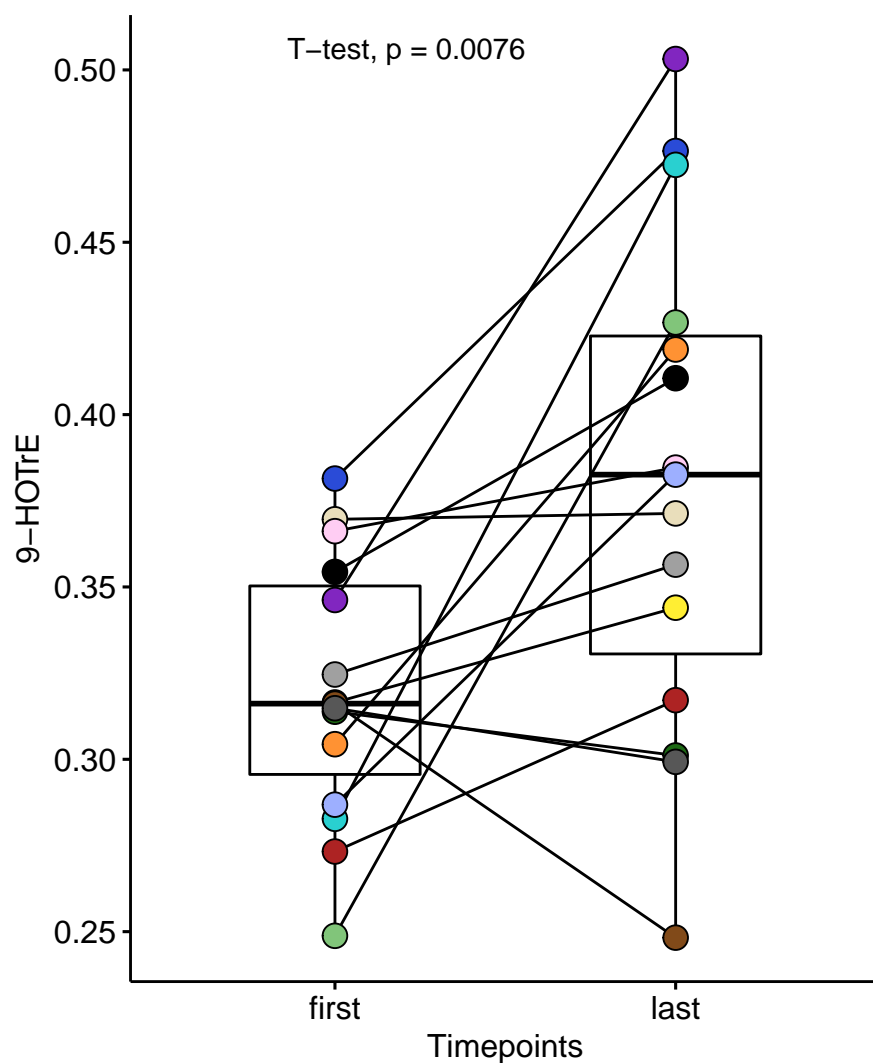

M

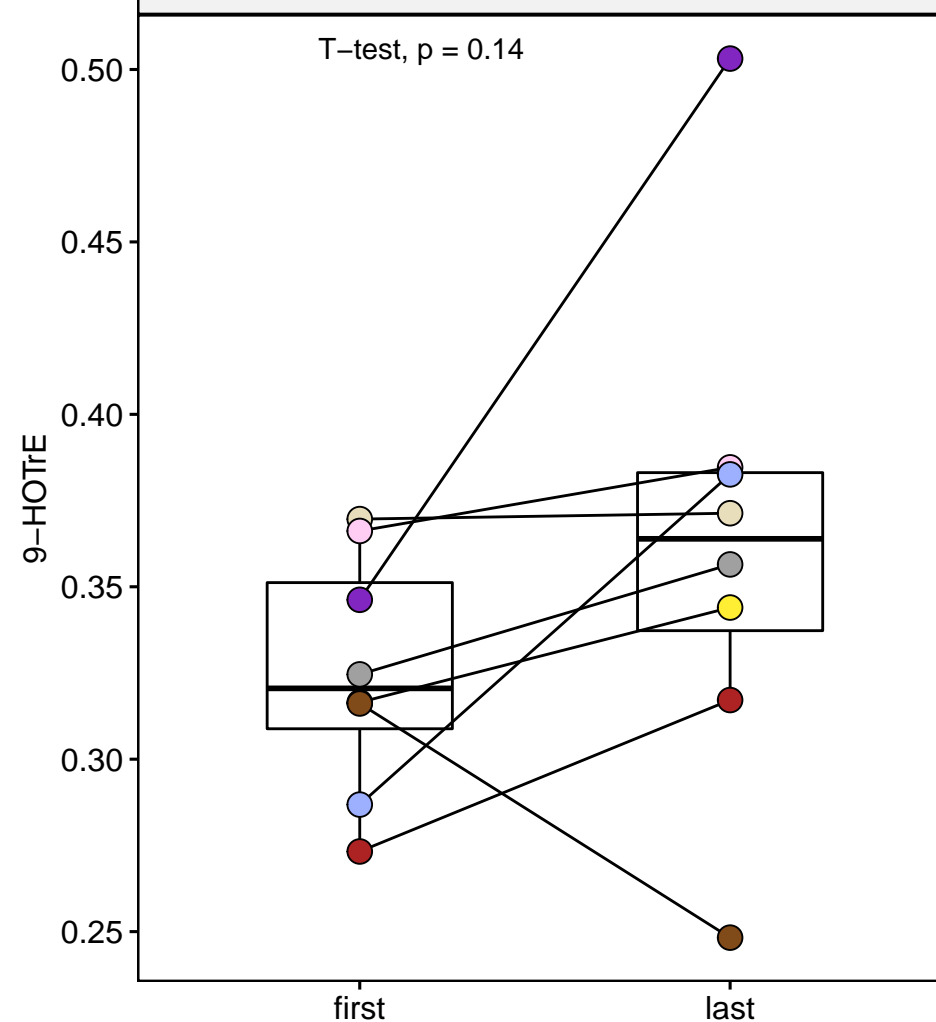

F

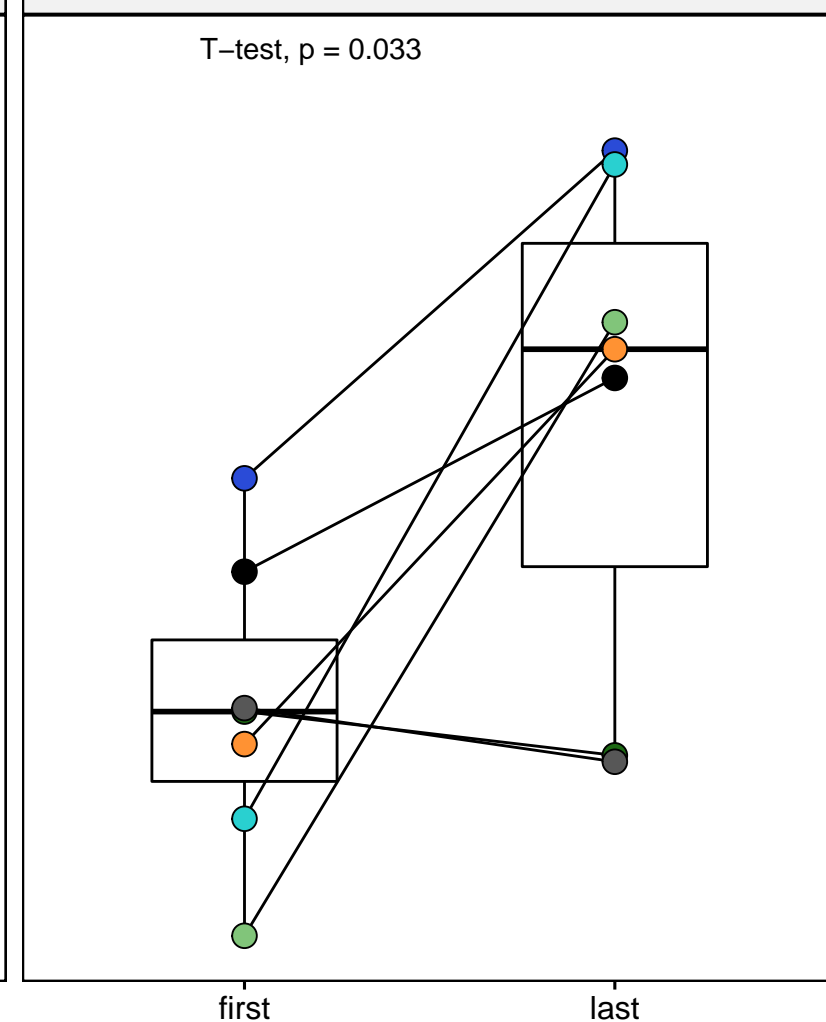

- PatID
- 11\_F68\_8days
  - 12\_F73\_7days
  - 13\_M74\_4days
  - 18\_F52\_11days
  - 21\_F53\_9days
  - 22\_M65\_3days
  - 25\_M87\_3days
  - 27\_M71\_4days
  - 28\_F53\_6days
  - 30\_M49\_5days
  - 32\_F69\_3days
  - 40\_F69\_4days
  - 41\_M70\_6days
  - 44\_M57\_5days
  - 6\_M79\_8days

# 9,10-DiHOME

all patients (M+F)

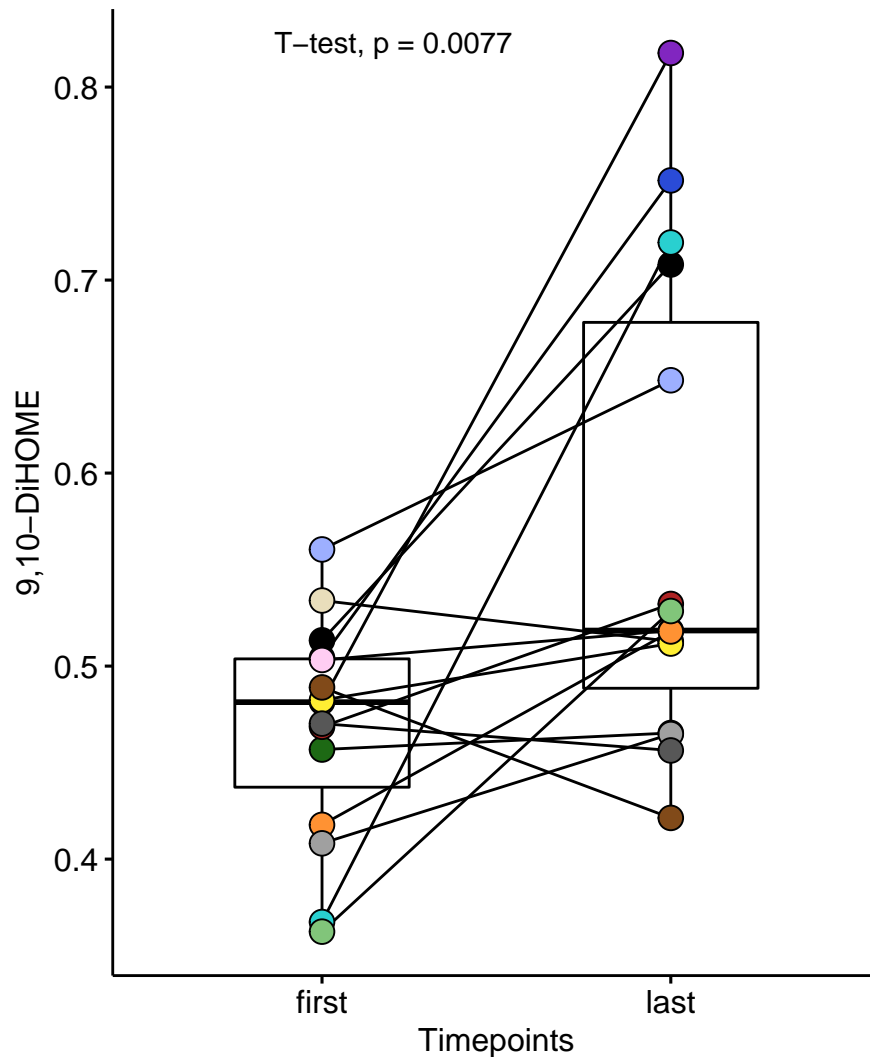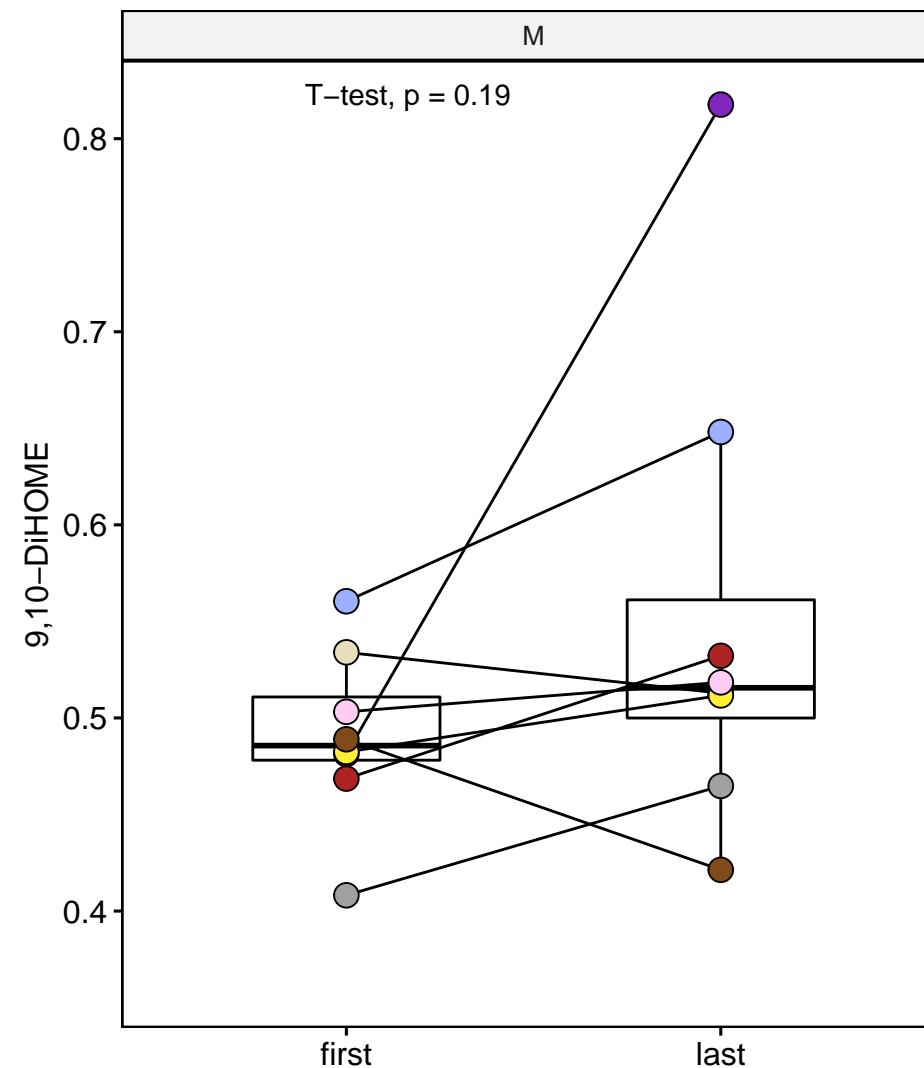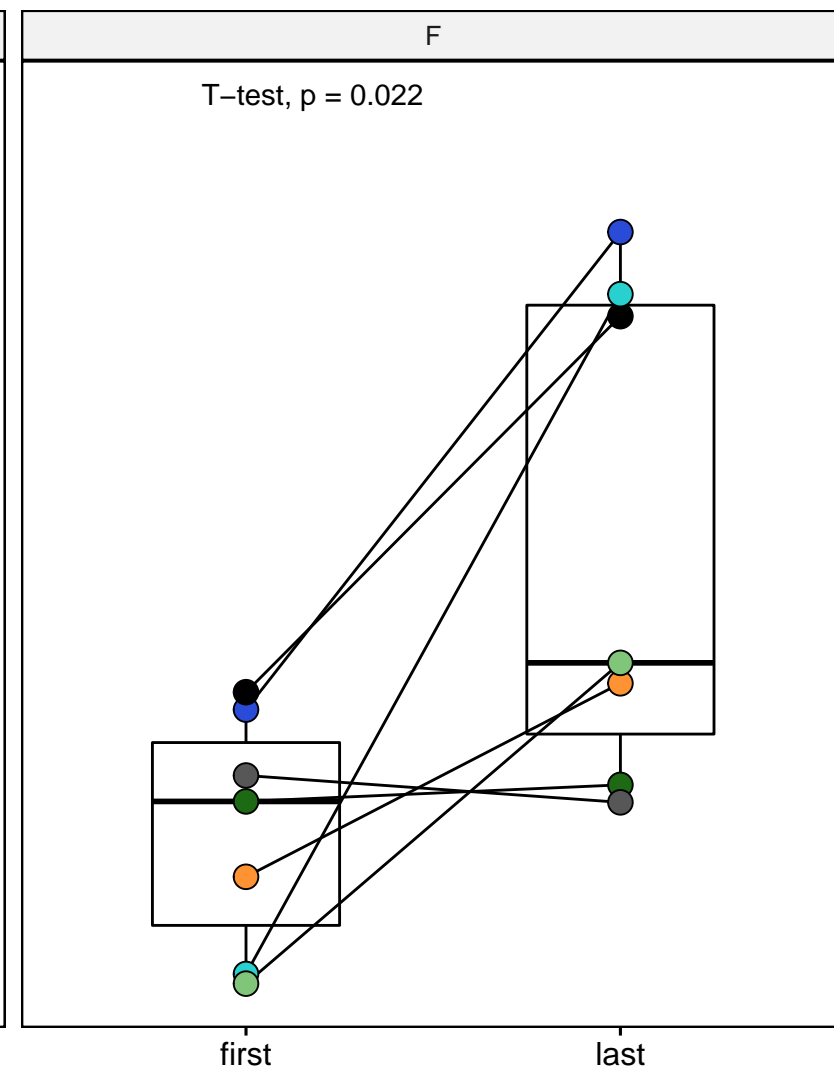

PatID

|                |                 |                |                |                |
|----------------|-----------------|----------------|----------------|----------------|
| ● 11_F68_8days | ● 18_F52_11days | ● 25_M87_3days | ● 30_M49_5days | ● 41_M70_6days |
| ● 12_F73_7days | ● 21_F53_9days  | ● 27_M71_4days | ● 32_F69_3days | ● 44_M57_5days |
| ● 13_M74_4days | ● 22_M65_3days  | ● 28_F53_6days | ● 40_F69_4days | ● 6_M79_8days  |

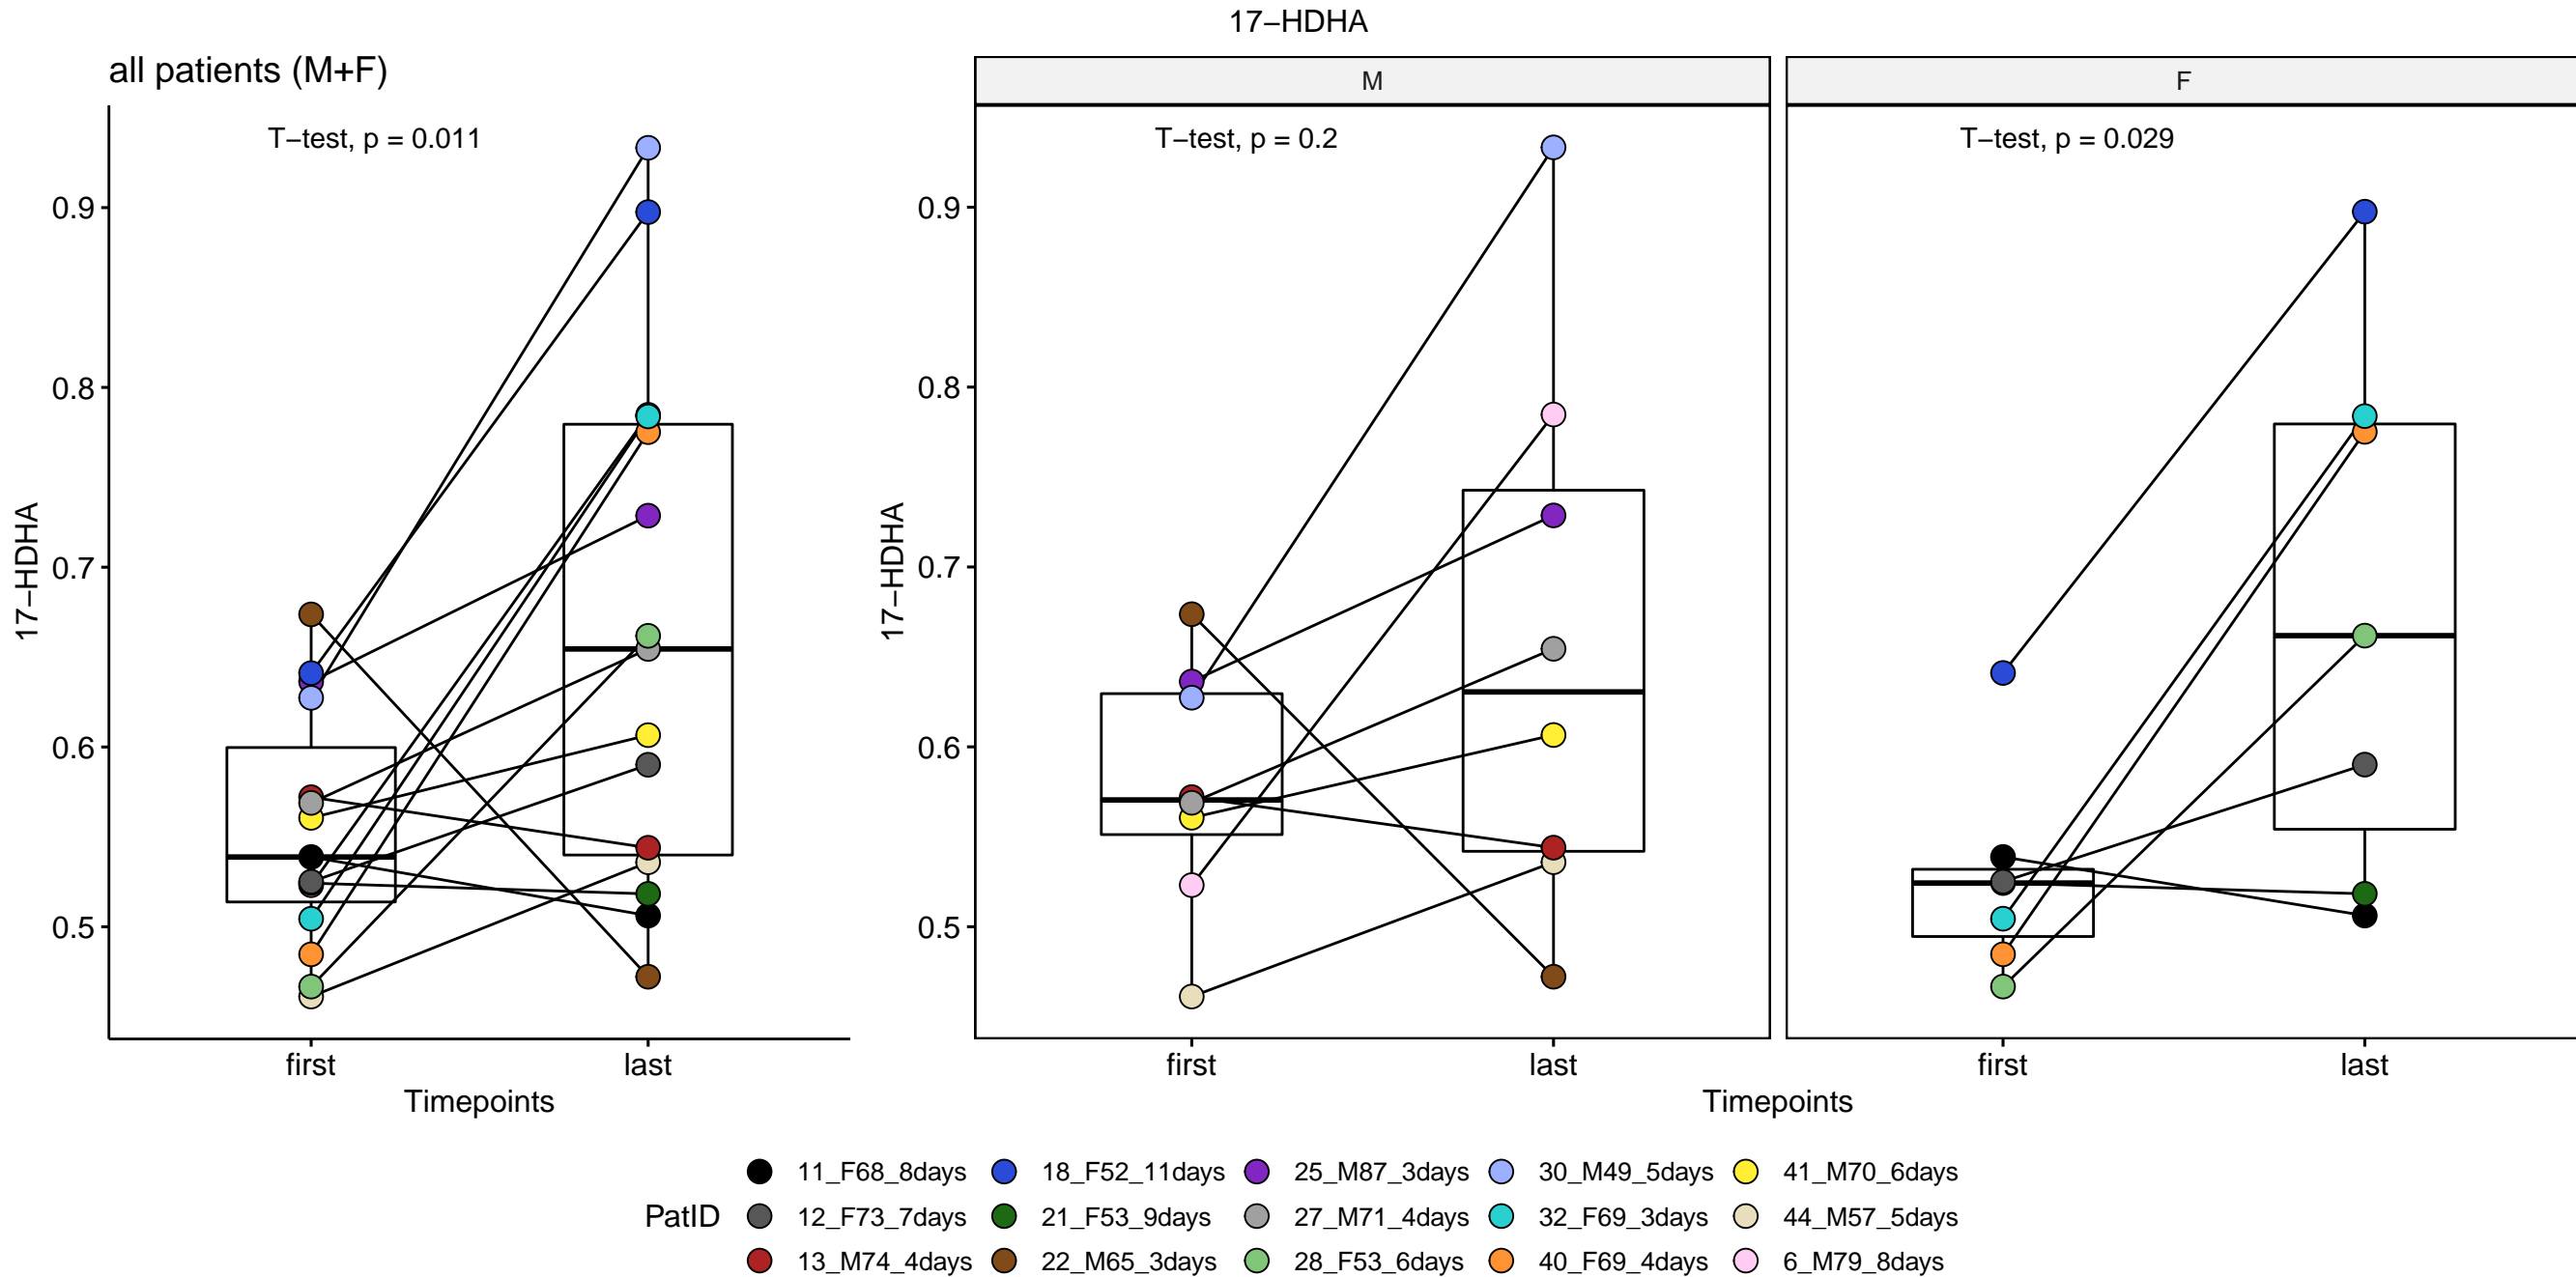

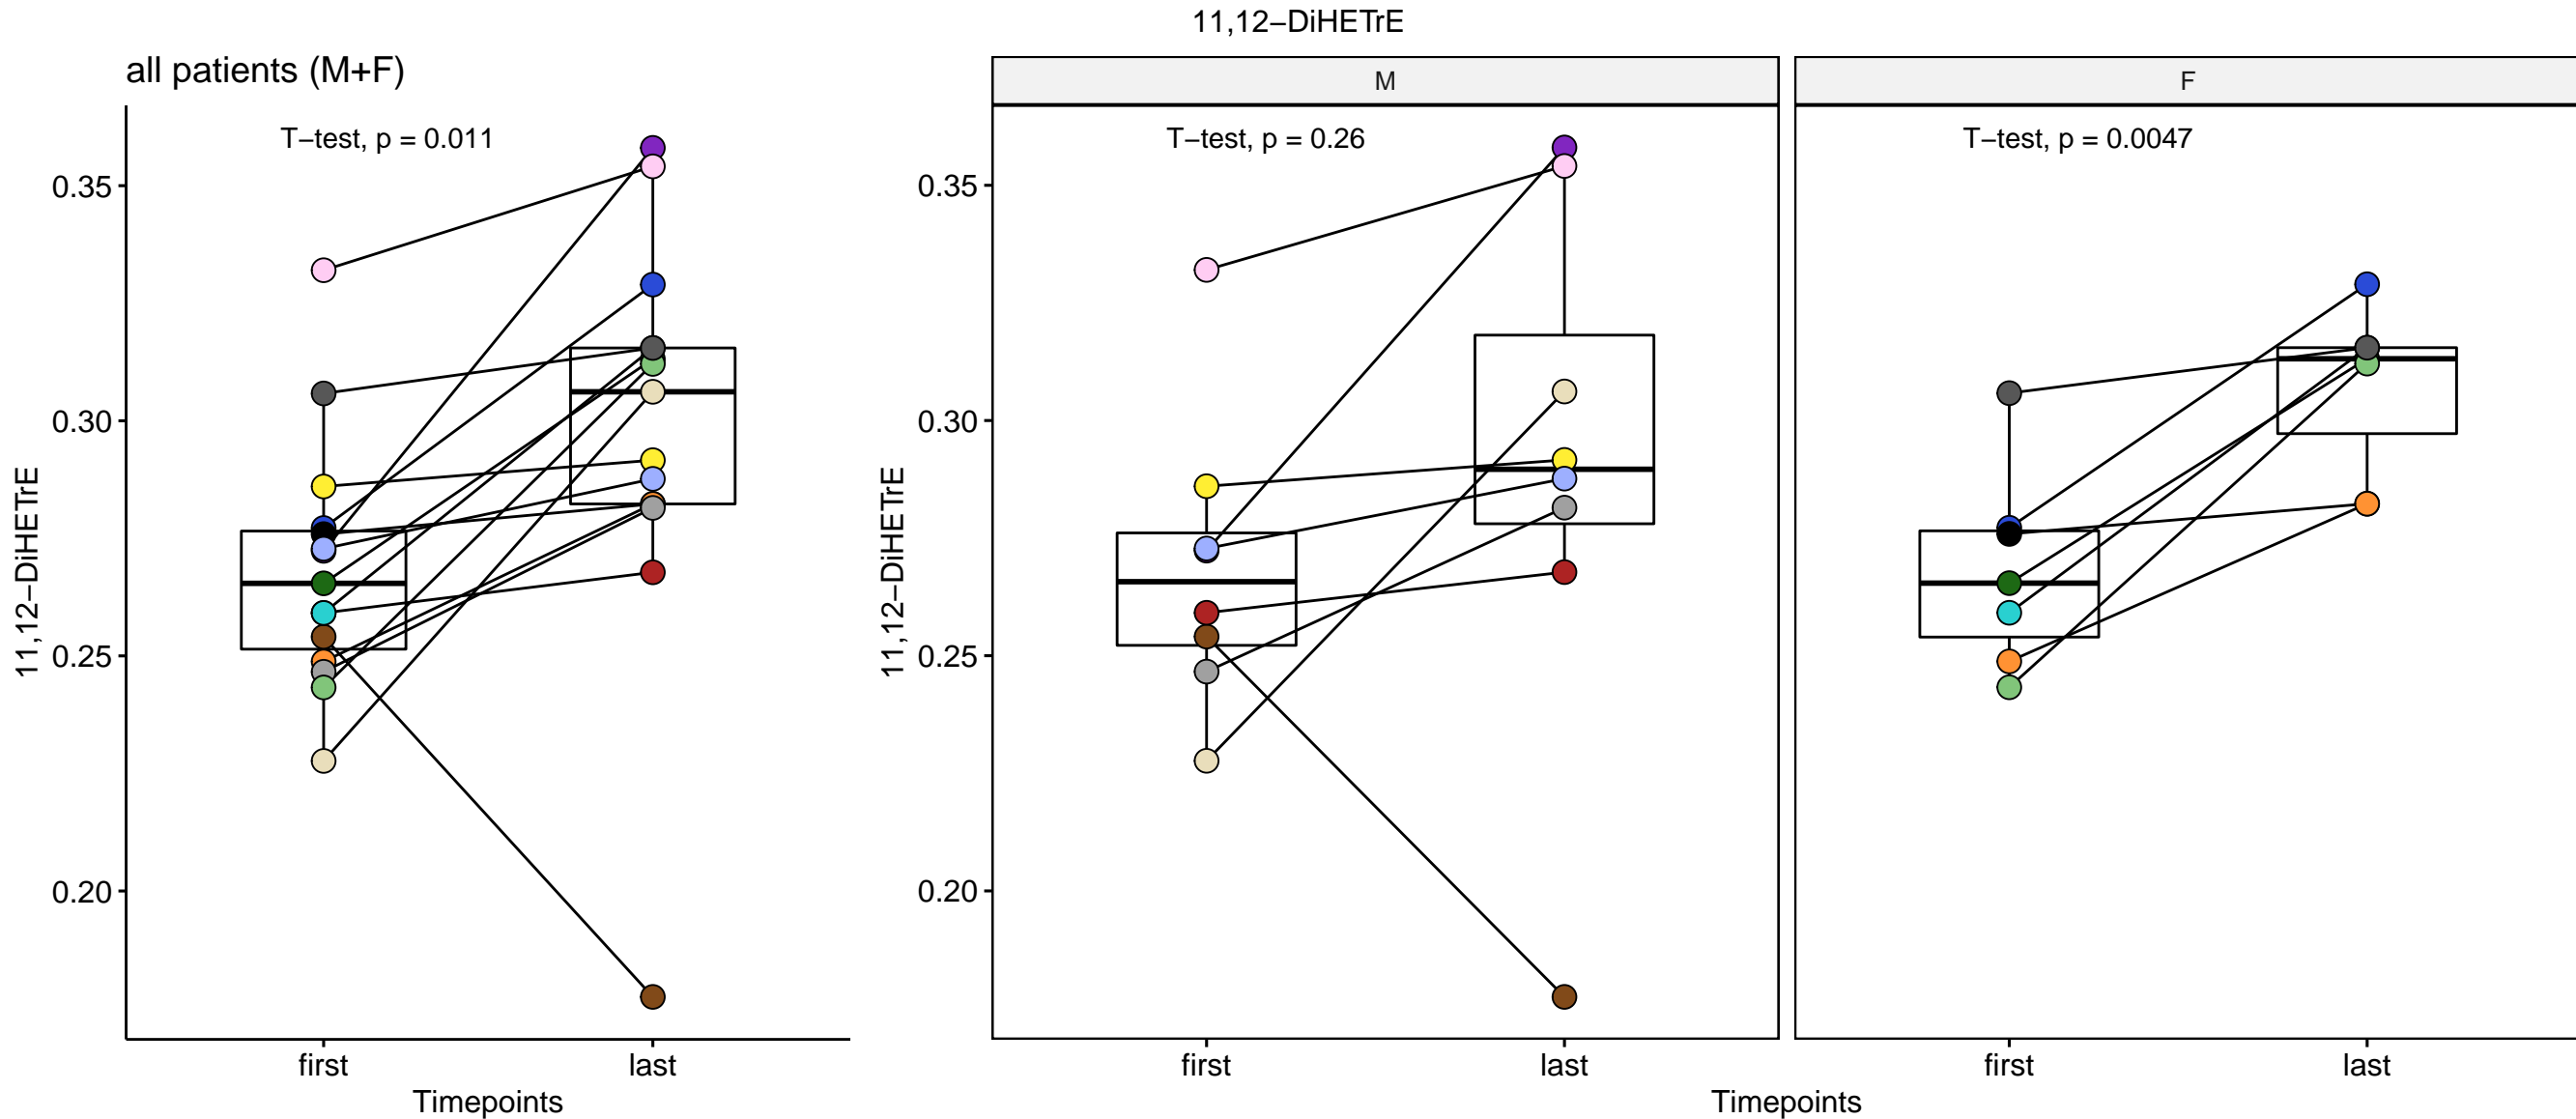

PatID

|              |               |              |              |              |
|--------------|---------------|--------------|--------------|--------------|
| 11_F68_8days | 18_F52_11days | 25_M87_3days | 30_M49_5days | 41_M70_6days |
| 12_F73_7days | 21_F53_9days  | 27_M71_4days | 32_F69_3days | 44_M57_5days |
| 13_M74_4days | 22_M65_3days  | 28_F53_6days | 40_F69_4days | 6_M79_8days  |



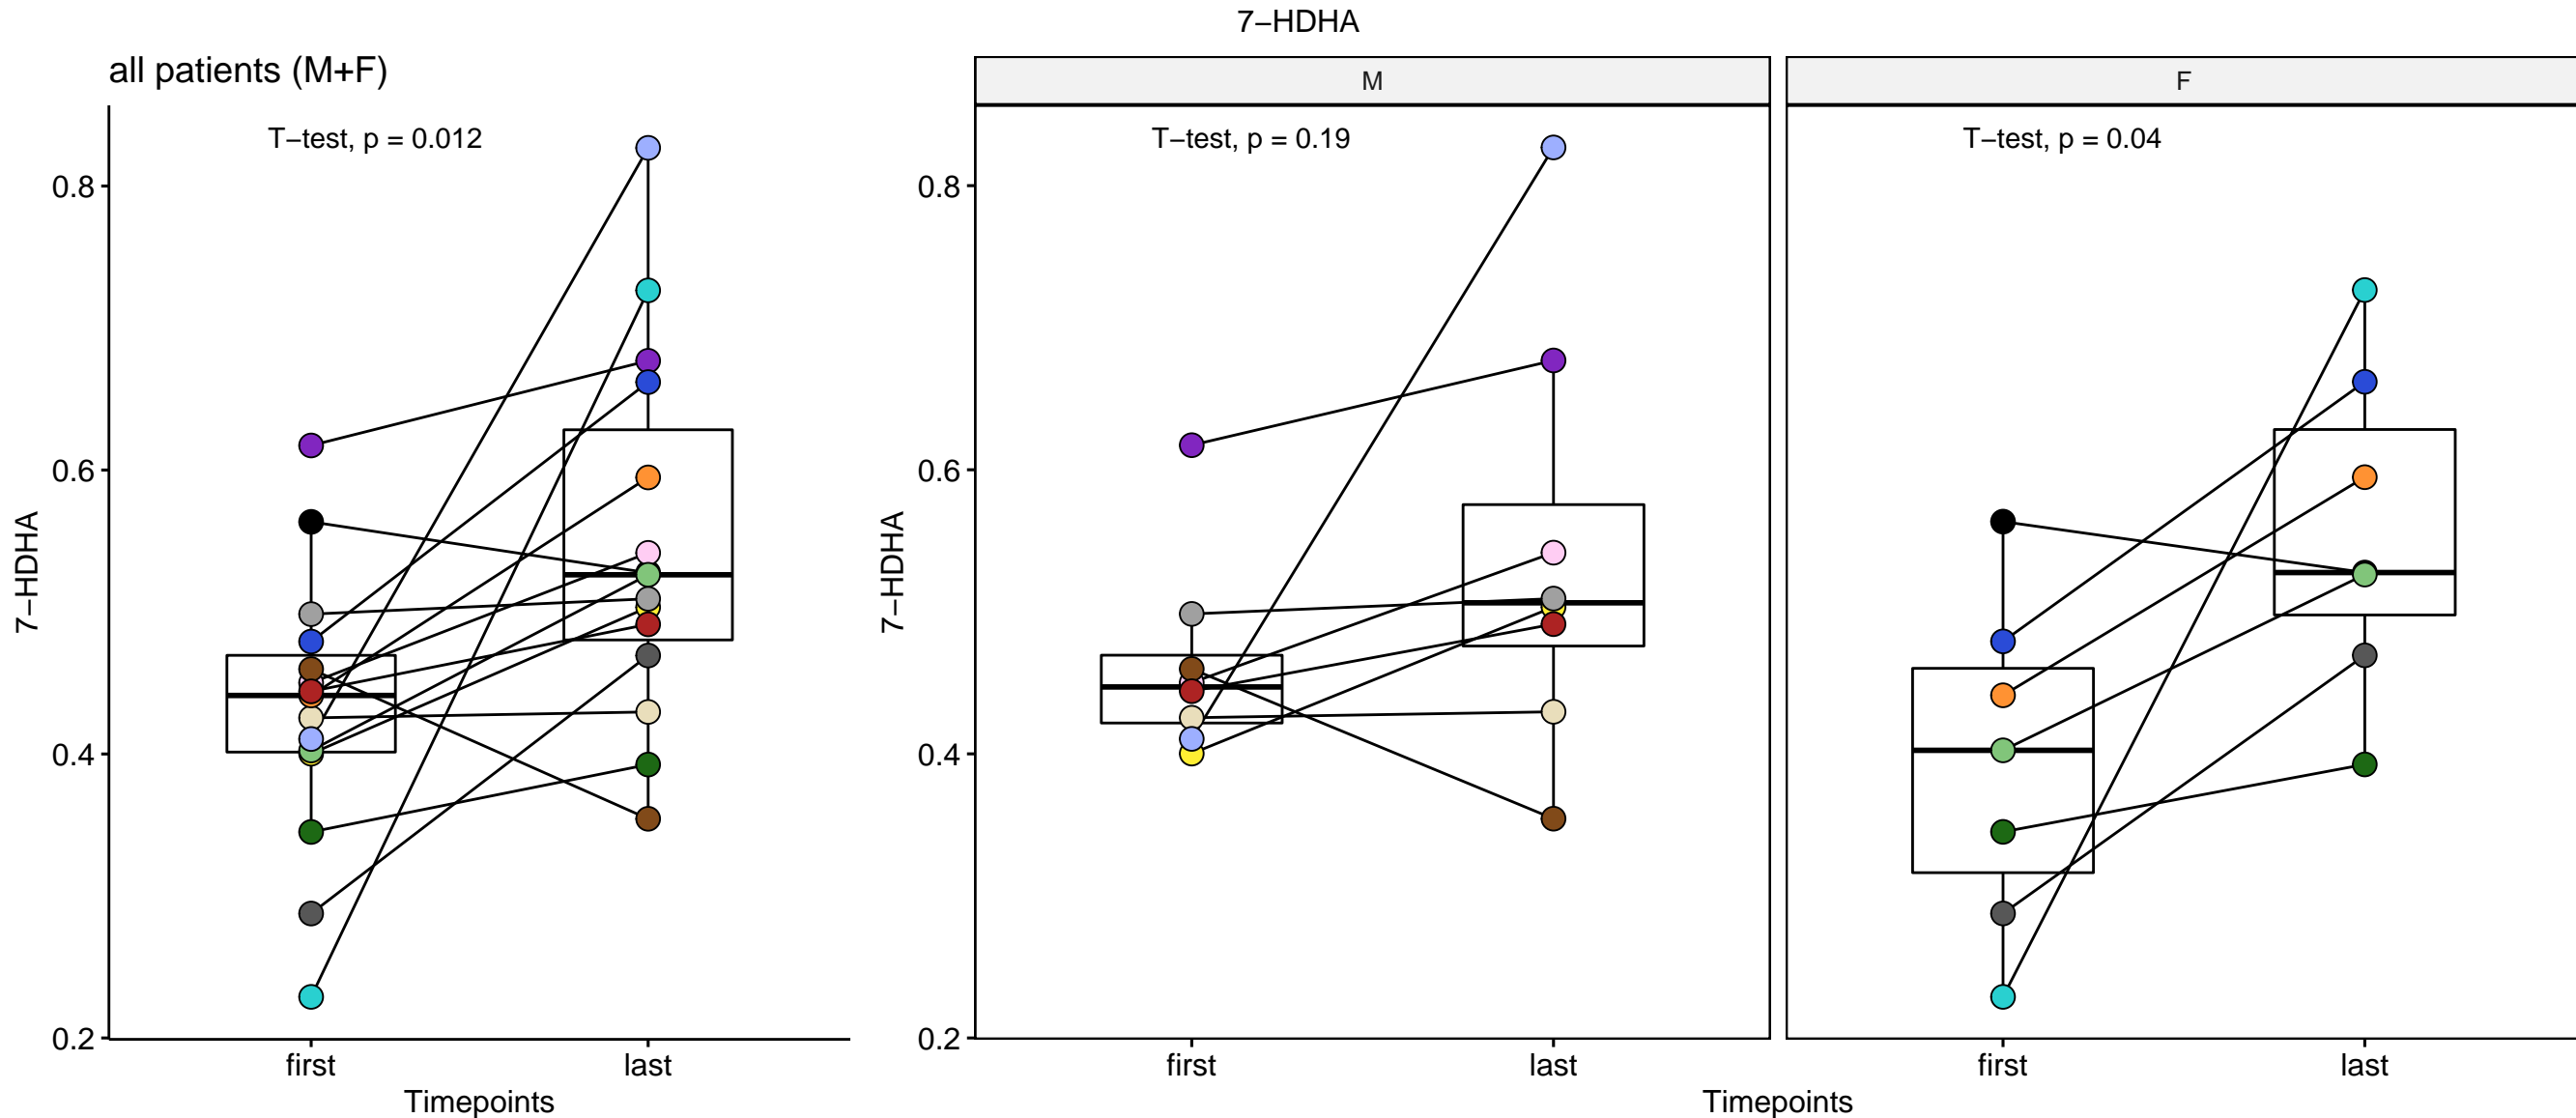

PatID

|              |               |              |              |              |
|--------------|---------------|--------------|--------------|--------------|
| 11_F68_8days | 18_F52_11days | 25_M87_3days | 30_M49_5days | 41_M70_6days |
| 12_F73_7days | 21_F53_9days  | 27_M71_4days | 32_F69_3days | 44_M57_5days |
| 13_M74_4days | 22_M65_3days  | 28_F53_6days | 40_F69_4days | 6_M79_8days  |

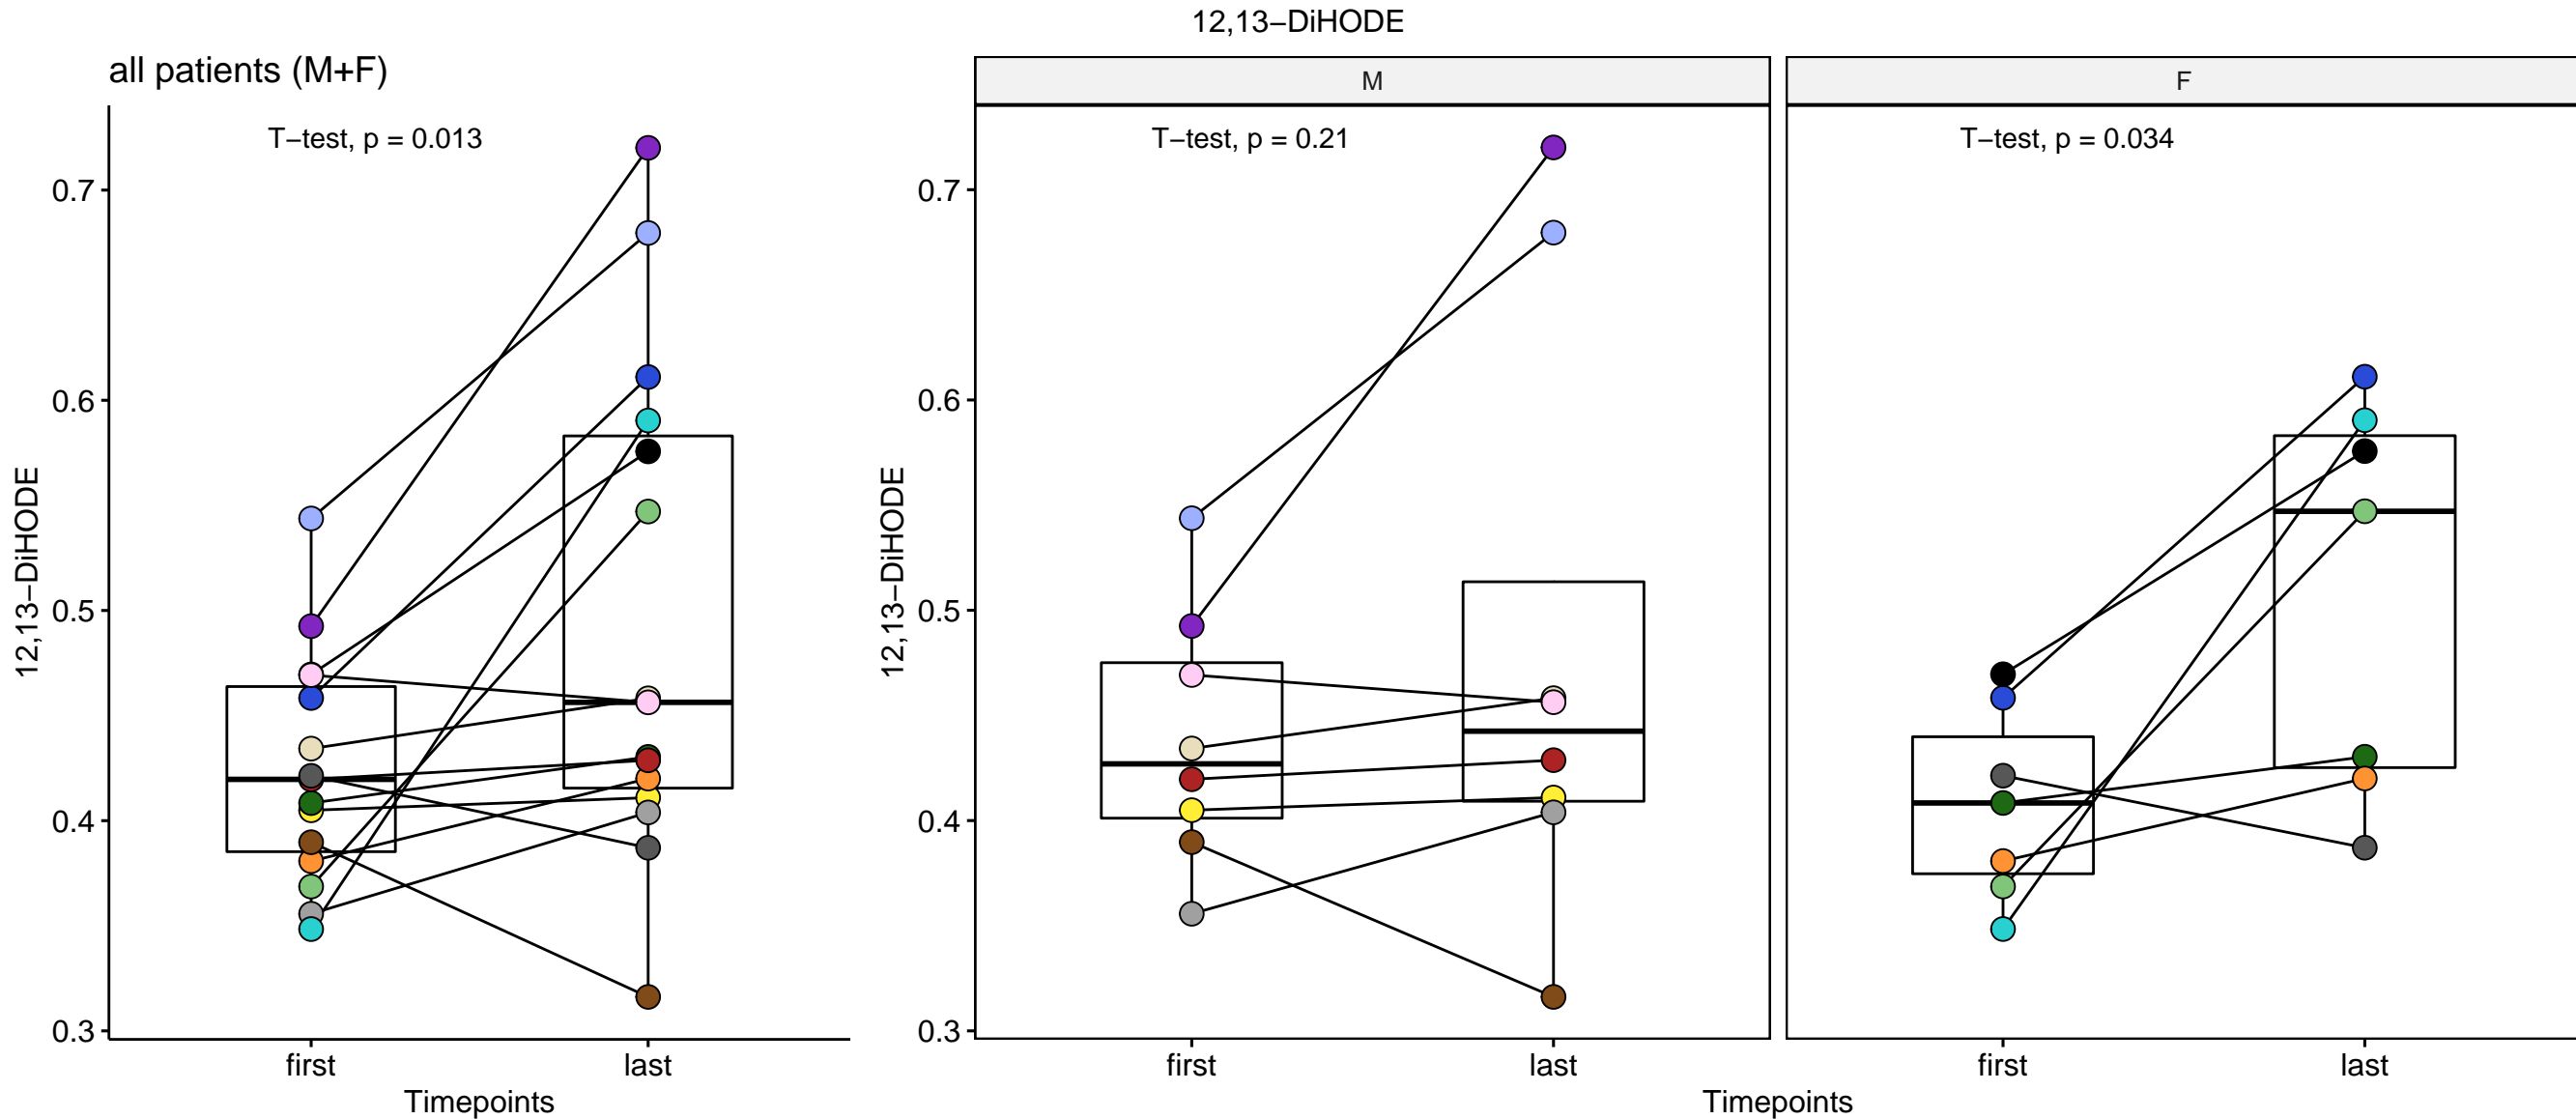

PatID

11\_F68\_8days 18\_F52\_11days 25\_M87\_3days 30\_M49\_5days 41\_M70\_6days  
12\_F73\_7days 21\_F53\_9days 27\_M71\_4days 32\_F69\_3days 44\_M57\_5days  
13\_M74\_4days 22\_M65\_3days 28\_F53\_6days 40\_F69\_4days 6\_M79\_8days

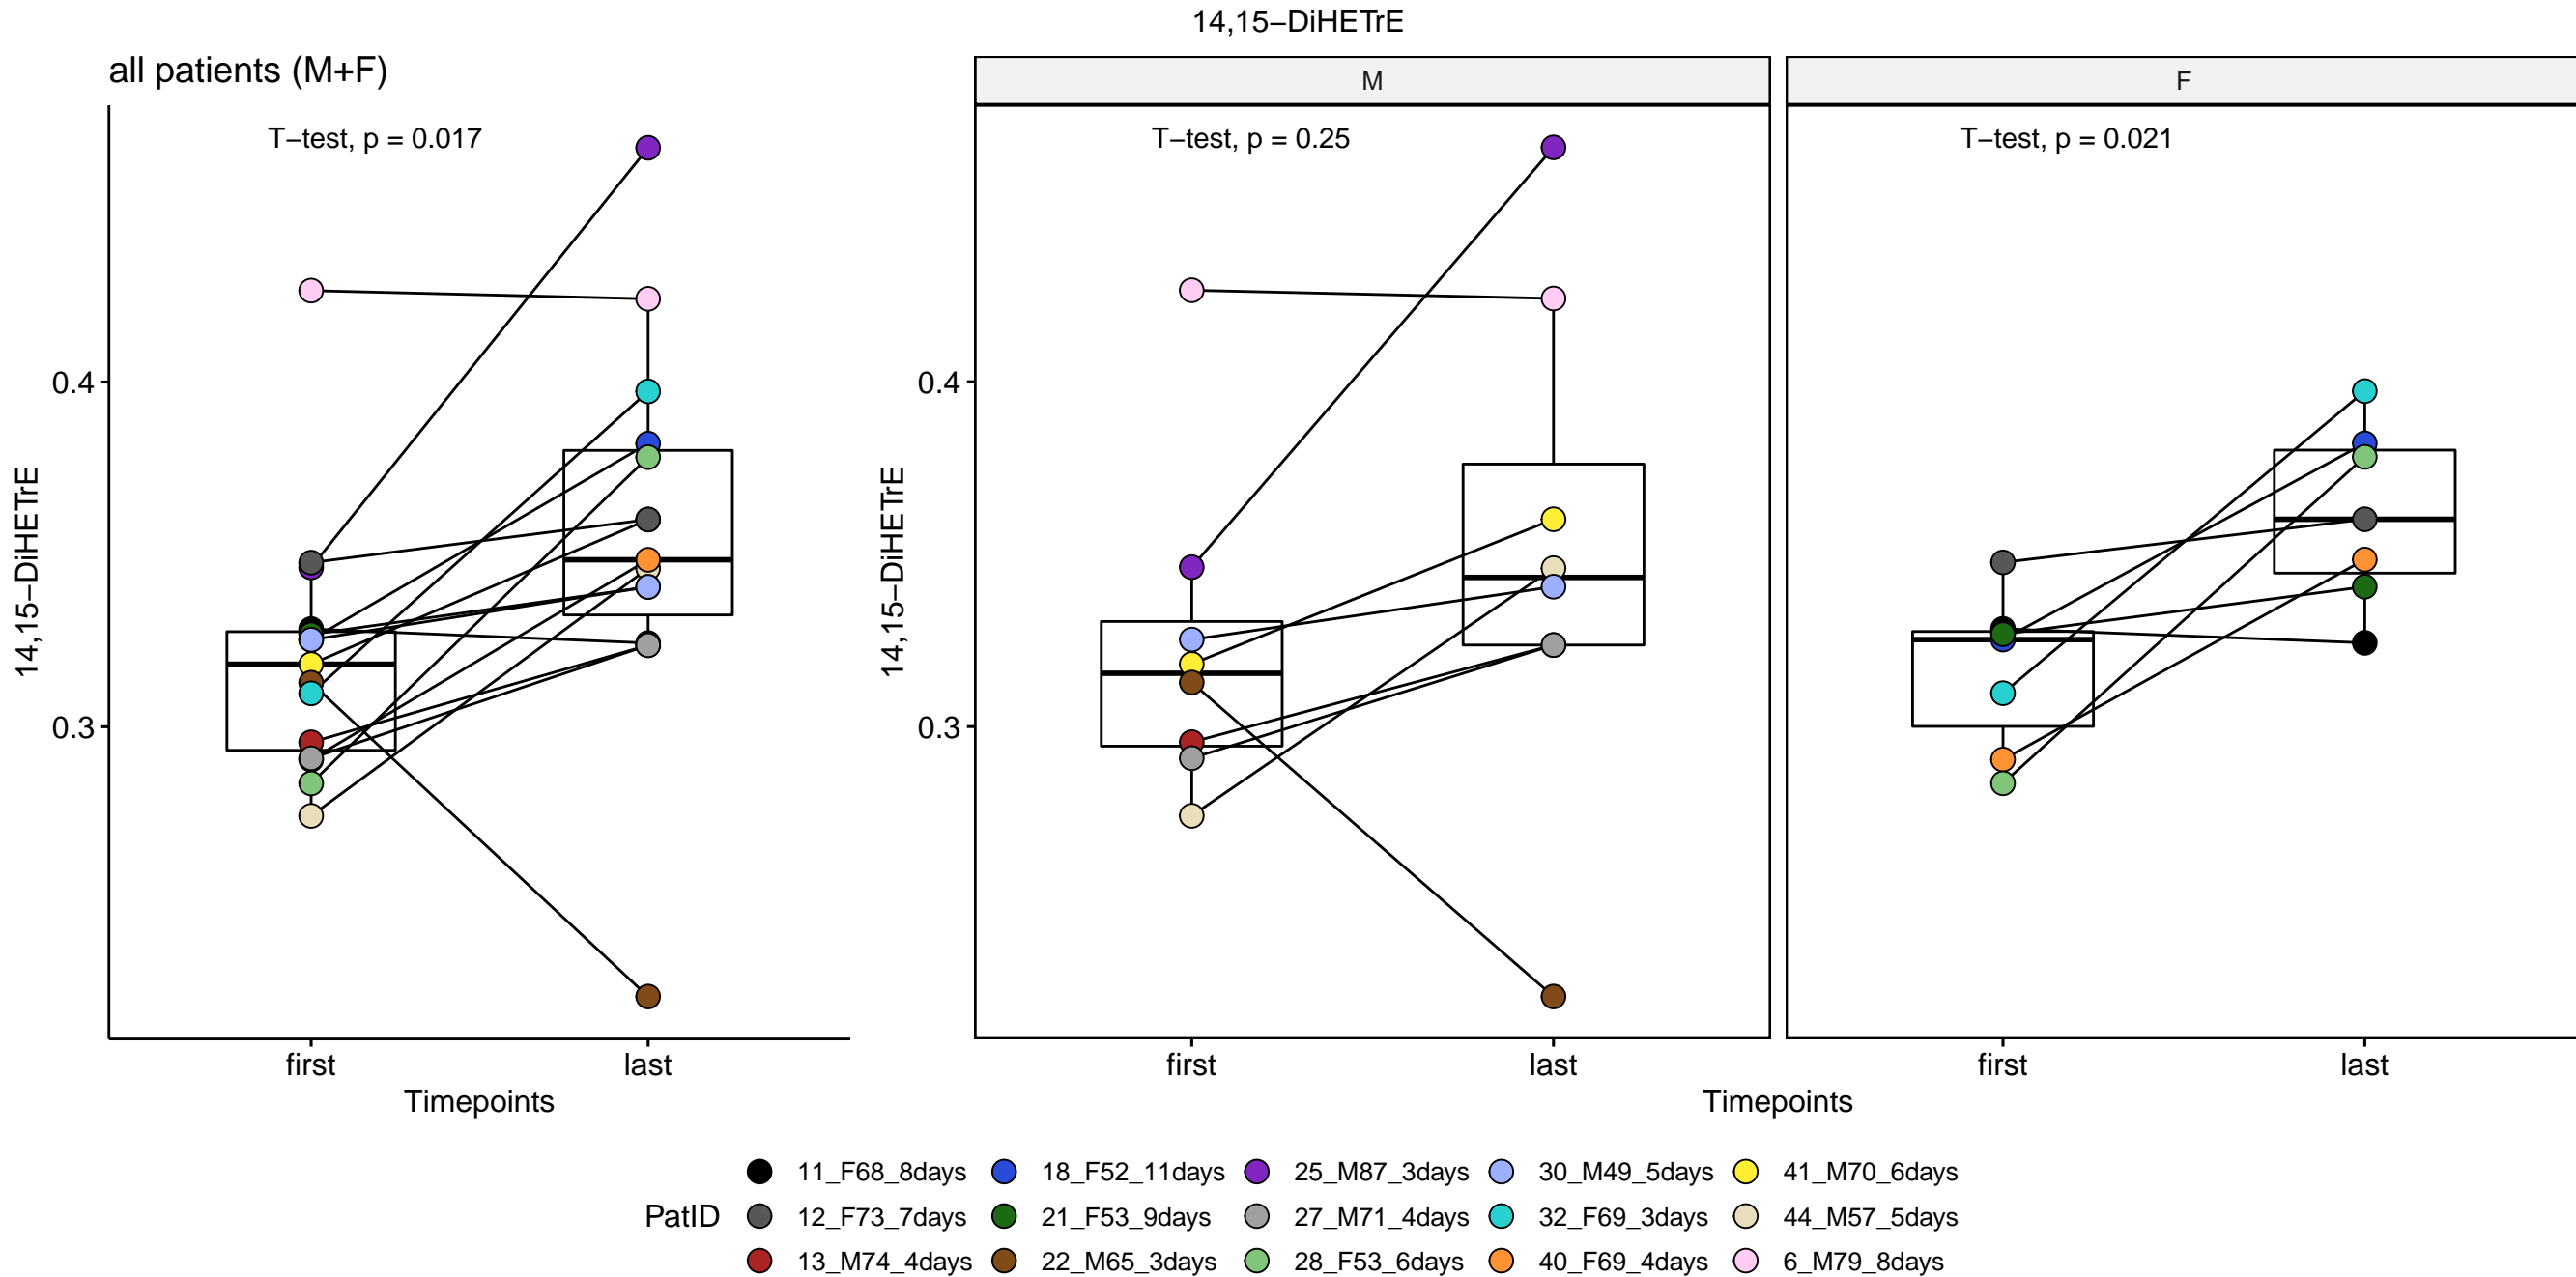

# 9,10,13-TriHOME

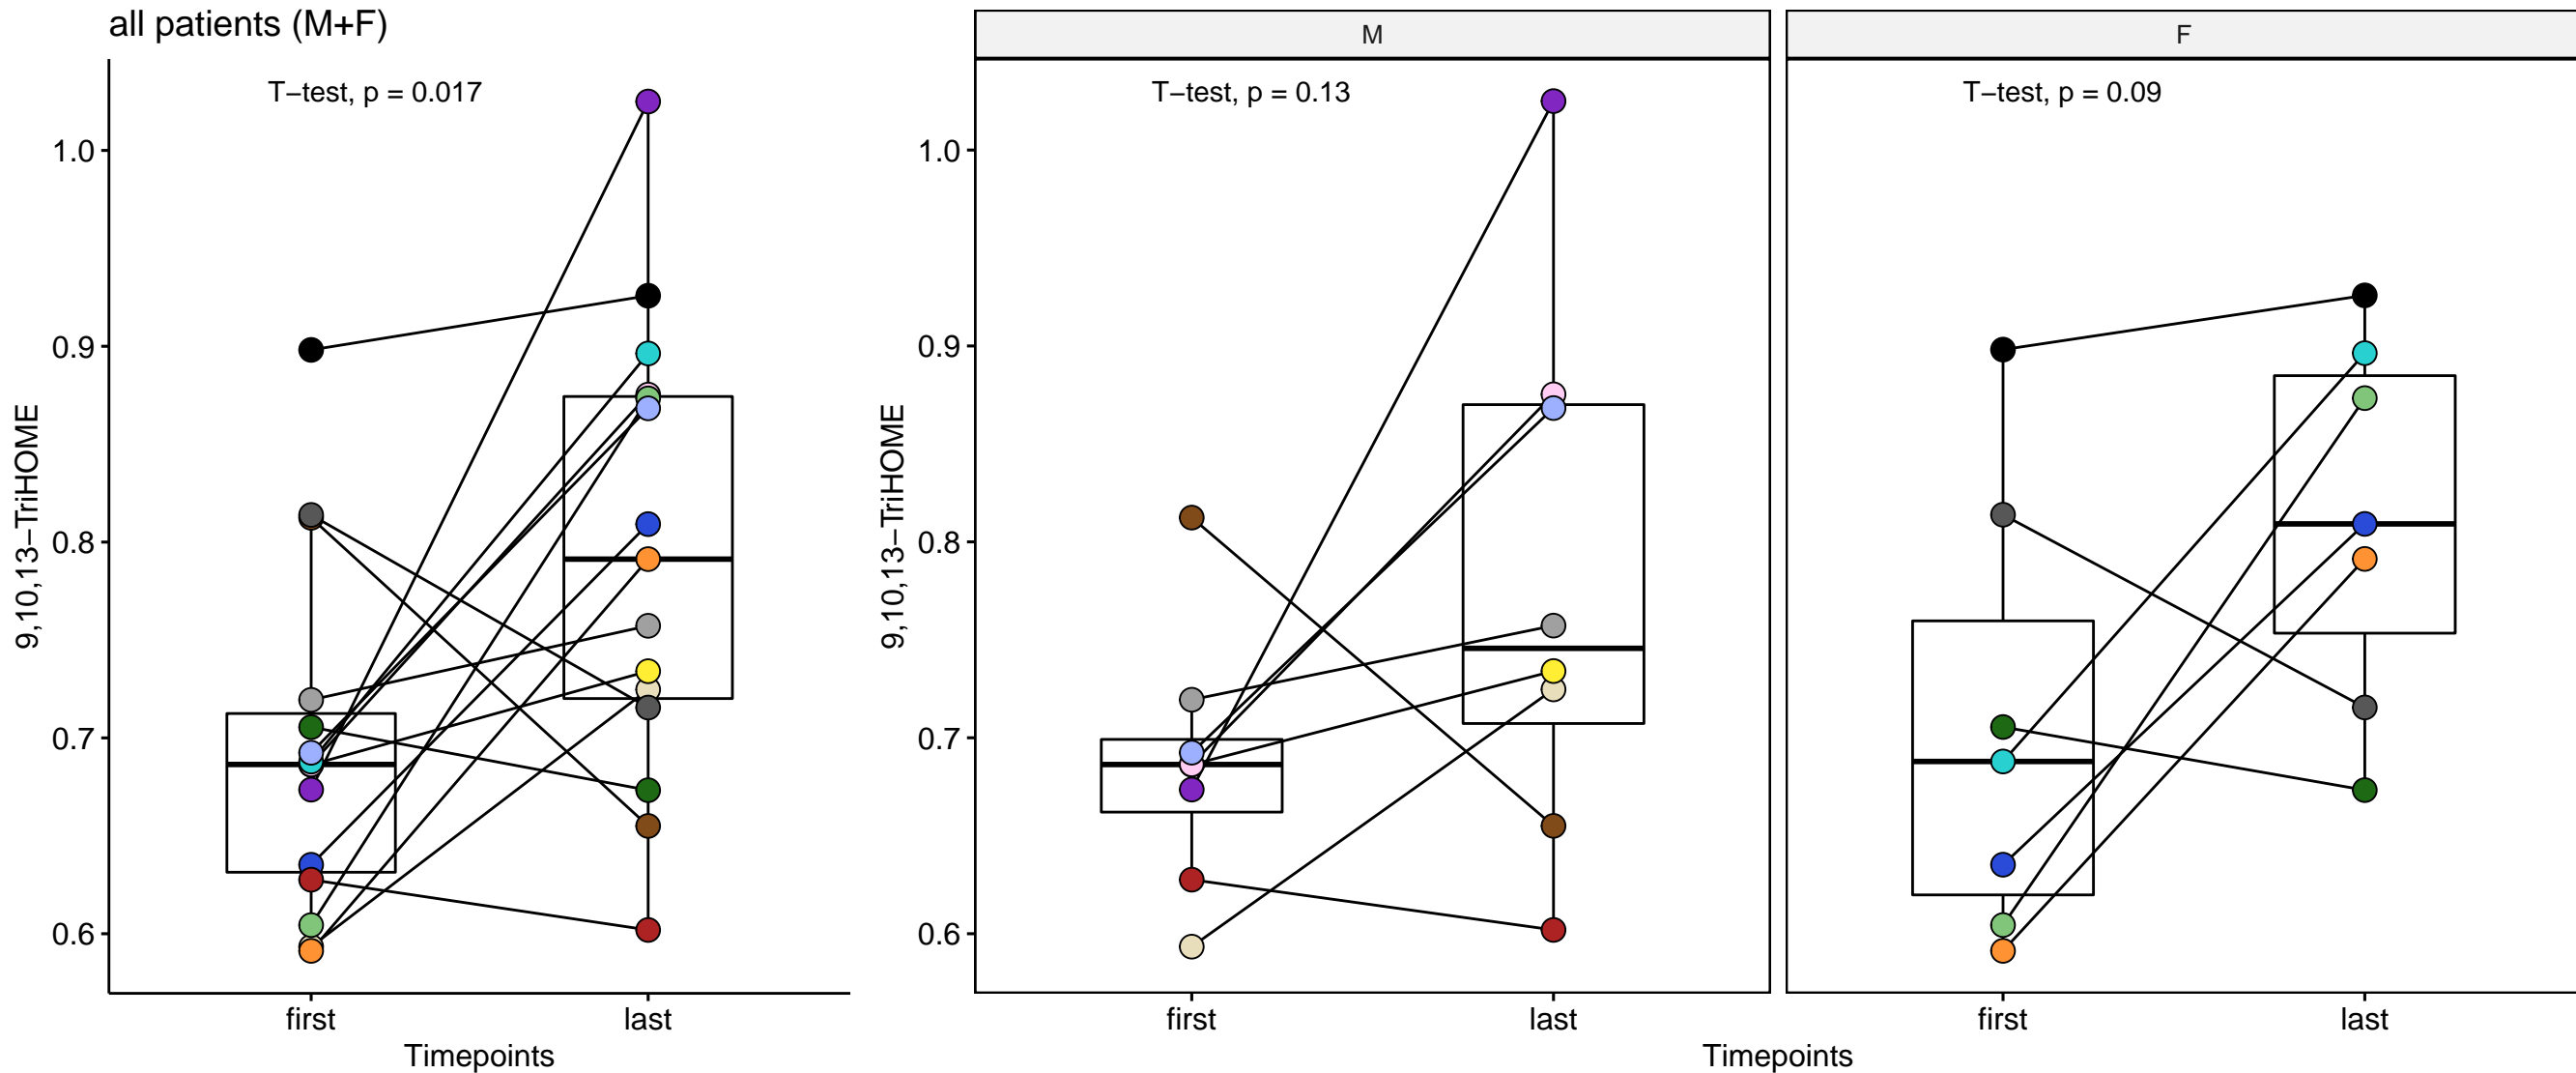

PatID

|                |                 |                |                |                |
|----------------|-----------------|----------------|----------------|----------------|
| ● 11_F68_8days | ● 18_F52_11days | ● 25_M87_3days | ● 30_M49_5days | ● 41_M70_6days |
| ● 12_F73_7days | ● 21_F53_9days  | ● 27_M71_4days | ● 32_F69_3days | ● 44_M57_5days |
| ● 13_M74_4days | ● 22_M65_3days  | ● 28_F53_6days | ● 40_F69_4days | ● 6_M79_8days  |

all patients (M+F)

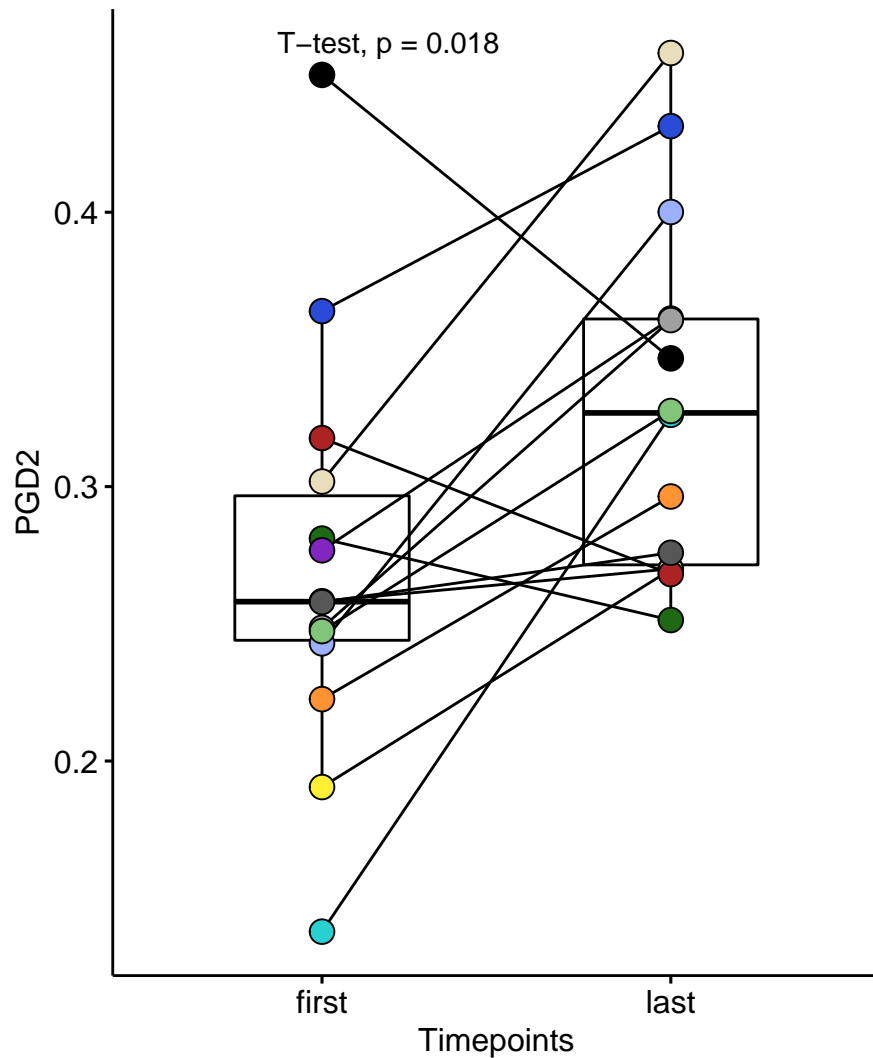

PGD2

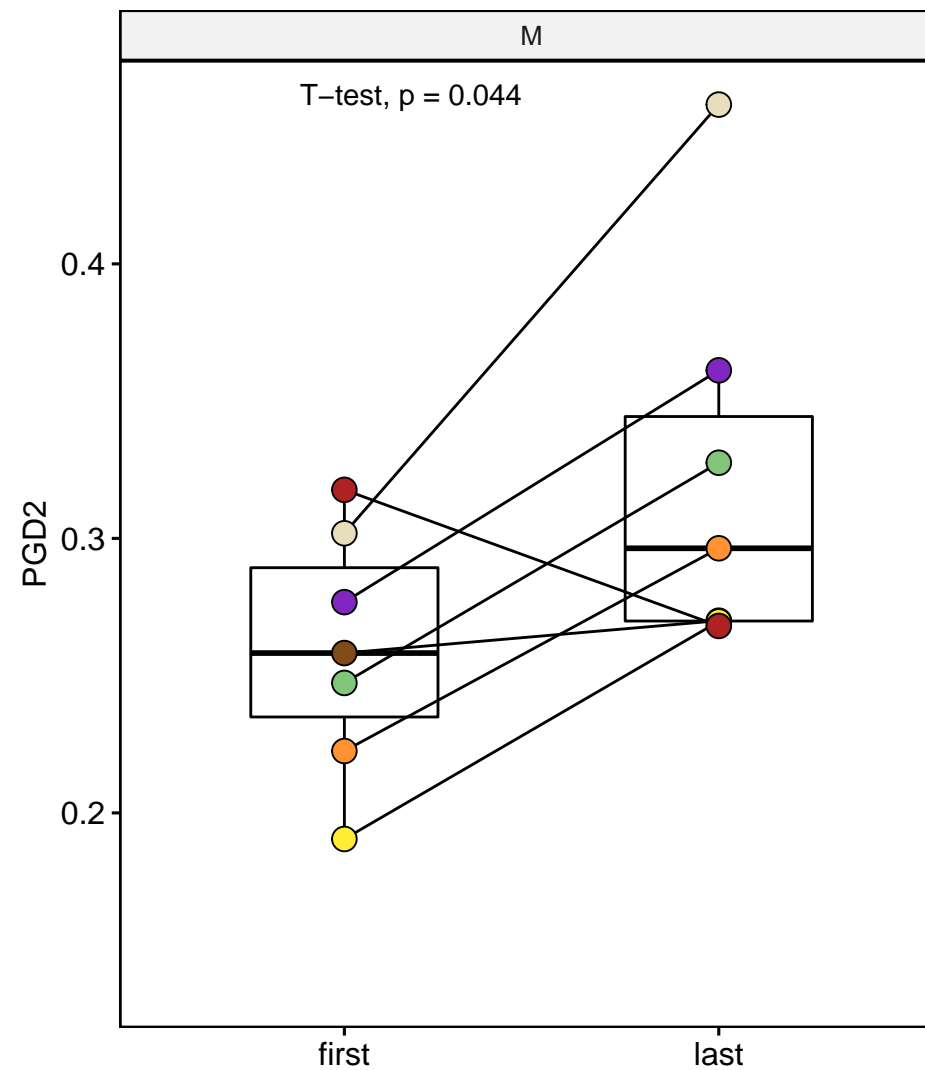

F

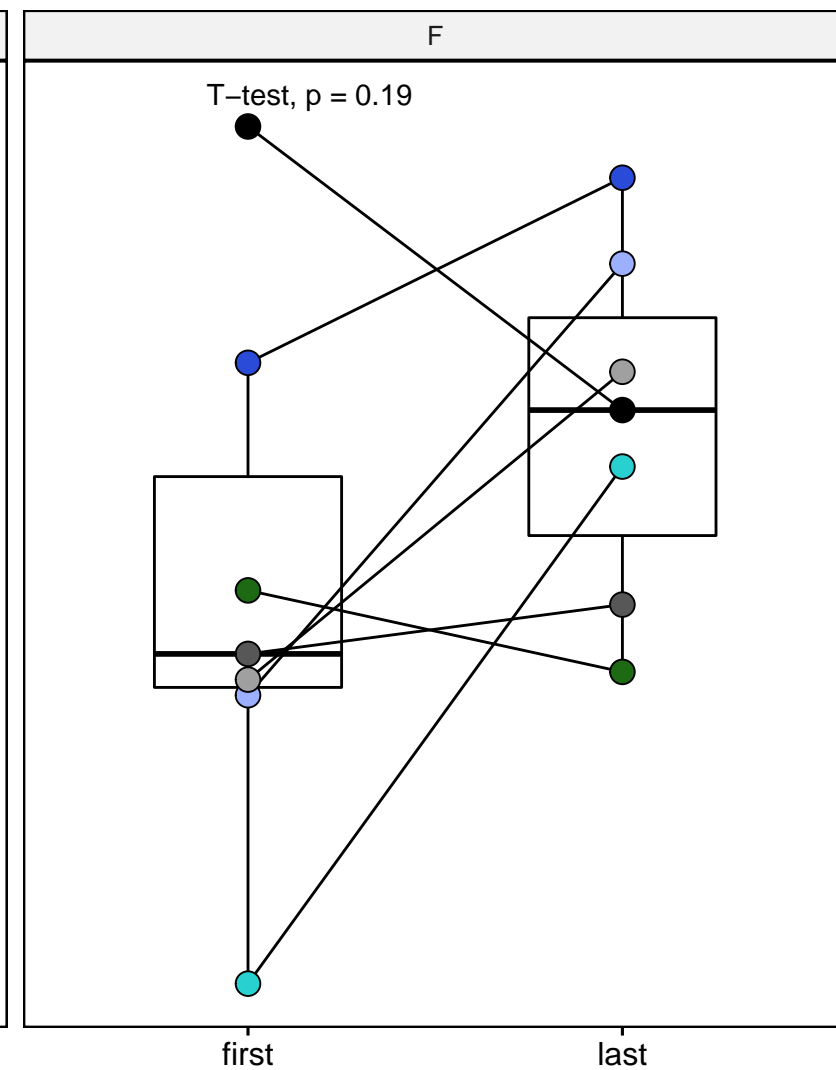

PatID

|                |                 |                |                |                |
|----------------|-----------------|----------------|----------------|----------------|
| ● 11_F68_8days | ● 18_F52_11days | ● 27_M71_4days | ● 32_F69_3days | ● 44_M57_5days |
| ● 12_F73_7days | ● 21_F53_9days  | ● 28_F53_6days | ● 40_F69_4days | ● 6_M79_8days  |
| ● 13_M74_4days | ● 25_M87_3days  | ● 30_M49_5days | ● 41_M70_6days |                |

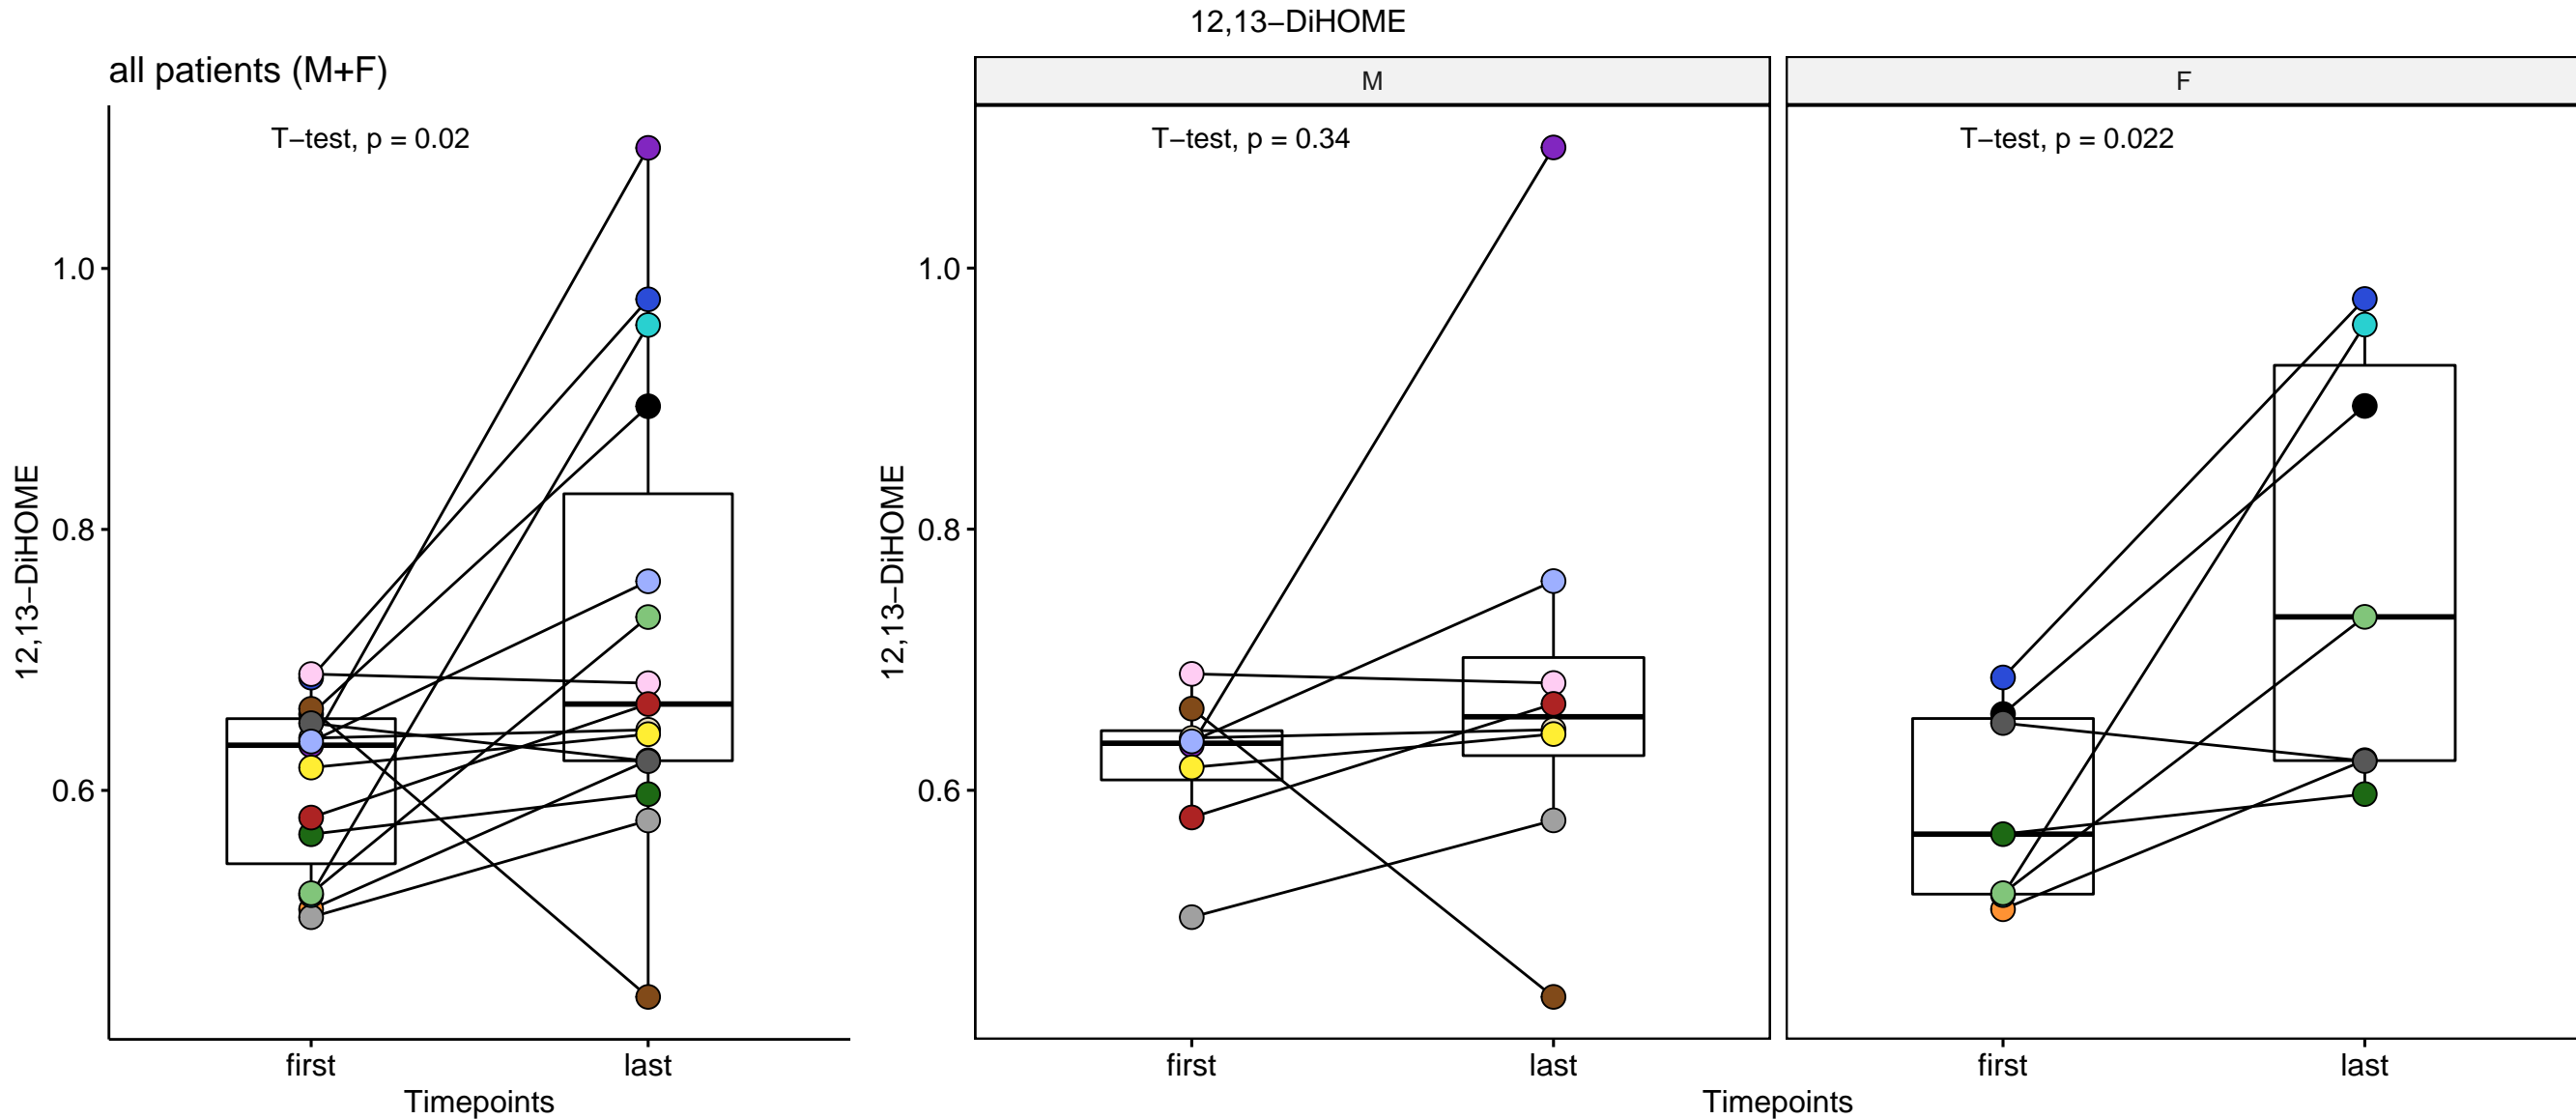

PatID

|              |               |              |              |              |
|--------------|---------------|--------------|--------------|--------------|
| 11_F68_8days | 18_F52_11days | 25_M87_3days | 30_M49_5days | 41_M70_6days |
| 12_F73_7days | 21_F53_9days  | 27_M71_4days | 32_F69_3days | 44_M57_5days |
| 13_M74_4days | 22_M65_3days  | 28_F53_6days | 40_F69_4days | 6_M79_8days  |

all patients (M+F)

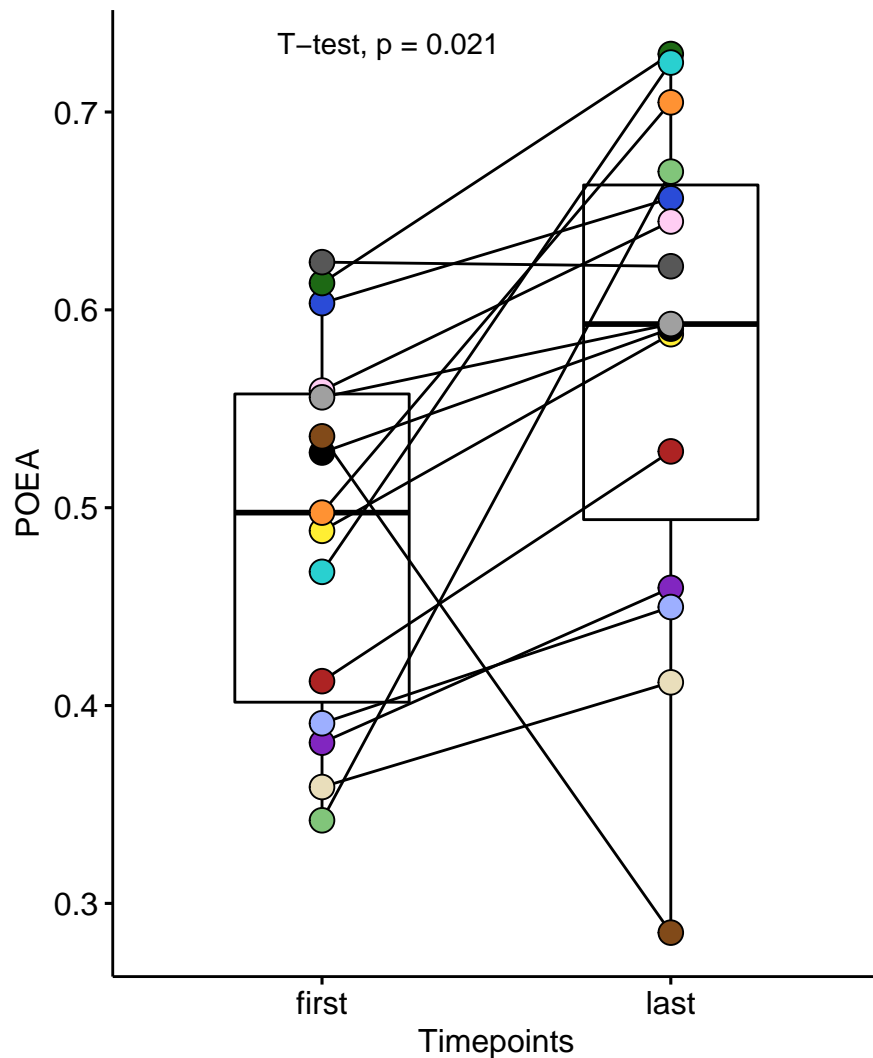

POEA

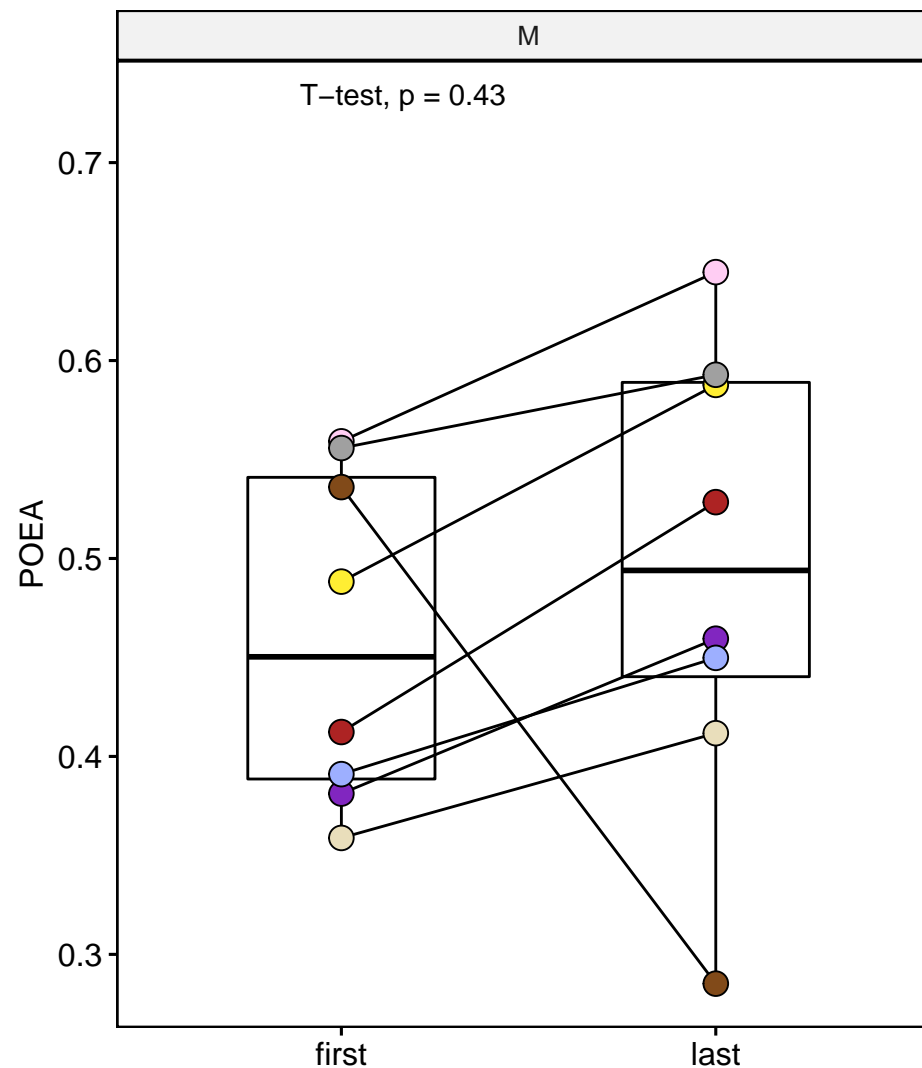

F

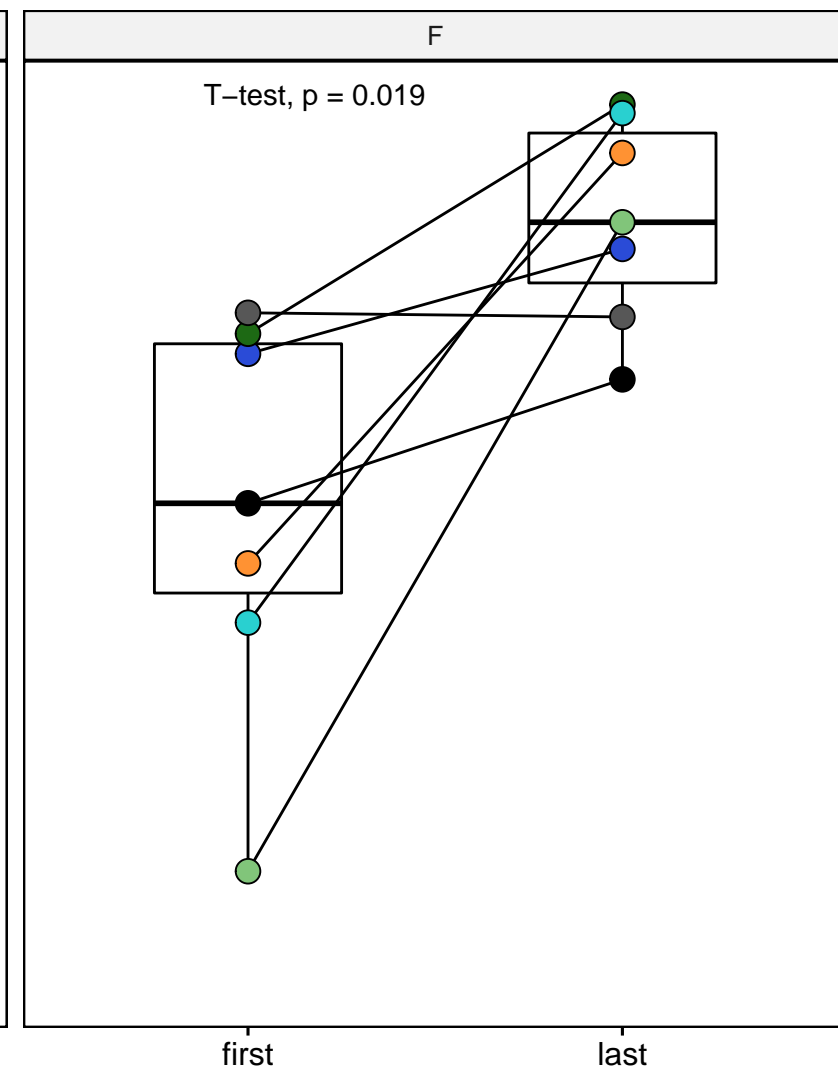

PatID

|                |                 |                |                |                |
|----------------|-----------------|----------------|----------------|----------------|
| ● 11_F68_8days | ● 18_F52_11days | ● 25_M87_3days | ● 30_M49_5days | ● 41_M70_6days |
| ● 12_F73_7days | ● 21_F53_9days  | ● 27_M71_4days | ● 32_F69_3days | ● 44_M57_5days |
| ● 13_M74_4days | ● 22_M65_3days  | ● 28_F53_6days | ● 40_F69_4days | ● 6_M79_8days  |

# aLEA

all patients (M+F)

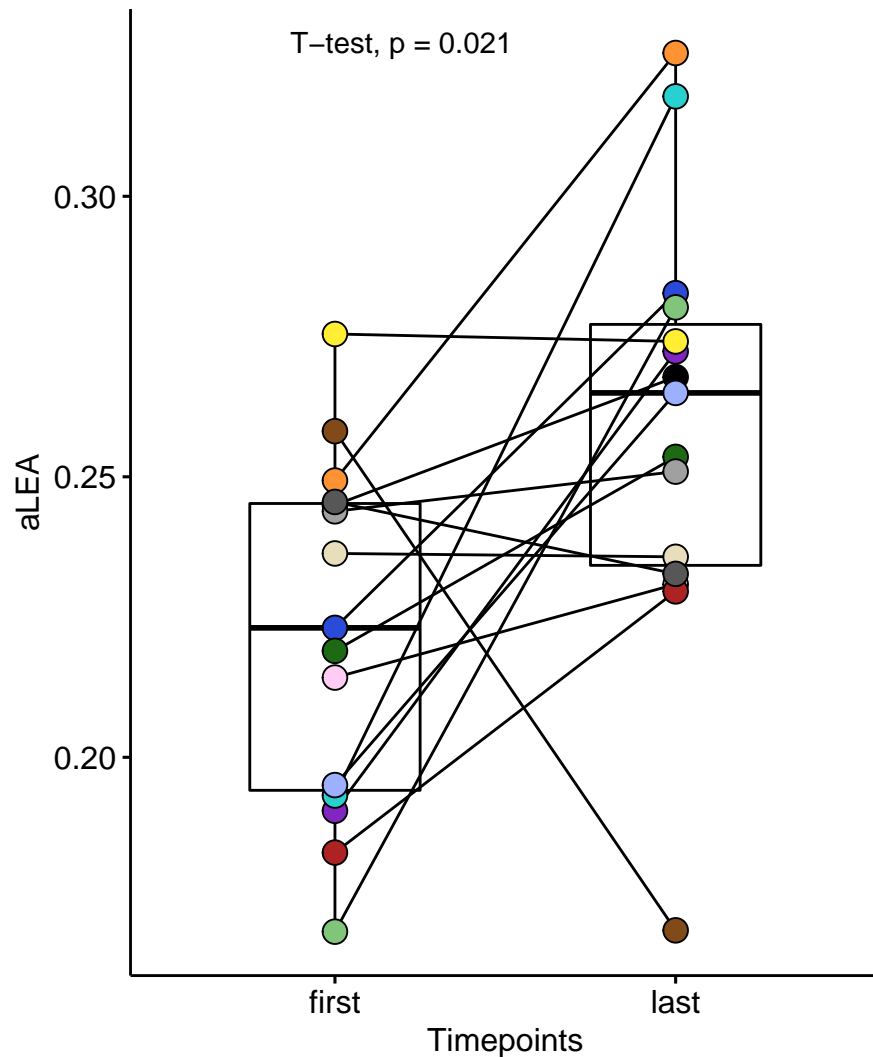

M

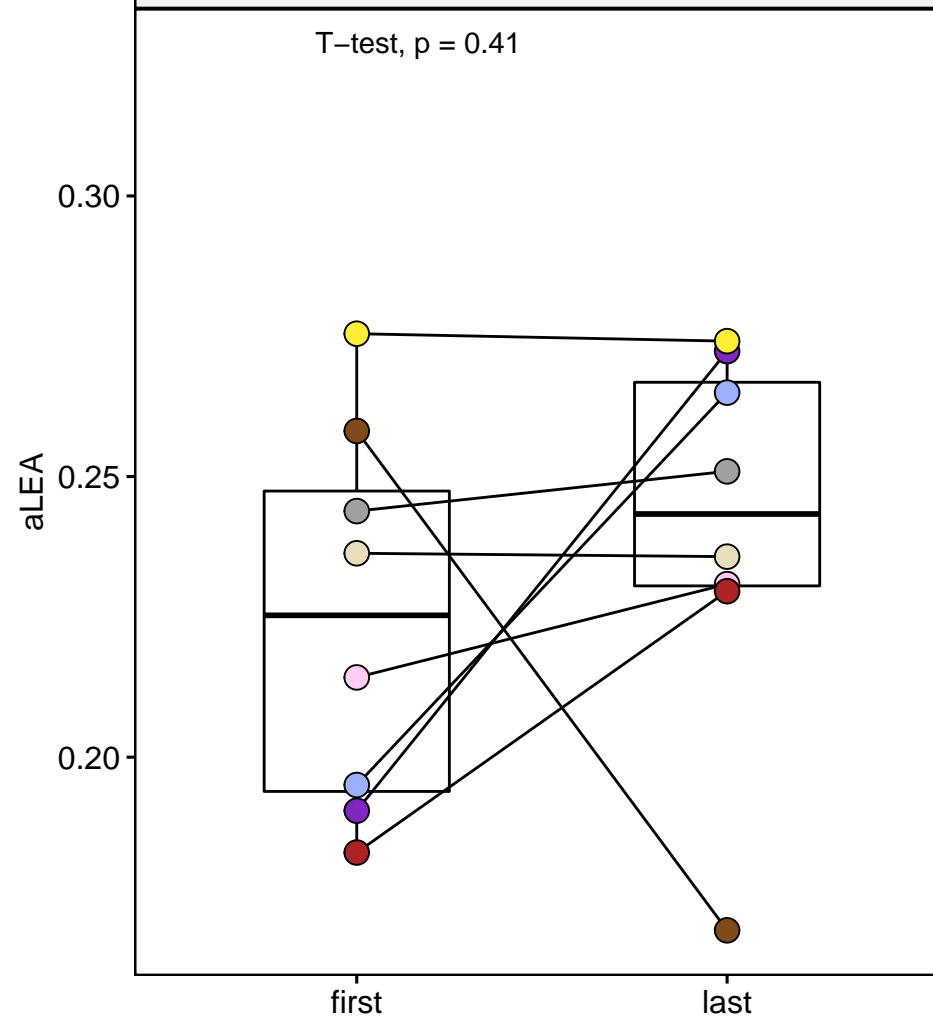

F

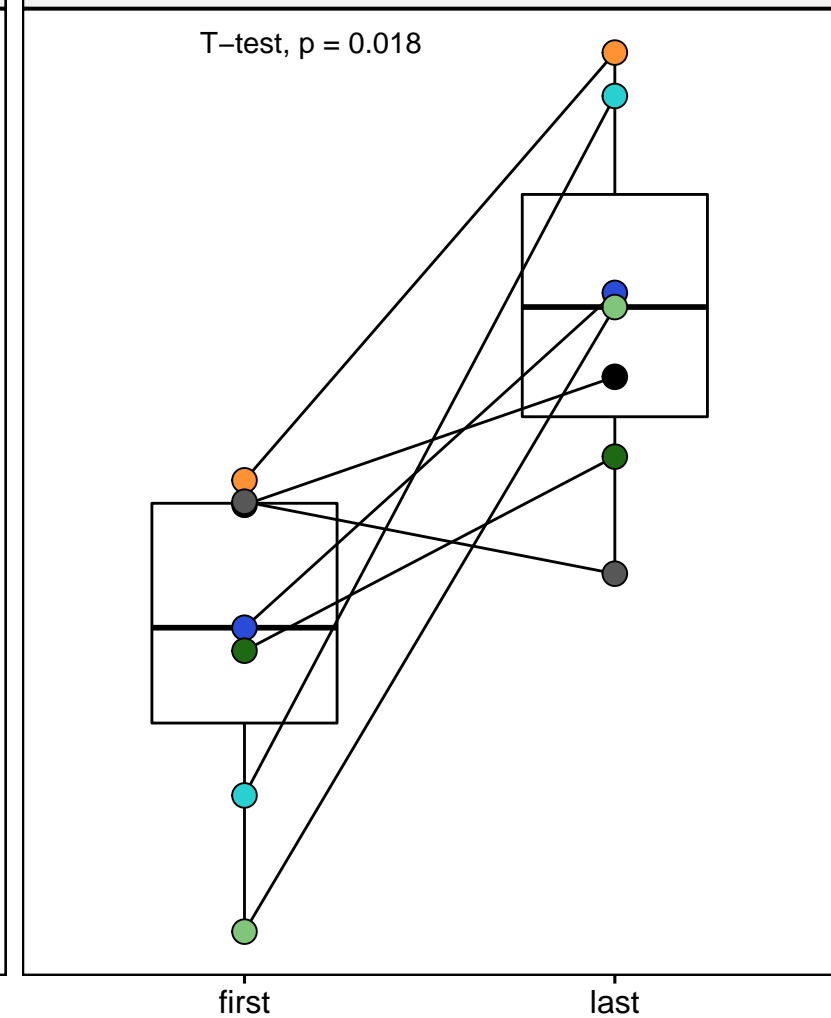

PatID

|                |                 |                |                |                |
|----------------|-----------------|----------------|----------------|----------------|
| ● 11_F68_8days | ● 18_F52_11days | ● 25_M87_3days | ● 30_M49_5days | ● 41_M70_6days |
| ● 12_F73_7days | ● 21_F53_9days  | ● 27_M71_4days | ● 32_F69_3days | ● 44_M57_5days |
| ● 13_M74_4days | ● 22_M65_3days  | ● 28_F53_6days | ● 40_F69_4days | ● 6_M79_8days  |



all patients (M+F)

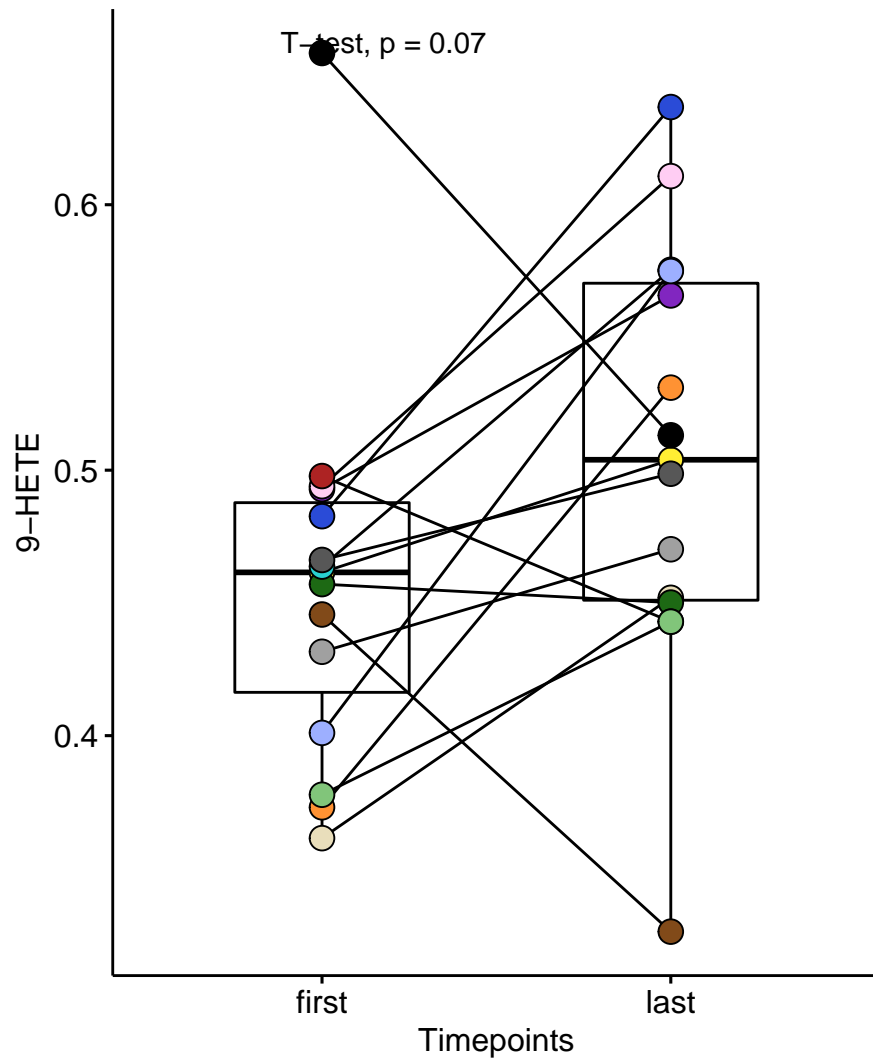

9-HETE

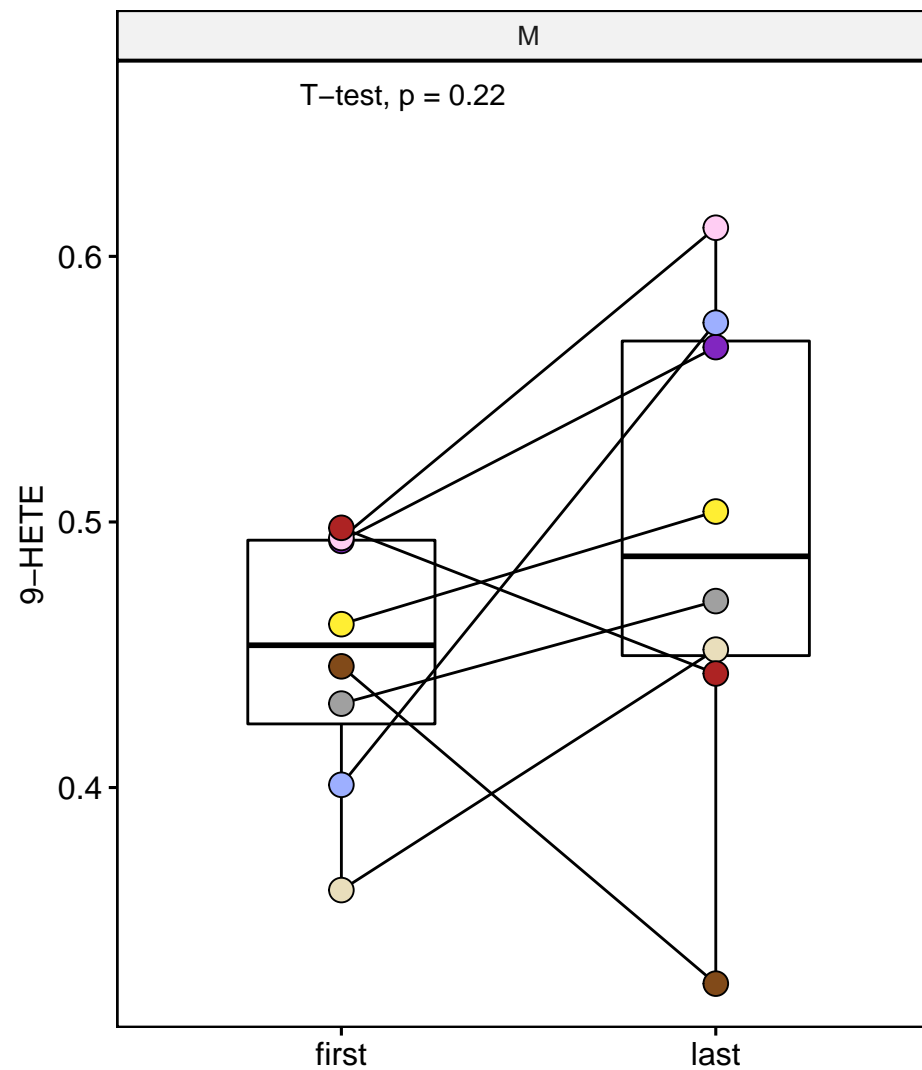

F

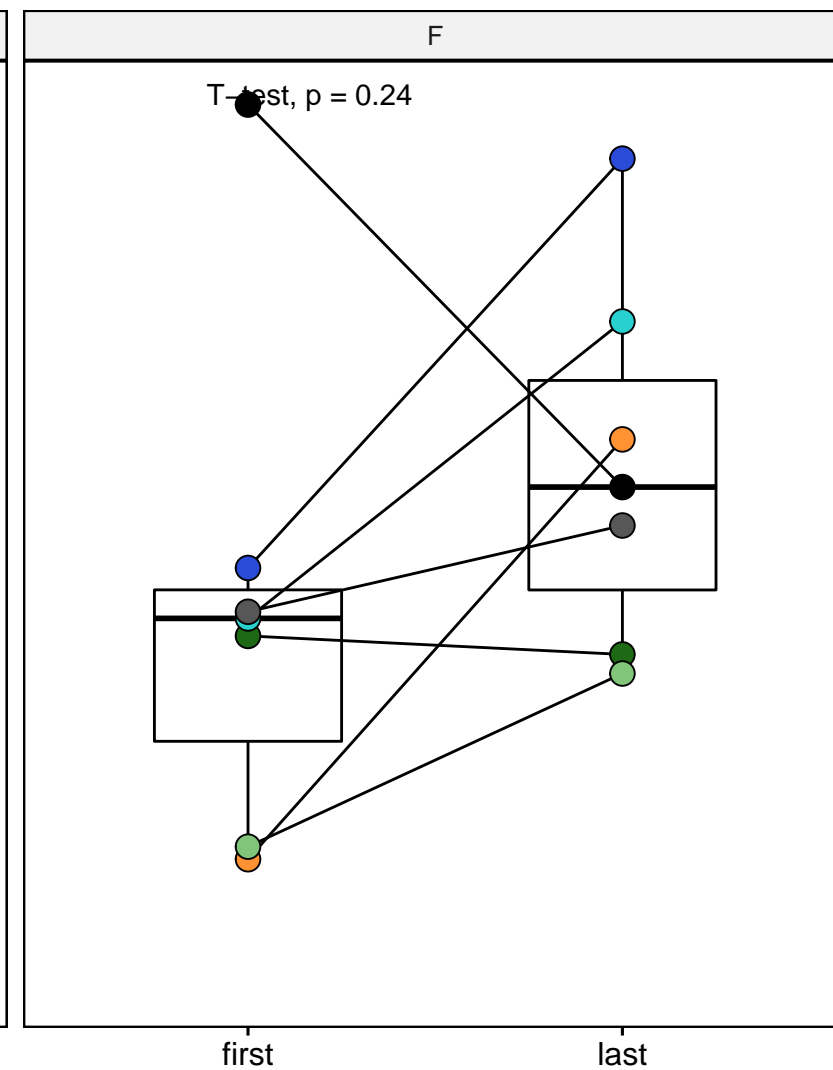

PatID

|                |                 |                |                |                |
|----------------|-----------------|----------------|----------------|----------------|
| ● 11_F68_8days | ● 18_F52_11days | ● 25_M87_3days | ● 30_M49_5days | ● 41_M70_6days |
| ● 12_F73_7days | ● 21_F53_9days  | ● 27_M71_4days | ● 32_F69_3days | ● 44_M57_5days |
| ● 13_M74_4days | ● 22_M65_3days  | ● 28_F53_6days | ● 40_F69_4days | ● 6_M79_8days  |

all patients (M+F)

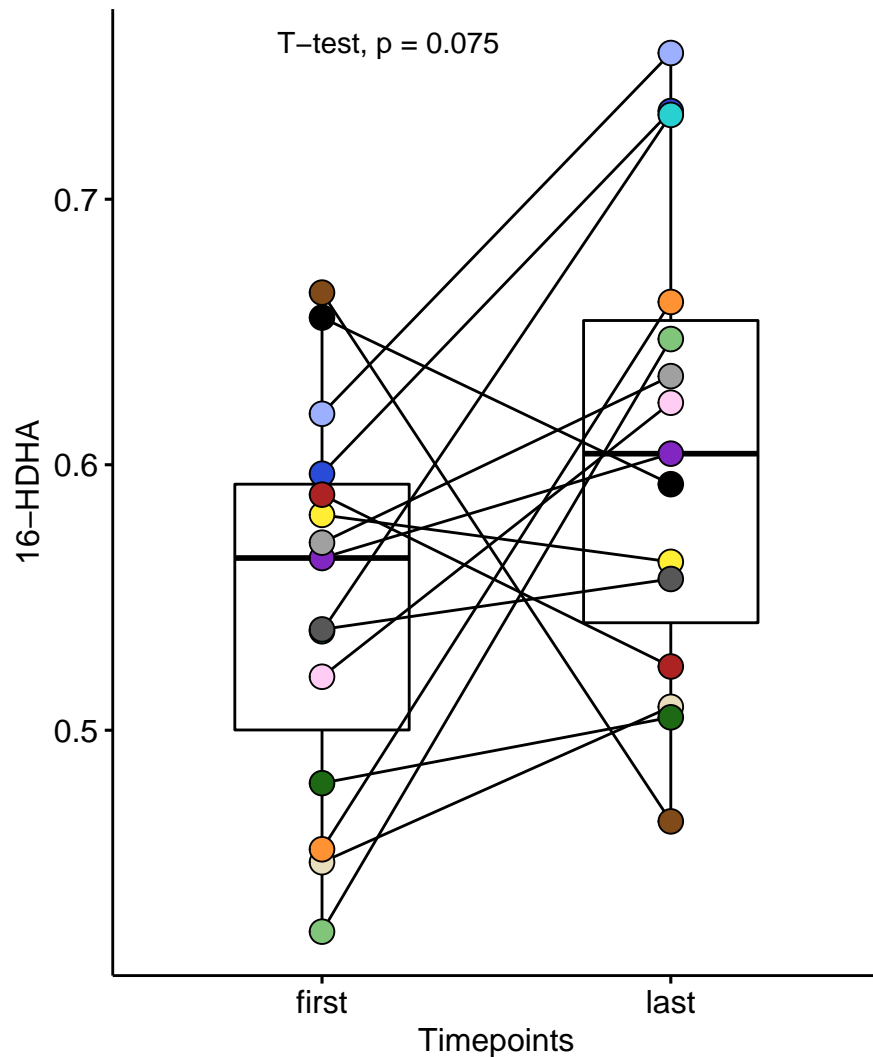

16-HDHA

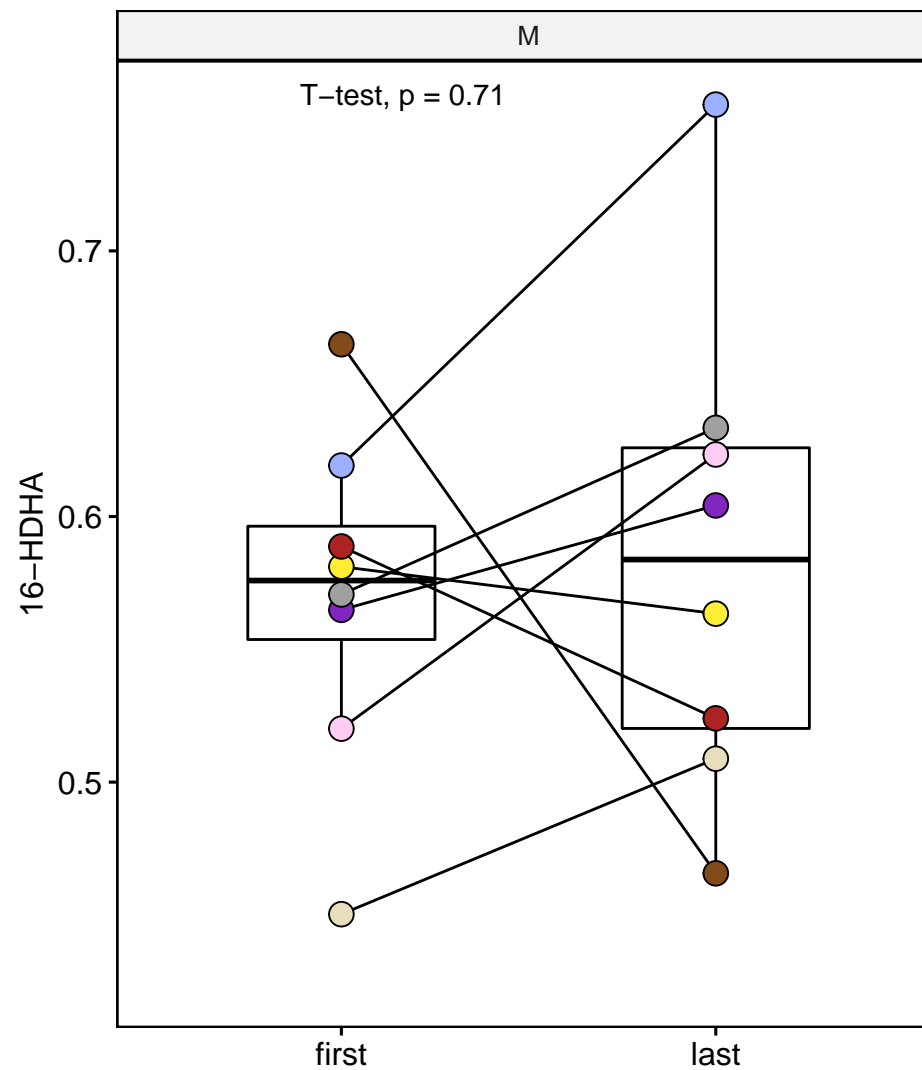

F

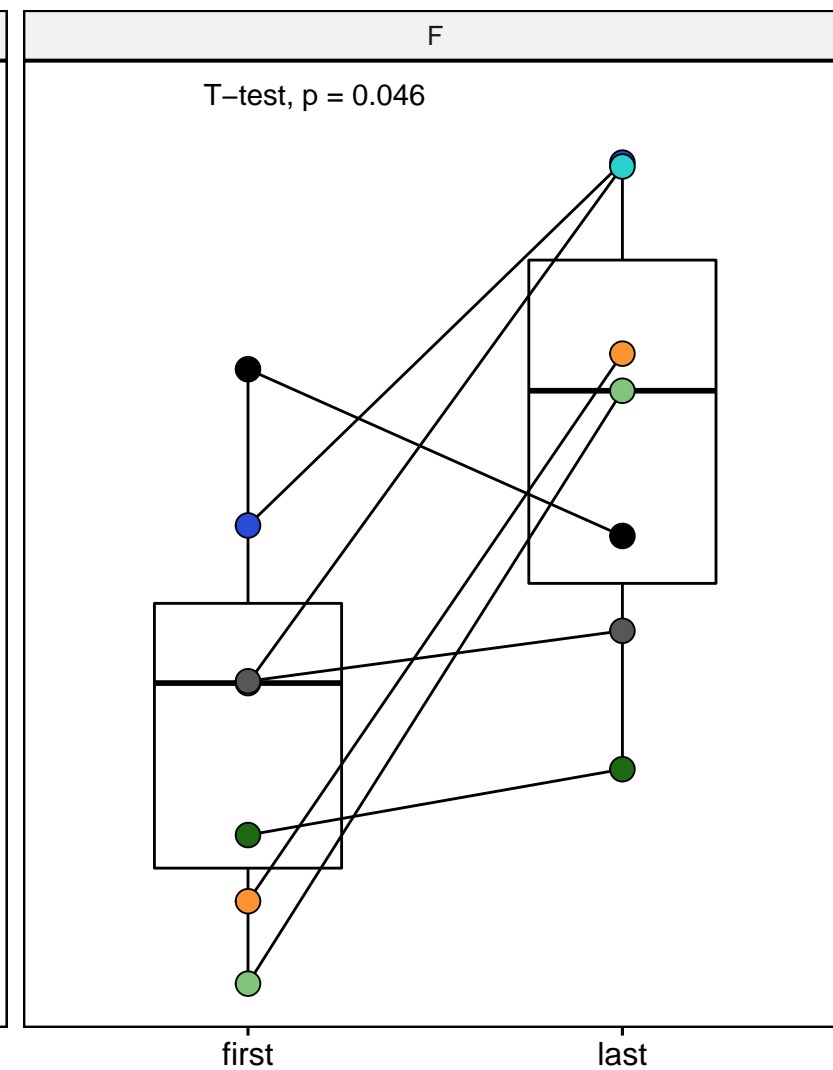

PatID

|                |                 |                |                |                |
|----------------|-----------------|----------------|----------------|----------------|
| ● 11_F68_8days | ● 18_F52_11days | ● 25_M87_3days | ● 30_M49_5days | ● 41_M70_6days |
| ● 12_F73_7days | ● 21_F53_9days  | ● 27_M71_4days | ● 32_F69_3days | ● 44_M57_5days |
| ● 13_M74_4days | ● 22_M65_3days  | ● 28_F53_6days | ● 40_F69_4days | ● 6_M79_8days  |

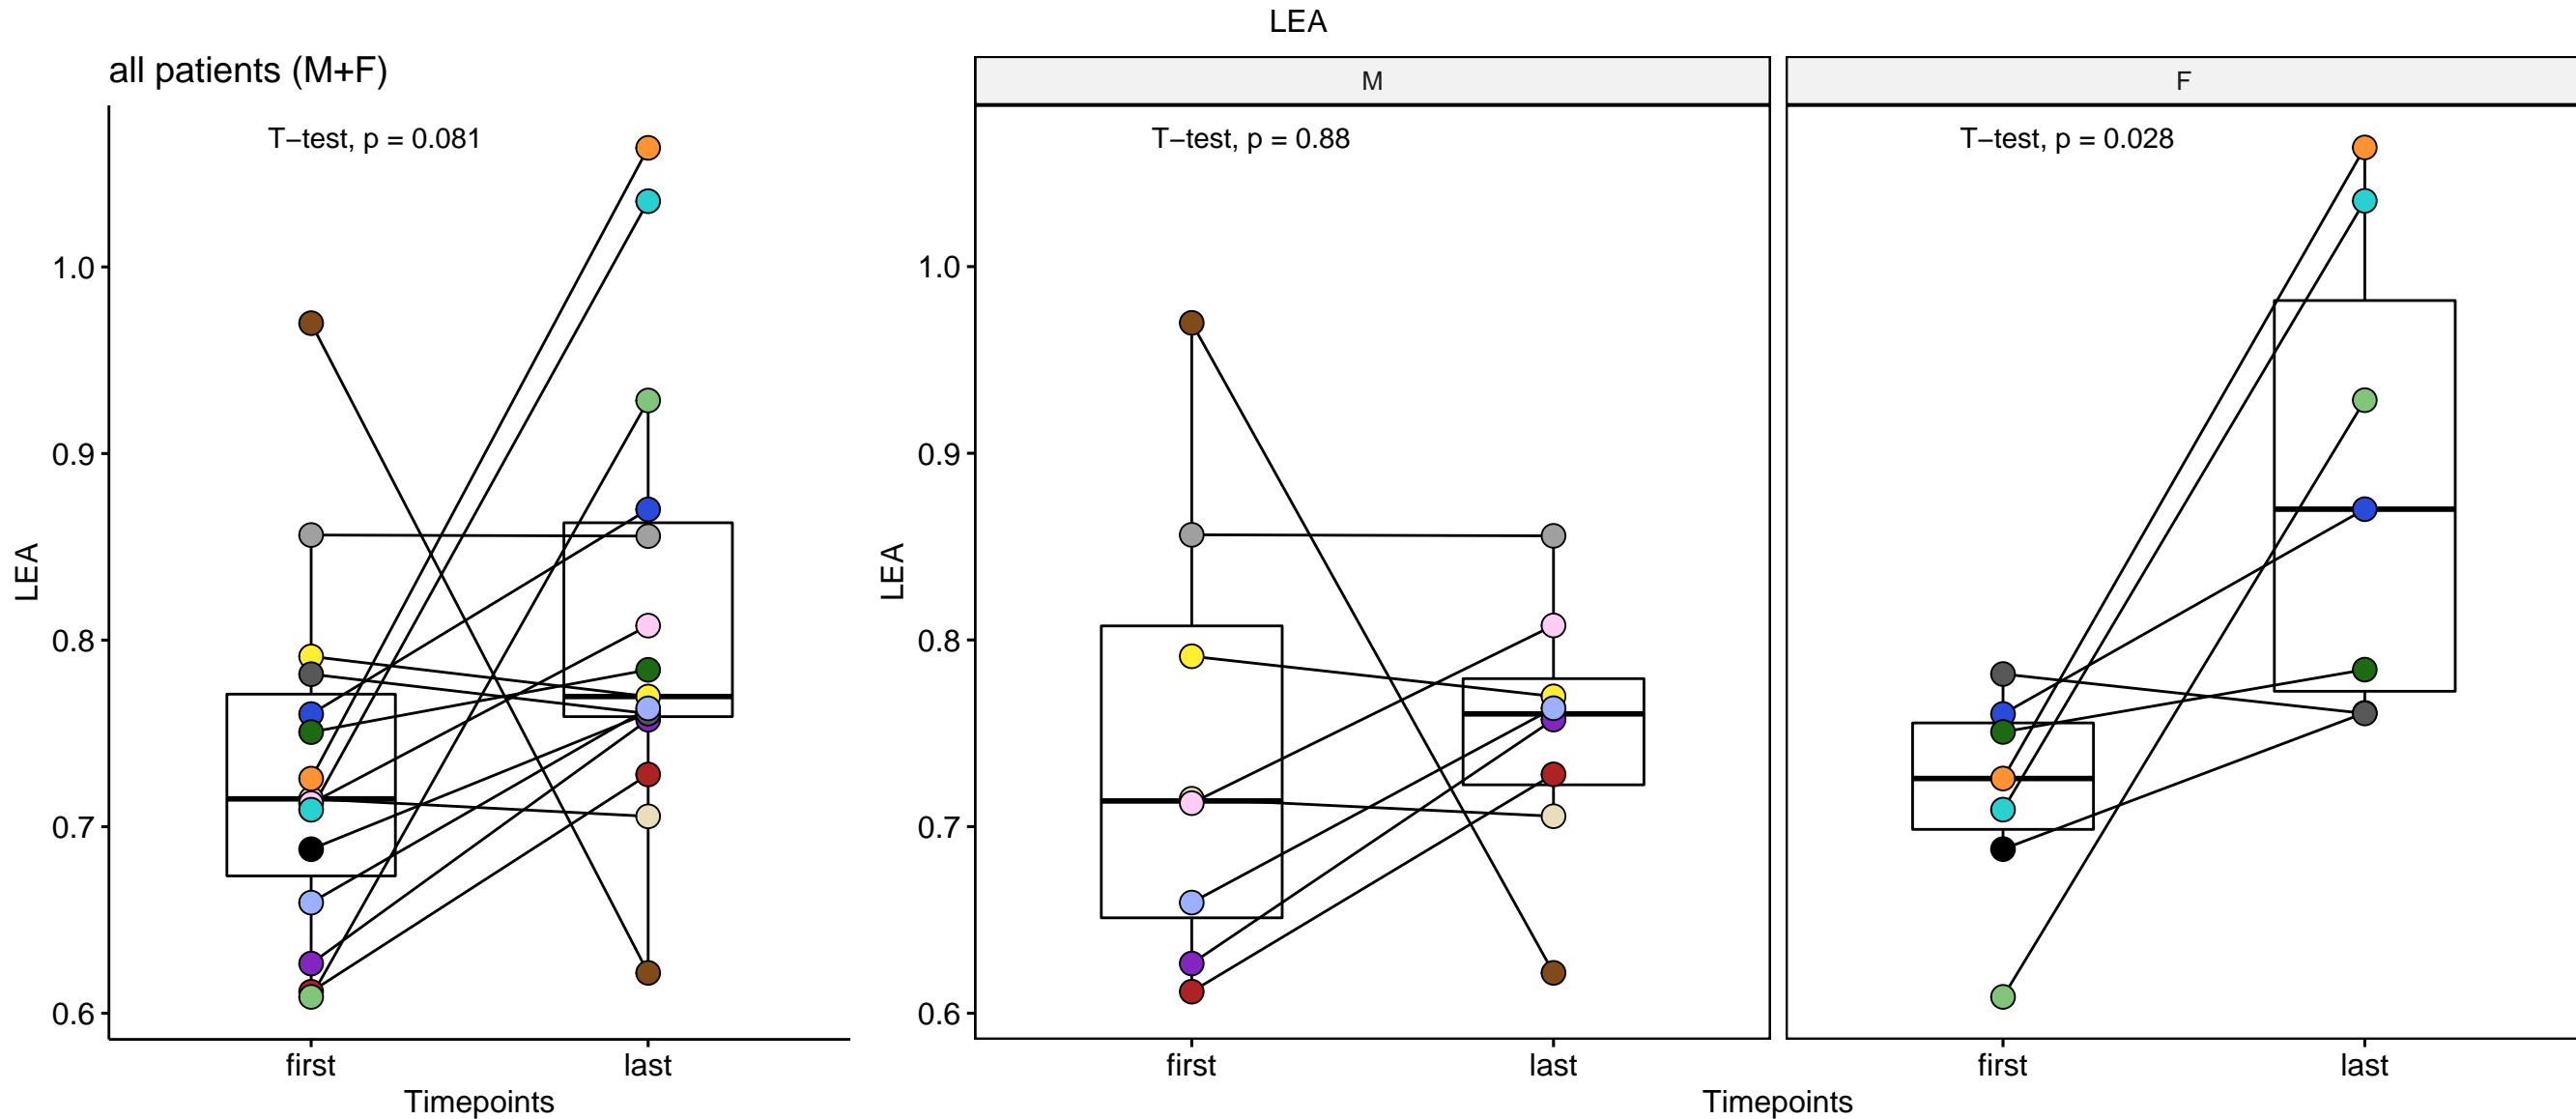

PatID

|              |               |              |              |              |
|--------------|---------------|--------------|--------------|--------------|
| 11_F68_8days | 18_F52_11days | 25_M87_3days | 30_M49_5days | 41_M70_6days |
| 12_F73_7days | 21_F53_9days  | 27_M71_4days | 32_F69_3days | 44_M57_5days |
| 13_M74_4days | 22_M65_3days  | 28_F53_6days | 40_F69_4days | 6_M79_8days  |

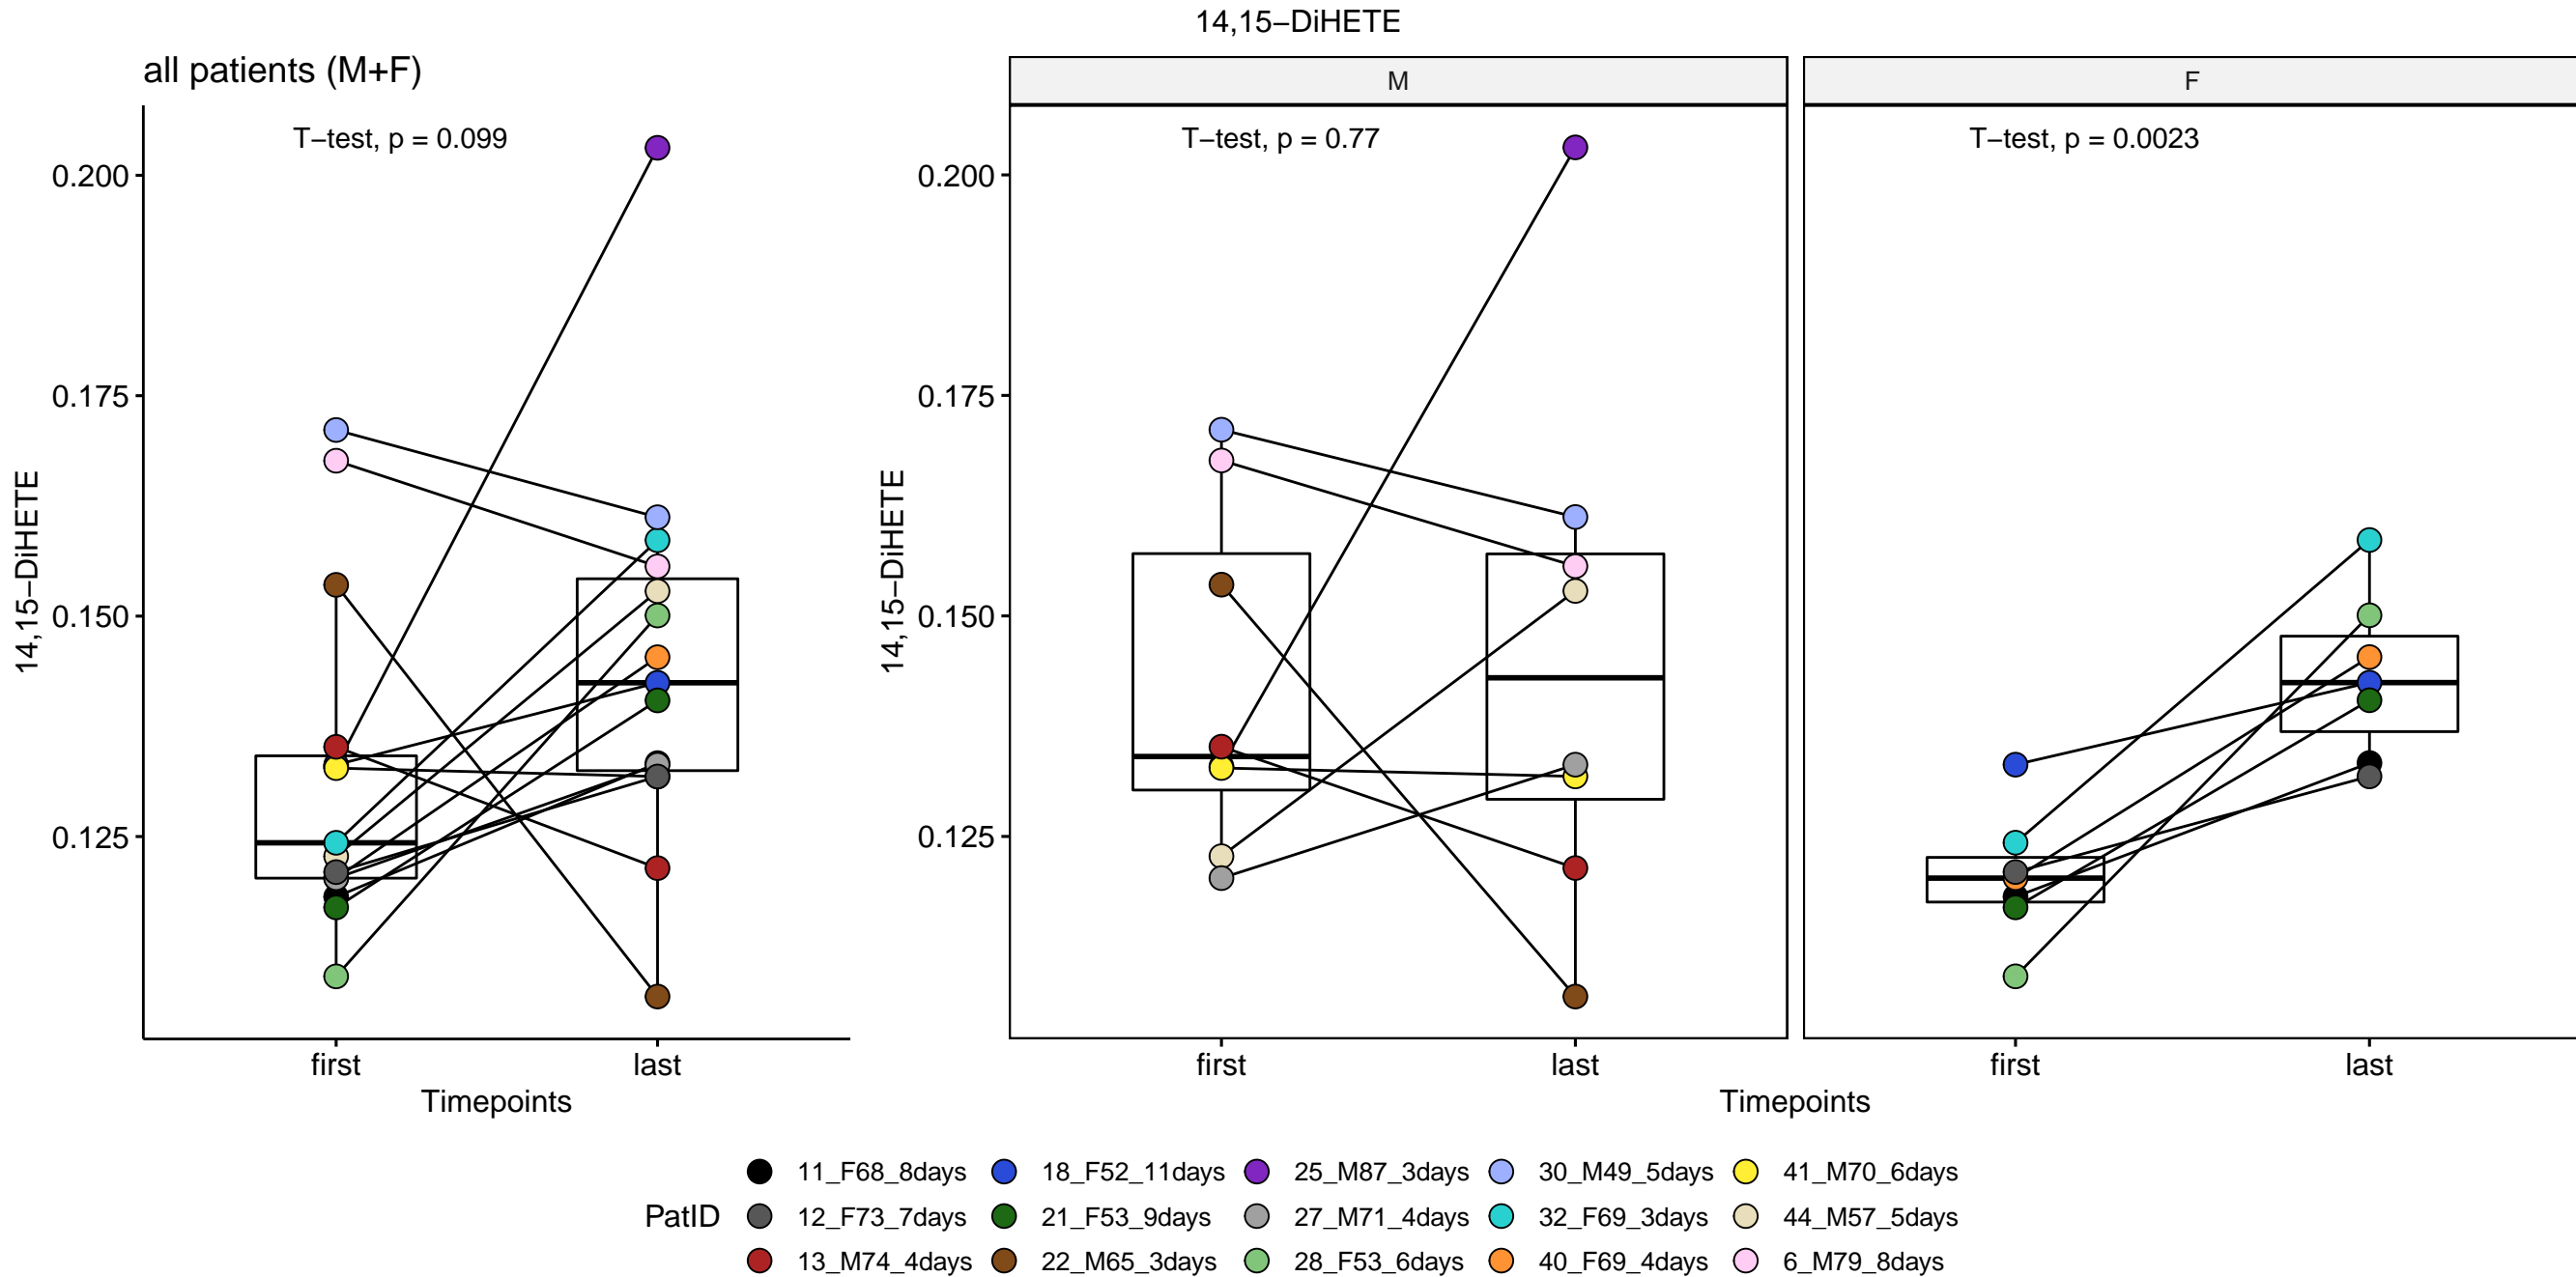

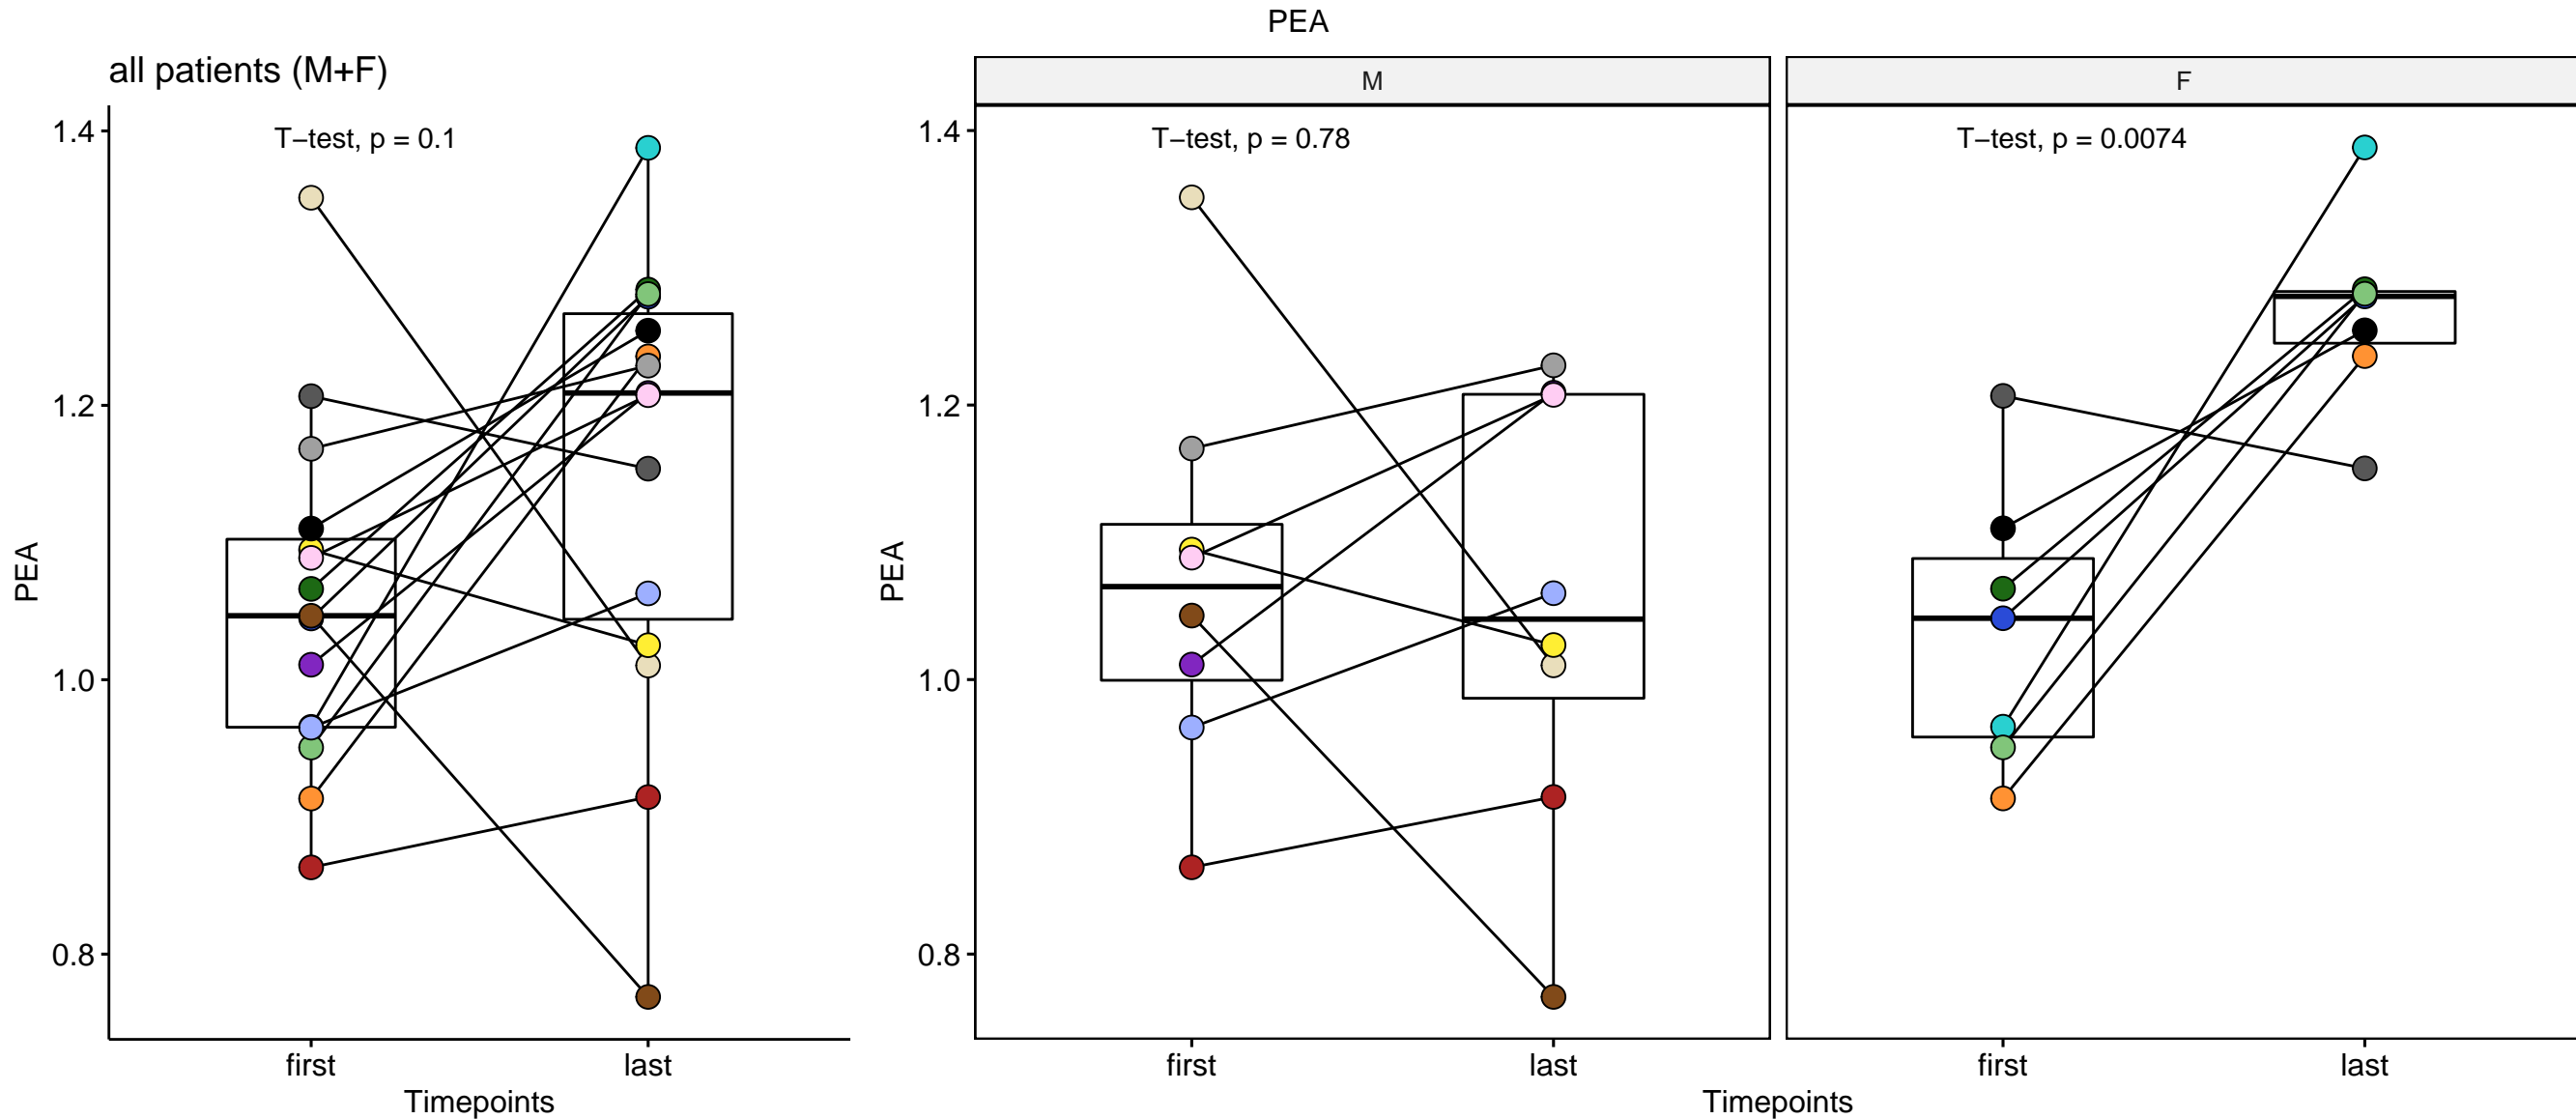

PatID

|              |               |              |              |              |
|--------------|---------------|--------------|--------------|--------------|
| 11_F68_8days | 18_F52_11days | 25_M87_3days | 30_M49_5days | 41_M70_6days |
| 12_F73_7days | 21_F53_9days  | 27_M71_4days | 32_F69_3days | 44_M57_5days |
| 13_M74_4days | 22_M65_3days  | 28_F53_6days | 40_F69_4days | 6_M79_8days  |

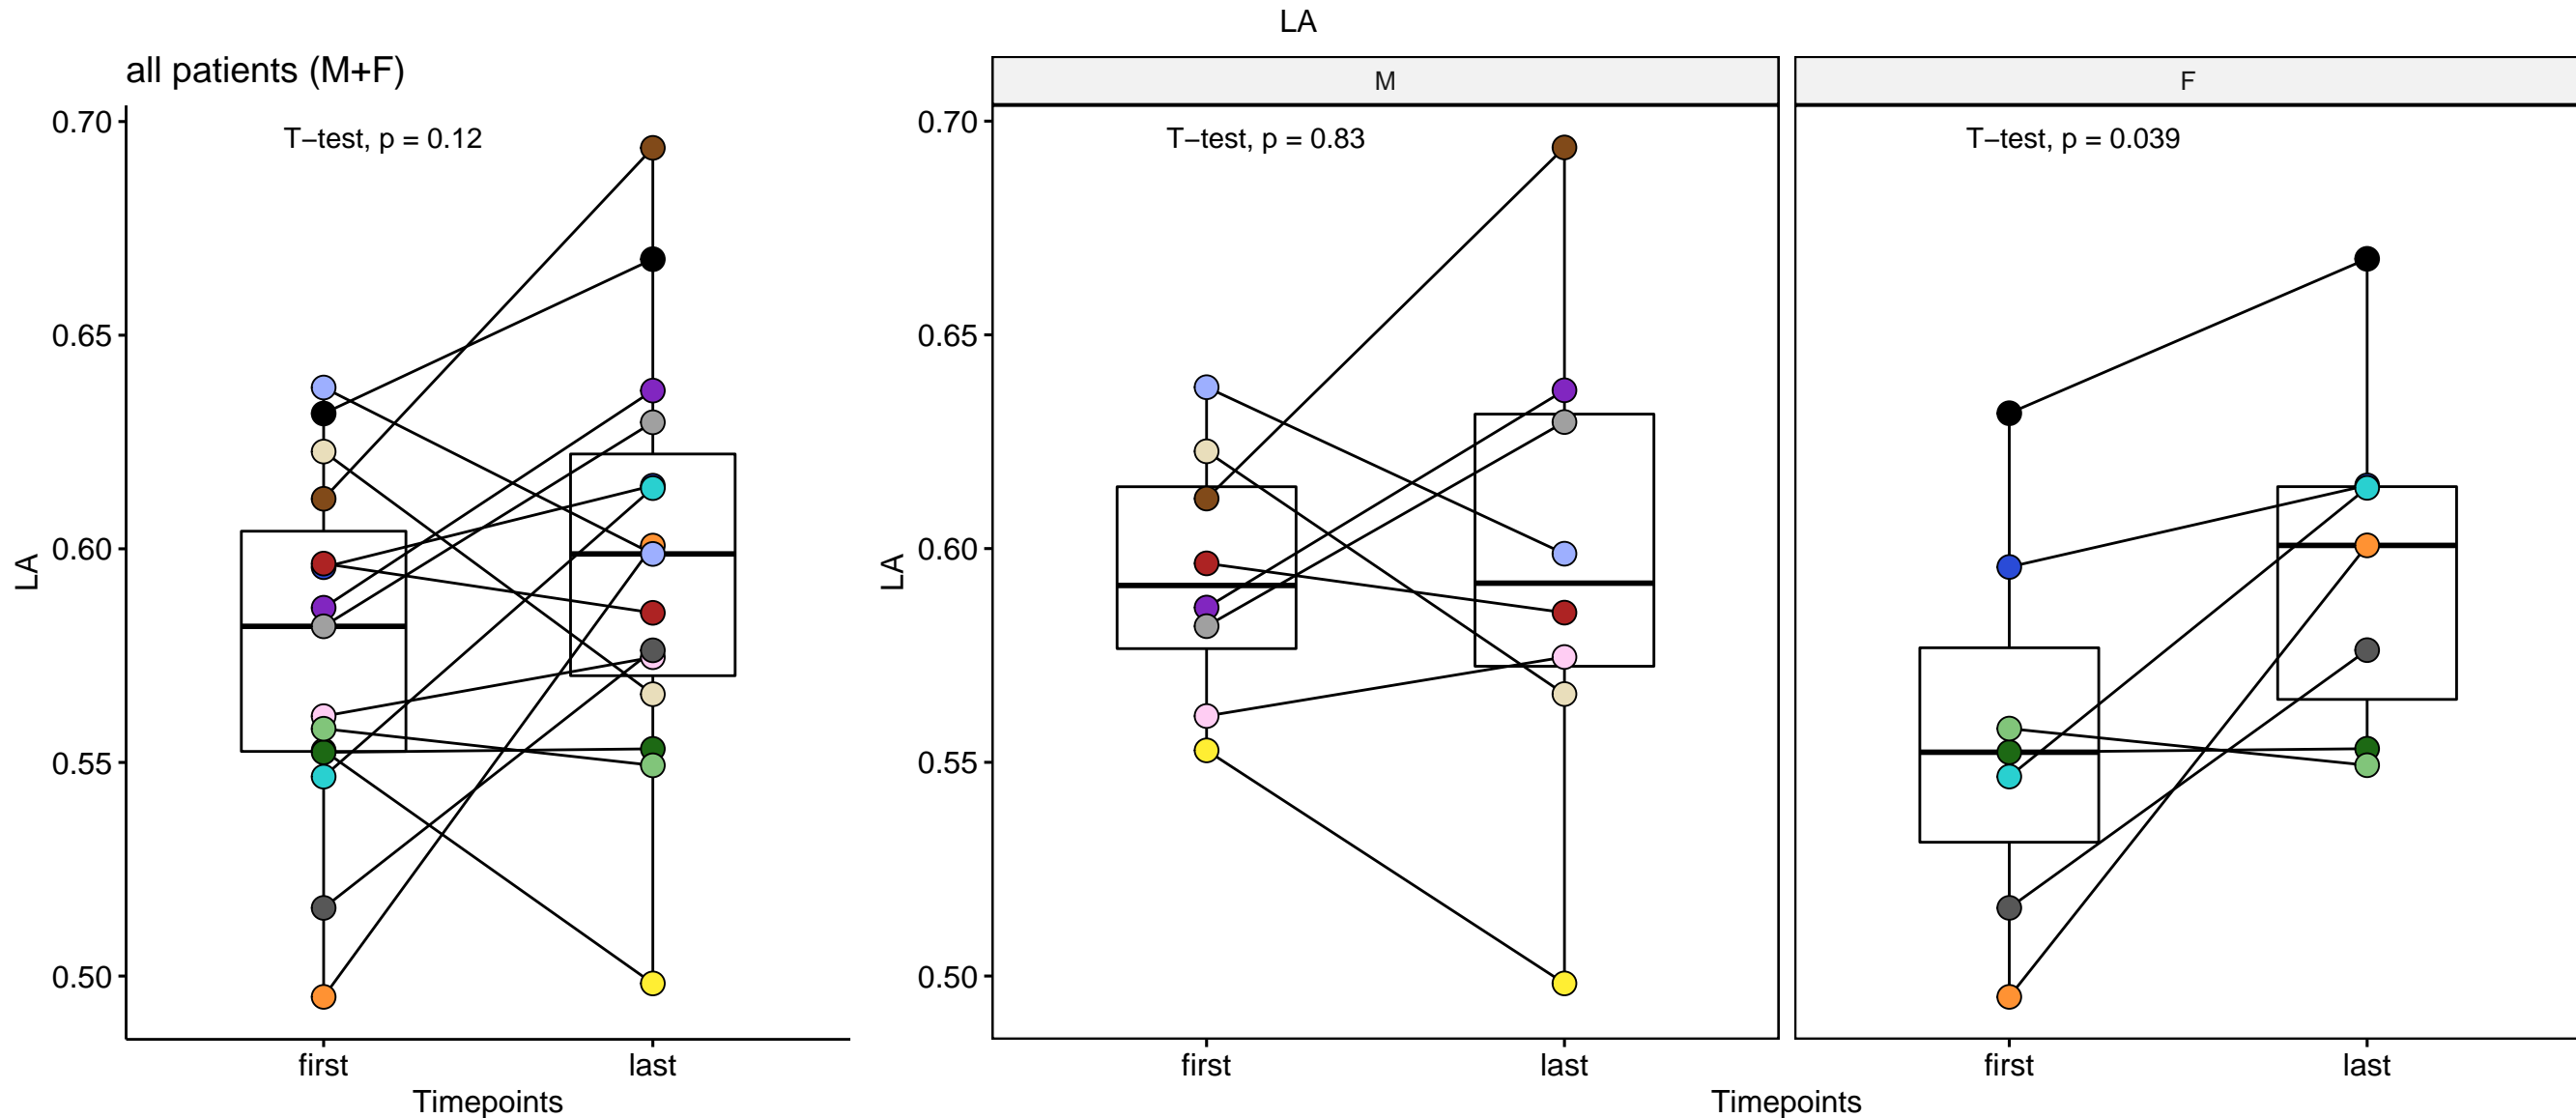

PatID

|              |               |              |              |              |
|--------------|---------------|--------------|--------------|--------------|
| 11_F68_8days | 18_F52_11days | 25_M87_3days | 30_M49_5days | 41_M70_6days |
| 12_F73_7days | 21_F53_9days  | 27_M71_4days | 32_F69_3days | 44_M57_5days |
| 13_M74_4days | 22_M65_3days  | 28_F53_6days | 40_F69_4days | 6_M79_8days  |

# DGLEA

all patients (M+F)

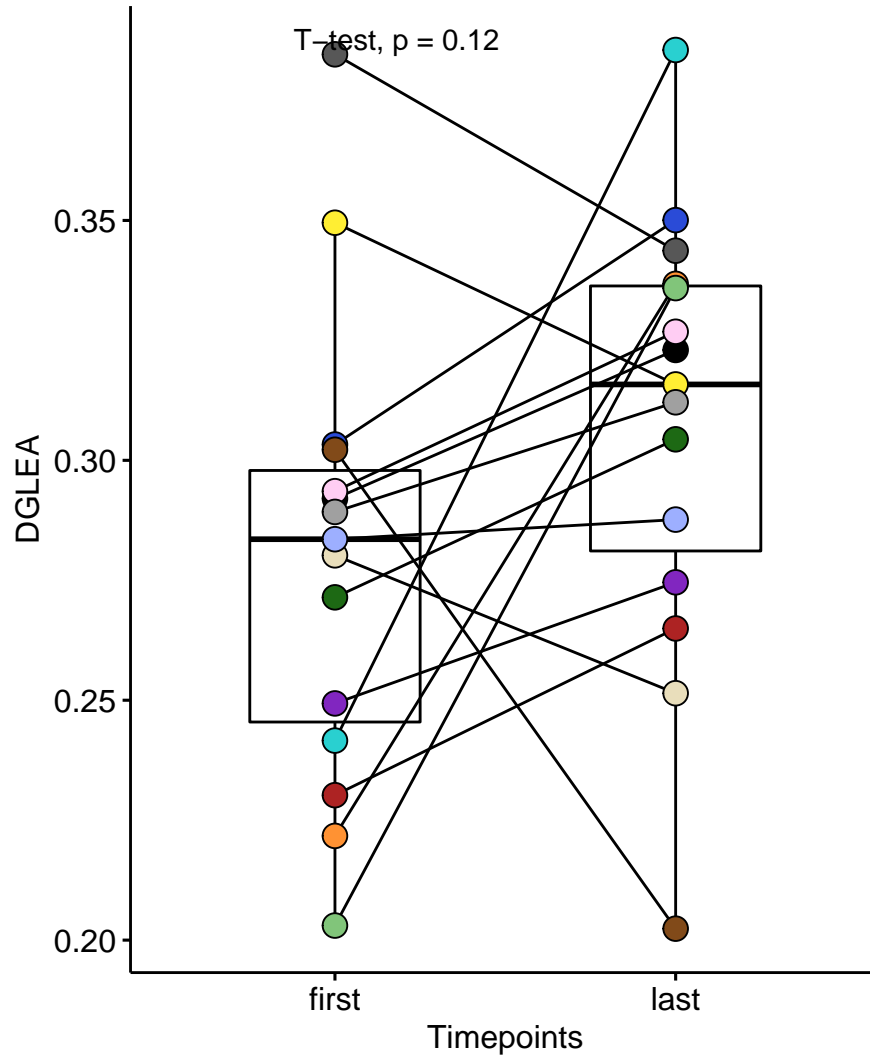

T-test, p = 0.76

DGLEA

first last

Timepoints

M

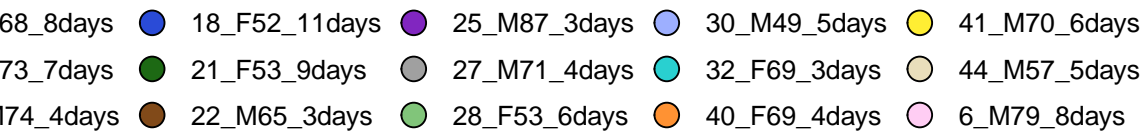

F

T-test, p = 0.041

first last

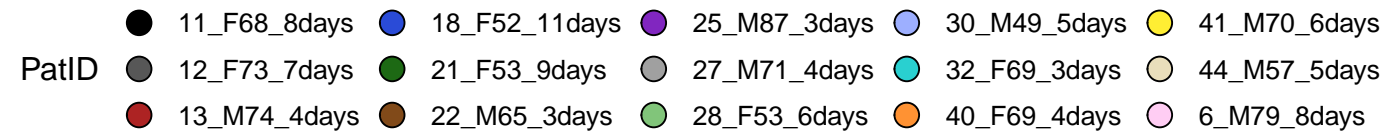

# 8iso-PGE2

all patients (M+F)

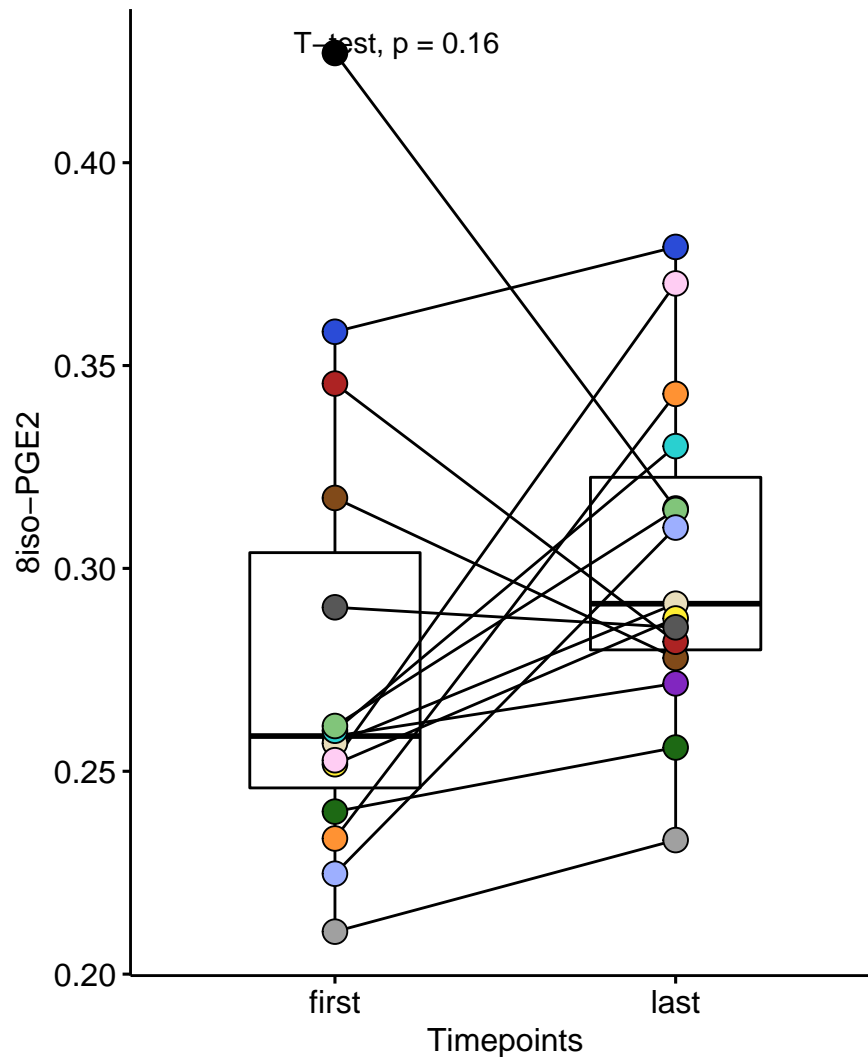

M

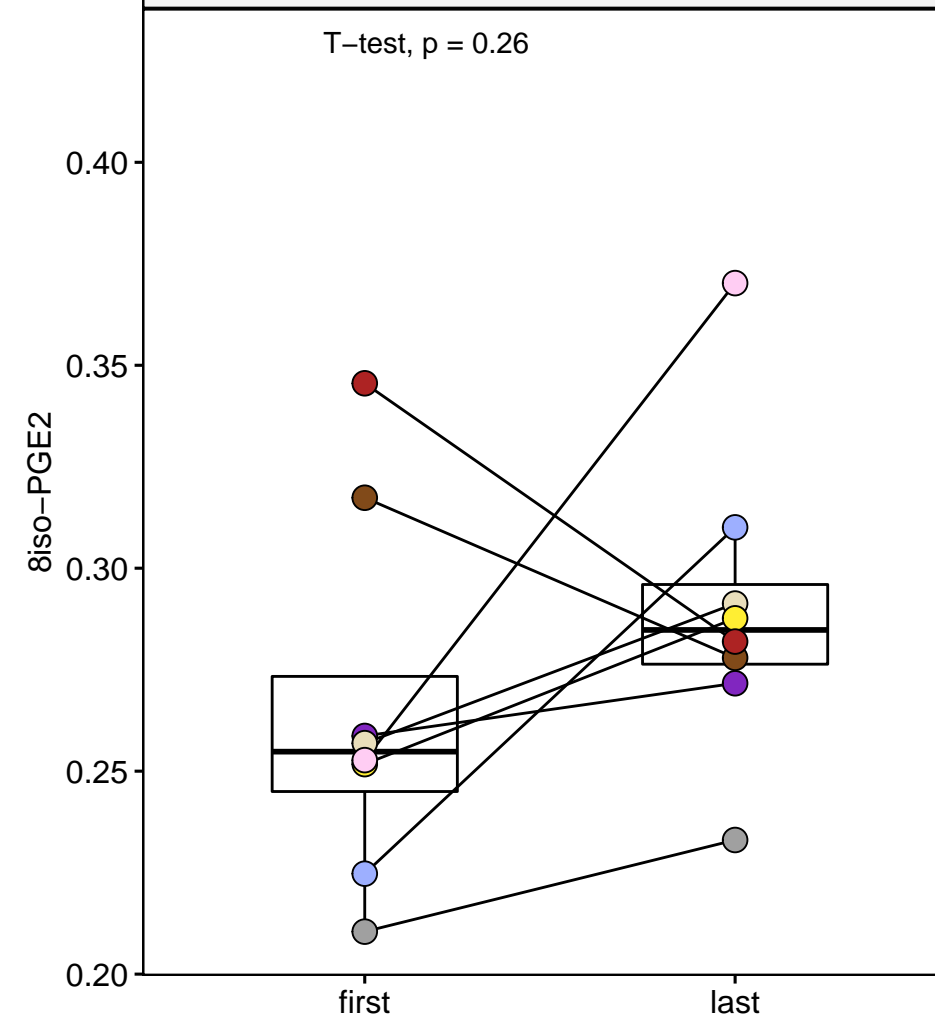

F

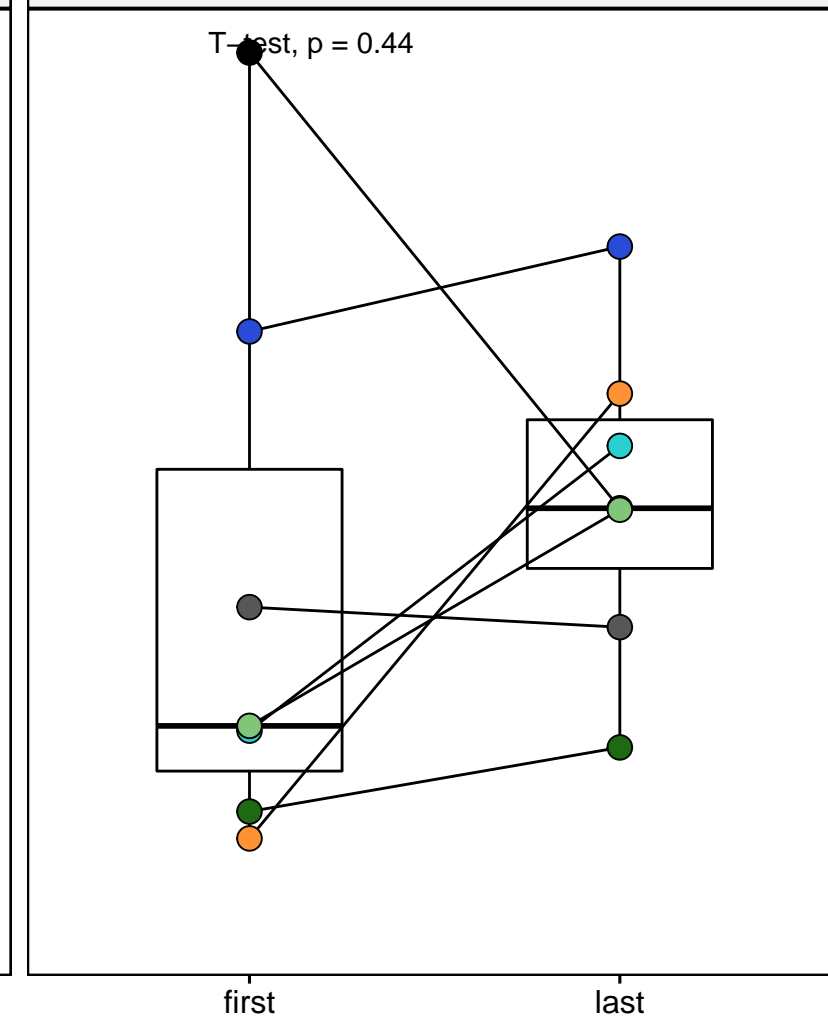

PatID

|                |                 |                |                |                |
|----------------|-----------------|----------------|----------------|----------------|
| ● 11_F68_8days | ● 18_F52_11days | ● 25_M87_3days | ● 30_M49_5days | ● 41_M70_6days |
| ● 12_F73_7days | ● 21_F53_9days  | ● 27_M71_4days | ● 32_F69_3days | ● 44_M57_5days |
| ● 13_M74_4days | ● 22_M65_3days  | ● 28_F53_6days | ● 40_F69_4days | ● 6_M79_8days  |



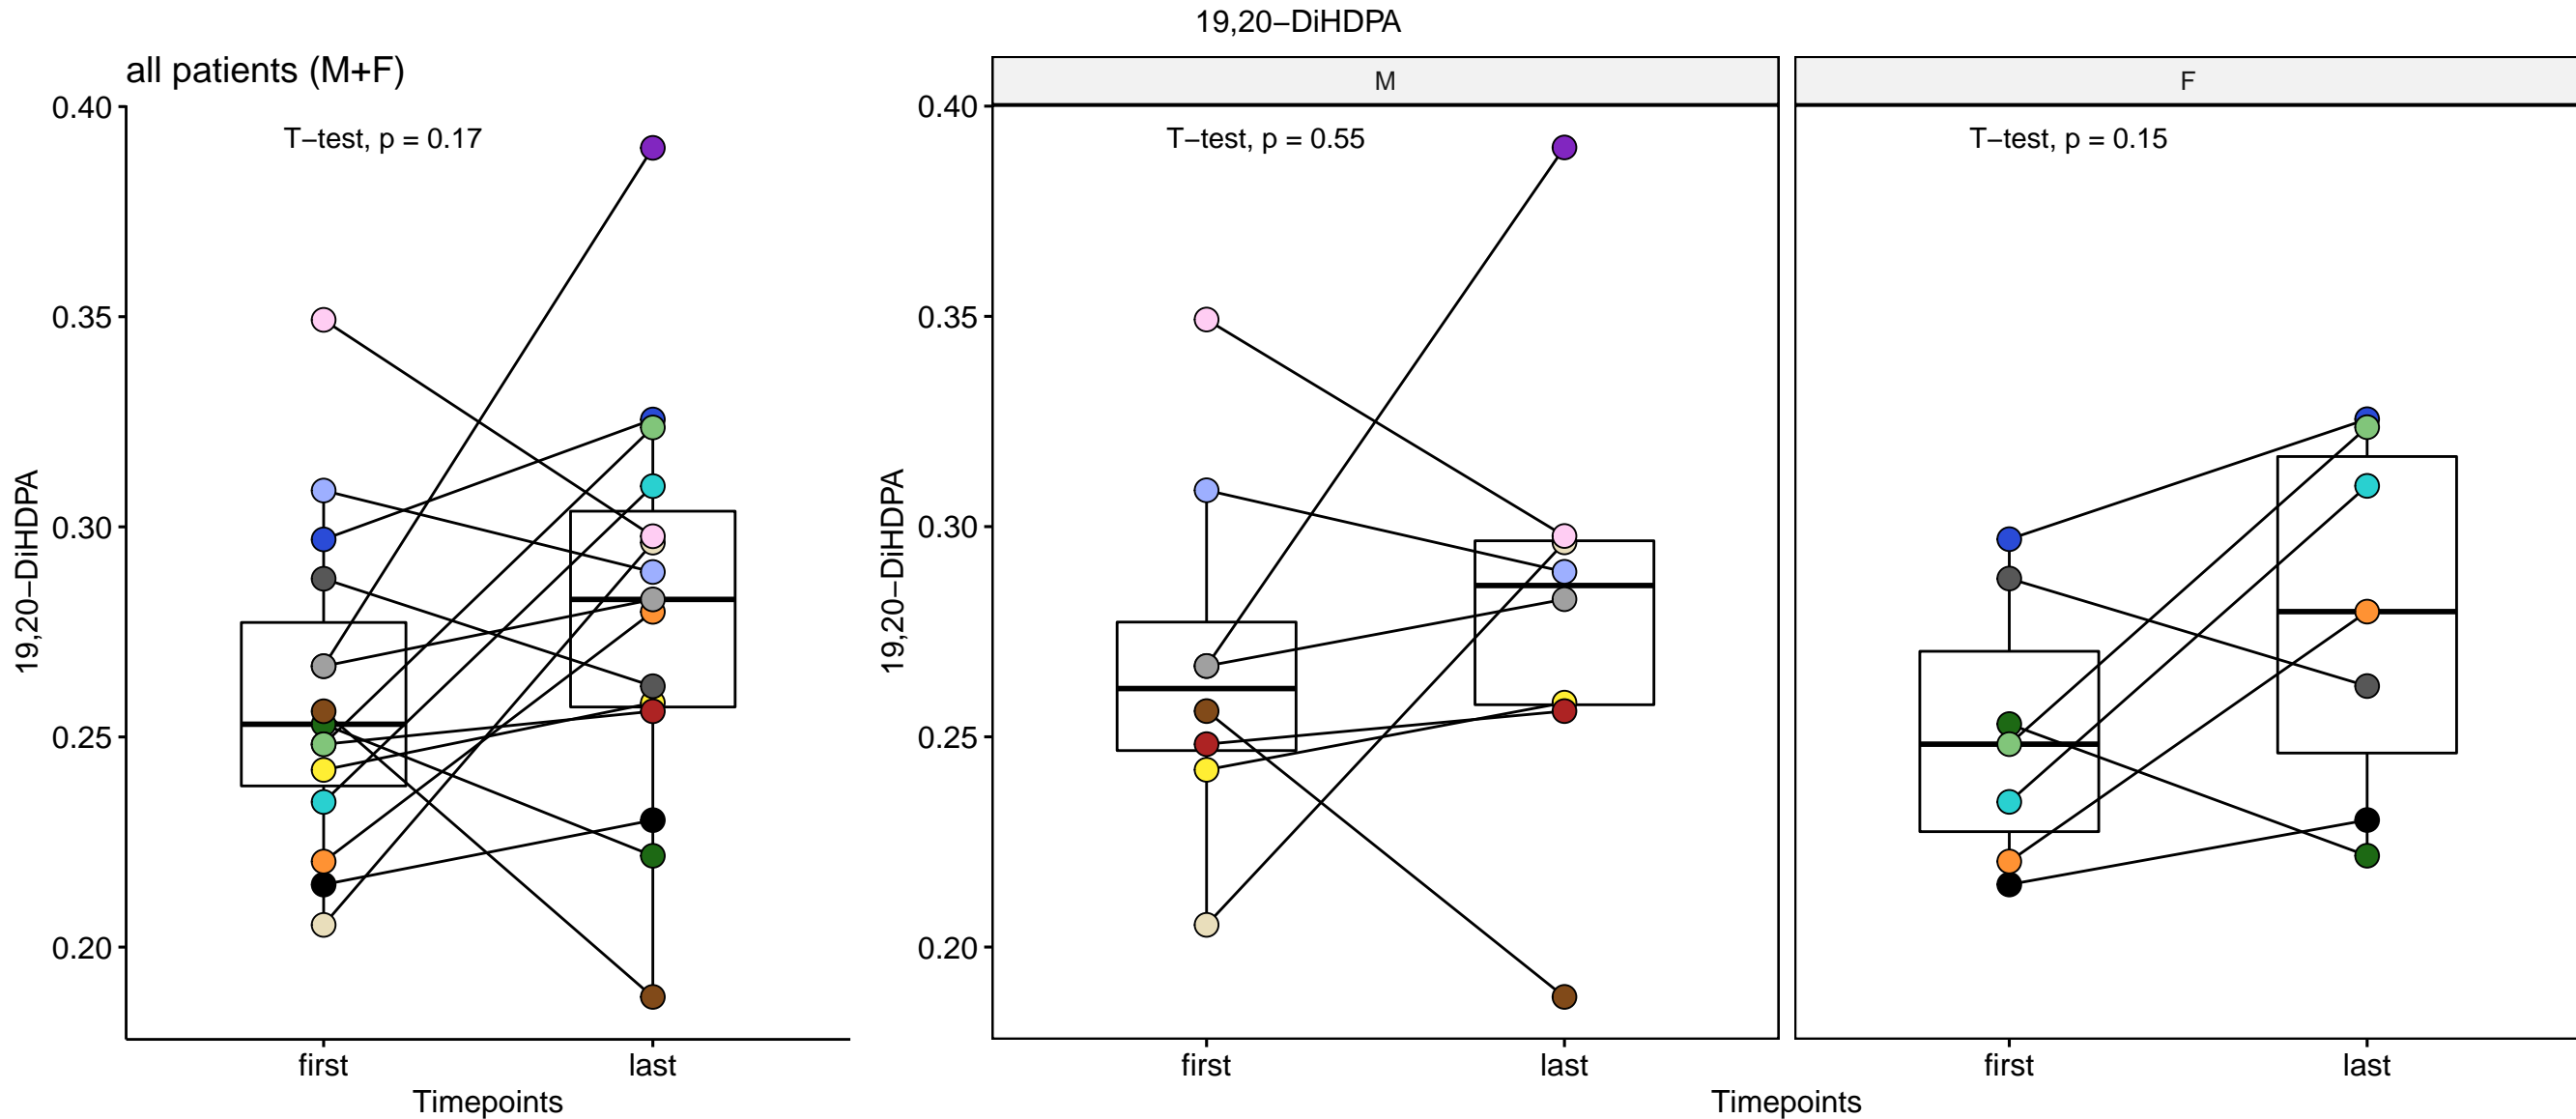

PatID

|              |               |              |              |              |
|--------------|---------------|--------------|--------------|--------------|
| 11_F68_8days | 18_F52_11days | 25_M87_3days | 30_M49_5days | 41_M70_6days |
| 12_F73_7days | 21_F53_9days  | 27_M71_4days | 32_F69_3days | 44_M57_5days |
| 13_M74_4days | 22_M65_3days  | 28_F53_6days | 40_F69_4days | 6_M79_8days  |

all patients (M+F)

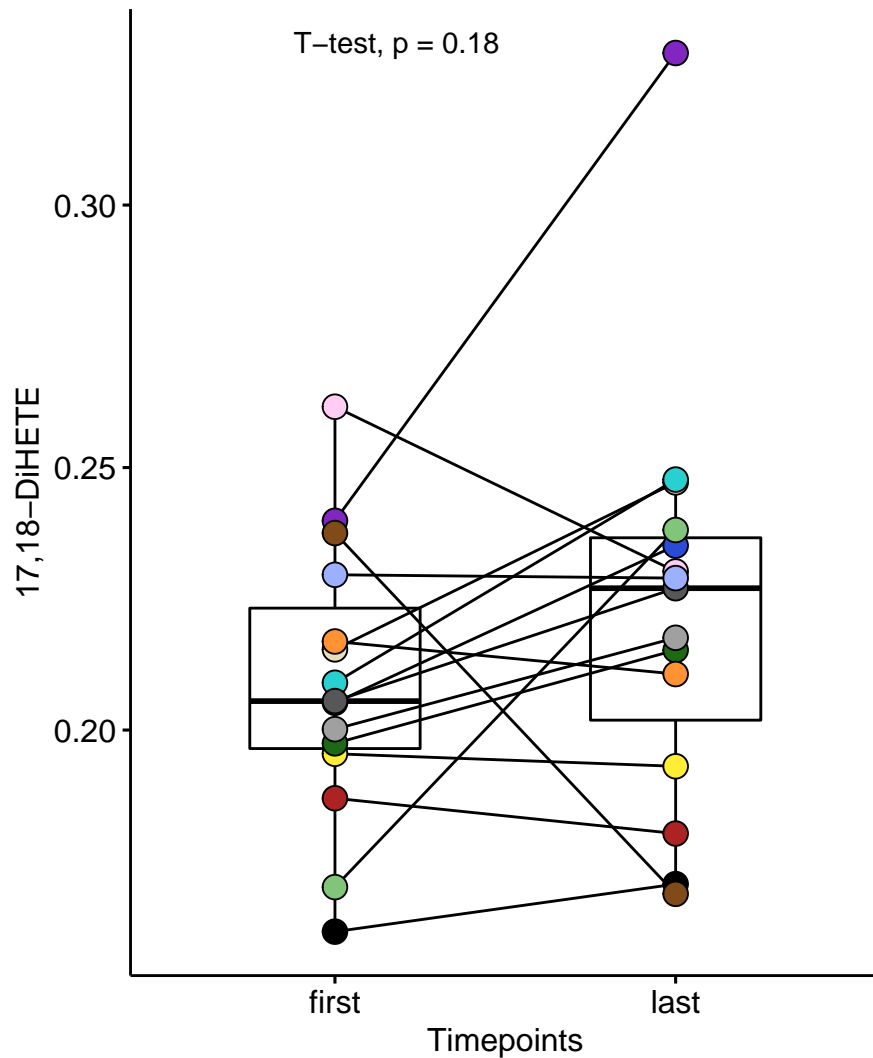

17,18-DiHETE

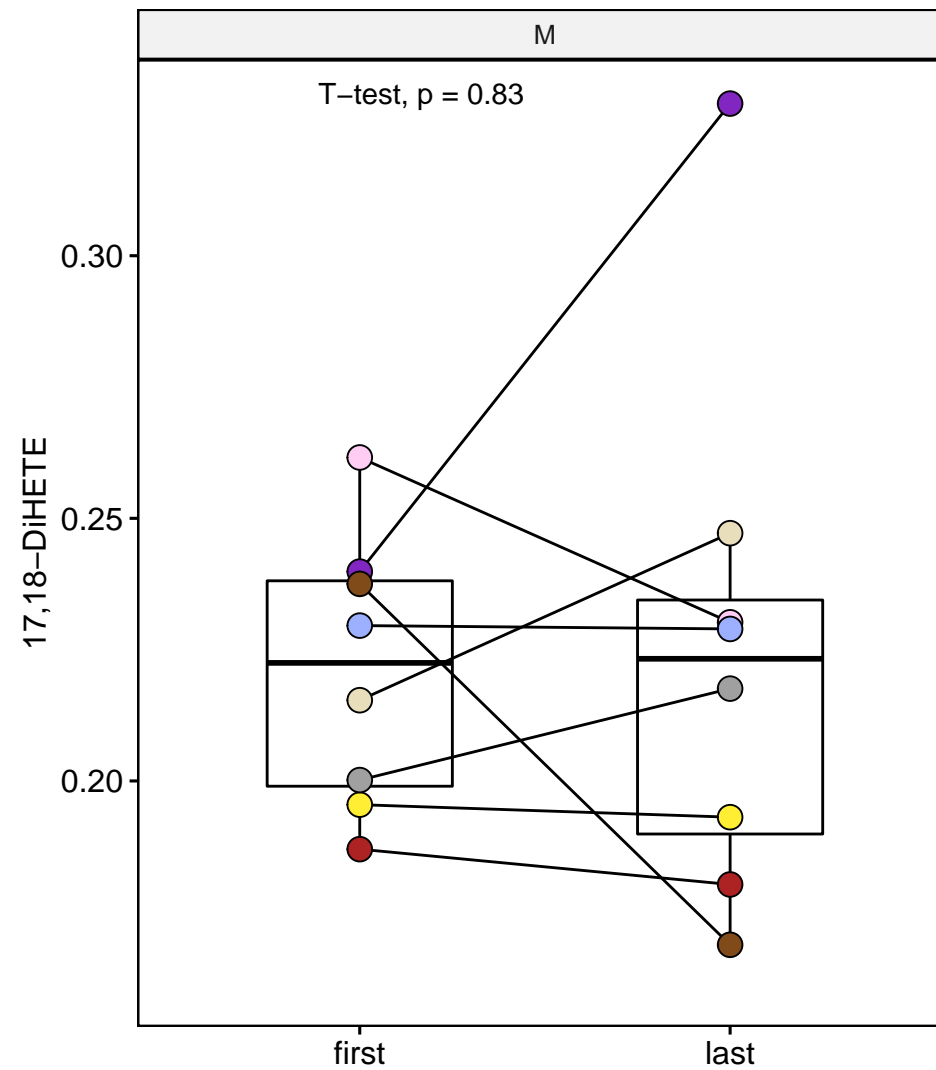

F

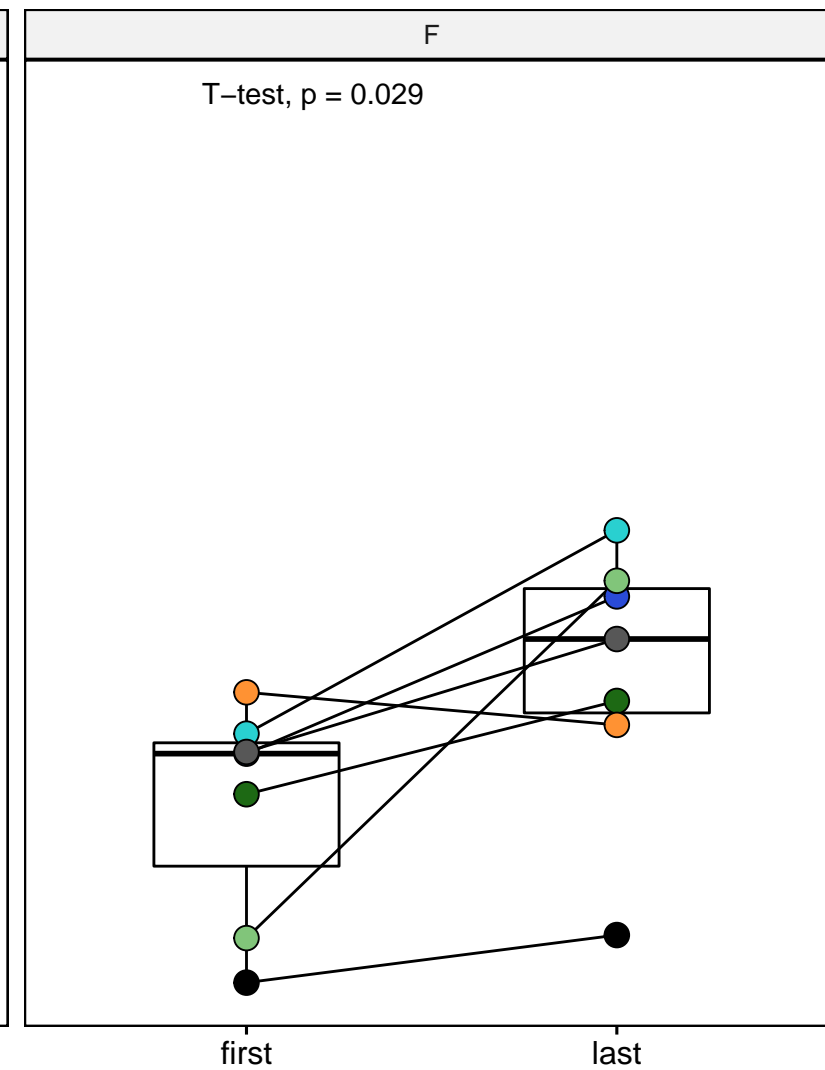

PatID

|                |                 |                |                |                |
|----------------|-----------------|----------------|----------------|----------------|
| ● 11_F68_8days | ● 18_F52_11days | ● 25_M87_3days | ● 30_M49_5days | ● 41_M70_6days |
| ● 12_F73_7days | ● 21_F53_9days  | ● 27_M71_4days | ● 32_F69_3days | ● 44_M57_5days |
| ● 13_M74_4days | ● 22_M65_3days  | ● 28_F53_6days | ● 40_F69_4days | ● 6_M79_8days  |

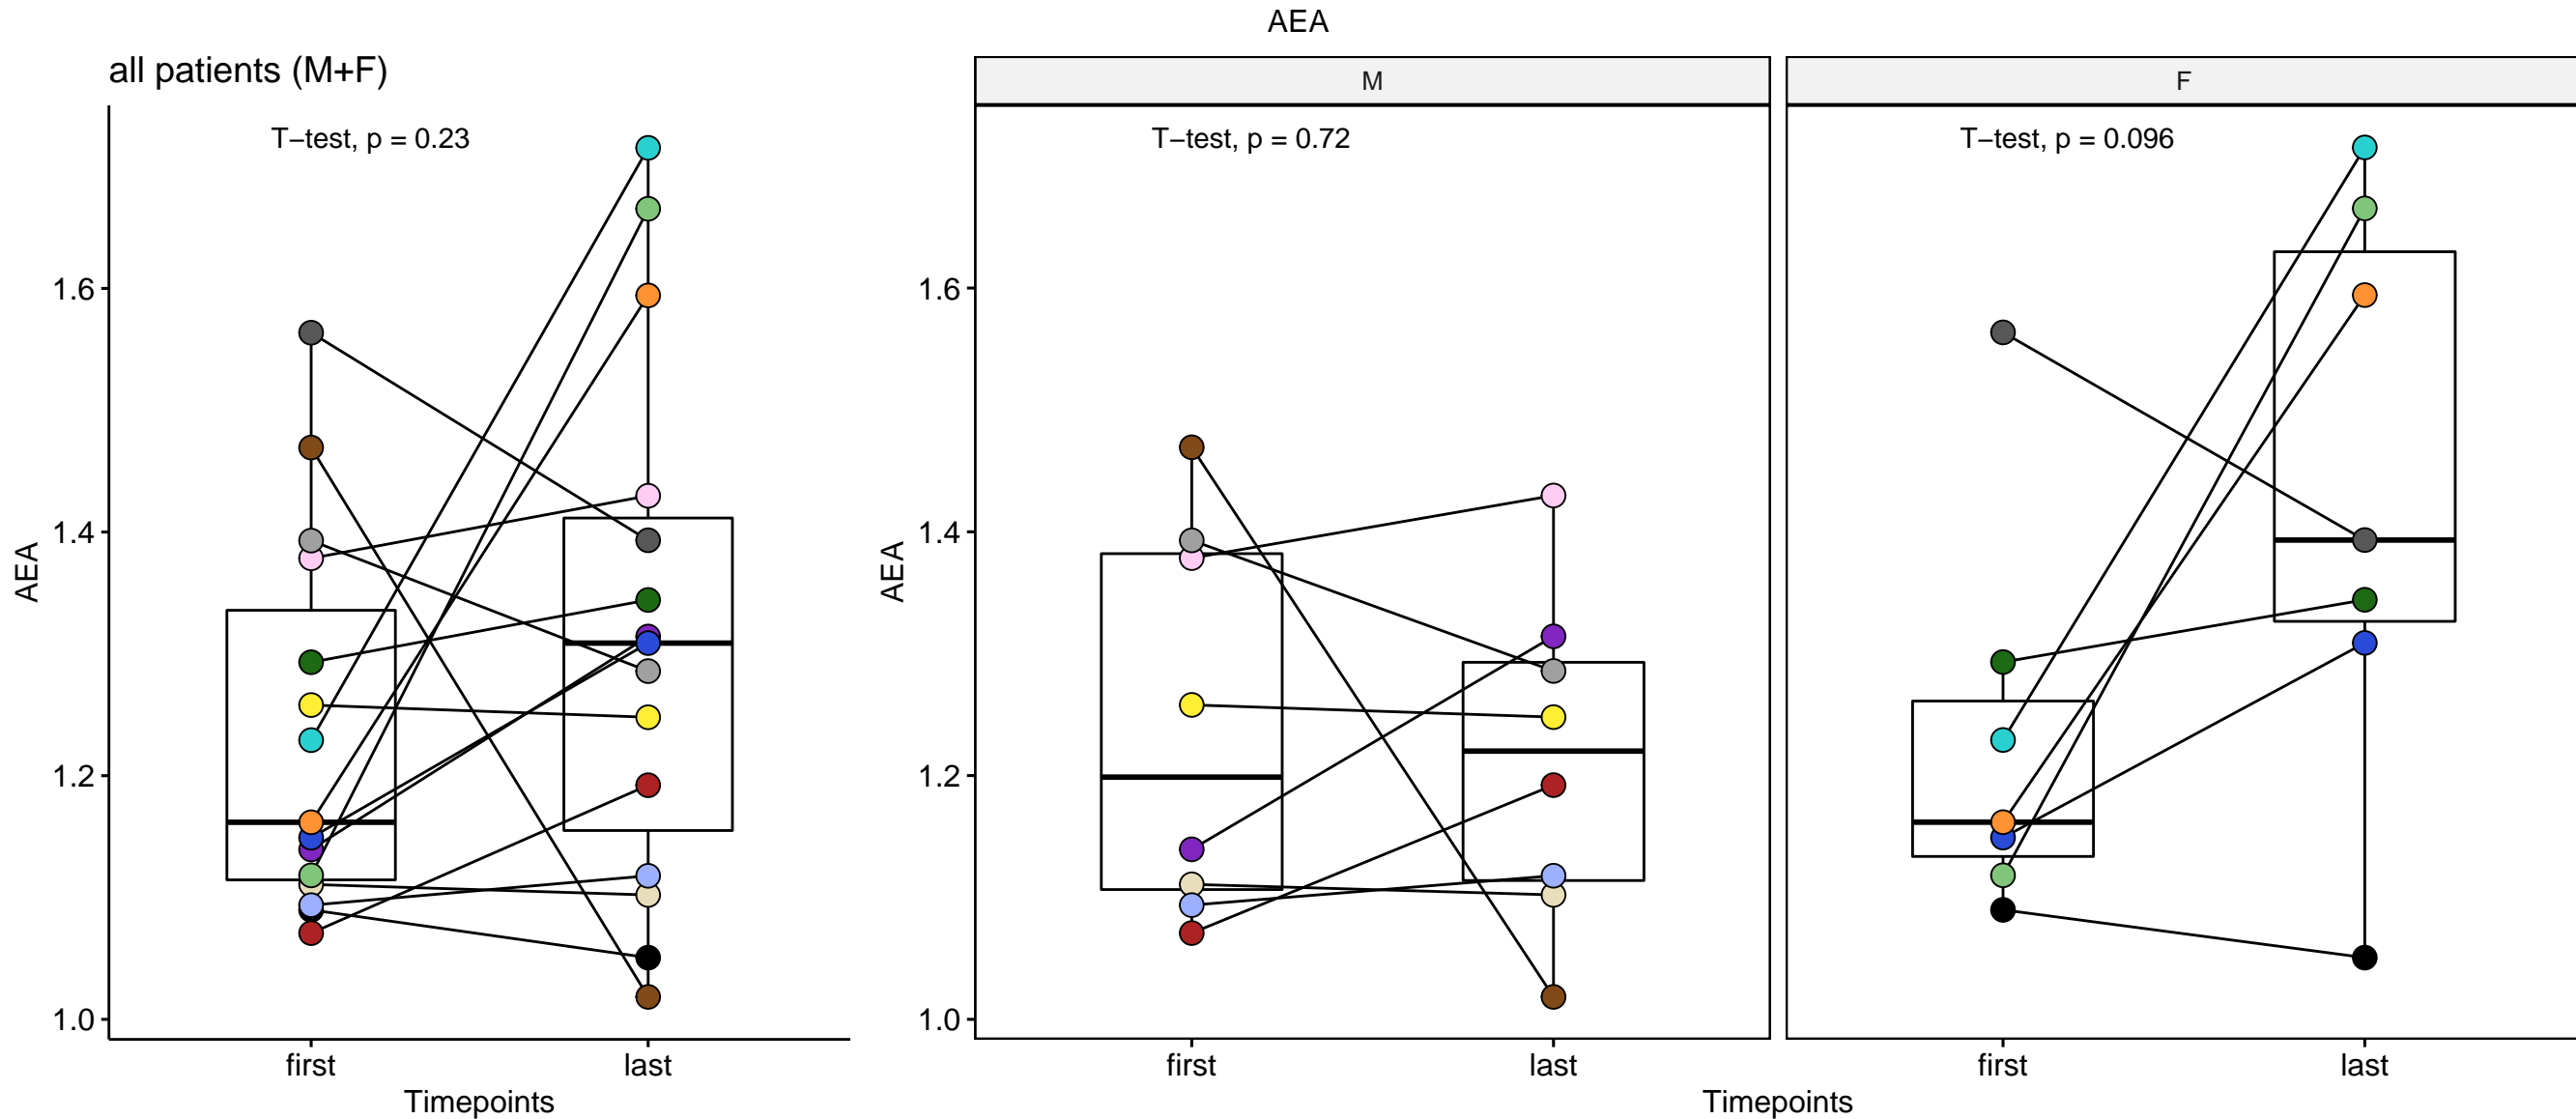

PatID

|              |               |              |              |              |
|--------------|---------------|--------------|--------------|--------------|
| 11_F68_8days | 18_F52_11days | 25_M87_3days | 30_M49_5days | 41_M70_6days |
| 12_F73_7days | 21_F53_9days  | 27_M71_4days | 32_F69_3days | 44_M57_5days |
| 13_M74_4days | 22_M65_3days  | 28_F53_6days | 40_F69_4days | 6_M79_8days  |

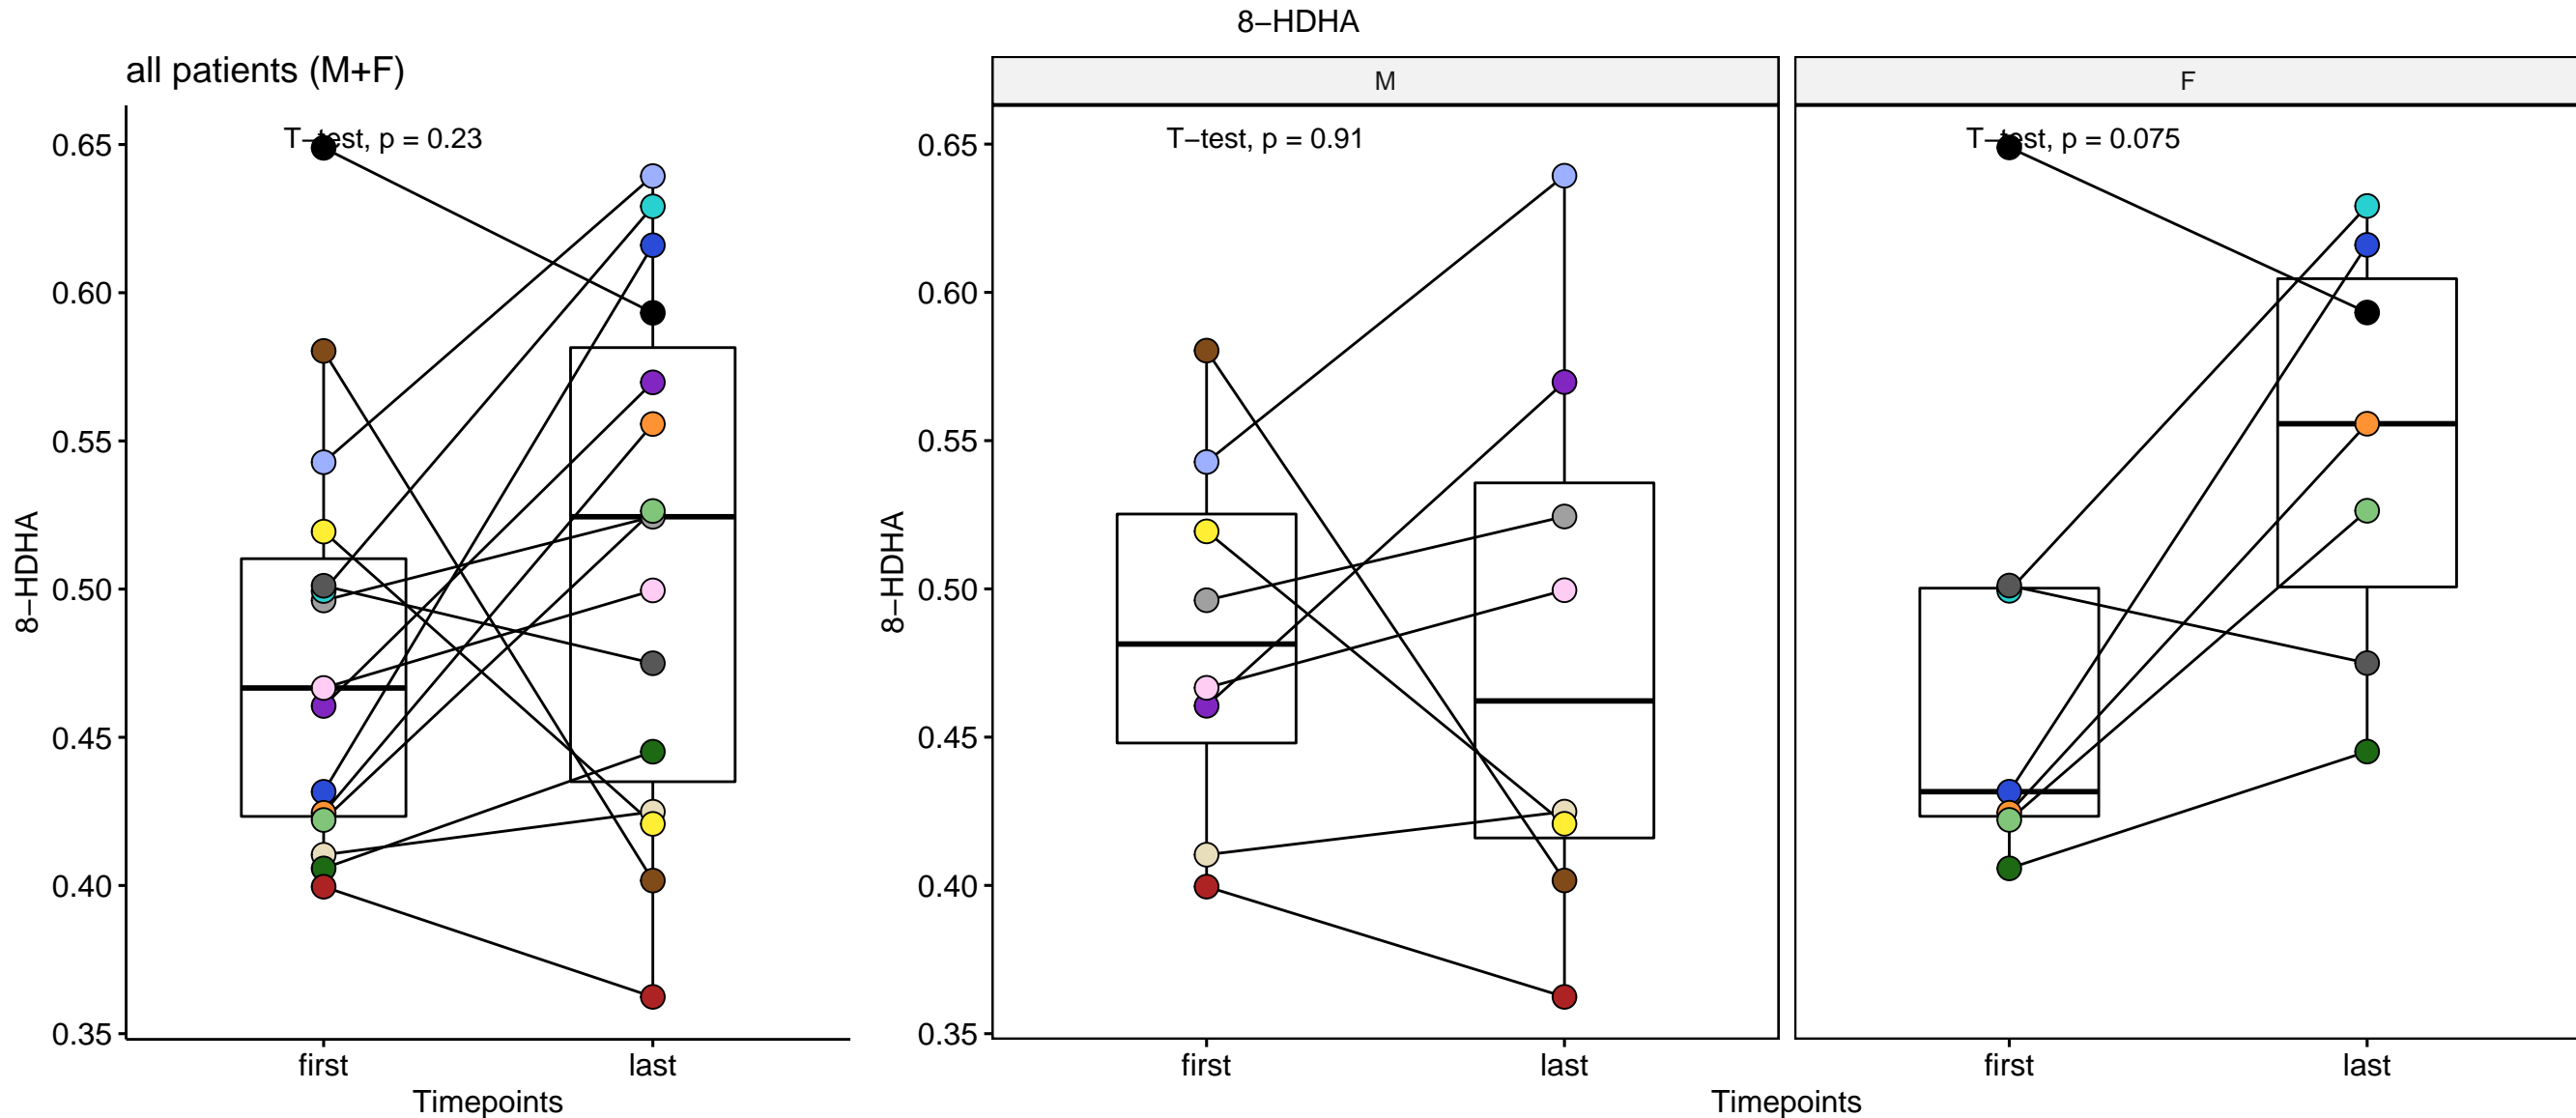

PatID

|              |               |              |              |              |
|--------------|---------------|--------------|--------------|--------------|
| 11_F68_8days | 18_F52_11days | 25_M87_3days | 30_M49_5days | 41_M70_6days |
| 12_F73_7days | 21_F53_9days  | 27_M71_4days | 32_F69_3days | 44_M57_5days |
| 13_M74_4days | 22_M65_3days  | 28_F53_6days | 40_F69_4days | 6_M79_8days  |

all patients (M+F)

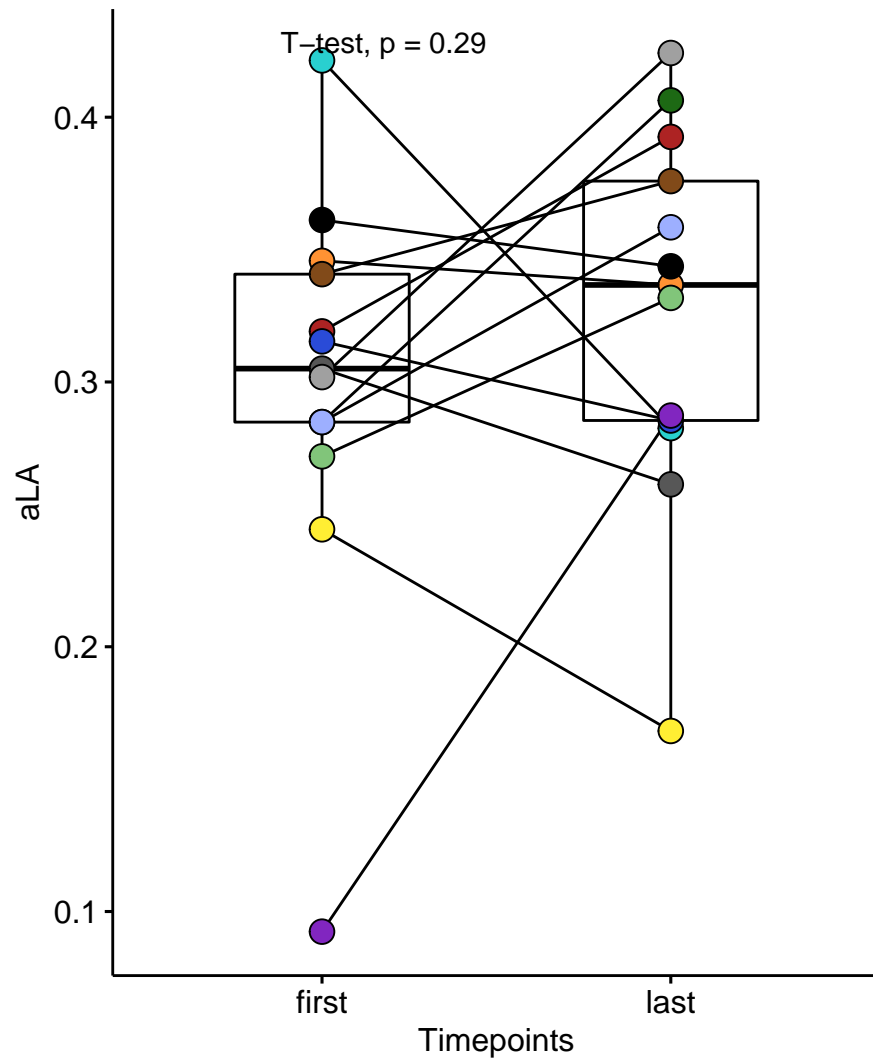

aLA

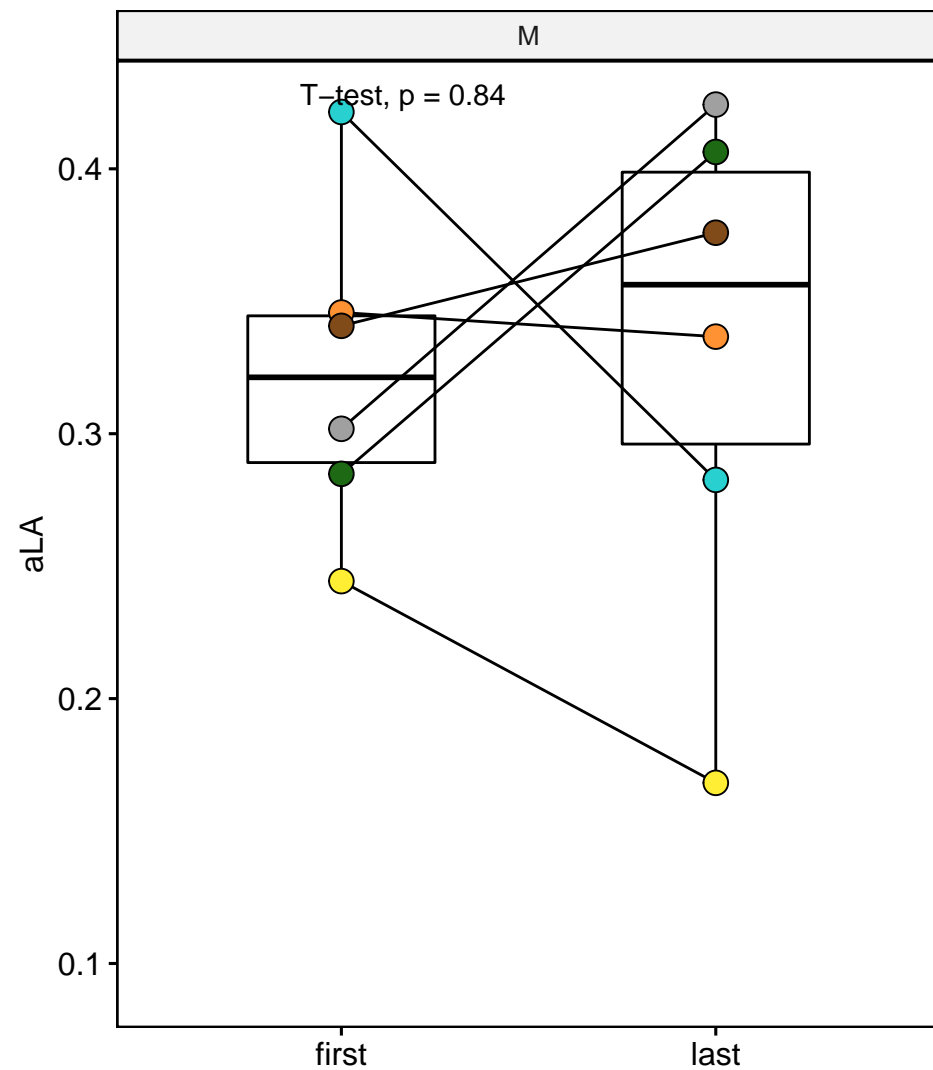

F

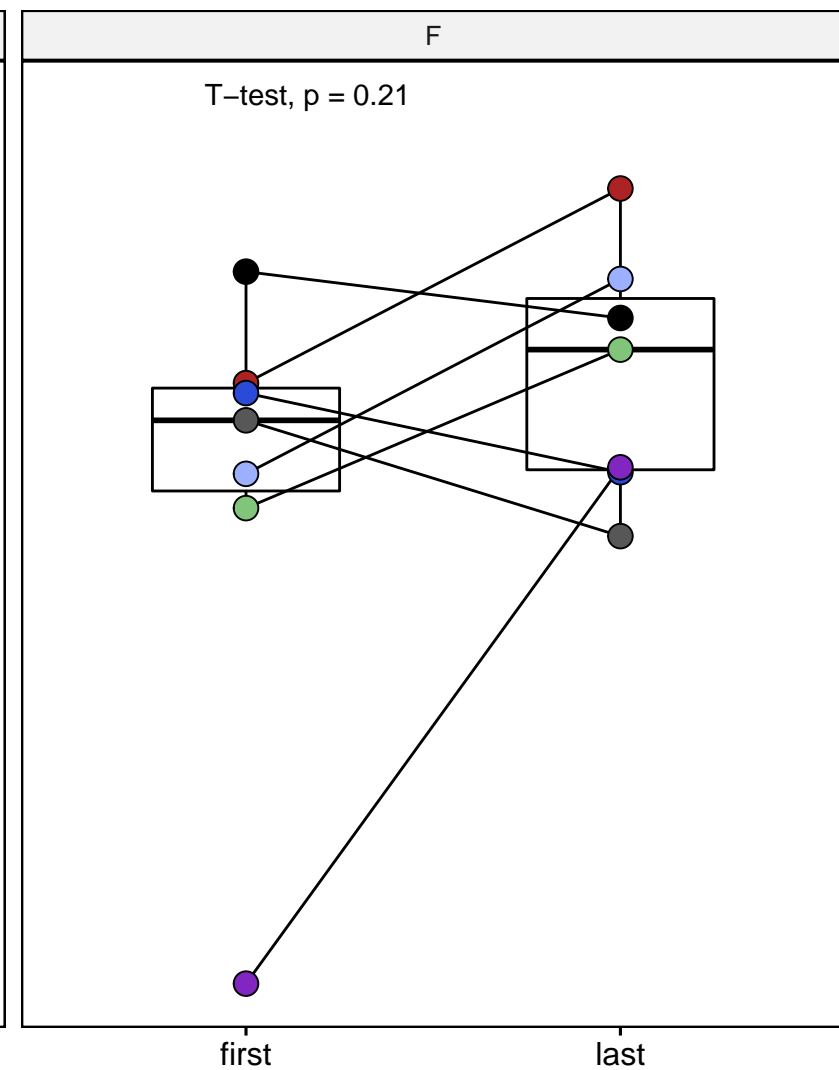

PatID

|                 |                |                |                |               |
|-----------------|----------------|----------------|----------------|---------------|
| ● 11_F68_8days  | ● 21_F53_9days | ● 28_F53_6days | ● 40_F69_4days | ● 6_M79_8days |
| ● 12_F73_7days  | ● 25_M87_3days | ● 30_M49_5days | ● 41_M70_6days |               |
| ● 18_F52_11days | ● 27_M71_4days | ● 32_F69_3days | ● 44_M57_5days |               |

all patients (M+F)

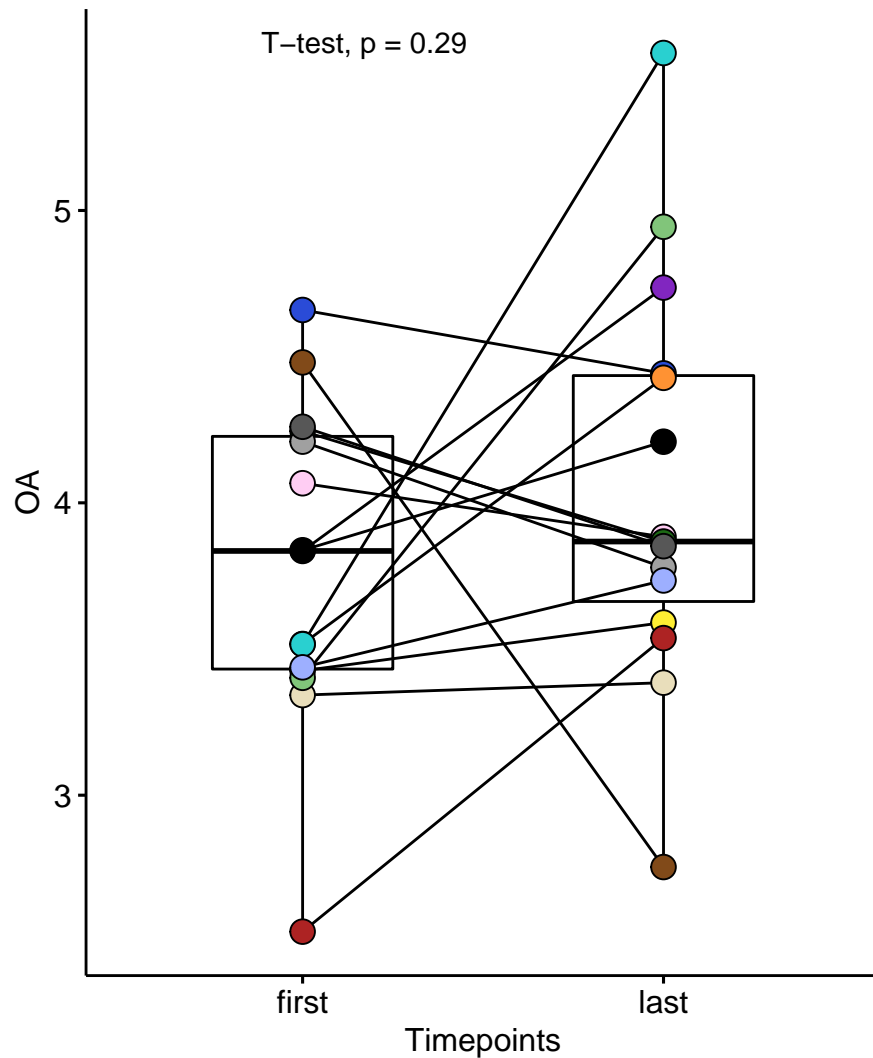

OA

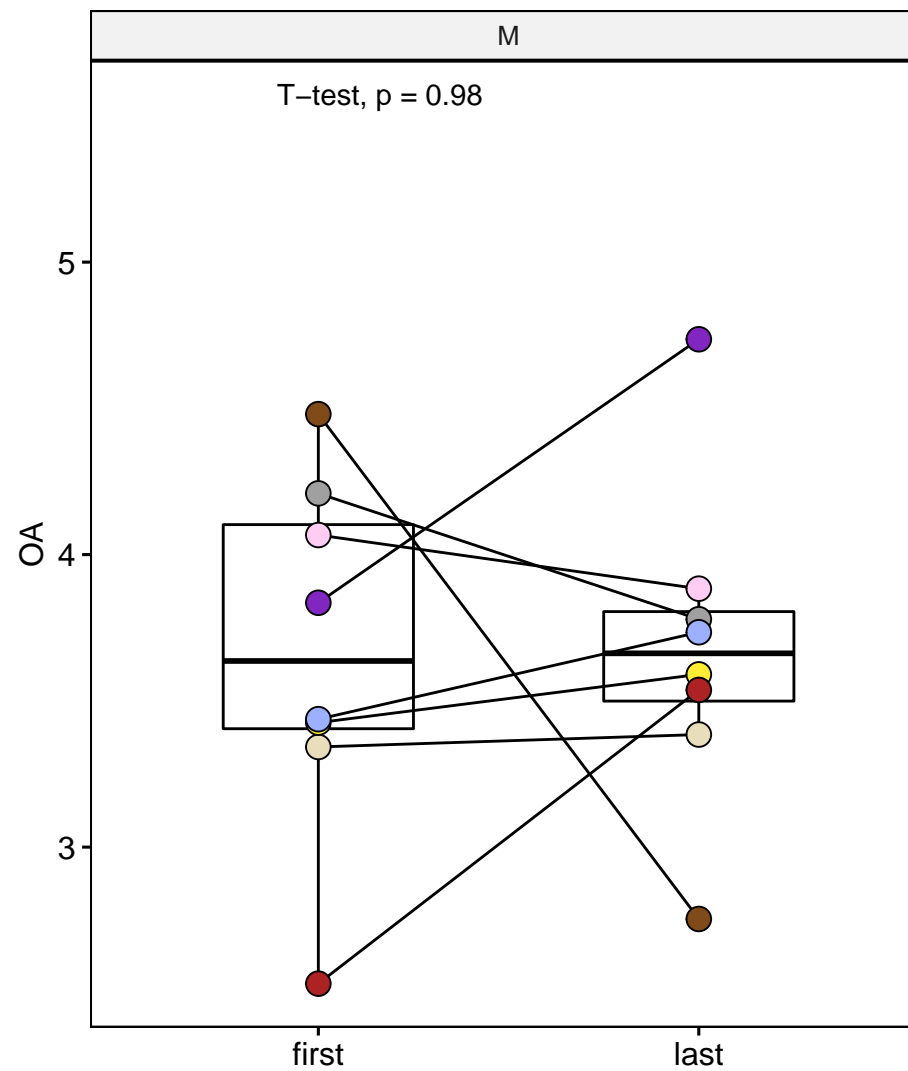

F

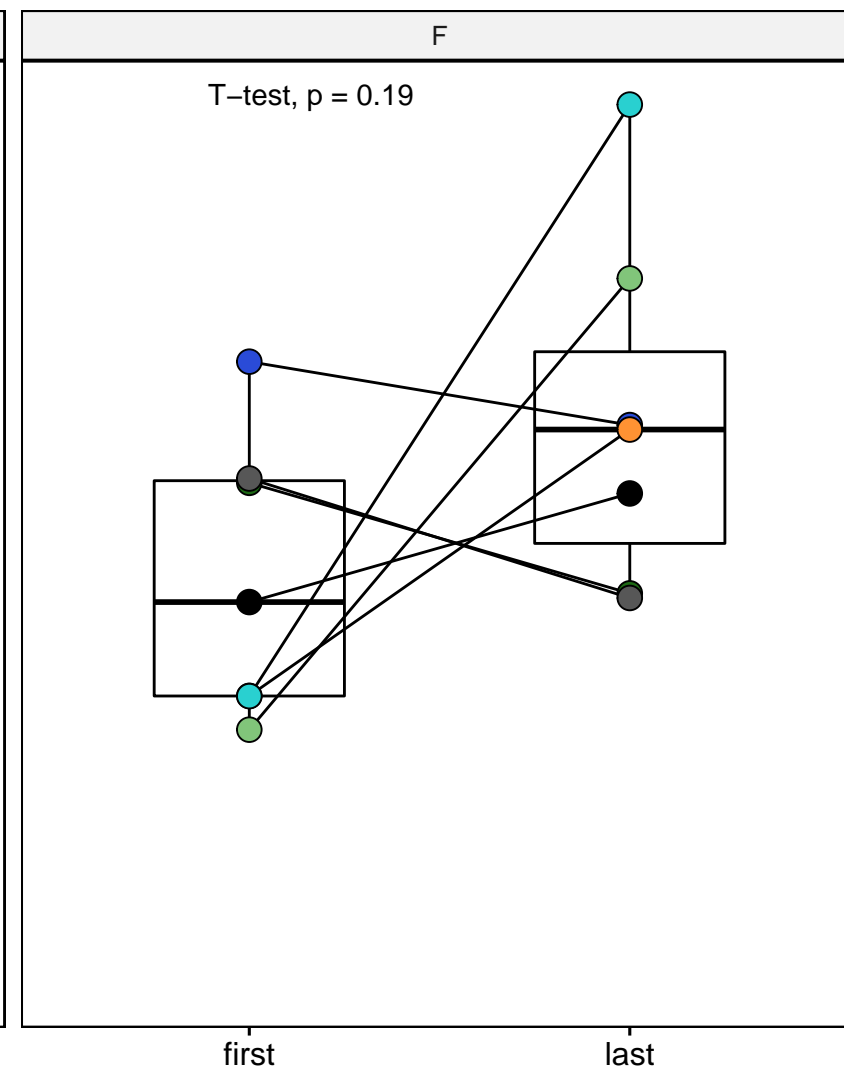

PatID

|                |                 |                |                |                |
|----------------|-----------------|----------------|----------------|----------------|
| ● 11_F68_8days | ● 18_F52_11days | ● 25_M87_3days | ● 30_M49_5days | ● 41_M70_6days |
| ● 12_F73_7days | ● 21_F53_9days  | ● 27_M71_4days | ● 32_F69_3days | ● 44_M57_5days |
| ● 13_M74_4days | ● 22_M65_3days  | ● 28_F53_6days | ● 40_F69_4days | ● 6_M79_8days  |

all patients (M+F)

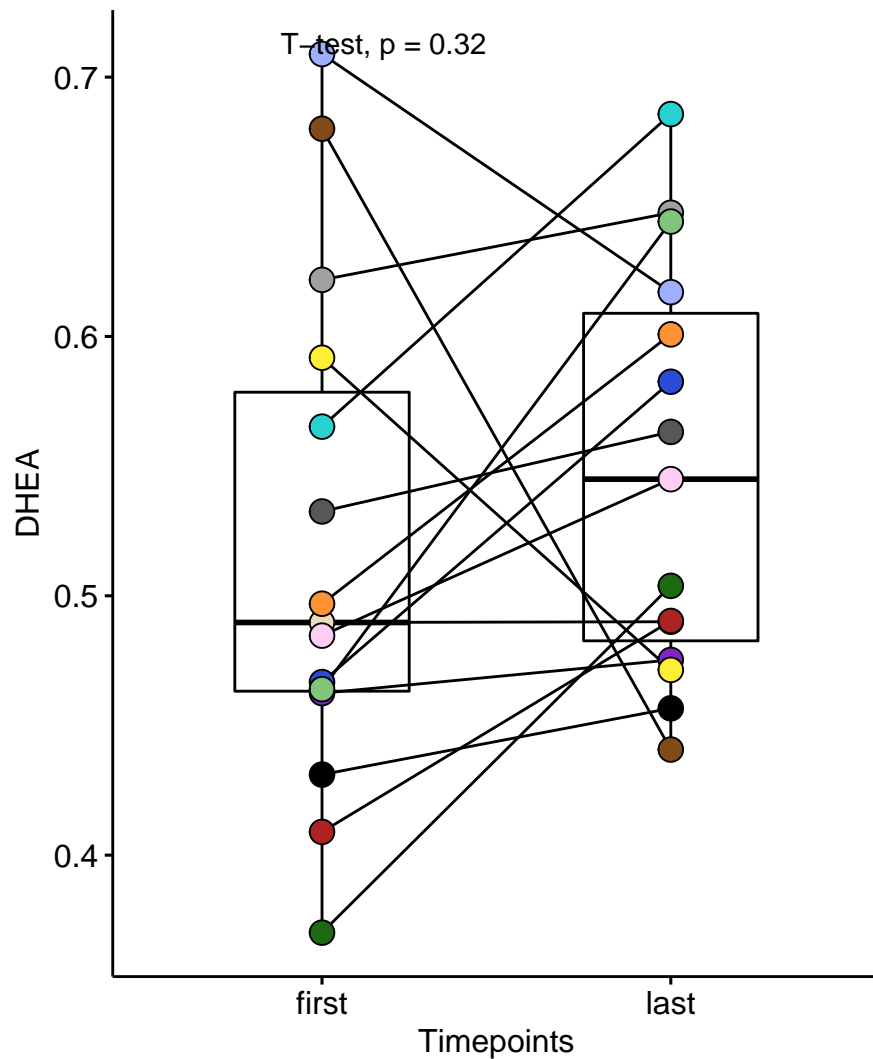

DHEA

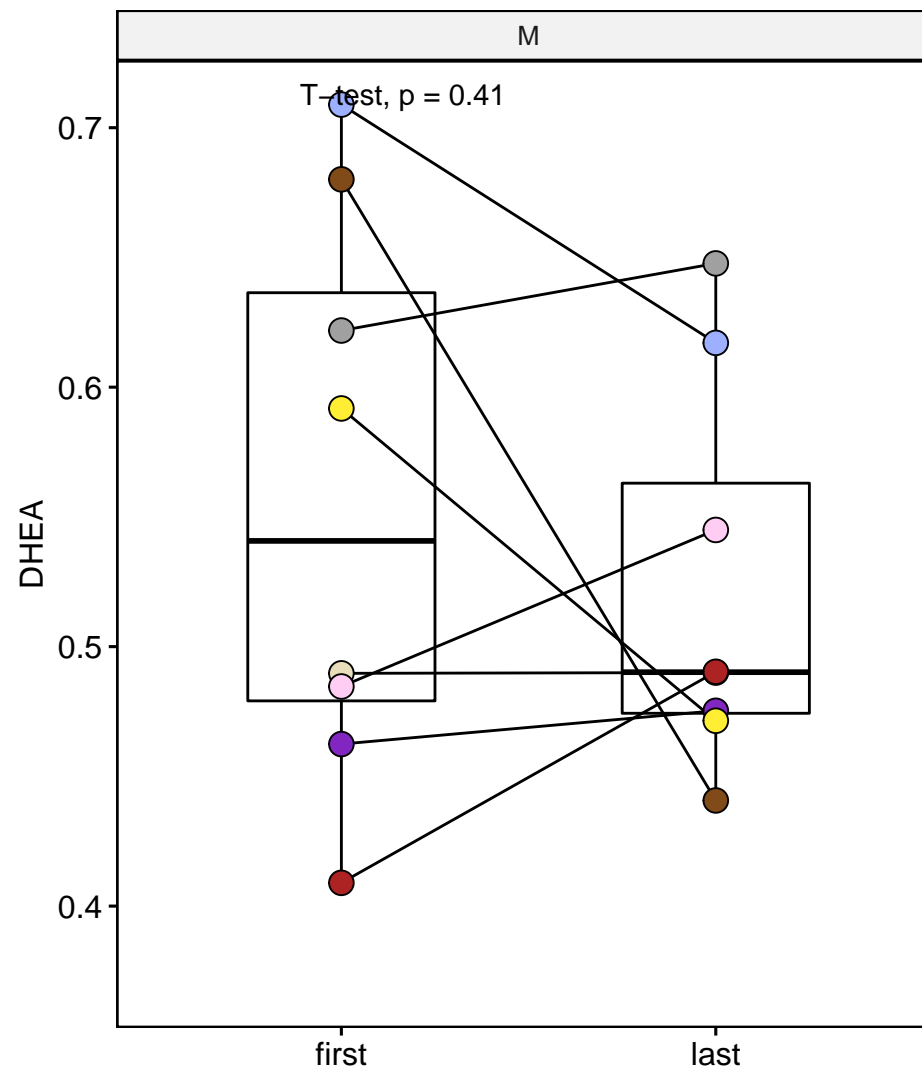

F

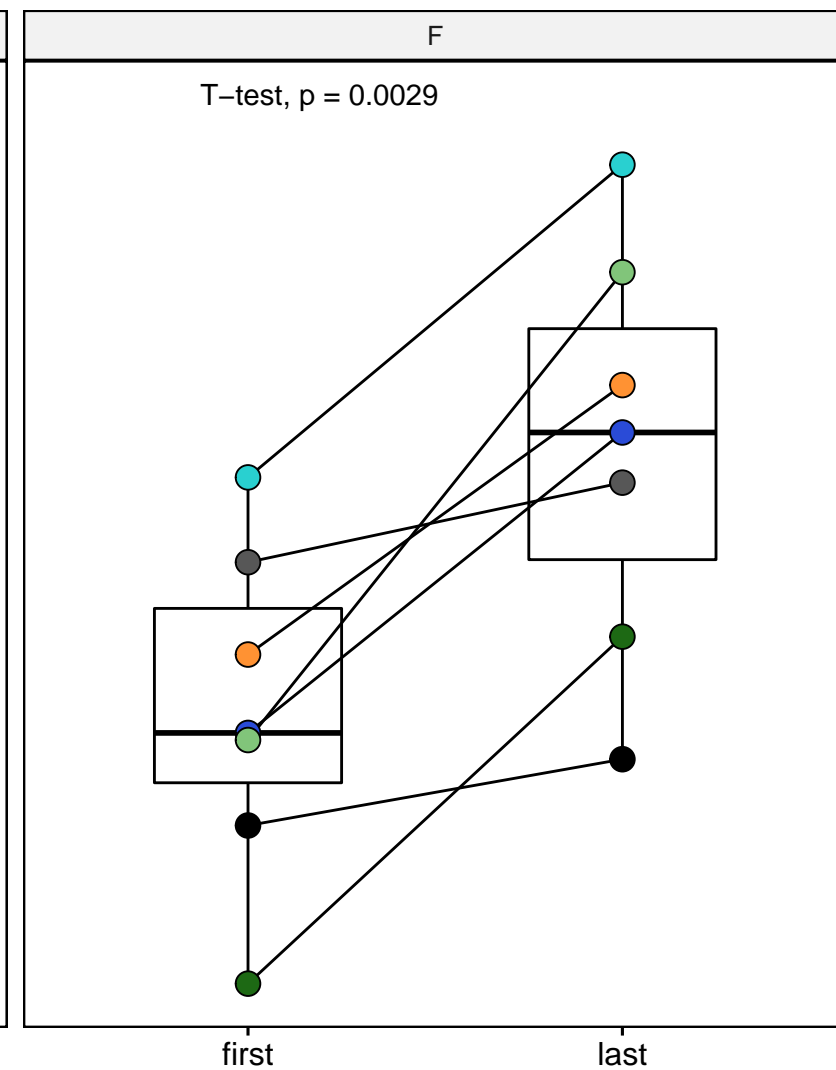

PatID

|                |                 |                |                |                |
|----------------|-----------------|----------------|----------------|----------------|
| ● 11_F68_8days | ● 18_F52_11days | ● 25_M87_3days | ● 30_M49_5days | ● 41_M70_6days |
| ● 12_F73_7days | ● 21_F53_9days  | ● 27_M71_4days | ● 32_F69_3days | ● 44_M57_5days |
| ● 13_M74_4days | ● 22_M65_3days  | ● 28_F53_6days | ● 40_F69_4days | ● 6_M79_8days  |

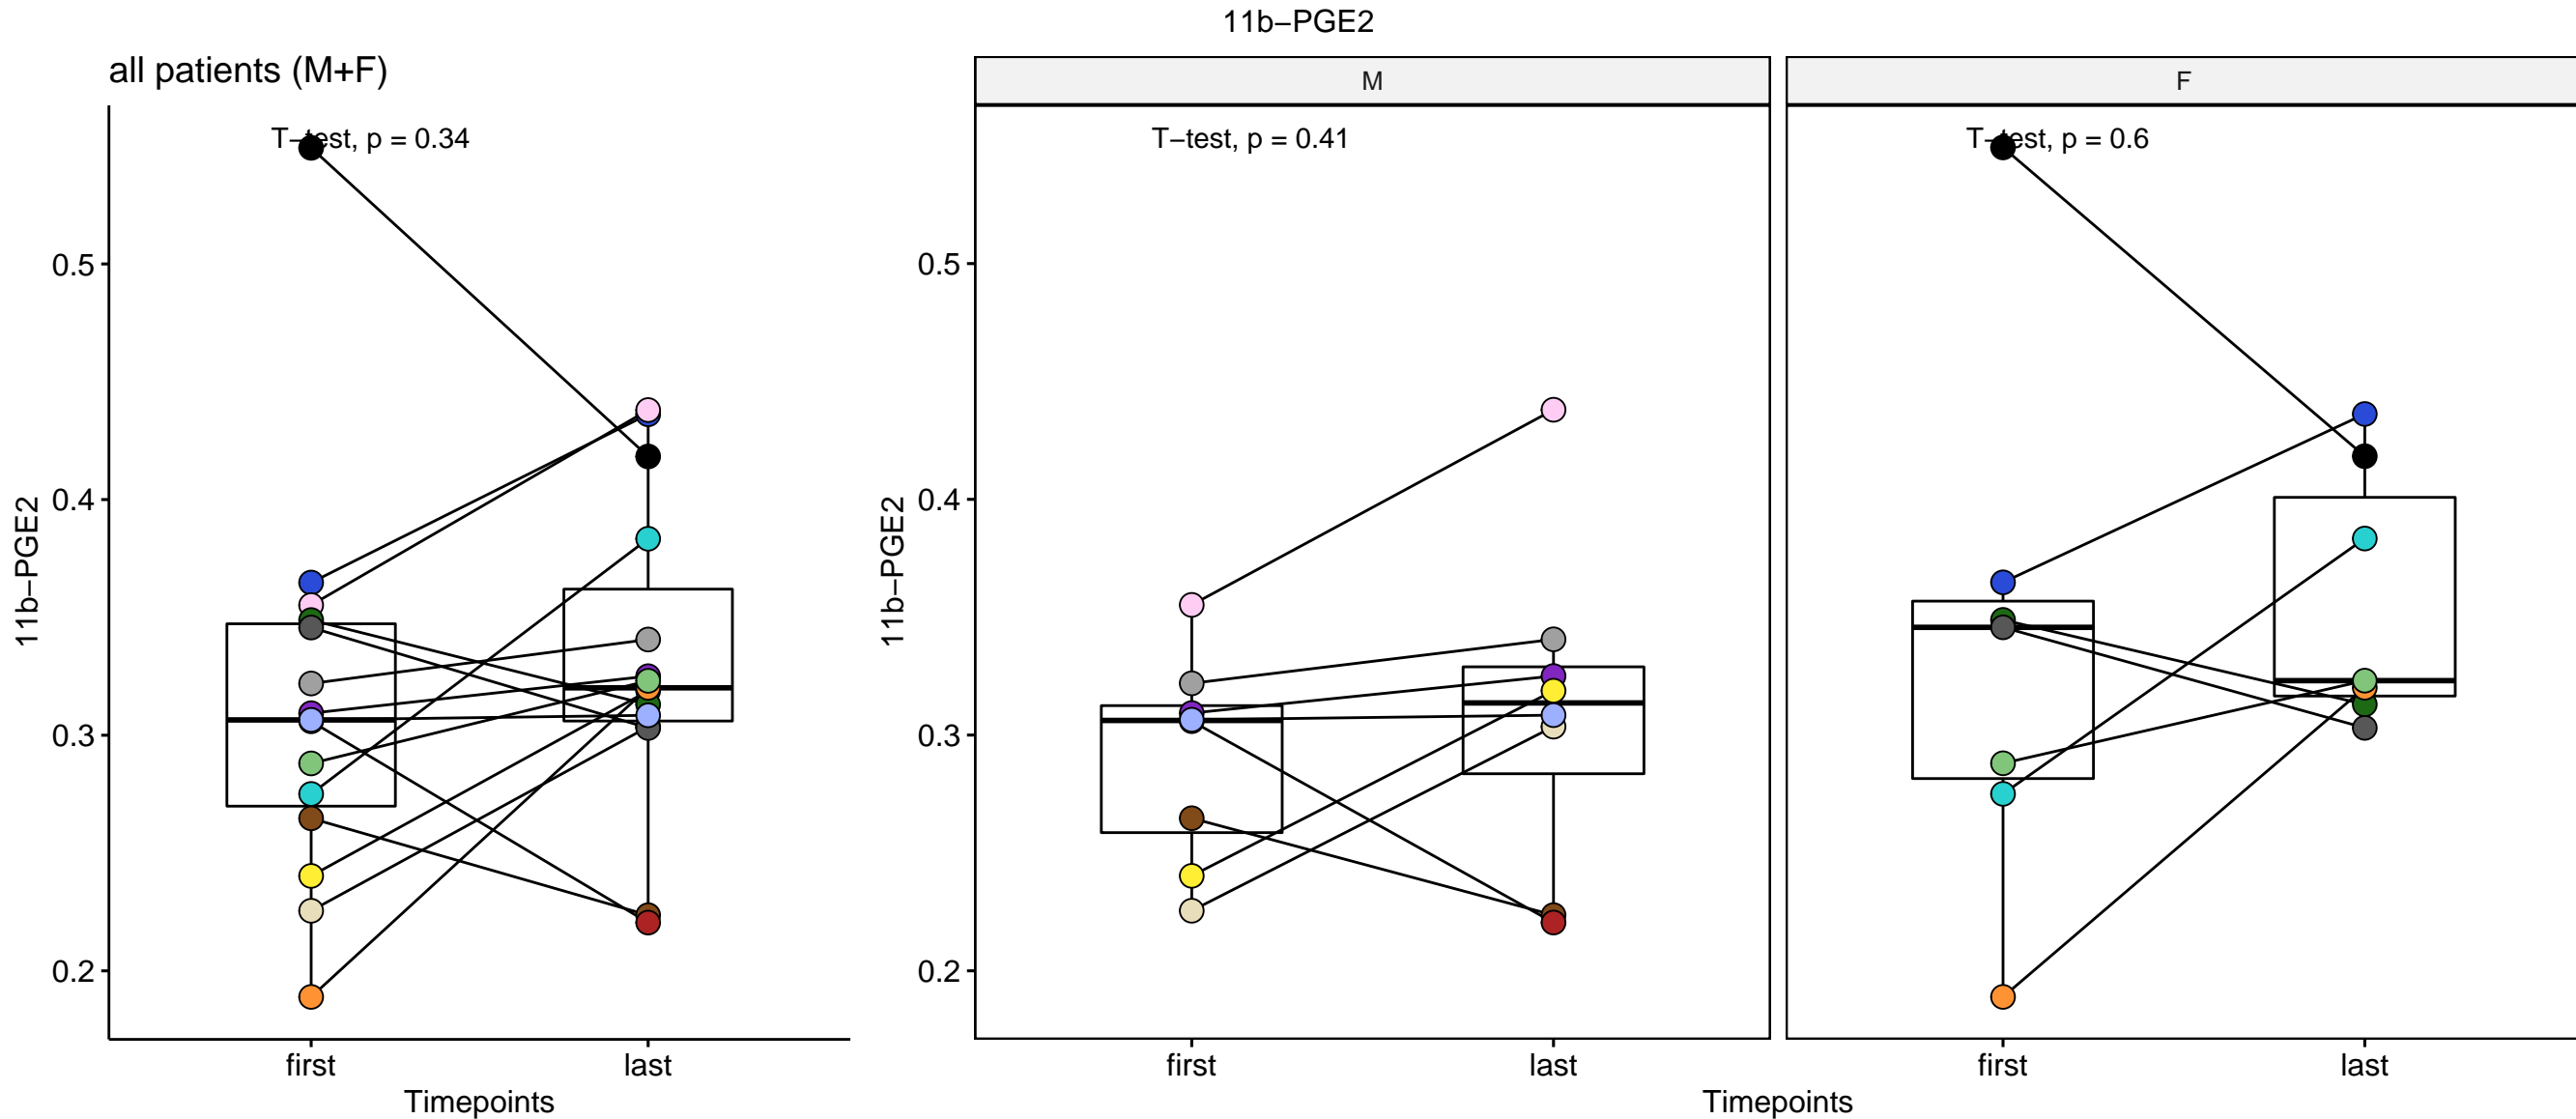

PatID

|              |               |              |              |              |
|--------------|---------------|--------------|--------------|--------------|
| 11_F68_8days | 18_F52_11days | 25_M87_3days | 30_M49_5days | 41_M70_6days |
| 12_F73_7days | 21_F53_9days  | 27_M71_4days | 32_F69_3days | 44_M57_5days |
| 13_M74_4days | 22_M65_3days  | 28_F53_6days | 40_F69_4days | 6_M79_8days  |



all patients (M+F)

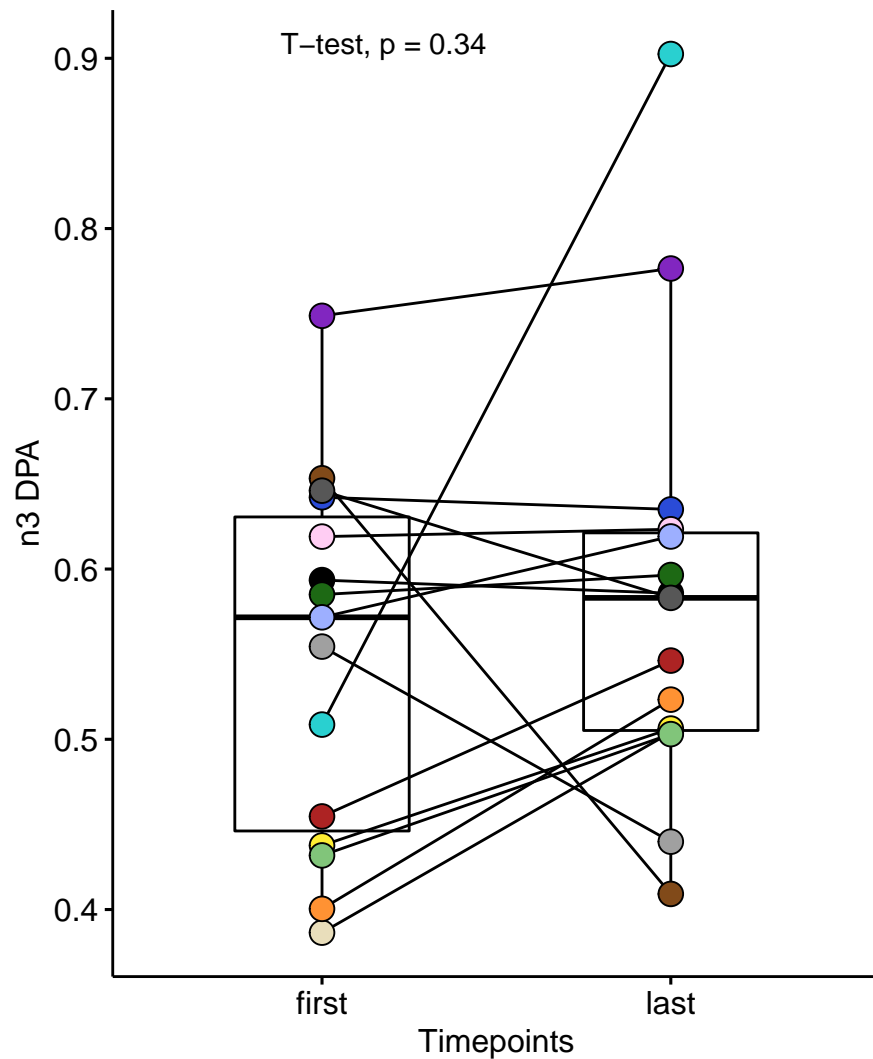

n3 DPA

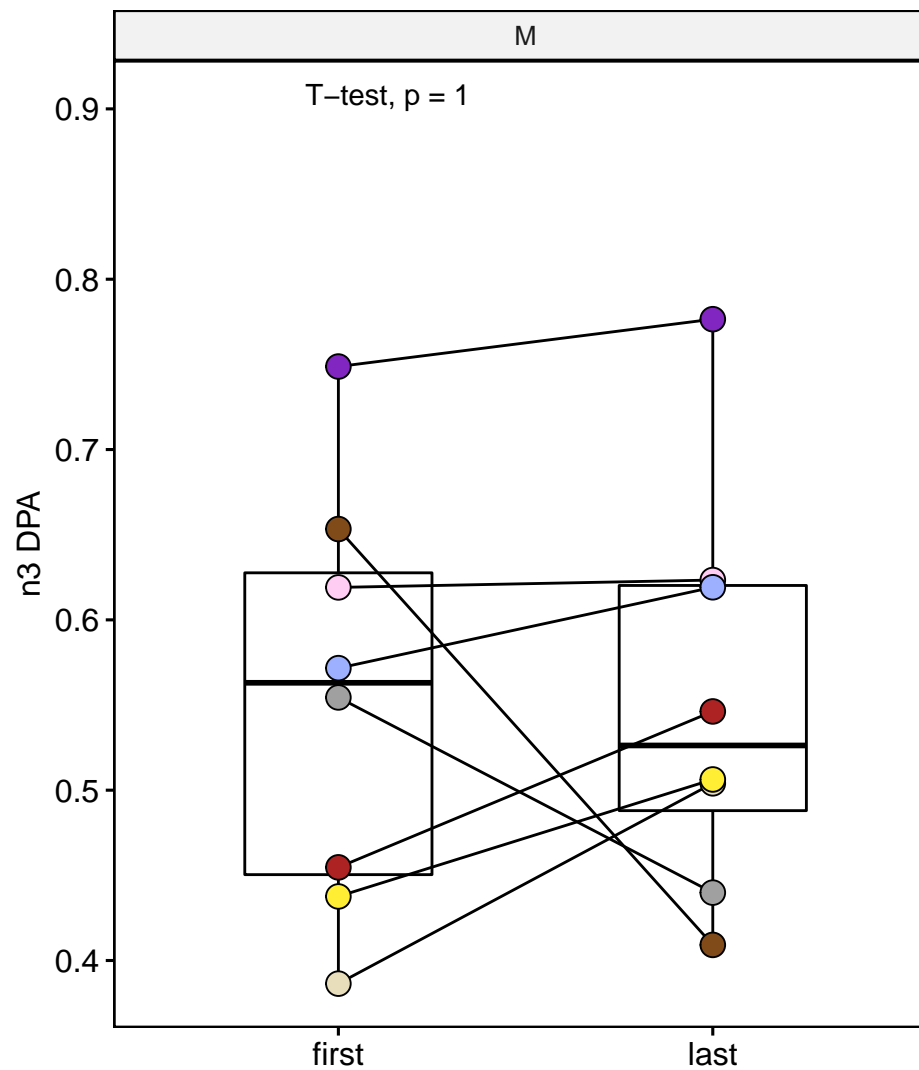

F

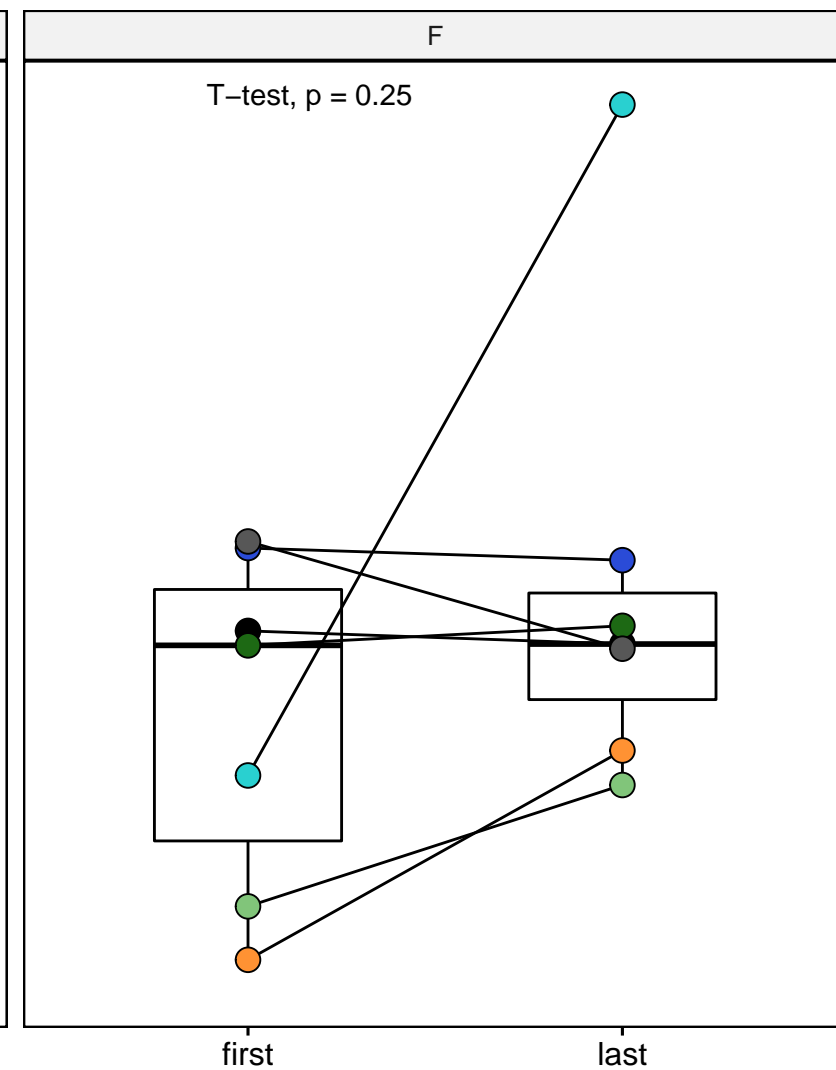

PatID

|                |                 |                |                |                |
|----------------|-----------------|----------------|----------------|----------------|
| ● 11_F68_8days | ● 18_F52_11days | ● 25_M87_3days | ● 30_M49_5days | ● 41_M70_6days |
| ● 12_F73_7days | ● 21_F53_9days  | ● 27_M71_4days | ● 32_F69_3days | ● 44_M57_5days |
| ● 13_M74_4days | ● 22_M65_3days  | ● 28_F53_6days | ● 40_F69_4days | ● 6_M79_8days  |

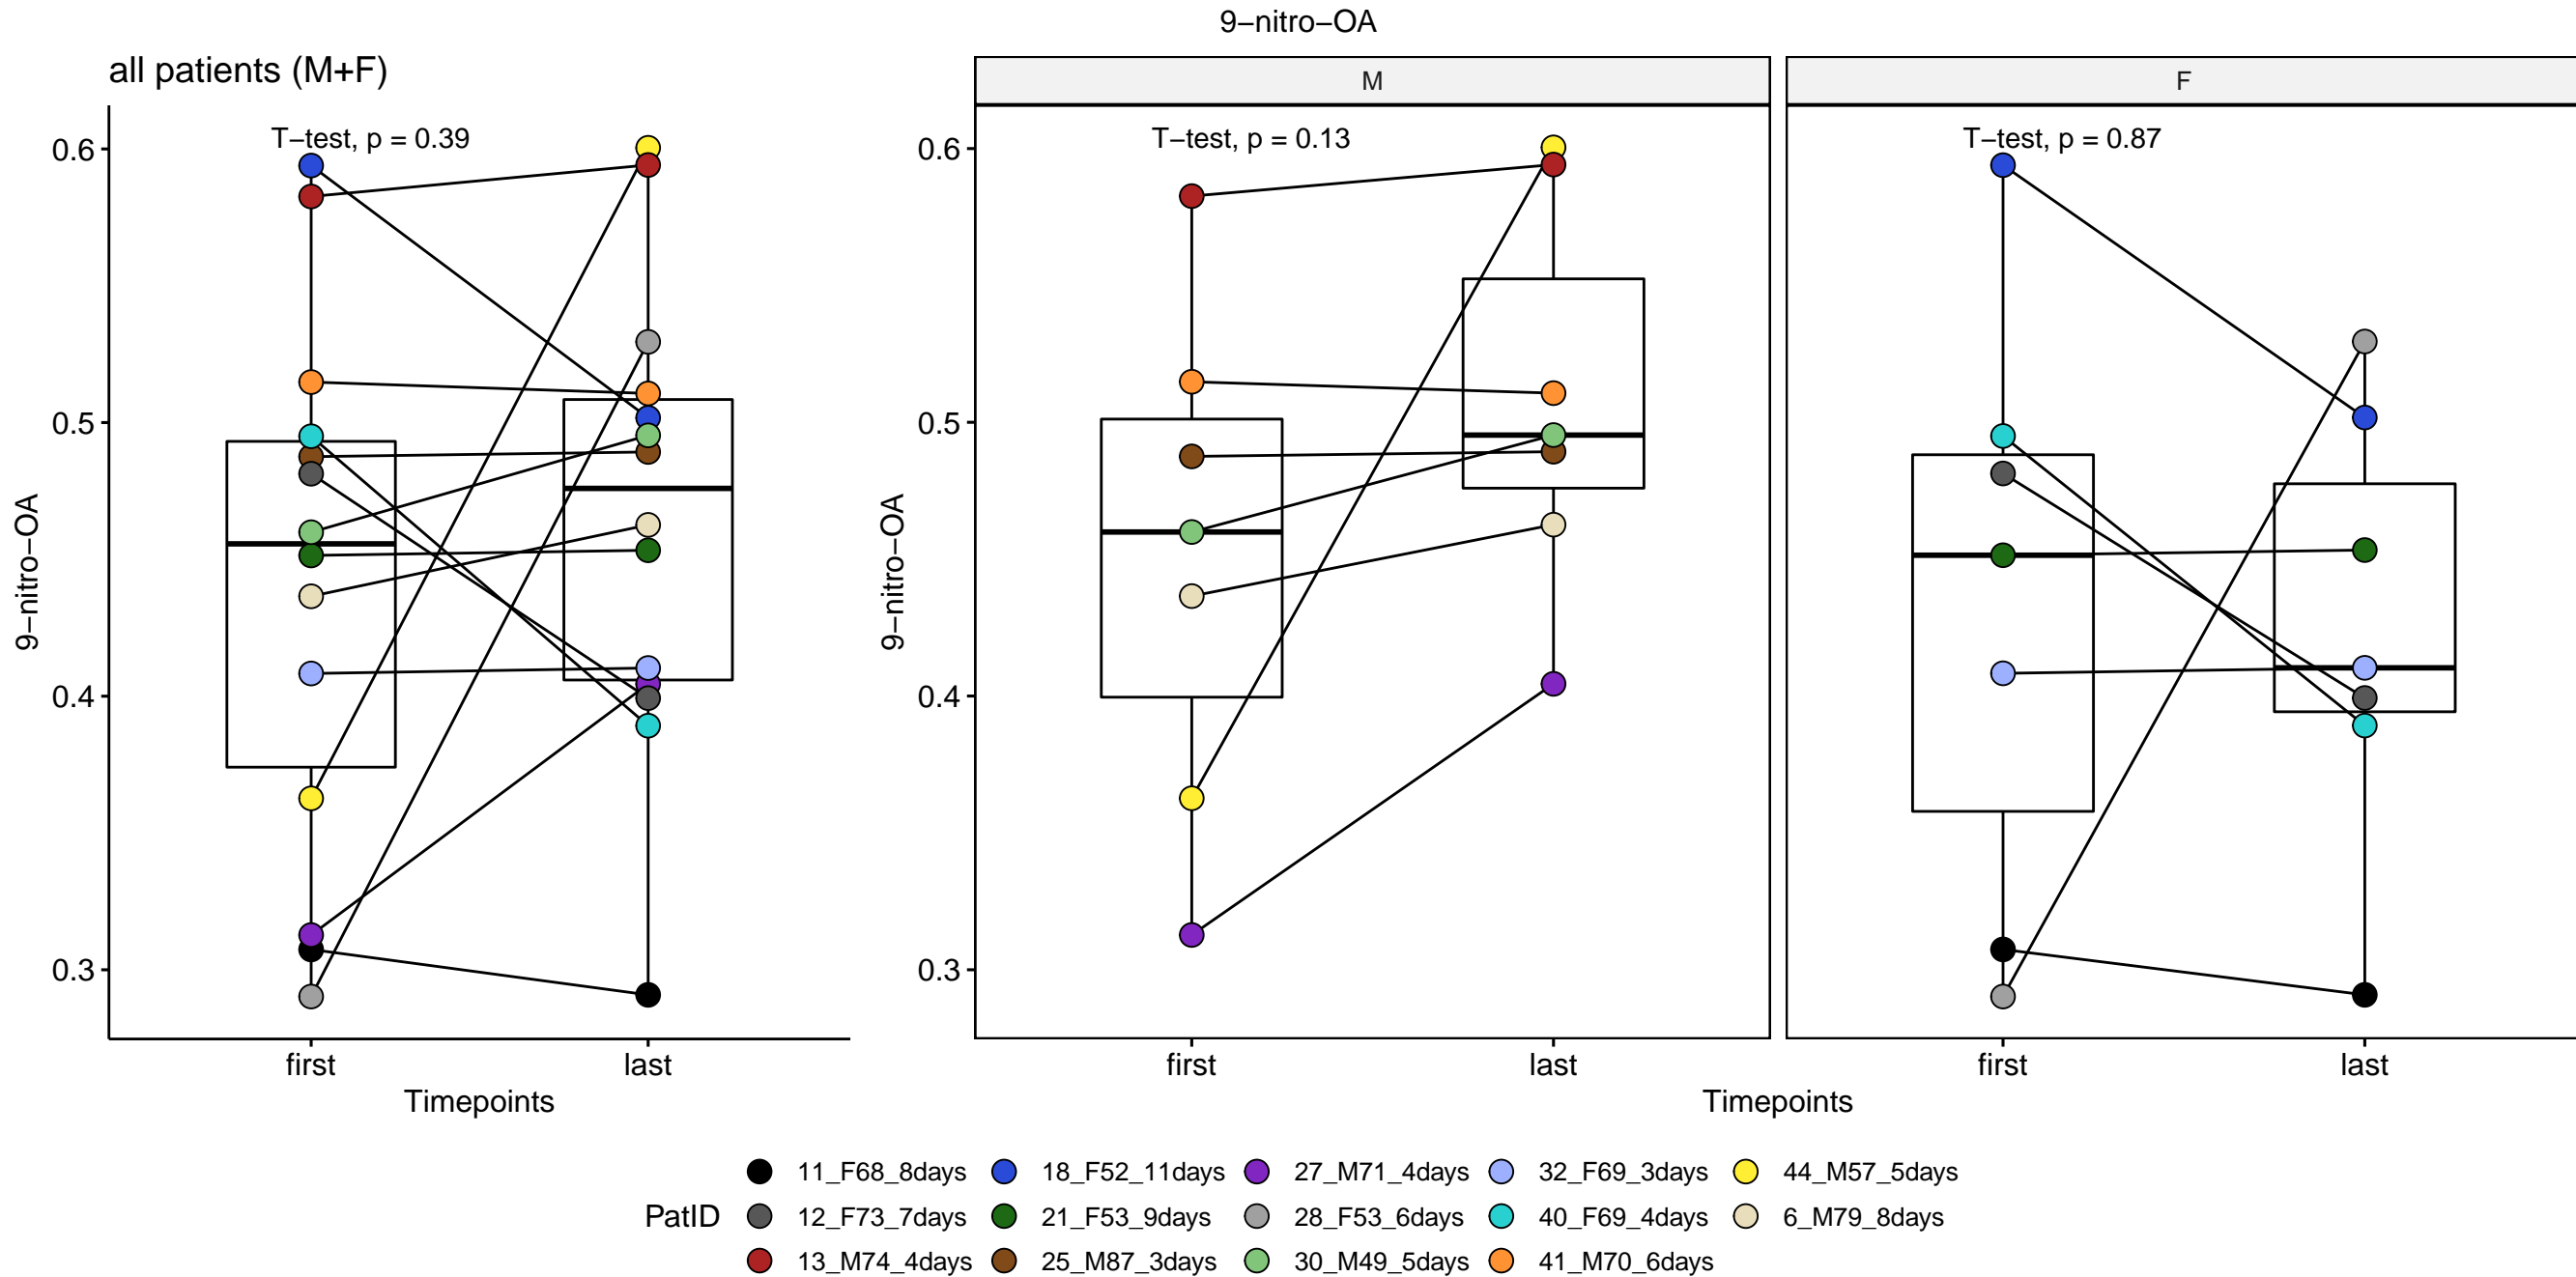

all patients (M+F)

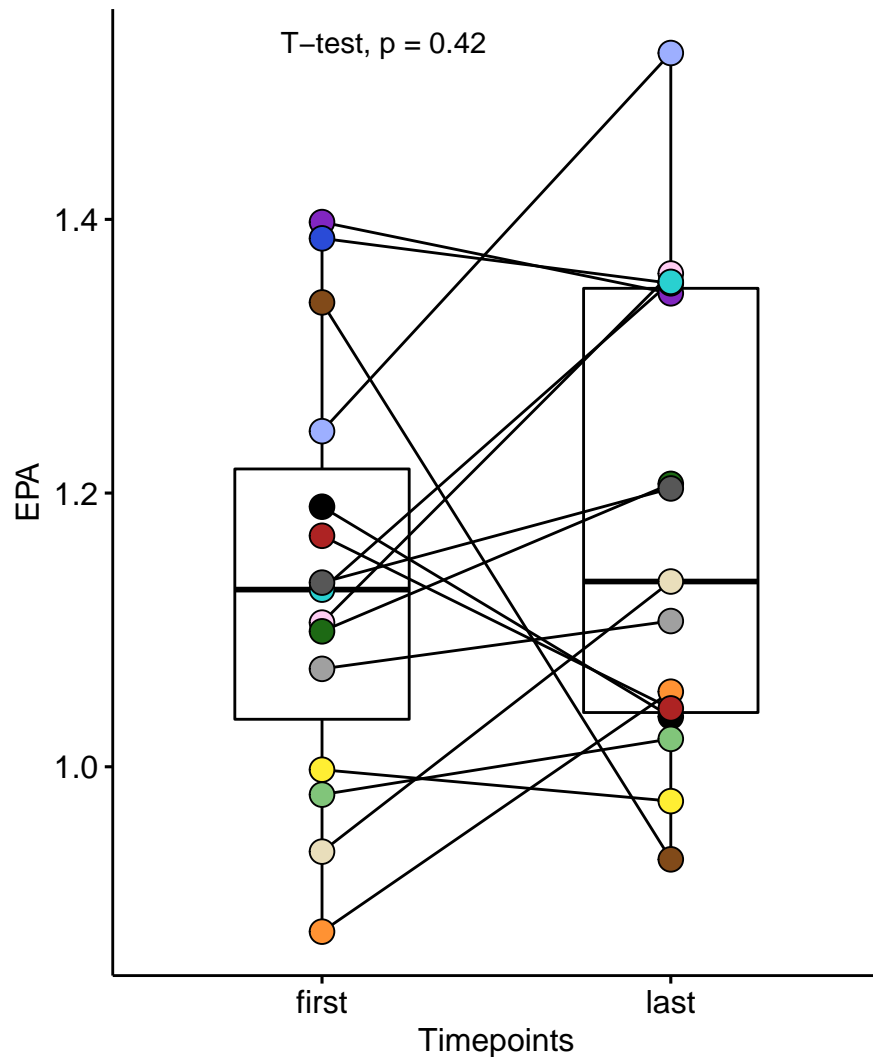

EPA

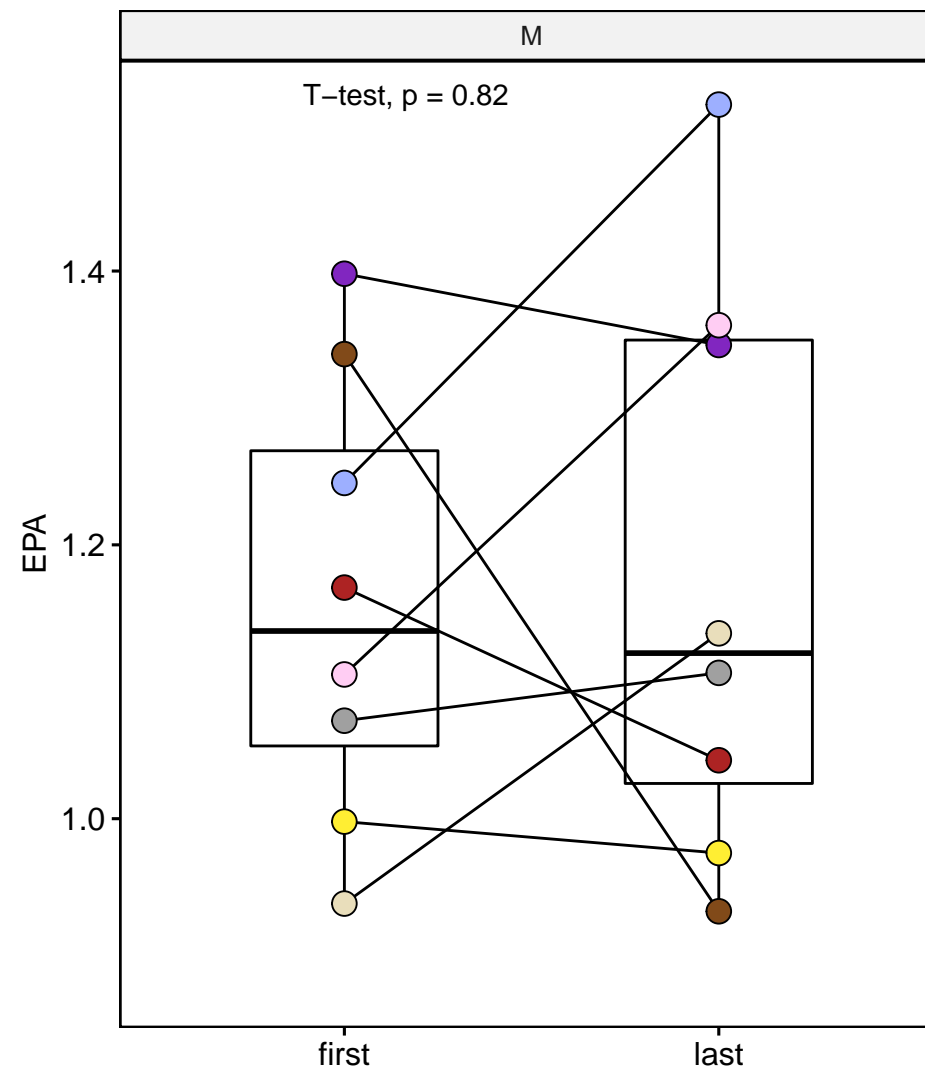

F

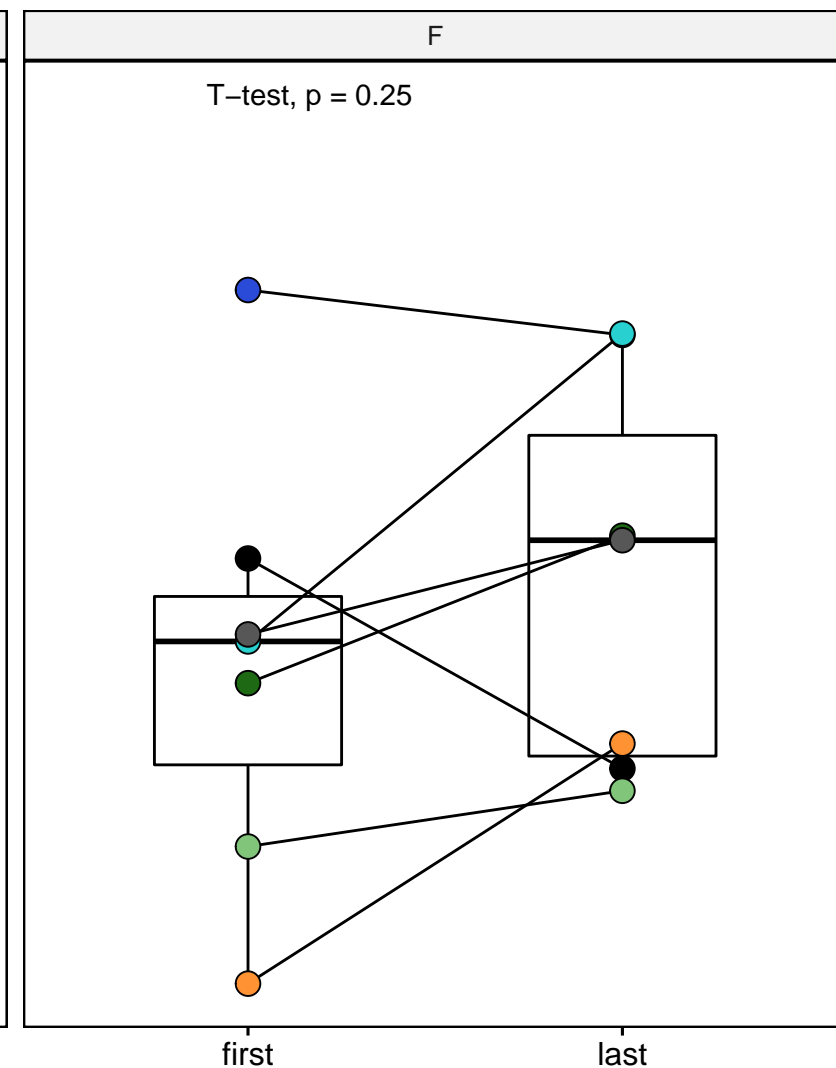

PatID

|                |                 |                |                |                |
|----------------|-----------------|----------------|----------------|----------------|
| ● 11_F68_8days | ● 18_F52_11days | ● 25_M87_3days | ● 30_M49_5days | ● 41_M70_6days |
| ● 12_F73_7days | ● 21_F53_9days  | ● 27_M71_4days | ● 32_F69_3days | ● 44_M57_5days |
| ● 13_M74_4days | ● 22_M65_3days  | ● 28_F53_6days | ● 40_F69_4days | ● 6_M79_8days  |

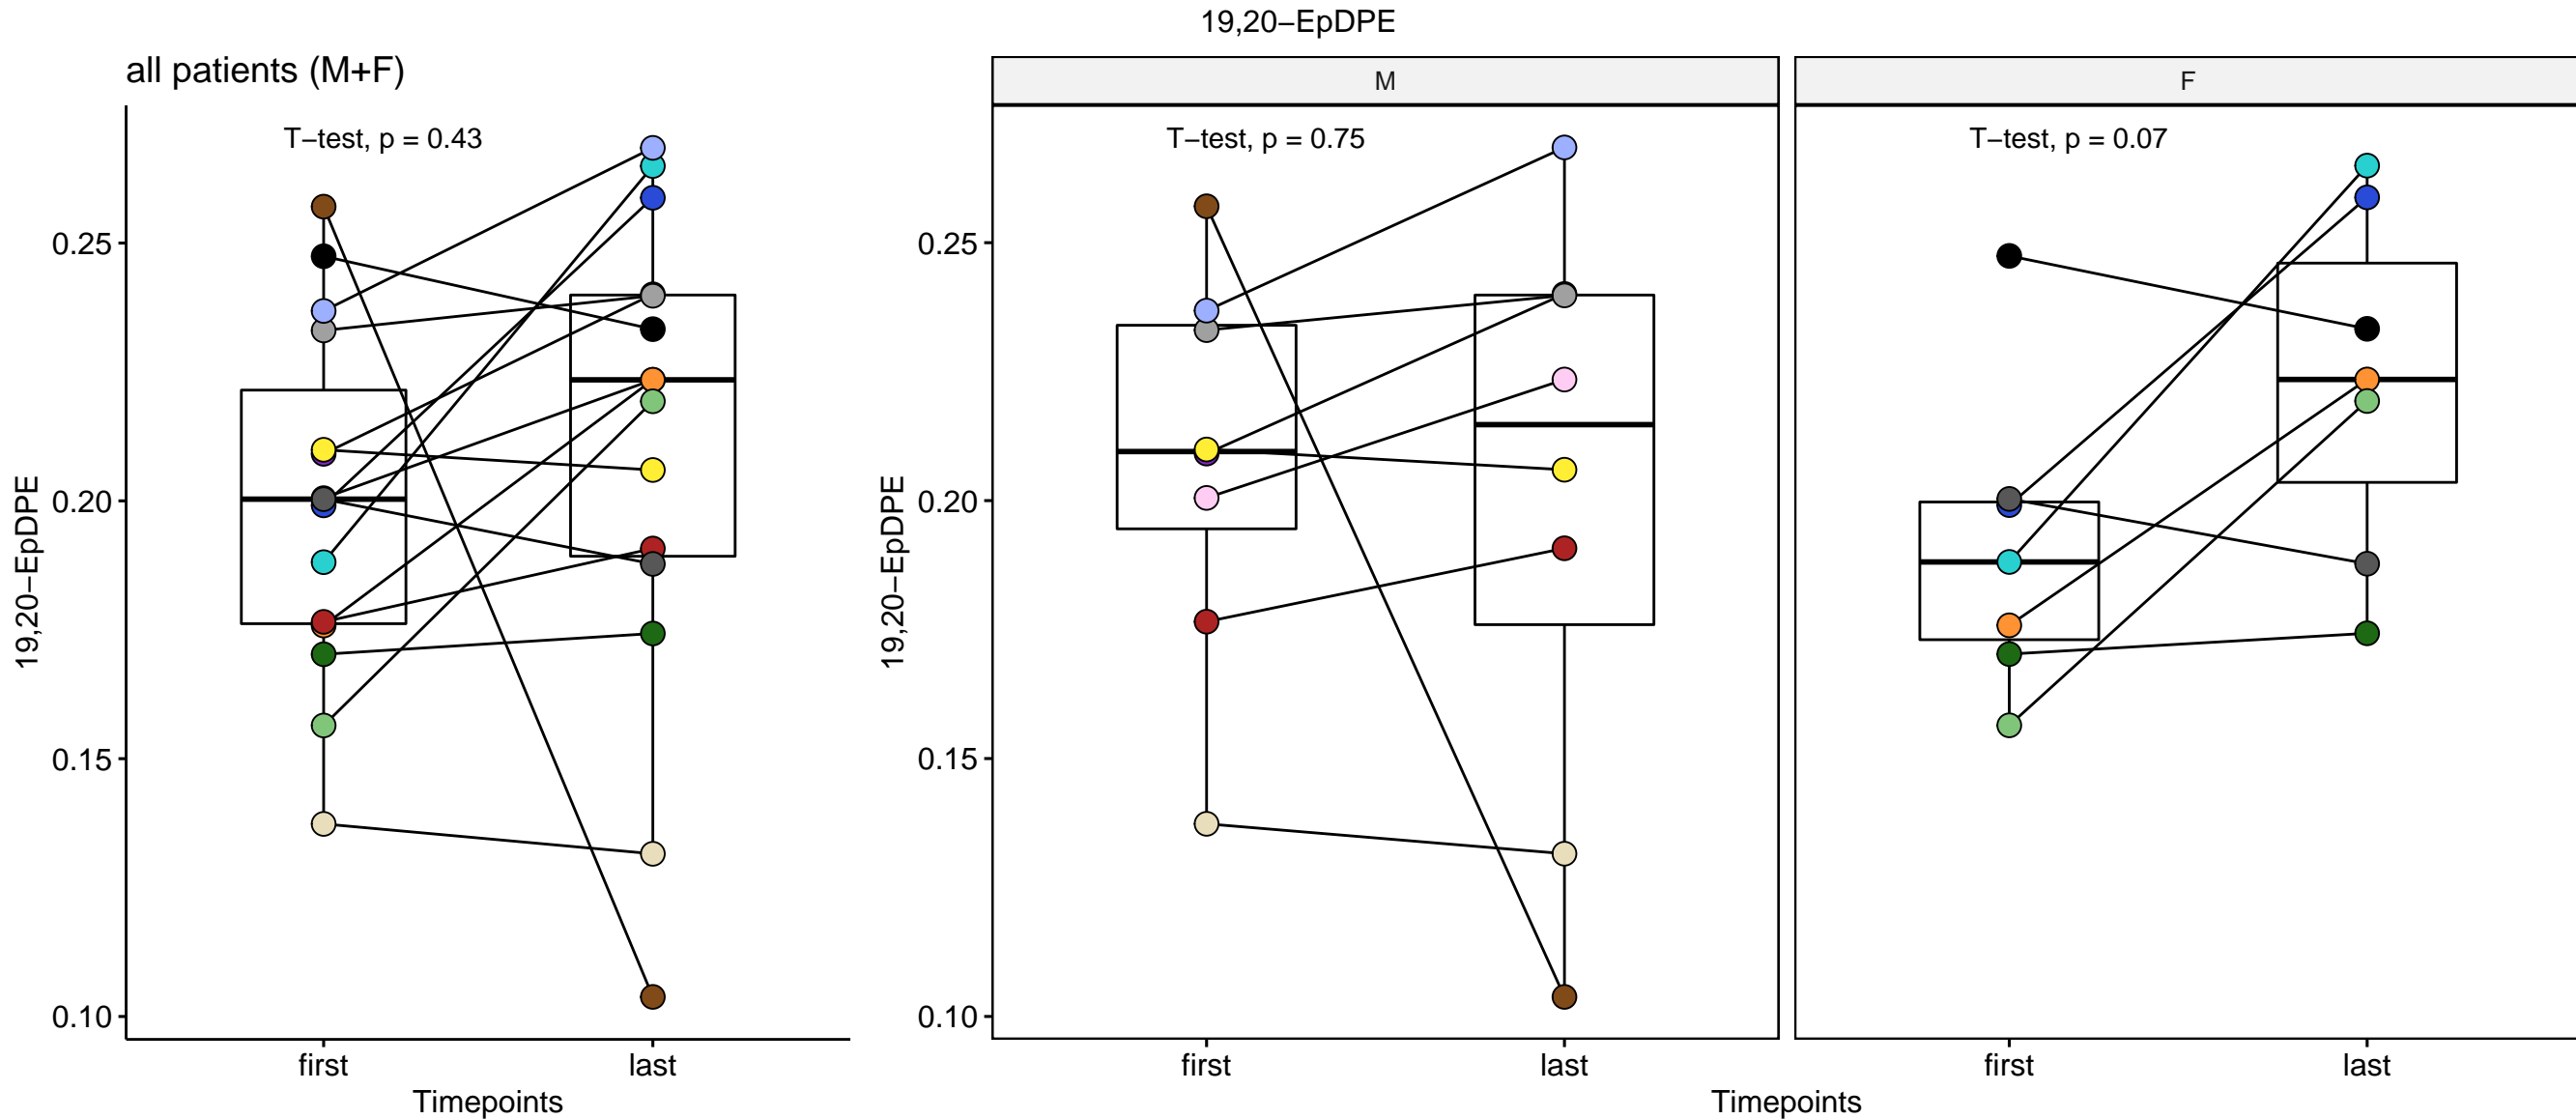

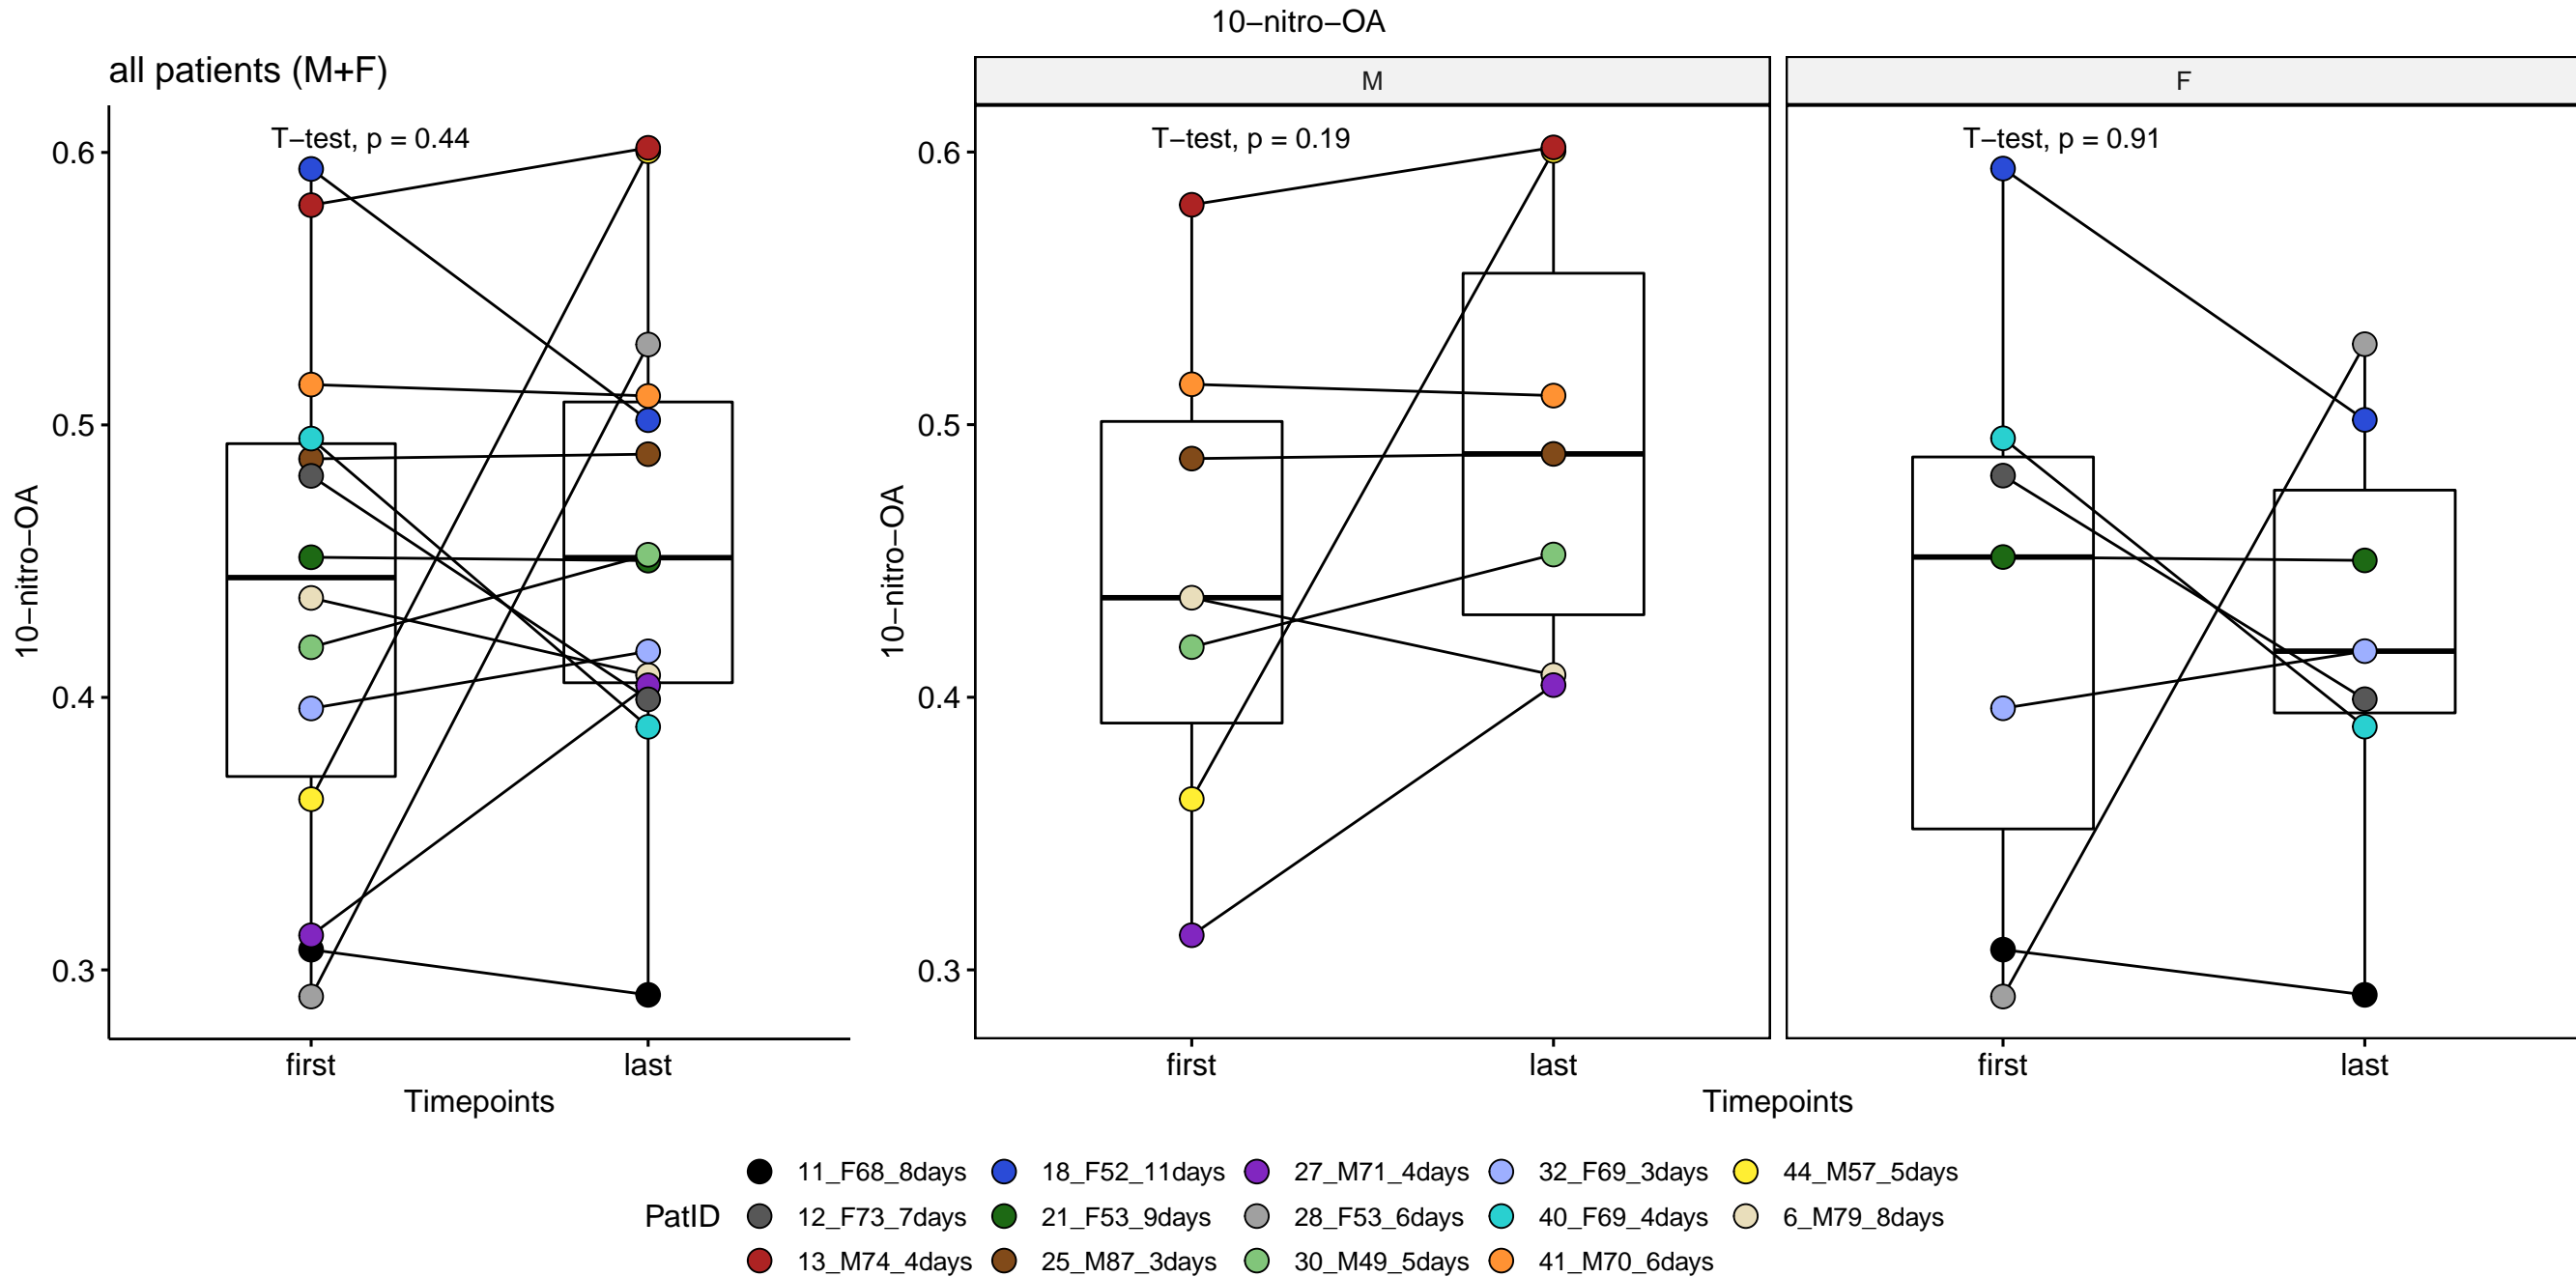

all patients (M+F)

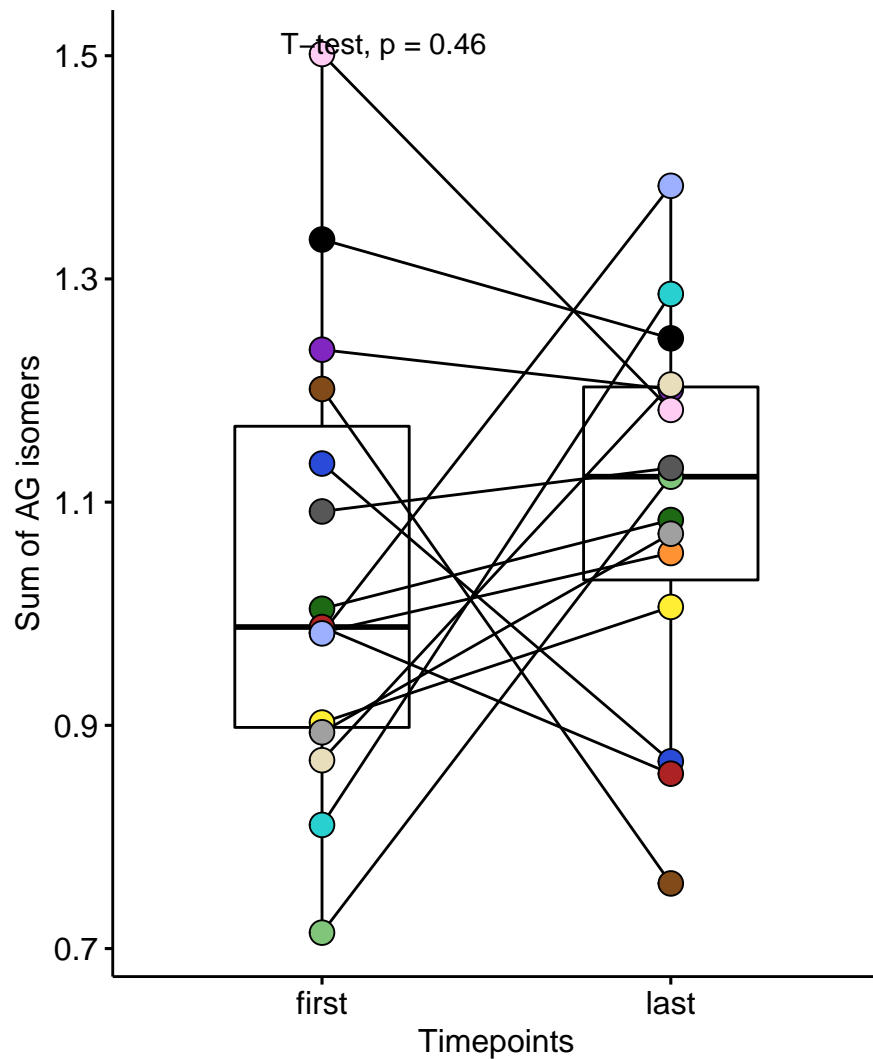

Sum of AG isomers

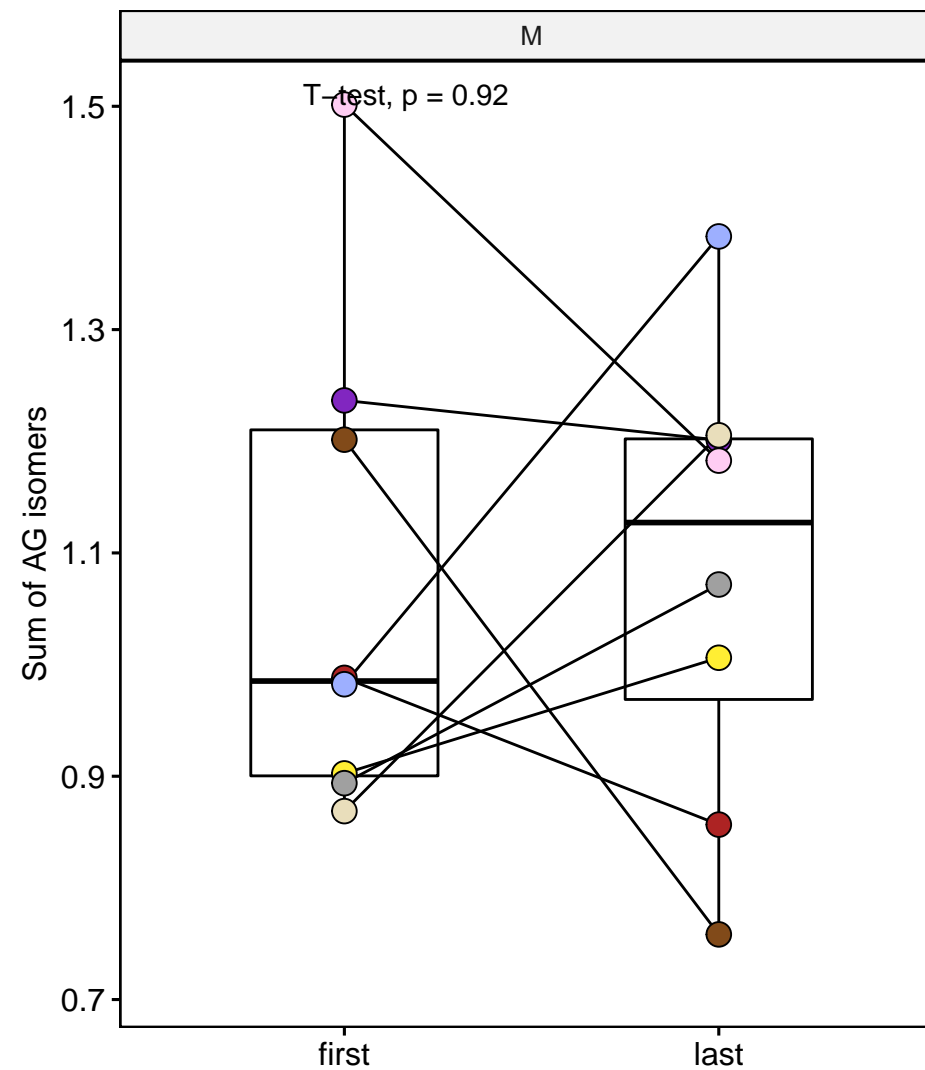

F

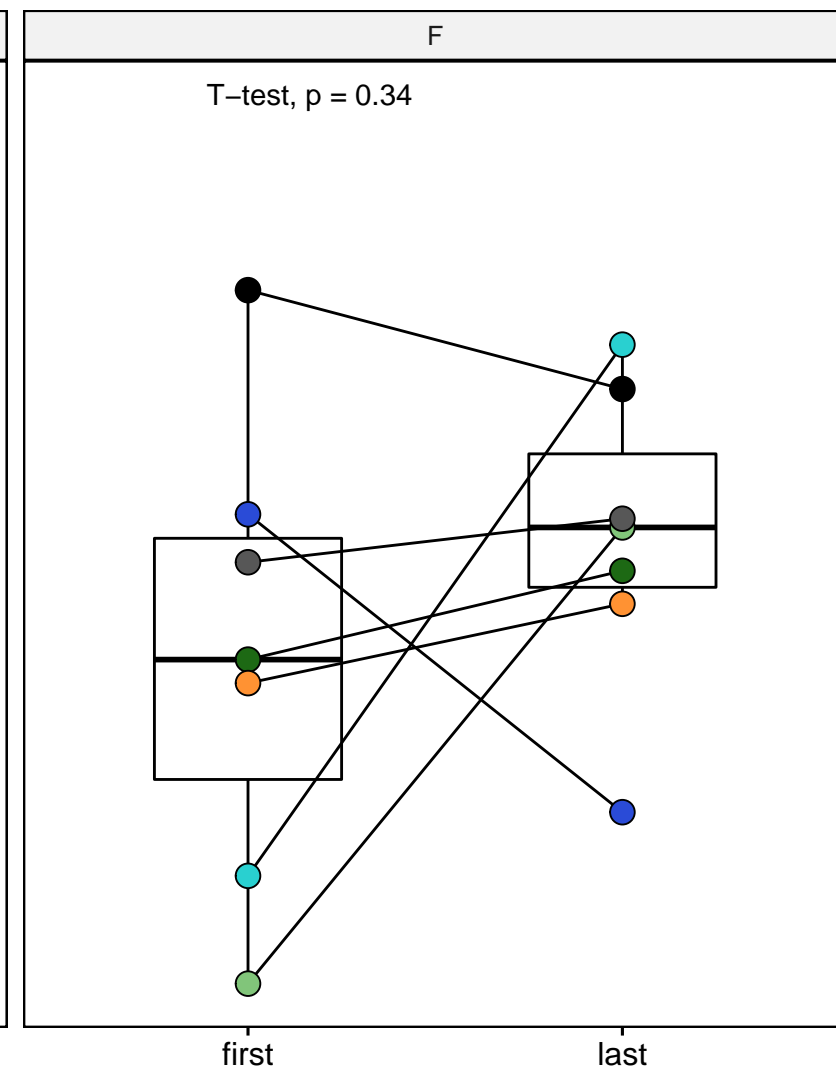

PatID

|                |                 |                |                |                |
|----------------|-----------------|----------------|----------------|----------------|
| ● 11_F68_8days | ● 18_F52_11days | ● 25_M87_3days | ● 30_M49_5days | ● 41_M70_6days |
| ● 12_F73_7days | ● 21_F53_9days  | ● 27_M71_4days | ● 32_F69_3days | ● 44_M57_5days |
| ● 13_M74_4days | ● 22_M65_3days  | ● 28_F53_6days | ● 40_F69_4days | ● 6_M79_8days  |

# 5-HEPE

all patients (M+F)

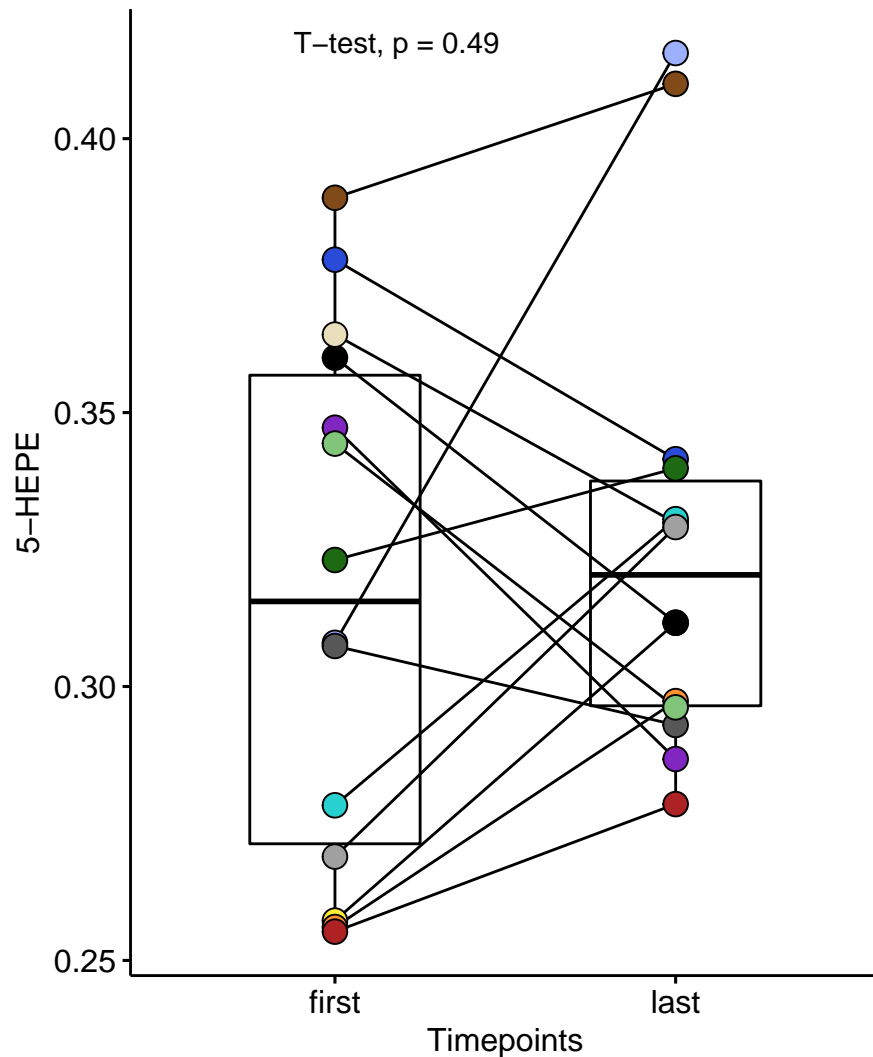

M

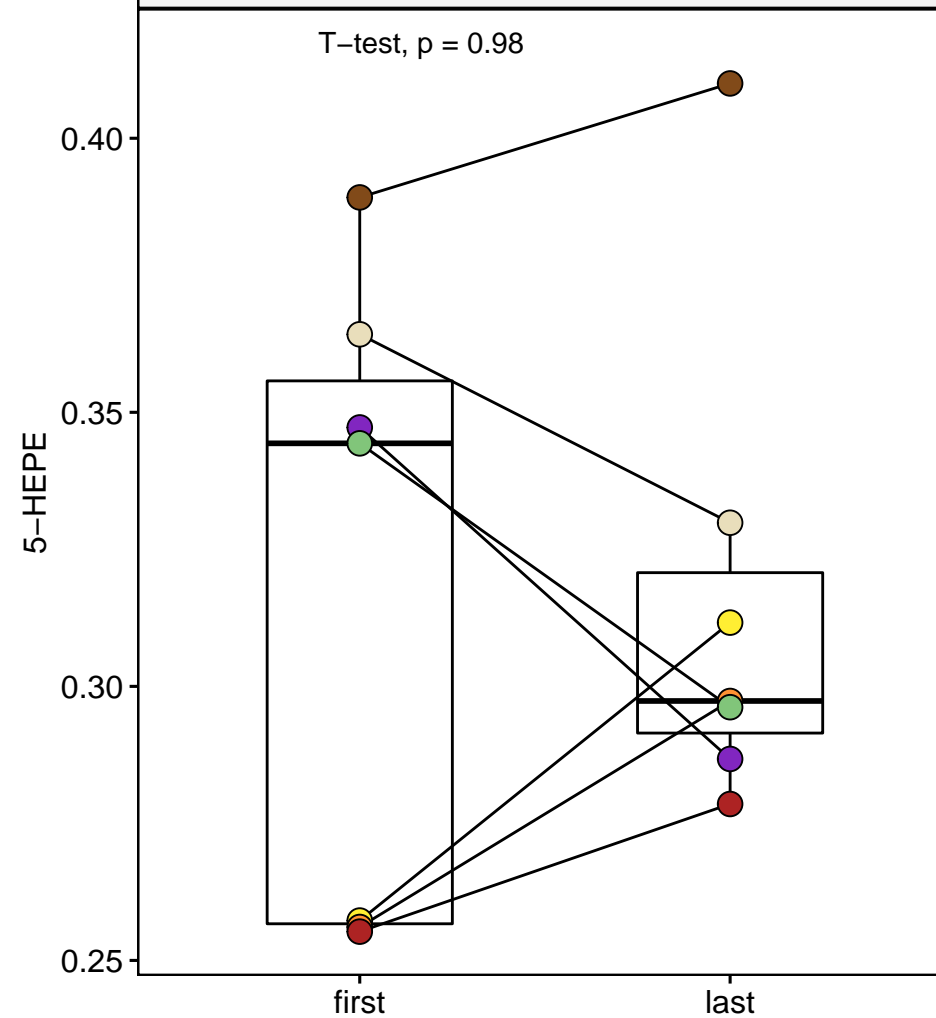

F

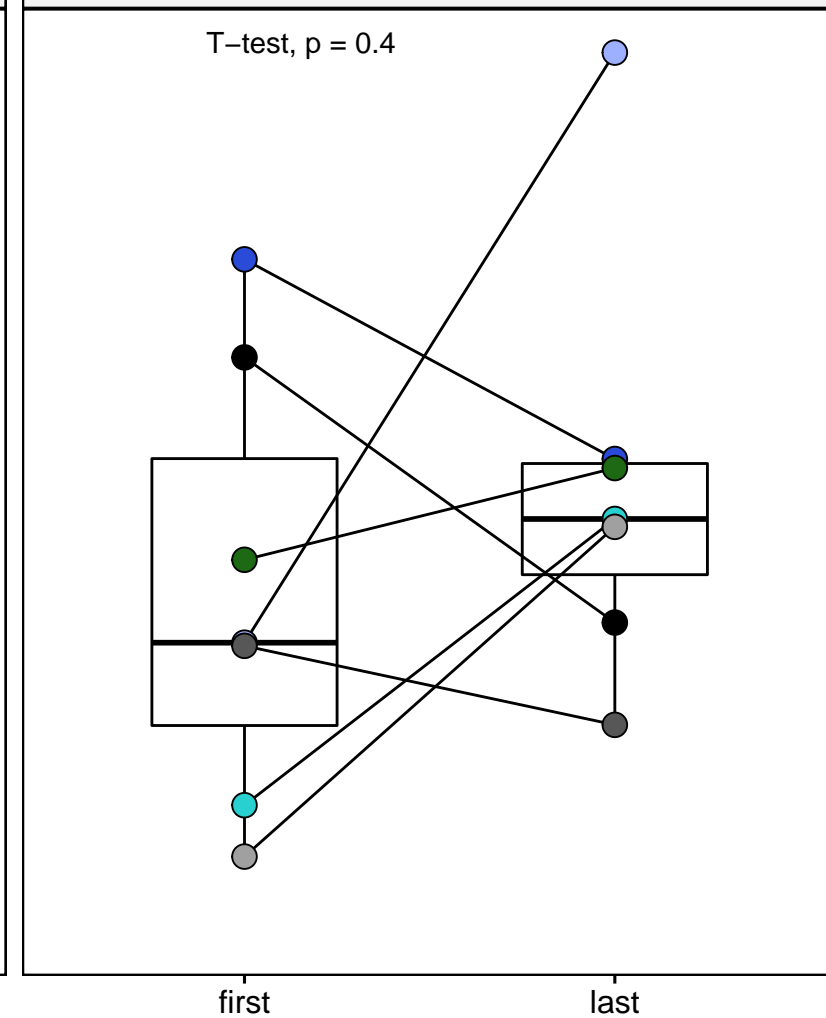

PatID

|                |                 |                |                |                |
|----------------|-----------------|----------------|----------------|----------------|
| ● 11_F68_8days | ● 18_F52_11days | ● 27_M71_4days | ● 32_F69_3days | ● 44_M57_5days |
| ● 12_F73_7days | ● 21_F53_9days  | ● 28_F53_6days | ● 40_F69_4days | ● 6_M79_8days  |
| ● 13_M74_4days | ● 25_M87_3days  | ● 30_M49_5days | ● 41_M70_6days |                |

# AdA

all patients (M+F)

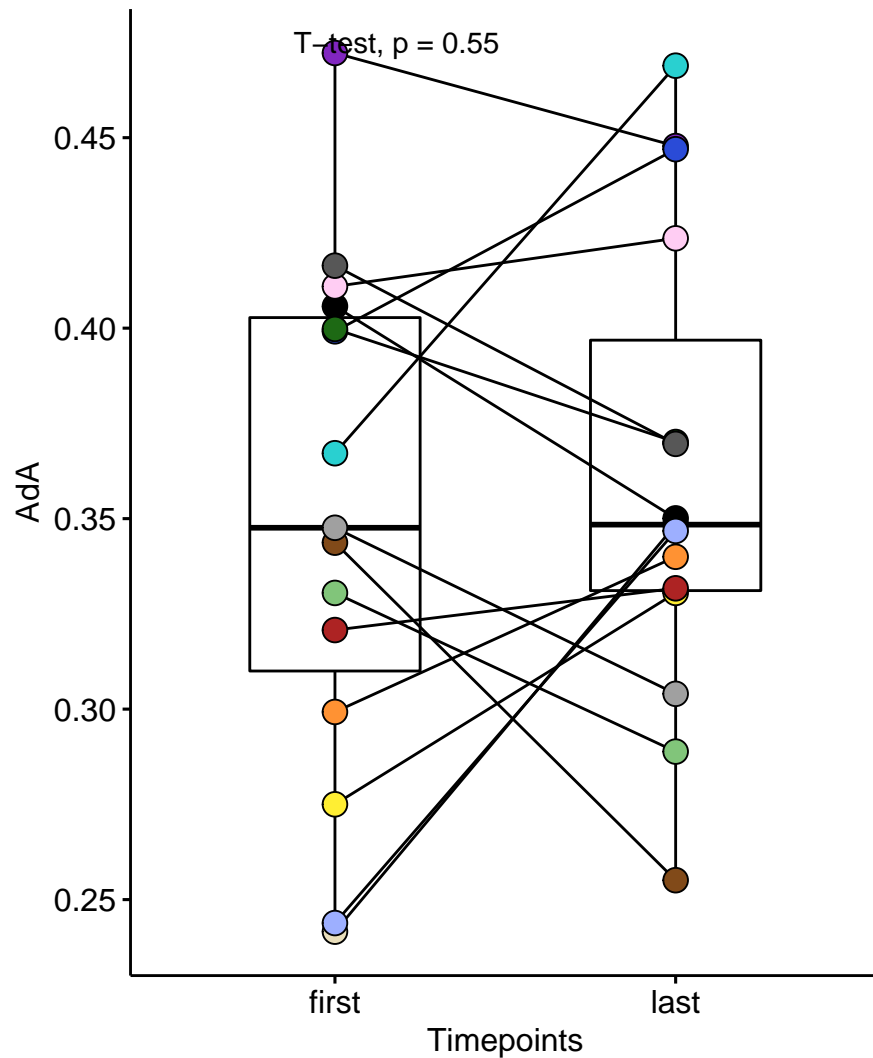

M

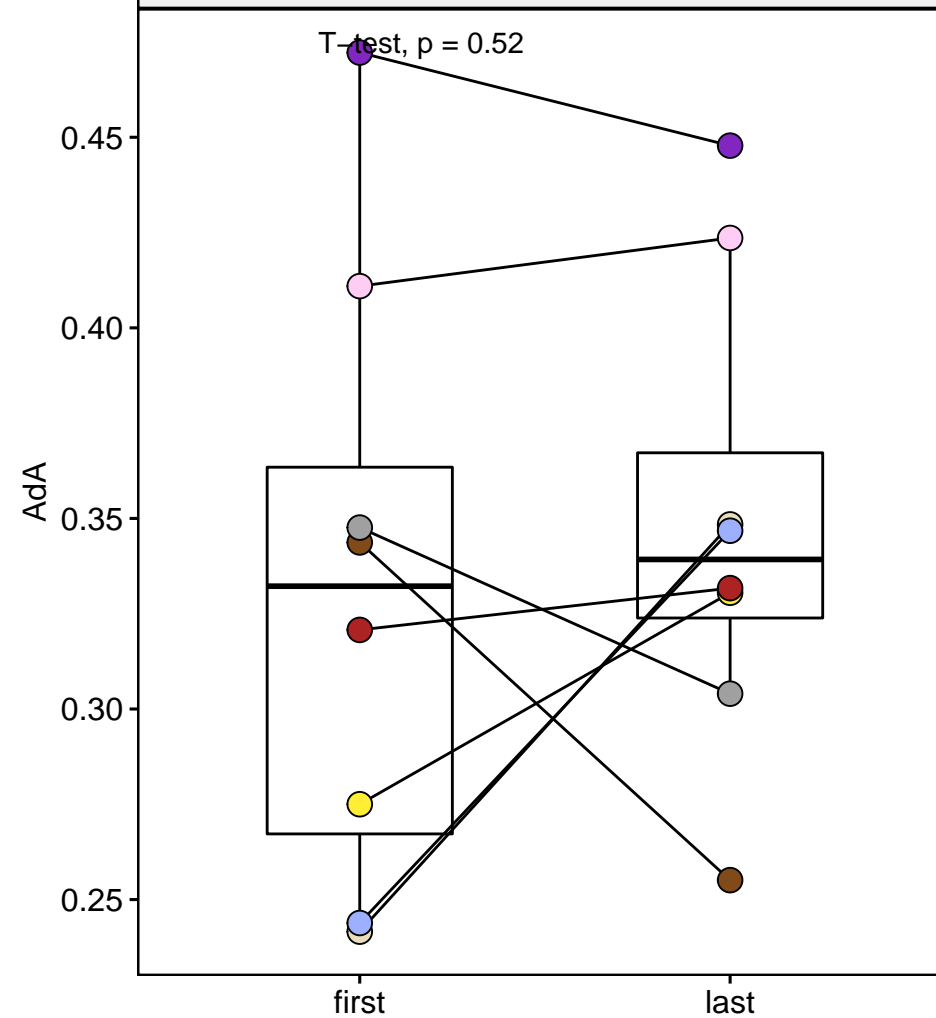

F

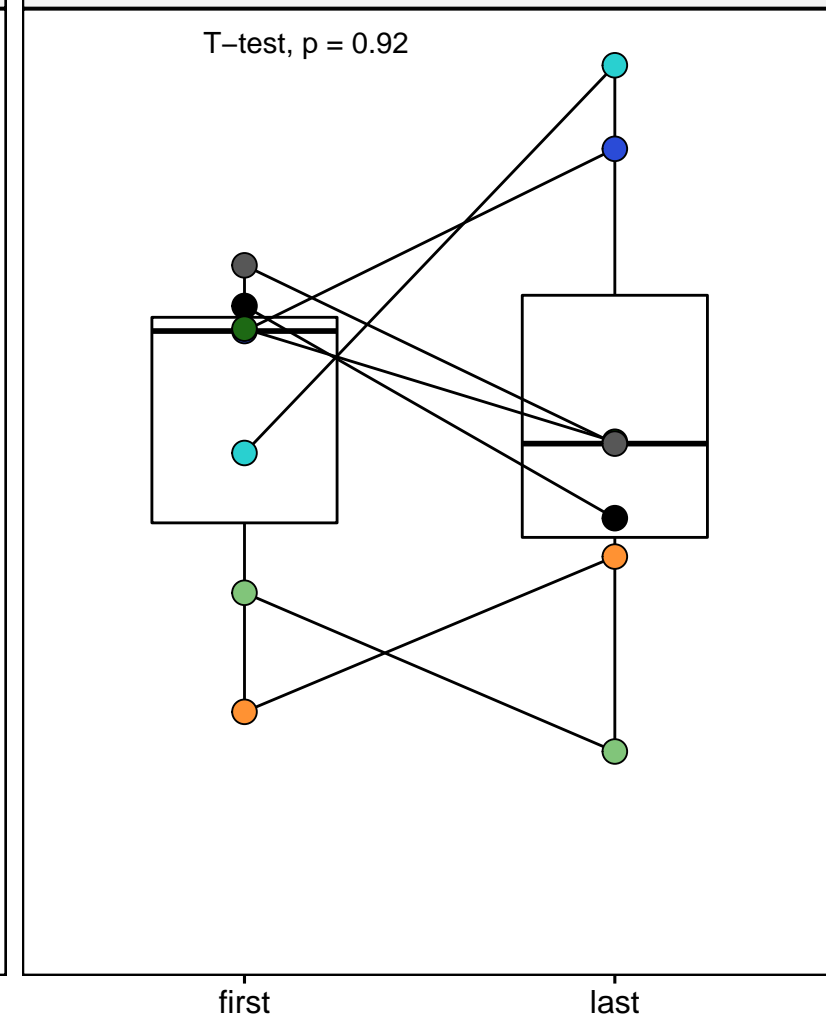

PatID

|                |                 |                |                |                |
|----------------|-----------------|----------------|----------------|----------------|
| ● 11_F68_8days | ● 18_F52_11days | ● 25_M87_3days | ● 30_M49_5days | ● 41_M70_6days |
| ● 12_F73_7days | ● 21_F53_9days  | ● 27_M71_4days | ● 32_F69_3days | ● 44_M57_5days |
| ● 13_M74_4days | ● 22_M65_3days  | ● 28_F53_6days | ● 40_F69_4days | ● 6_M79_8days  |



all patients (M+F)

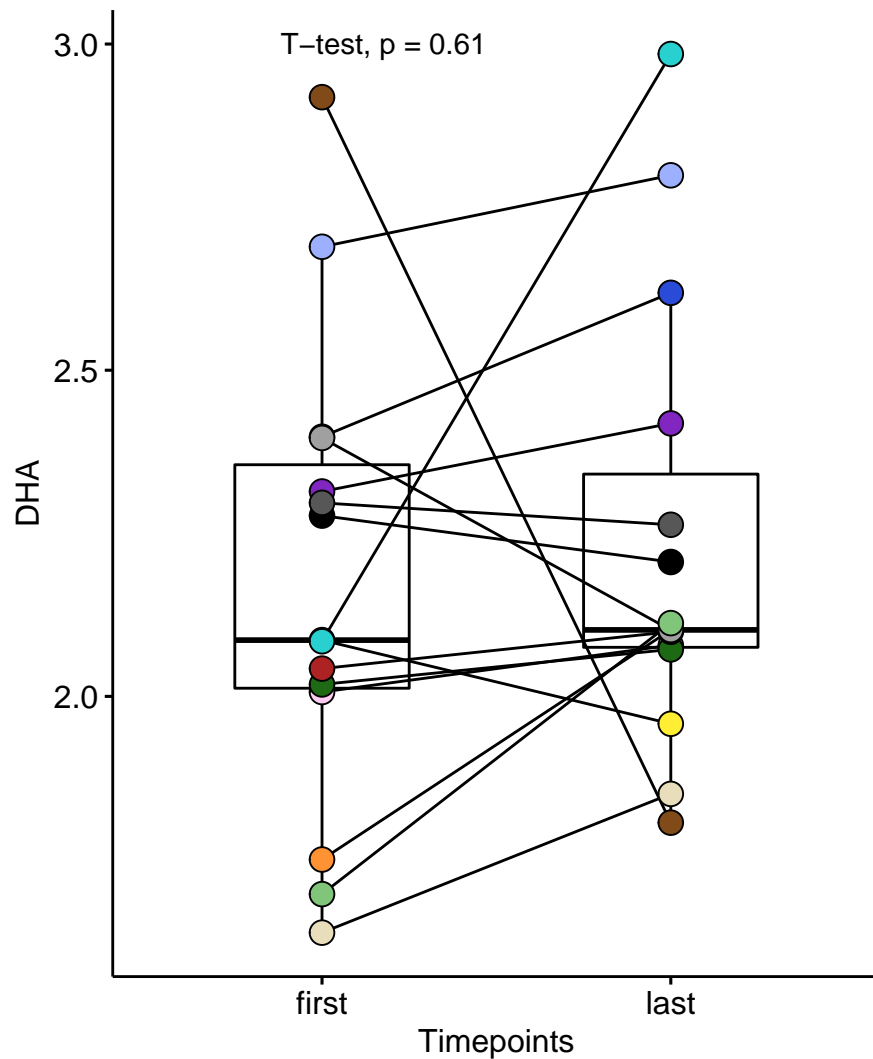

DHA

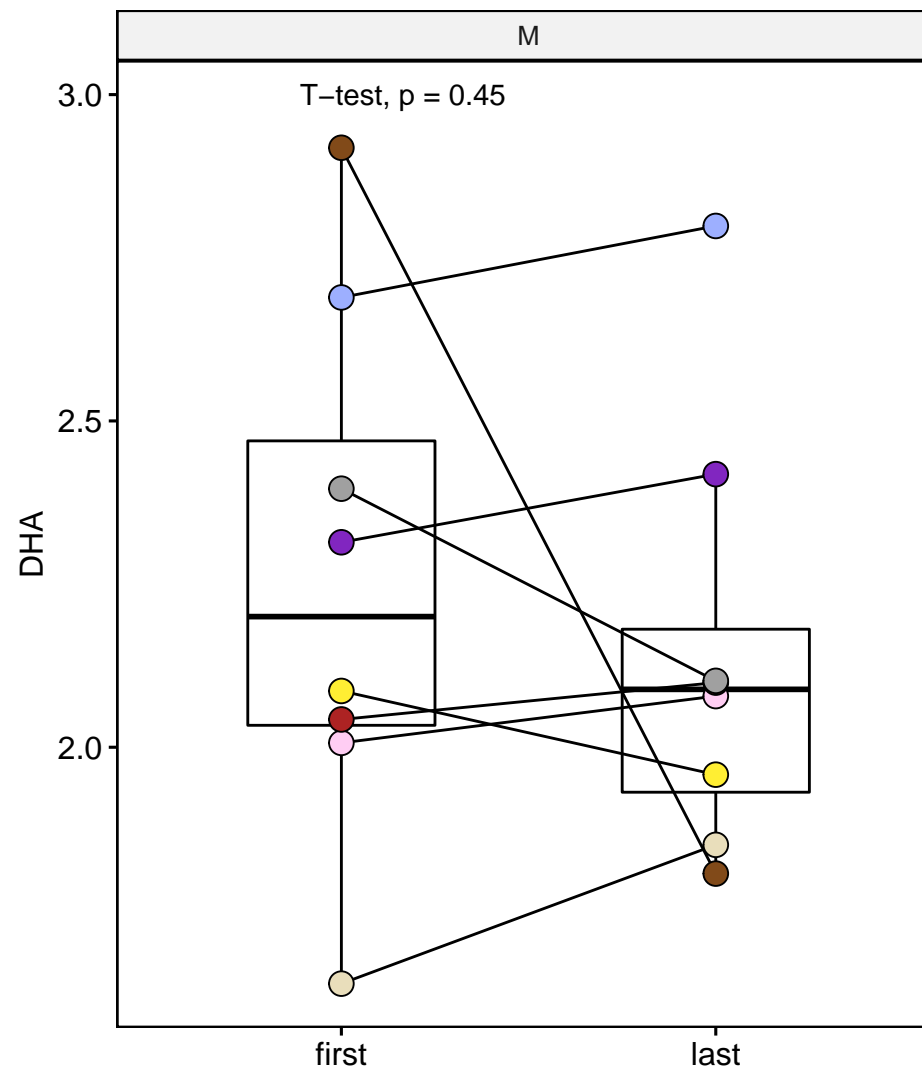

F

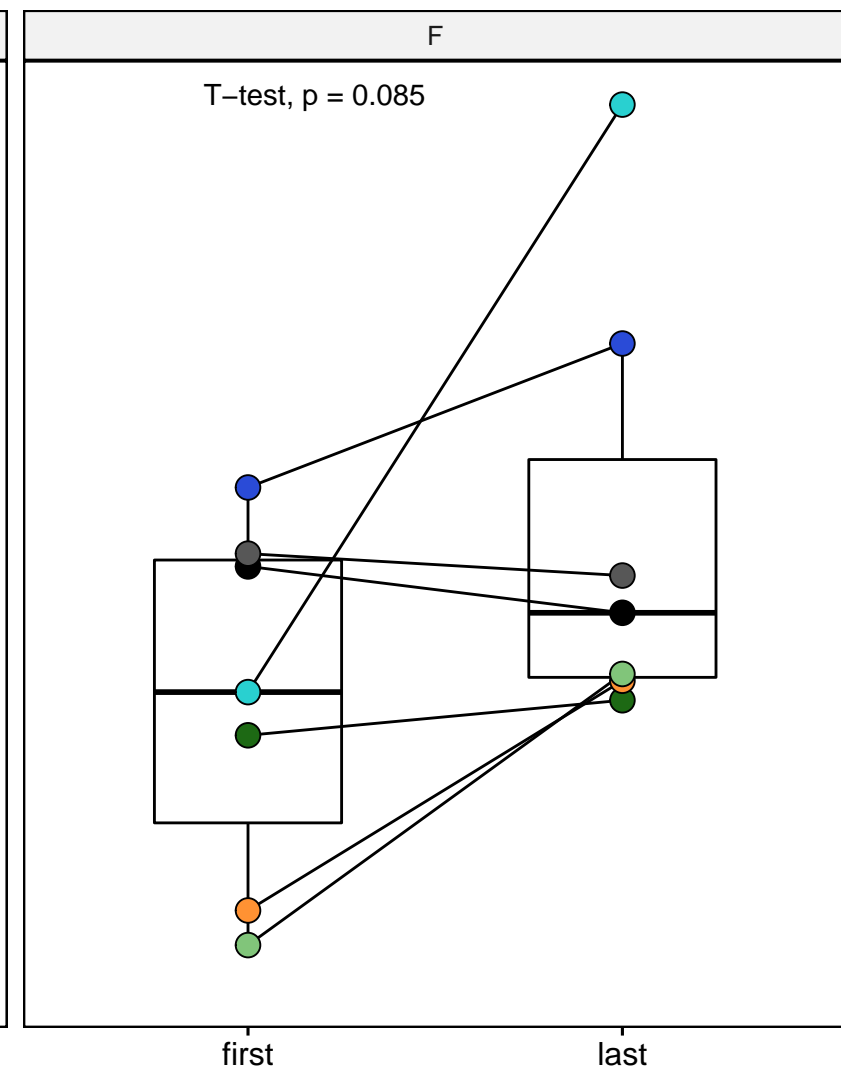

PatID

|                |                 |                |                |                |
|----------------|-----------------|----------------|----------------|----------------|
| ● 11_F68_8days | ● 18_F52_11days | ● 25_M87_3days | ● 30_M49_5days | ● 41_M70_6days |
| ● 12_F73_7days | ● 21_F53_9days  | ● 27_M71_4days | ● 32_F69_3days | ● 44_M57_5days |
| ● 13_M74_4days | ● 22_M65_3days  | ● 28_F53_6days | ● 40_F69_4days | ● 6_M79_8days  |

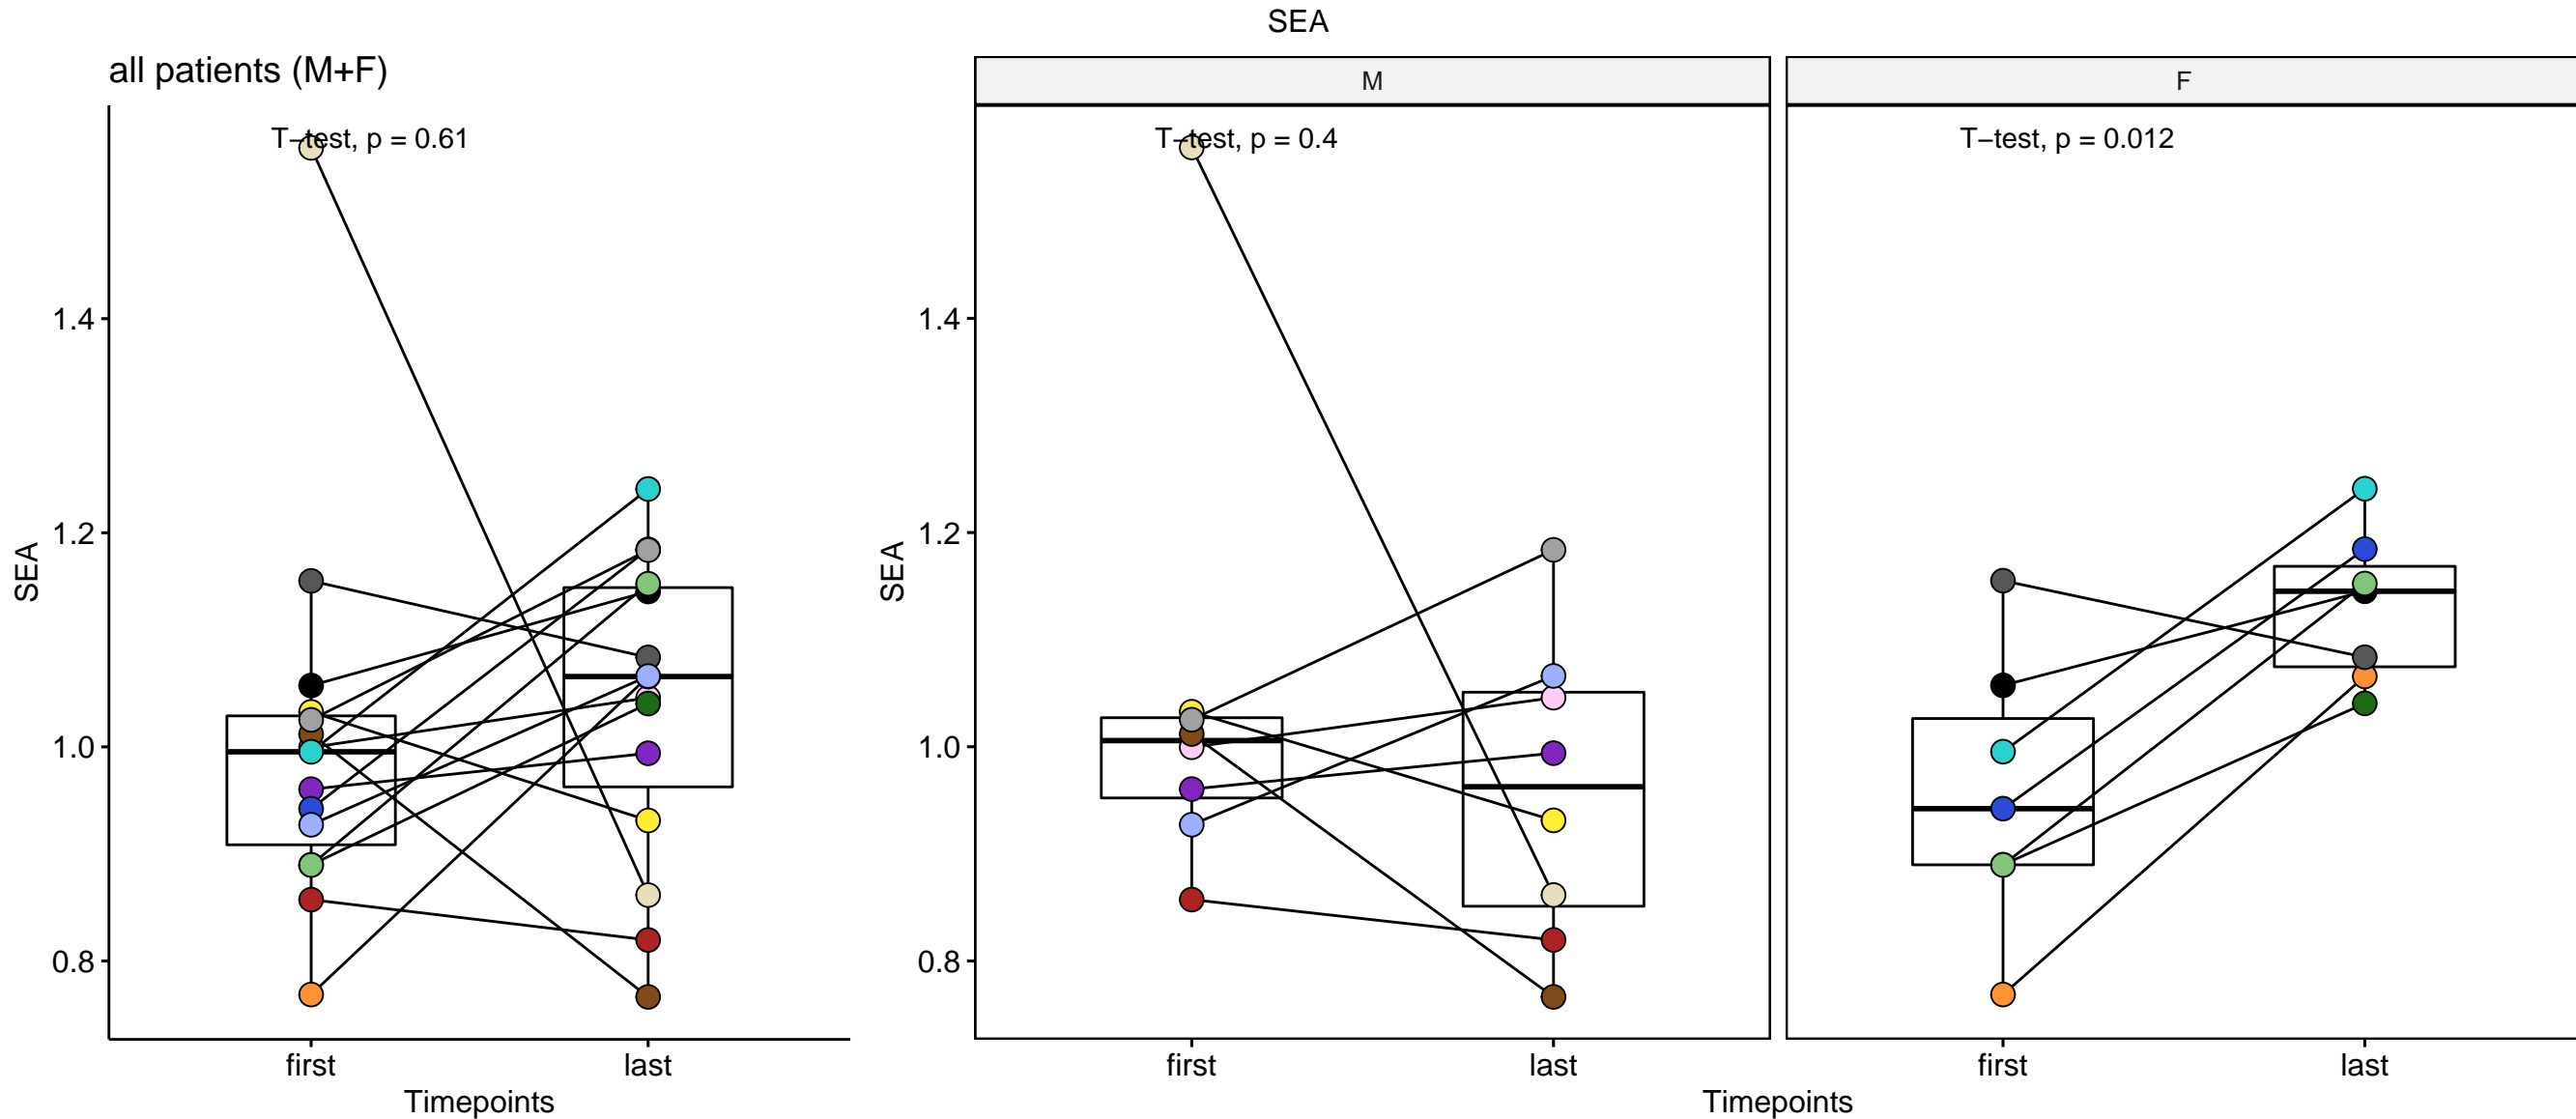

PatID

|              |               |              |              |              |
|--------------|---------------|--------------|--------------|--------------|
| 11_F68_8days | 18_F52_11days | 25_M87_3days | 30_M49_5days | 41_M70_6days |
| 12_F73_7days | 21_F53_9days  | 27_M71_4days | 32_F69_3days | 44_M57_5days |
| 13_M74_4days | 22_M65_3days  | 28_F53_6days | 40_F69_4days | 6_M79_8days  |

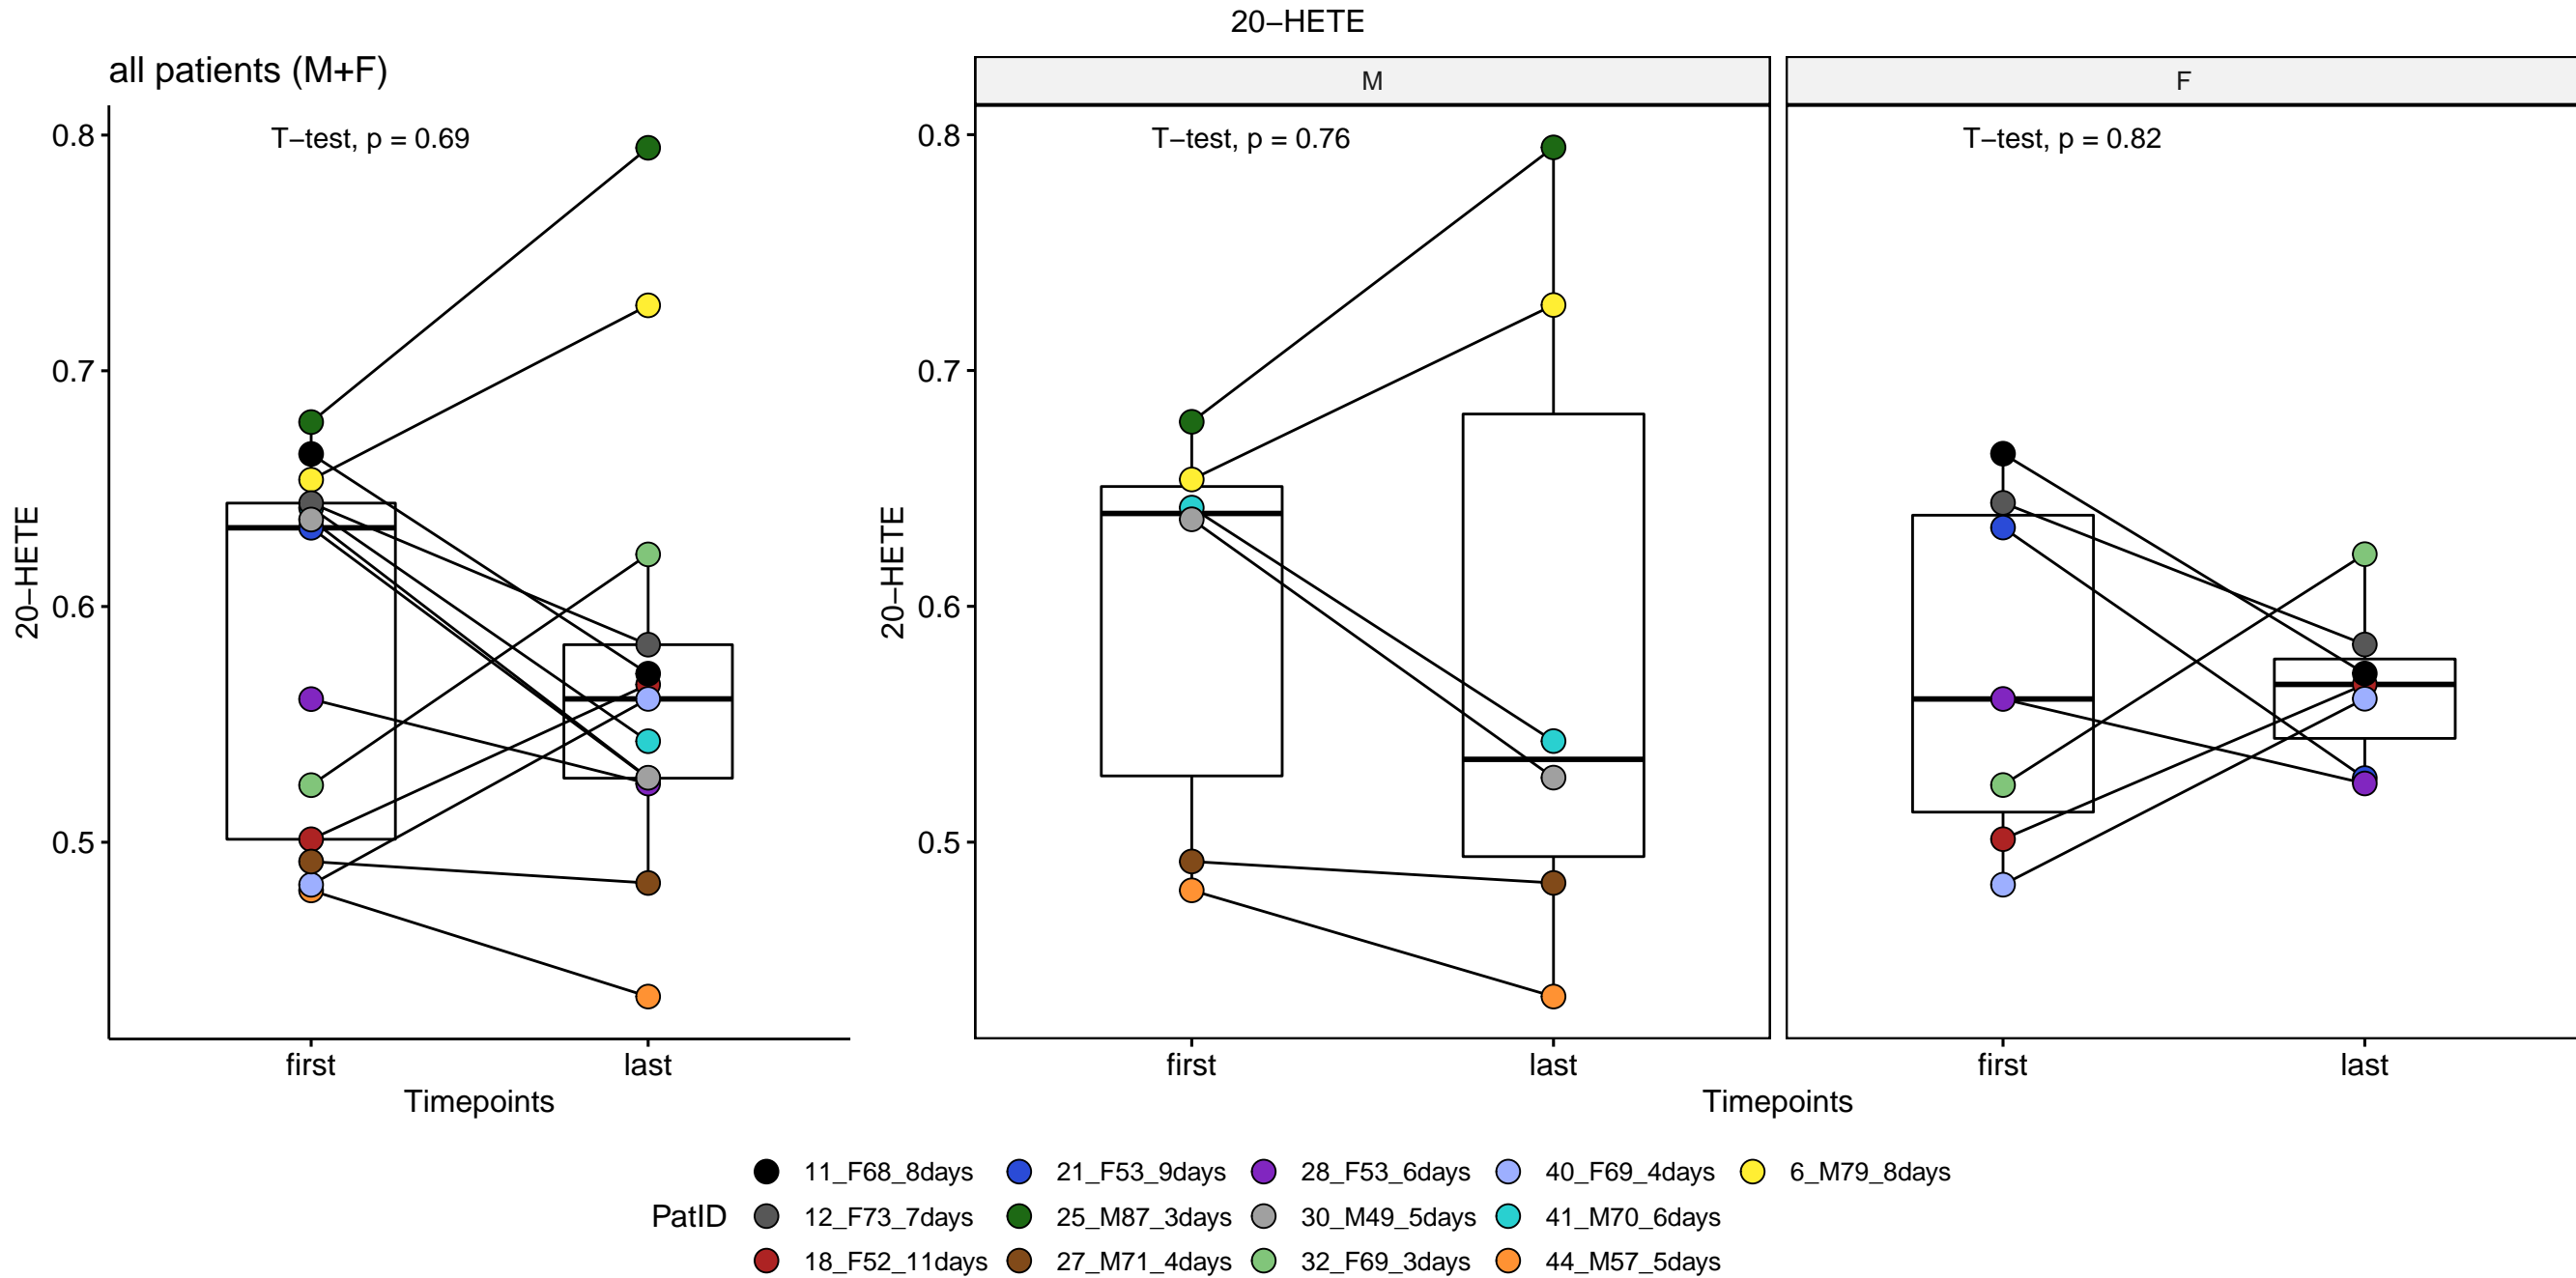

all patients (M+F)

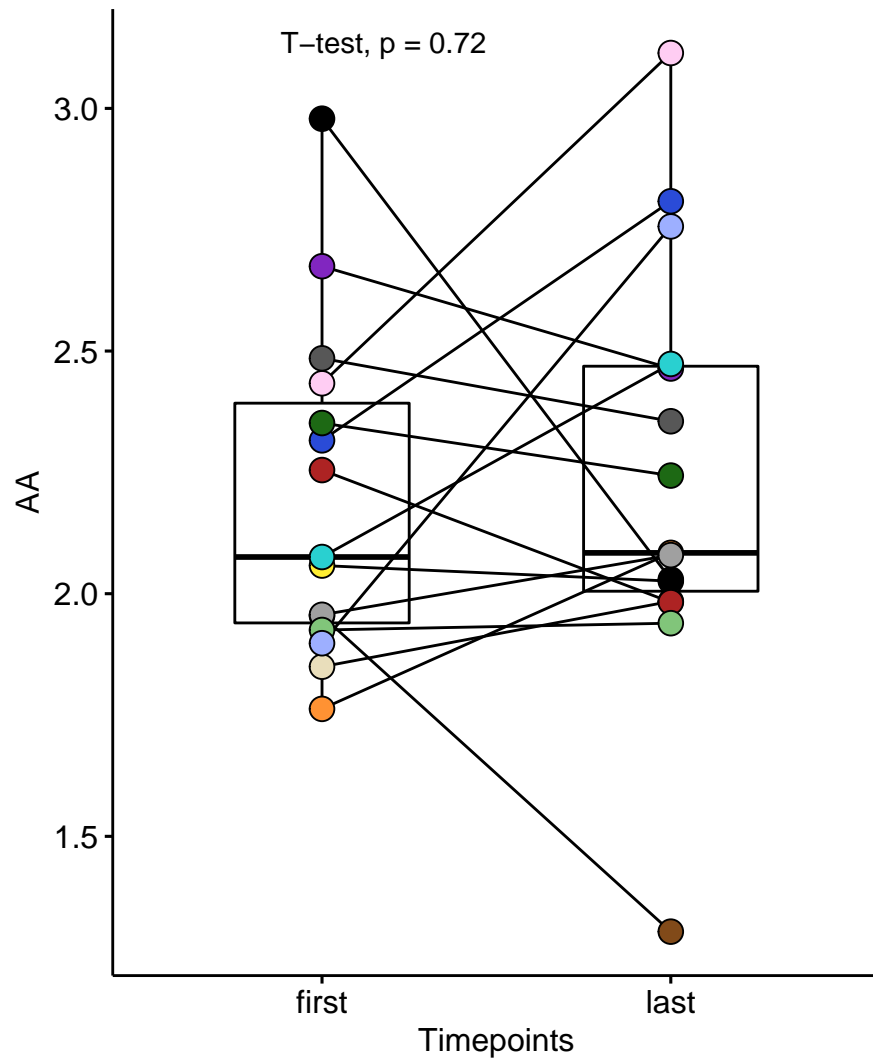

AA

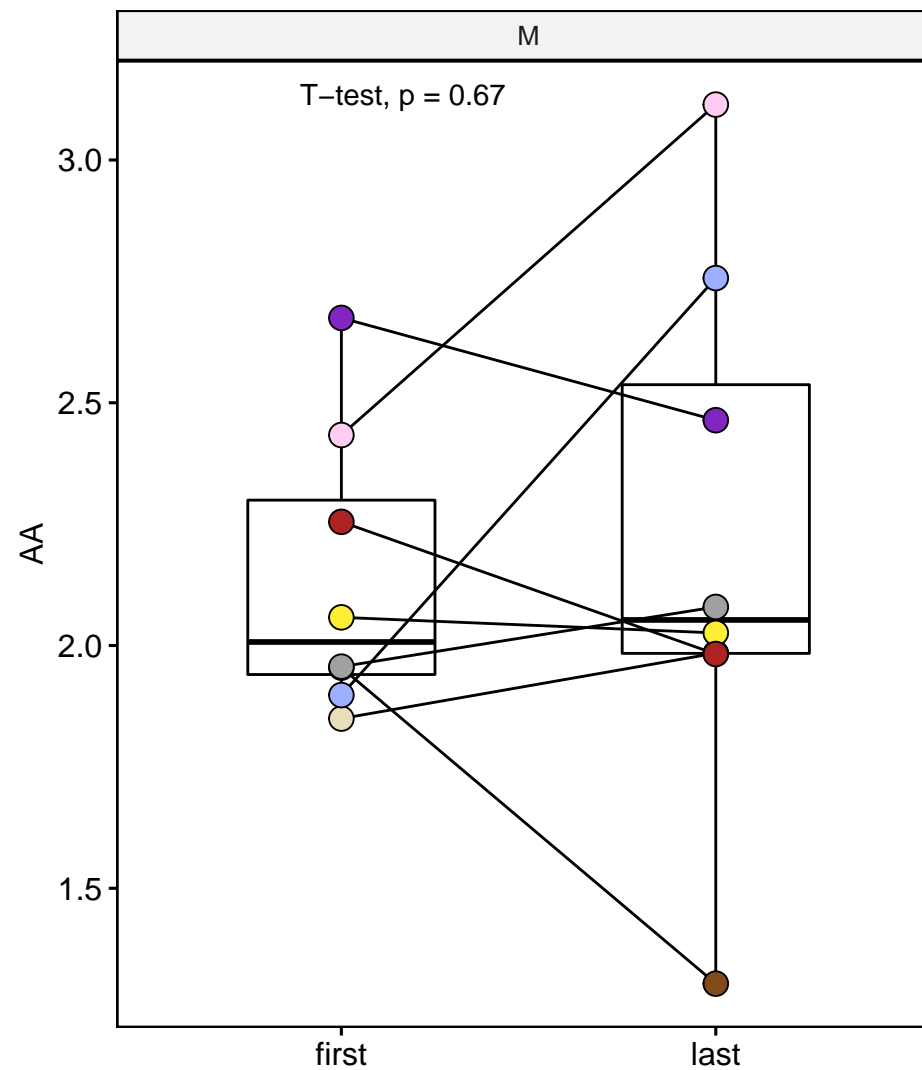

F

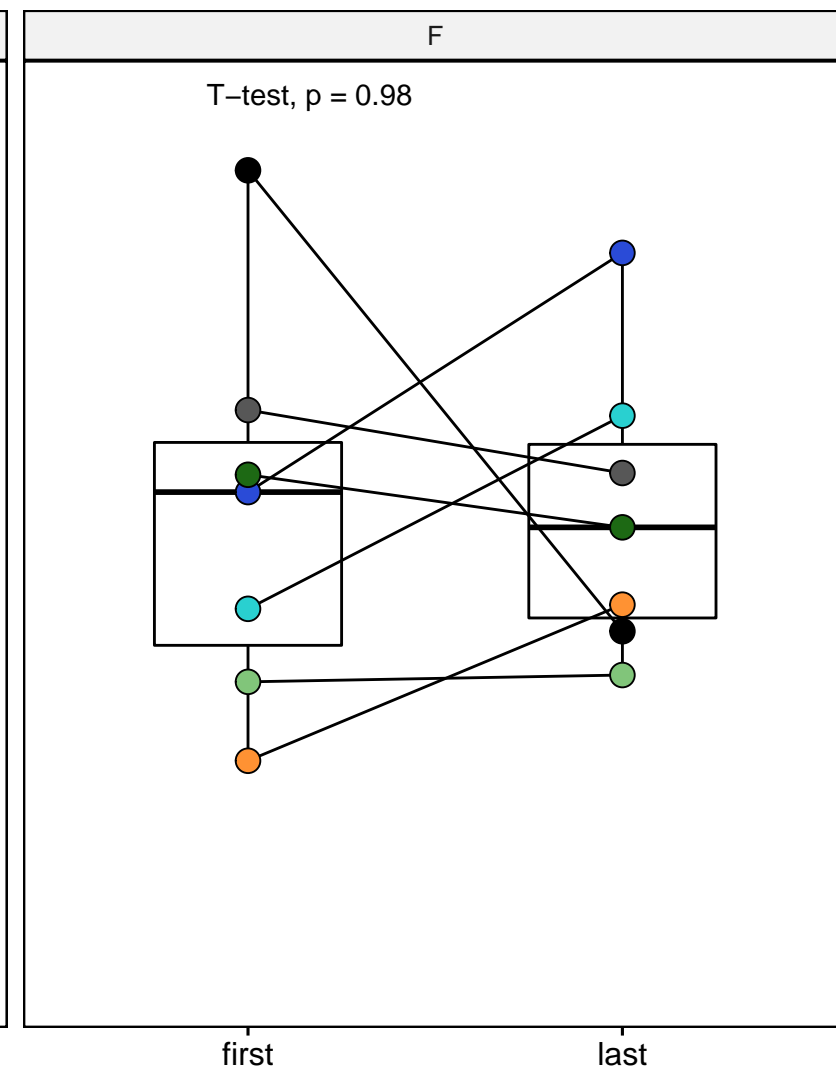

PatID

|                |                 |                |                |                |
|----------------|-----------------|----------------|----------------|----------------|
| ● 11_F68_8days | ● 18_F52_11days | ● 25_M87_3days | ● 30_M49_5days | ● 41_M70_6days |
| ● 12_F73_7days | ● 21_F53_9days  | ● 27_M71_4days | ● 32_F69_3days | ● 44_M57_5days |
| ● 13_M74_4days | ● 22_M65_3days  | ● 28_F53_6days | ● 40_F69_4days | ● 6_M79_8days  |

all patients (M+F)

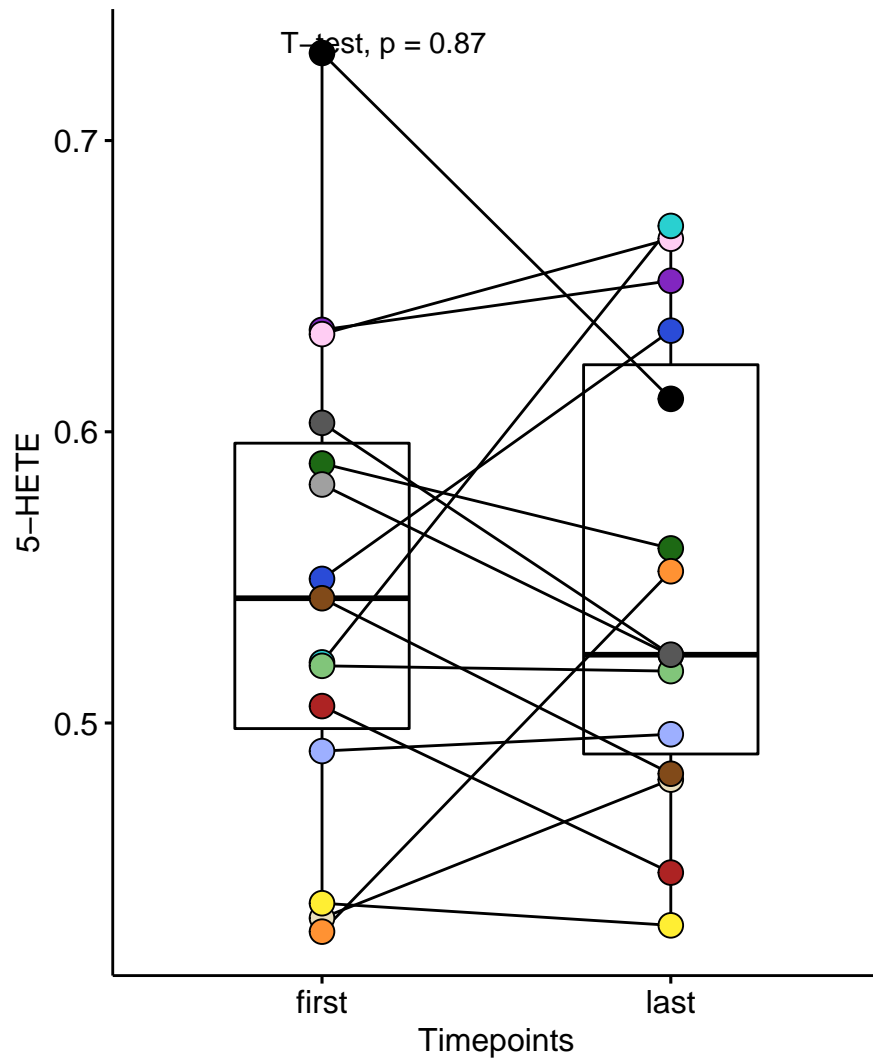

5-HETE

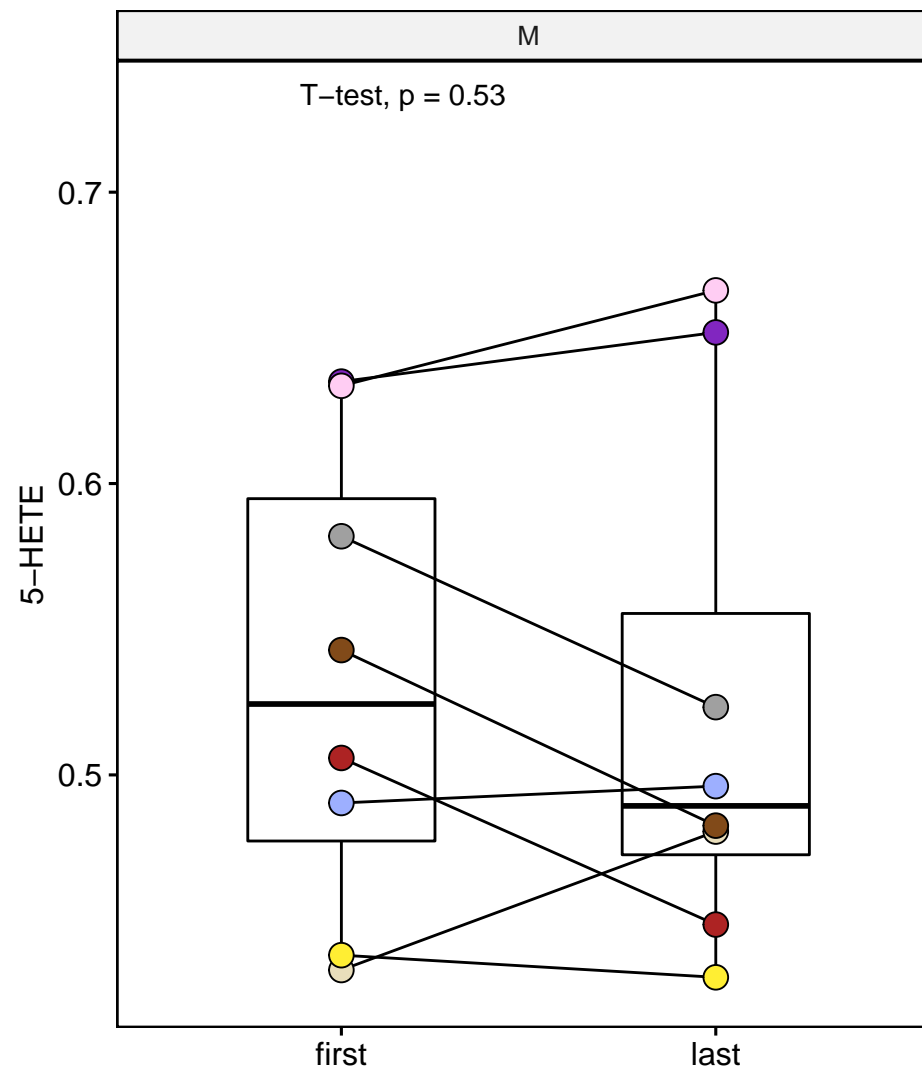

F

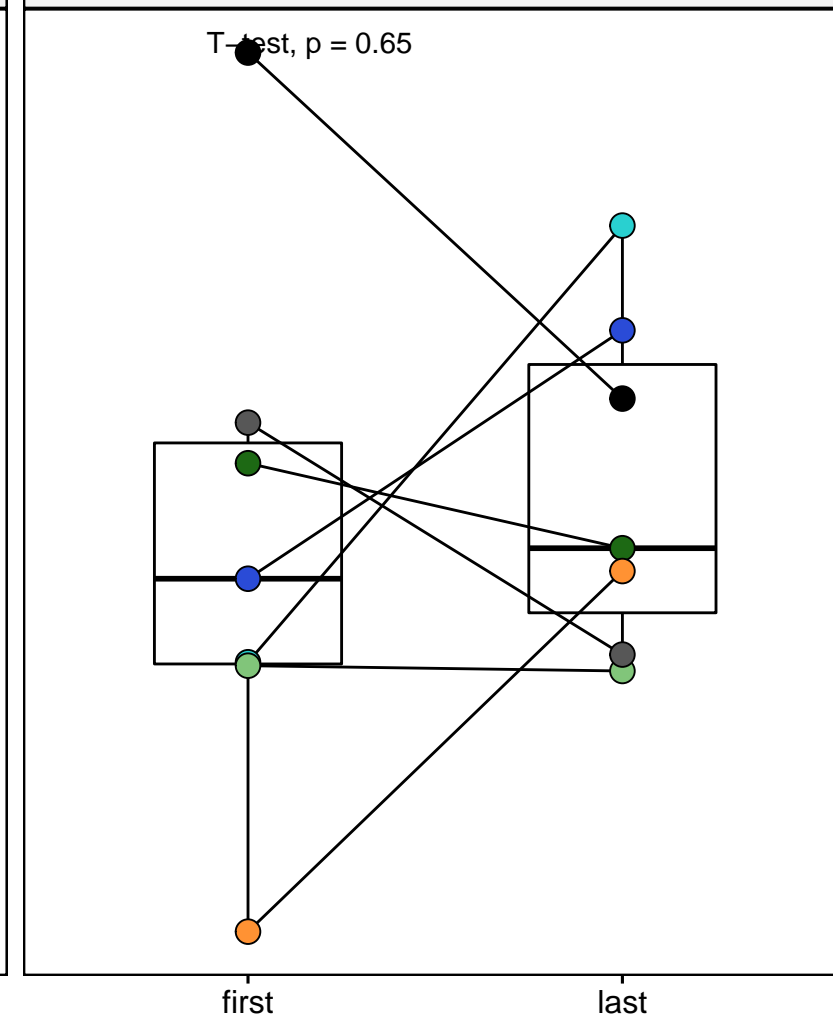

PatID

|                |                 |                |                |                |
|----------------|-----------------|----------------|----------------|----------------|
| ● 11_F68_8days | ● 18_F52_11days | ● 25_M87_3days | ● 30_M49_5days | ● 41_M70_6days |
| ● 12_F73_7days | ● 21_F53_9days  | ● 27_M71_4days | ● 32_F69_3days | ● 44_M57_5days |
| ● 13_M74_4days | ● 22_M65_3days  | ● 28_F53_6days | ● 40_F69_4days | ● 6_M79_8days  |

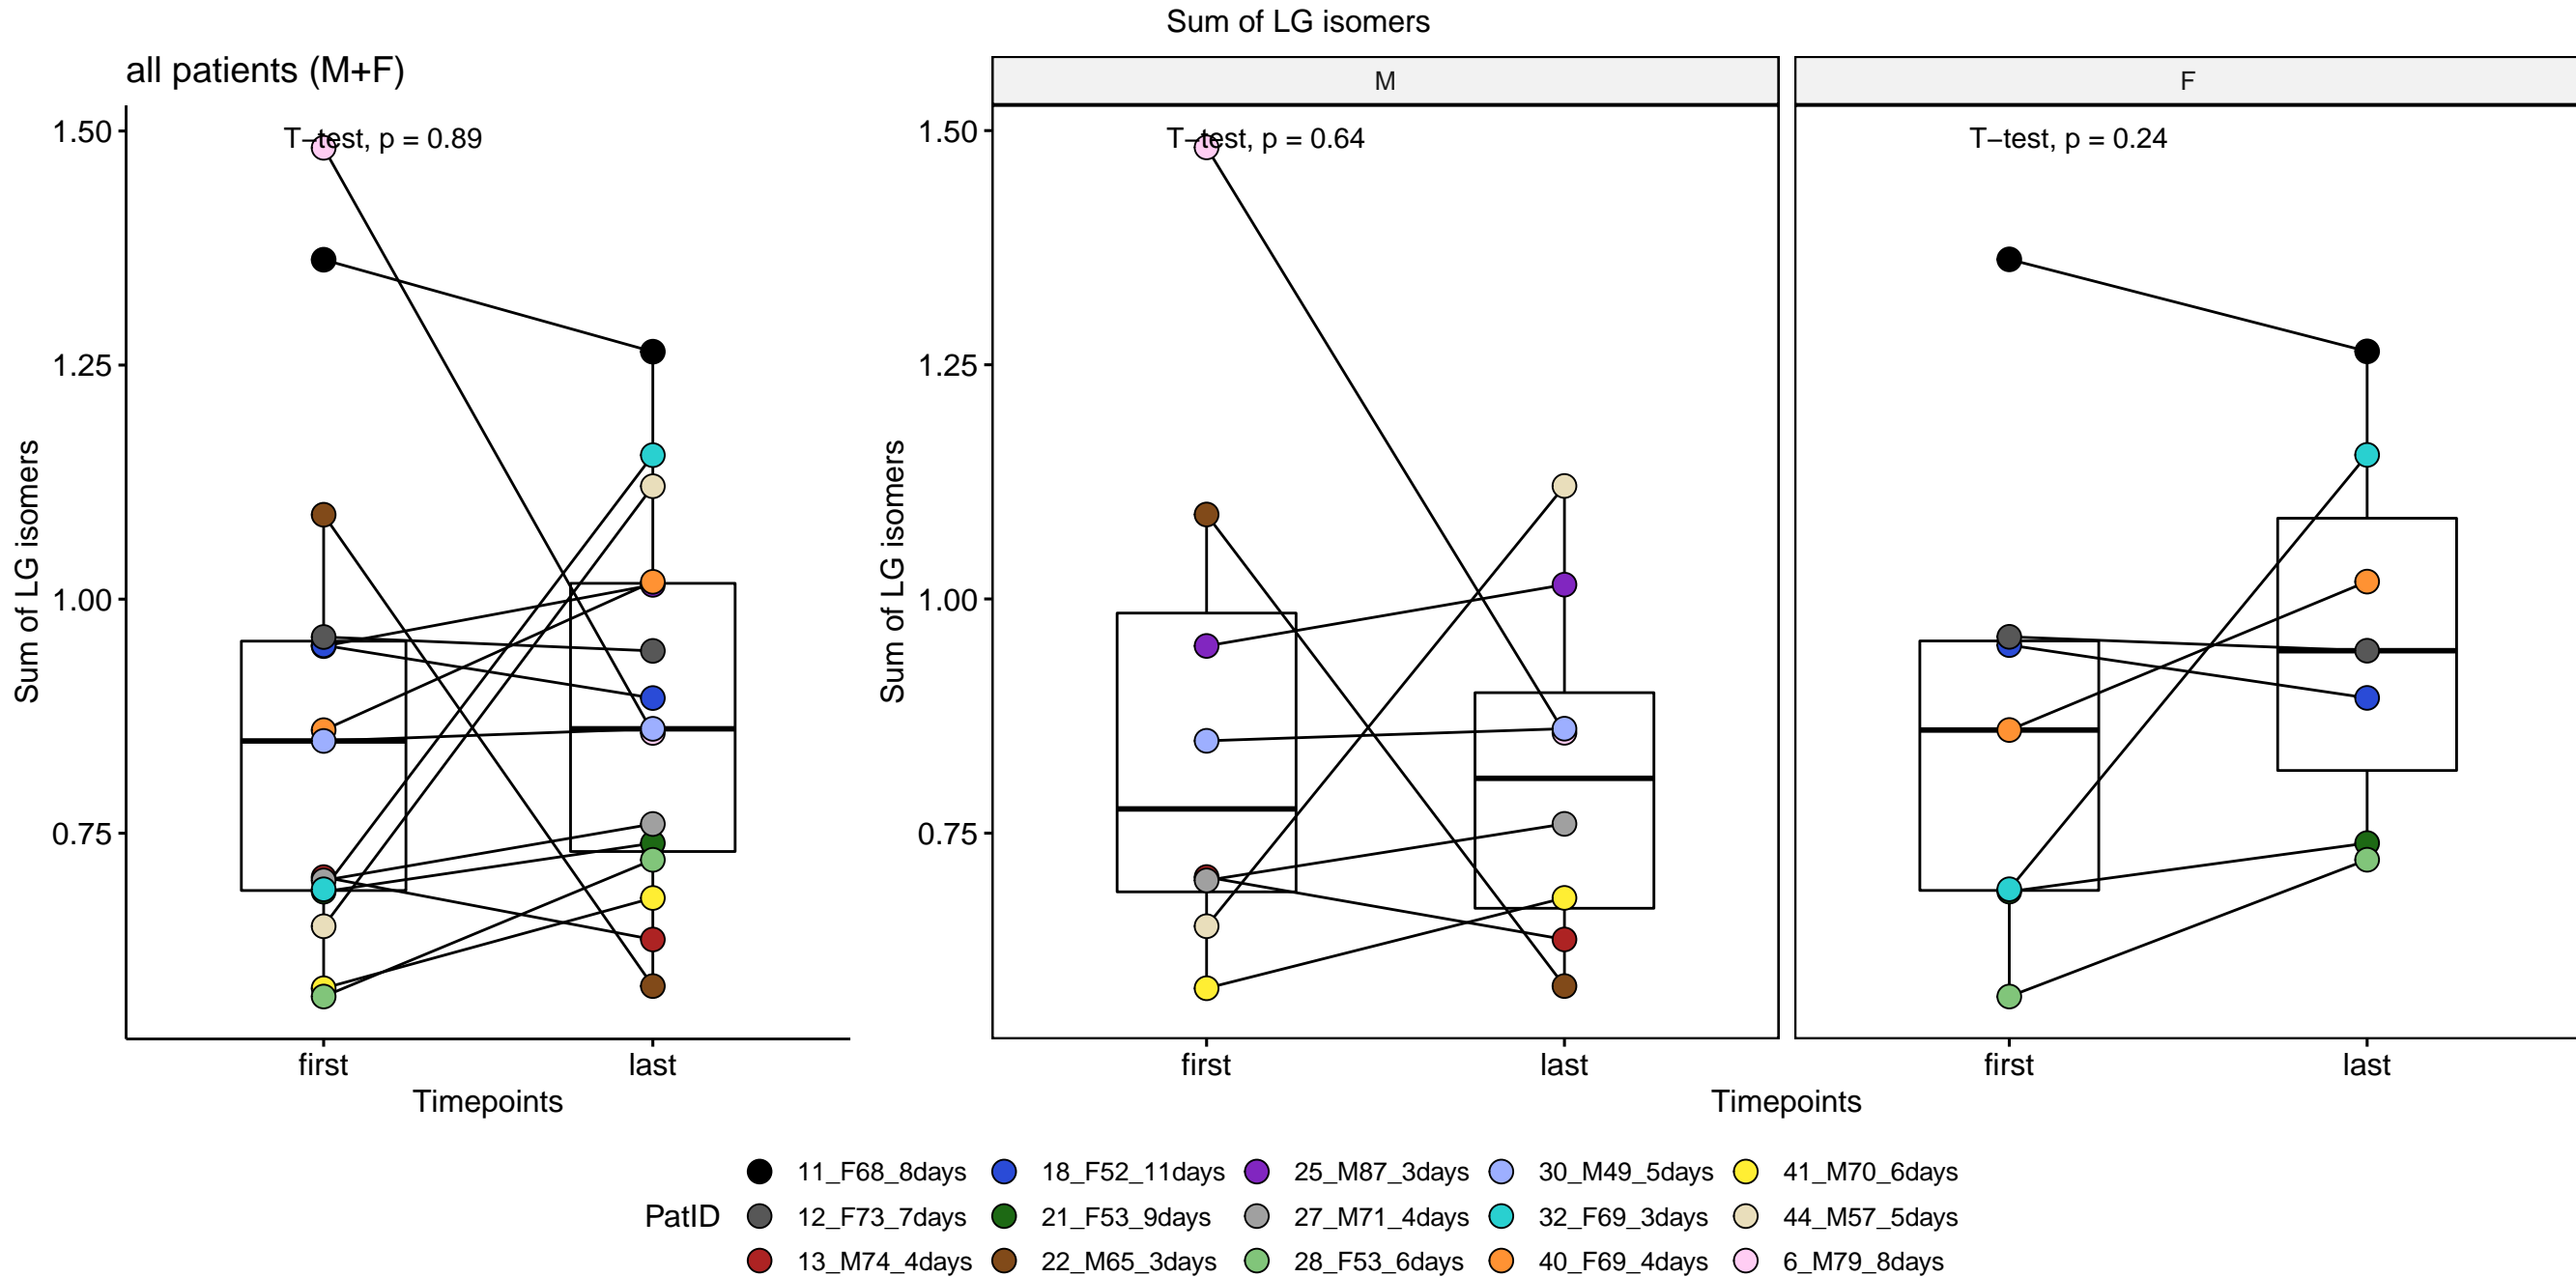

Sum of OG isomers

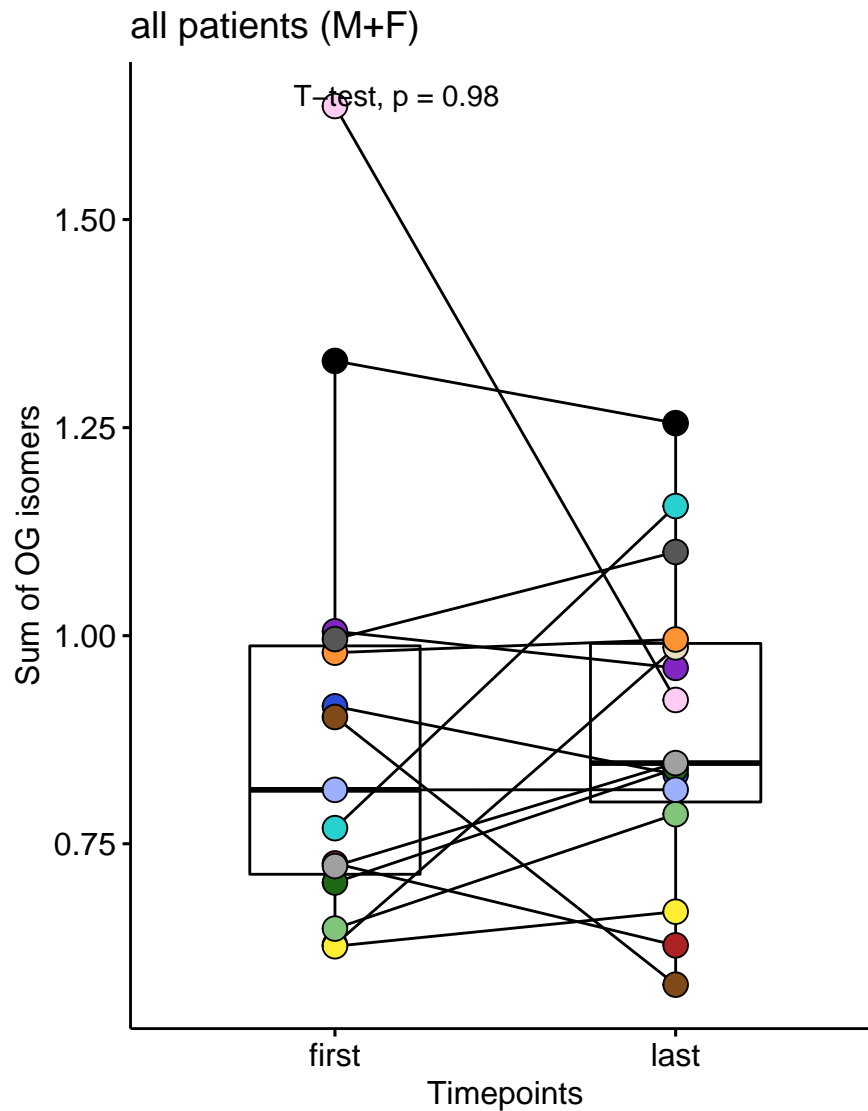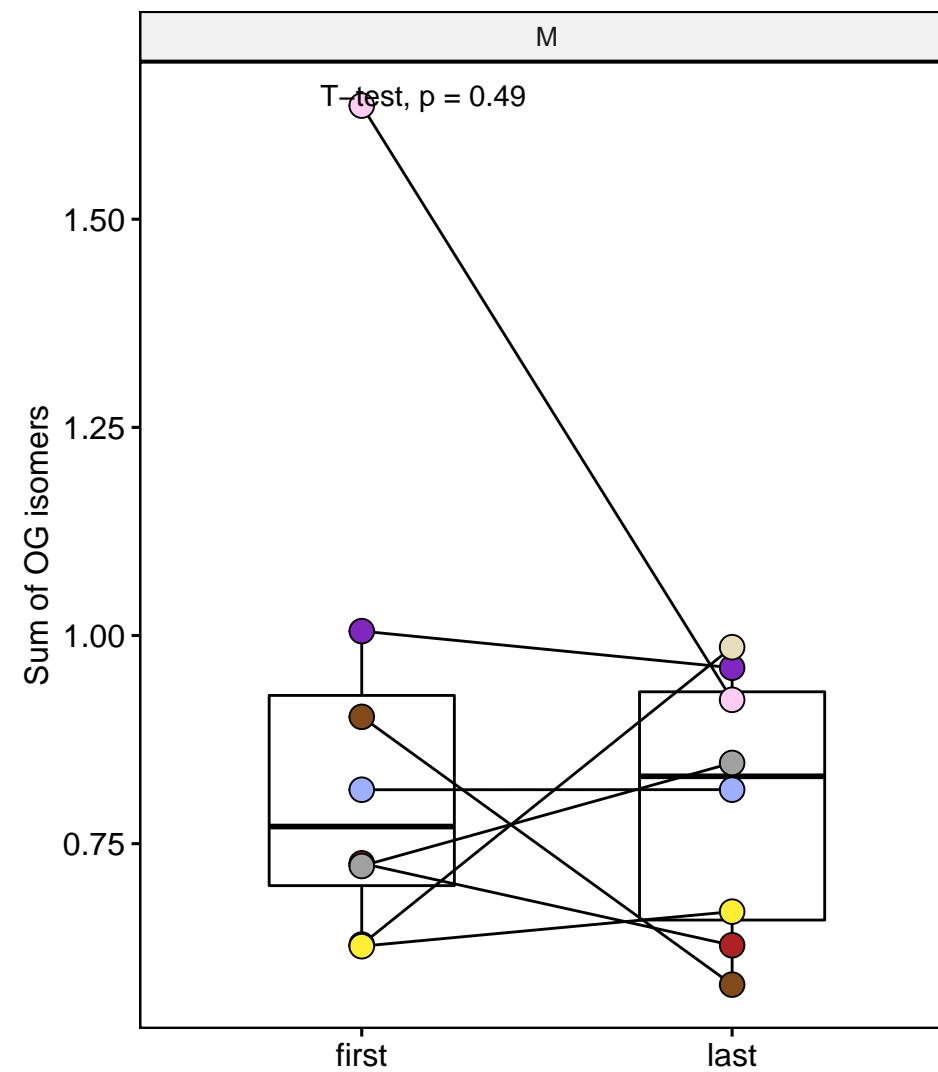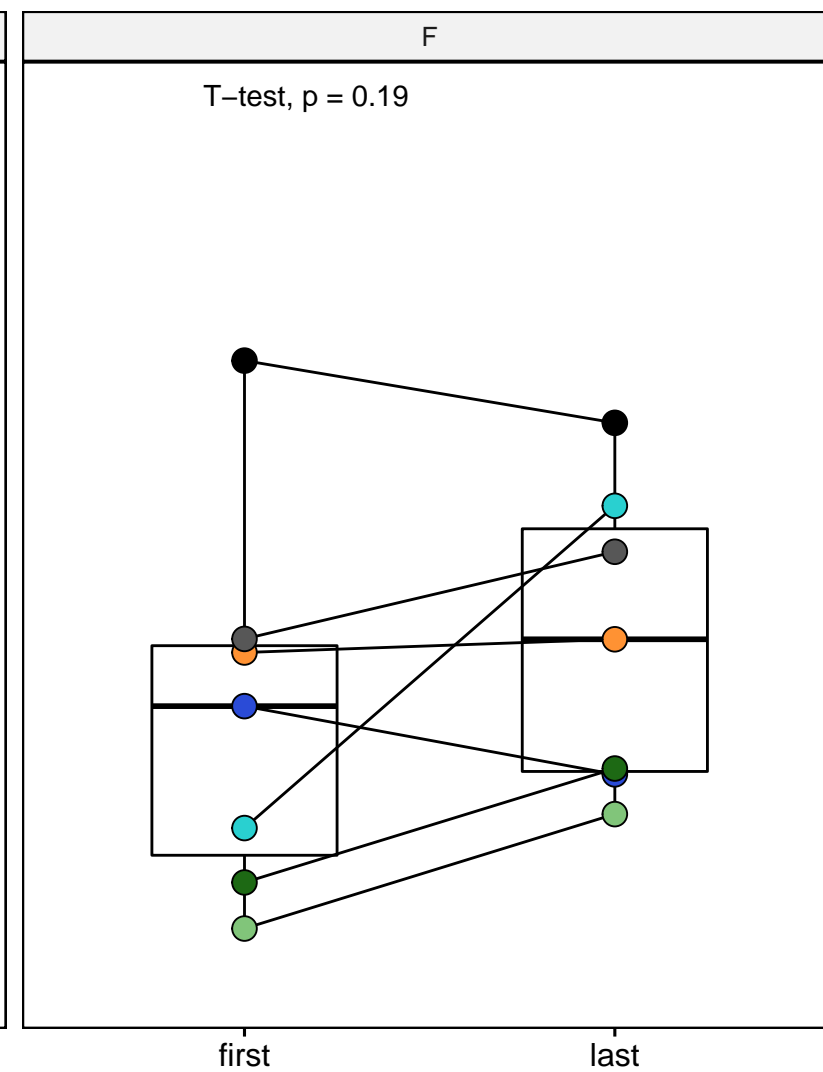

PatID

|              |               |              |              |              |
|--------------|---------------|--------------|--------------|--------------|
| 11_F68_8days | 18_F52_11days | 25_M87_3days | 30_M49_5days | 41_M70_6days |
| 12_F73_7days | 21_F53_9days  | 27_M71_4days | 32_F69_3days | 44_M57_5days |
| 13_M74_4days | 22_M65_3days  | 28_F53_6days | 40_F69_4days | 6_M79_8days  |
